# Supplementary material for: An Empirical Comparison of Ensemble model and Deep Learning Models for Multi-Level Arabic Fake News Classification using JoNewsFake Dataset
Source: Research Square preprint supplement (doi:10.21203/rs.3.rs-7424709/v1), 2025-09-16
Supplement: Supplementary file 1 [file fa460231a764290d8ebb27b8.xlsx]

## Sheet: DATASET
message	Main category-1	Sub category-1	Fake/Real-1		Main category-2	Sub category-2	Fake/Real-2	Text	POS Tags	Emotional Indicators	Clean text		Predominant Main Category		Predominant Sub Category		Predominant Fake/Real
ارتفاع عدد شهداء القصف الإسرائيلي الذي استهدف سيارة مدنية في رفح جنوبي قطاع غزة إلى الأردن	Politics	Israeli-Palestinian Conflict	Real		Politics	Israeli-Palestinian Conflict	Real	ارتفاع عدد شهداء القصف الإسرائيلي الذي استهدف سيارة مدنية في رفح جنوبي قطاع غزة إلى الأردن	[('', 'ارتفاع/NN'), ('', 'عدد/NN'), ('', 'شهداء/NN'), ('', 'القصف/DTNN'), ('', 'الإسرائيلي/DTJJ'), ('', 'الذي/WP'), ('', 'استهدف/VBD'), ('', 'سيارة/NN'), ('', 'مدنية/JJ'), ('', 'في/IN'), ('', 'رفح/NNP'), ('', 'جنوبي/NN'), ('', 'قطاع/NN'), ('', 'غزة/NNP'), ('', 'إلى/VBD'), ('', 'الأردن/DTNN'), ('', 'التلفزيون/DTNN'), ('', 'الأردني/DTJJ')]	['حزن']	ارتفاع عدد شهداء قصف اسراييل استهدف سيار مدن رفح جنوب قطاع غز ارد تلفز اردن		Politics		Israeli-Palestinian Conflict		Real
مباشر برنامج مال وأعمال أثر التكنولوجيا على الملاحة السبت	Media	Analysis	Real		Media	News	Real	مباشر برنامج مال وأعمال أثر التكنولوجيا على الملاحة السبت	[('', 'مباشر/JJ'), ('', 'برنامج/NN'), ('', 'مال/NN'), ('', 'وأعمال/JJ'), ('', 'أثر/VBD'), ('', 'التكنولوجيا/DTNN'), ('', 'على/IN'), ('', 'الملاحة/DTNN'), ('', 'التلفزيون/DTNN'), ('', 'الأردني/DTJJ'), ('', 'الاردن/DTNNP'), ('', 'السبت/DTNN')]	['اشمئزاز']	مباشر رنامج مال اعمال اثر تكنولوج ملاح تلفز اردن ارد الس		Media		Analysis		Real
بريطانيا معارضة نتنياهو لإقامة دولة فلسطينية عقب الحرب غير مقبولة الأردن	Politics	Israeli-Palestinian Conflict	Real		Politics	Israeli-Palestinian Conflict	Real	بريطانيا معارضة نتنياهو لإقامة دولة فلسطينية عقب الحرب غير مقبولة الأردن	[('', 'بريطانيا/NNP'), ('', 'معارضة/NN'), ('', 'نتنياهو/NNP'), ('', 'لإقامة/NN'), ('', 'دولة/NN'), ('', 'فلسطينية/JJ'), ('', 'عقب/NN'), ('', 'الحرب/DTNN'), ('', 'غير/NN'), ('', 'مقبولة/JJ'), ('', 'الأردن/DTNN'), ('', 'التلفزيون/DTNN'), ('', 'الأردني/DTJJ')]	['غضب']	ريطان معارض نتنياه اقام دول سطين عقب حرب مقبول ارد تلفز اردن		Politics		Israeli-Palestinian Conflict		Real
المؤسسة المدنية أكثر من من أصنافنا محلية	Economy	Local	Real		Economy	Local	Real	المؤسسة المدنية أكثر من من أصنافنا محلية	[('', 'المؤسسة/DTNN'), ('', 'المدنية/DTJJ'), ('', 'أكثر/NN'), ('', 'من/IN'), ('', 'من/WP'), ('', 'أصنافنا/VBD'), ('', 'محلية/JJ'), ('', 'التلفزيون/DTNN'), ('', 'الأردني/DTJJ'), ('', 'الاردن/DTNNP')]	['No Emotion Detected']	موسس مدن اصناف محل تلفز اردن ارد		Economy		Local		Real
سمو ولي العهد عبر الانستغرام أداء جبار وقوي من نشامى منتخبنا اليوم يعطيكم ألف عافية أبدعتم كوريا كأس آسيا كأس آسيا	Sports	Football	Real		Sports	Football	Real	سمو ولي العهد عبر الانستغرام أداء جبار وقوي من نشامى منتخبنا اليوم يعطيكم ألف عافية أبدعتم كوريا كأس آسيا كأس آسيا	[('', 'سمو/NN'), ('', 'ولي/NN'), ('', 'العهد/DTNN'), ('', 'عبر/NN'), ('', 'الانستغرام/DTNN'), ('', 'أداء/NN'), ('', 'جبار/NN'), ('', 'وقوي/JJ'), ('', 'من/IN'), ('', 'نشامى/NN'), ('', 'منتخبنا/JJ'), ('', 'اليوم/DTNN'), ('', 'يعطيكم/VBP'), ('', 'ألف/NN'), ('', 'عافية/JJ'), ('', 'أبدعتم/VBD'), ('', 'الأردن/DTNN'), ('', 'الاردن/DTNNP'), ('', 'كوريا/NNP'), ('', 'كأس/NNP'), ('', 'آسيا/NNP'), ('', 'كأس/…	['حزن']	سمو ول عهد عبر انستغرام اداء جبار وقو نشامى منتخب يوم يعط عاف ابدعتم ارد ارد كور كاس اس كاس اس		Sports		Football		Real
تخريج المشاركين في دورات الروبوت والذكاء الاصطناعي	Education	Training	Real		Education	Training	Real	تخريج المشاركين في دورات الروبوت والذكاء الاصطناعي	[('', 'تخريج/NN'), ('', 'المشاركين/DTNNS'), ('', 'في/IN'), ('', 'دورات/NNS'), ('', 'الروبوت/DTNN'), ('', 'والذكاء/DTJJ'), ('', 'الاصطناعي/DTJJ'), ('', 'التلفزيون/DTNN'), ('', 'الأردني/DTJJ'), ('', 'الاردن/DTNNP')]	['No Emotion Detected']	تخريج مشارك دور روب ذكاء اصطناع تلفز اردن ارد		Education		Training		Real
أيلة تجدد اتفاقية الشراكة مع تكية أم علي وتدعم حملة لأجلك يا غزة	Humanitarian	Aid	Real		Humanitarian	Aid	Real	أيلة تجدد اتفاقية الشراكة مع تكية أم علي وتدعم حملة لأجلك يا غزة	[('', 'أيلة/NN'), ('', 'تجدد/NN'), ('', 'اتفاقية/NN'), ('', 'الشراكة/DTNN'), ('', 'مع/NN'), ('', 'تكية/NN'), ('', 'أم/NN'), ('', 'علي/IN'), ('', 'وتدعم/NN'), ('', 'حملة/NN'), ('', 'لأجلك/NN'), ('', 'يا/RP'), ('', 'غزة/NNP'), ('', 'التلفزيون/DTNN'), ('', 'الأردني/DTJJ'), ('', 'الاردن/DTNNP')]	['اشمئزاز']	ايل تجدد اتفاق شراك تك عل تدعم حمل لاجل غز تلفز اردن ارد		Humanitarian		Aid		Real
أول محطة لاستقبال الغاز الطبيعي المسال في العقبة الصناعية تدخل حيز اللإنشاء	Economy	Energy	Real		Economy	Energy	Real	أول محطة لاستقبال الغاز الطبيعي المسال في العقبة الصناعية تدخل حيز اللإنشاء	[('', 'أول/VBD'), ('', 'محطة/NN'), ('', 'لاستقبال/NNP'), ('', 'الغاز/DTNN'), ('', 'الطبيعي/DTJJ'), ('', 'المسال/DTJJ'), ('', 'في/IN'), ('', 'العقبة/DTNNP'), ('', 'الصناعية/DTJJ'), ('', 'تدخل/VBP'), ('', 'حيز/NN'), ('', 'اللإنشاء/DTNN'), ('', 'التلفزيون/DTNN'), ('', 'الأردني/DTJJ'), ('', 'الاردن/DTNNP')]	['No Emotion Detected']	محط استقبال غاز طبيع مسال عقب صناع تدخل حيز لانشاء تلفز اردن ارد		Economy		Energy		Real
النقابة اللوجستية عدة بواخر تصل ميناء العقبة خلال أيام	Economy	Local	Real		Economy	Local	Real	النقابة اللوجستية عدة بواخر تصل ميناء العقبة خلال أيام	[('', 'النقابة/DTNN'), ('', 'اللوجستية/DTJJ'), ('', 'عدة/JJ'), ('', 'بواخر/NN'), ('', 'تصل/VBP'), ('', 'ميناء/NN'), ('', 'العقبة/DTNNP'), ('', 'خلال/NN'), ('', 'أيام/NN'), ('', 'التلفزيون/DTNN'), ('', 'الأردني/DTJJ'), ('', 'الاردن/DTNNP')]	['No Emotion Detected']	نقاب لوجست عد واخر تصل ميناء عقب خلال ايام تلفز اردن ارد		Economy		Local		Real
برنامج بين السطور قراءة وتحليل لأبرز ماتداوله الكتّاب في الصحف المحليّة والعربيّة والعالميّة الاردن التلفزيون الأردن	Media	Analysis	Real		Media	TV Show	Real	برنامج بين السطور قراءة وتحليل لأبرز ماتداوله الكتّاب في الصحف المحليّة والعربيّة والعالميّة الاردن التلفزيون الأردن	[('', 'برنامج/NN'), ('', 'بين/NN'), ('', 'السطور/DTNN'), ('', 'قراءة/NN'), ('', 'وتحليل/NN'), ('', 'لأبرز/NNP'), ('', 'ماتداوله/NNP'), ('', 'الكتاب/DTNN'), ('', 'في/IN'), ('', 'الصحف/DTNN'), ('', 'المحلية/DTJJ'), ('', 'والعربية/NN'), ('', 'والعالمية/JJ'), ('', 'الاردن/DTNNP'), ('', 'التلفزيون/DTNN'), ('', 'الأردن/DTJJ')]	['No Emotion Detected']	رنامج سطور قراء تحليل ابرز ماتداول كتاب صحف محل عرب عالم ارد تلفز ارد		Media		Analysis		Real
وزير الصحة يفتتح مركزي ساكب والجبة الأوليين	Health	Medical Services	Real		Health	Medical Services	Real	وزير الصحة يفتتح مركزي ساكب والجبة الأوليين	[('', 'وزير/NN'), ('', 'الصحة/DTNN'), ('', 'يفتتح/VBP'), ('', 'مركزي/NNS'), ('', 'ساكب/NN'), ('', 'والجبة/NN'), ('', 'الأوليين/DTNNS'), ('', 'التلفزيون/DTNN'), ('', 'الأردني/DTJJ'), ('', 'الاردن/DTNNP')]	['No Emotion Detected']	زير الصح يفتتح مركز ساكب والجب اول تلفز اردن ارد		Health		Medical Services		Real
صرف بدل المحــروقات لمشغلي وسائط النقل العام يوم الإثنين	Economy	Financial Policies	Real		Economy	Financial Policies	Real	صرف بدل المحــروقات لمشغلي وسائط النقل العام يوم الإثنين	[('', 'صرف/NN'), ('', 'بدل/NN'), ('', 'المحــروقات/DTNNS'), ('', 'لمشغلي/NNP'), ('', 'وسائط/NN'), ('', 'النقل/DTNN'), ('', 'العام/DTJJ'), ('', 'يوم/NN'), ('', 'الإثنين/DTNNS'), ('', 'التلفزيون/DTNN'), ('', 'الأردني/DTJJ'), ('', 'الاردن/DTNNP')]	['غضب']	صرف بدل محروق مشغل سايط نقل عام يوم اثن تلفز اردن ارد		Economy		Financial Policies		Real
الخارجية تعزي بضحايا الحريق في مدرسة ينغكاي بالصين	Government	Diplomacy Relations	Real		Government	Diplomacy Relations	Real	الخارجية تعزي بضحايا الحريق في مدرسة ينغكاي بالصين	[('', 'الخارجية/DTNN'), ('', 'تعزي/VBP'), ('', 'بضحايا/NN'), ('', 'الحريق/DTNN'), ('', 'في/IN'), ('', 'مدرسة/NN'), ('', 'ينغكاي/NNP'), ('', 'بالصين/NNP'), ('', 'التلفزيون/DTNN'), ('', 'الأردني/DTJJ'), ('', 'الاردن/DTNNP')]	['حزن']	خارج تعز ضحا حريق مدرس ينغك الص تلفز اردن ارد		Government		Diplomacy Relations		Real
عواصف شتوية تضرب عدة ولايات وتودي بالعشرات	Weather	Natural Disasters	Real		Weather	Natural Disasters	Real	عواصف شتوية تضرب عدة ولايات وتودي بالعشرات	[('', 'عواصف/NN'), ('', 'شتوية/JJ'), ('', 'تضرب/VBP'), ('', 'عدة/NN'), ('', 'ولايات/NNS'), ('', 'وتودي/JJ'), ('', 'بالعشرات/NNS'), ('', 'التلفزيون/DTNN'), ('', 'الأردني/DTJJ'), ('', 'الاردن/DTNNP')]	['Conflicting Emotions Detected']	عواصف شتو تضرب عد ولا تود عشر تلفز اردن ارد		Weather		Natural Disasters		Real
سناتور جمهوري انسحب من السباق الرئاسي يعلن تأييده لترامب	Politics	US Elections	Real		Politics	US Elections	Real	سناتور جمهوري انسحب من السباق الرئاسي يعلن تأييده لترامب	[('', 'سناتور/NNP'), ('', 'جمهوري/NNP'), ('', 'انسحب/VBD'), ('', 'من/IN'), ('', 'السباق/DTNN'), ('', 'الرئاسي/DTJJ'), ('', 'يعلن/VBP'), ('', 'تأييده/NN'), ('', 'لترامب/NN'), ('', 'التلفزيون/DTNN'), ('', 'الأردني/DTJJ'), ('', 'الاردن/DTNNP')]	['حب']	سناتور جمهور انسحب سباق رياس يعل تاييد ترامب تلفز اردن ارد		Politics		US Elections		Real
الحكـــومة الباكستانية قررت إنهاء الأزمة مع أيران	Politics	International Relations	Real		Politics	International Relations	Real	الحكـــومة الباكستانية قررت إنهاء الأزمة مع أيران	[('', 'الحكـــومة/DTNN'), ('', 'الباكستانية/DTJJ'), ('', 'قررت/VBD'), ('', 'إنهاء/NN'), ('', 'الأزمة/DTNN'), ('', 'مع/NN'), ('', 'أيران/NNS'), ('', 'التلفزيون/DTNN'), ('', 'الأردني/DTJJ'), ('', 'الاردن/DTNNP')]	['No Emotion Detected']	حكوم باكستان قرر انهاء ازم ايرا تلفز اردن ارد		Politics		International Relations		Real
مجموعة شحن فرنسية تحول مسار مزيد من السفن	Economy	International	Real		Economy	International	Real	مجموعة شحن فرنسية تحول مسار مزيد من السفن	[('', 'مجموعة/NN'), ('', 'شحن/NN'), ('', 'فرنسية/JJ'), ('', 'تحول/VBD'), ('', 'مسار/NN'), ('', 'مزيد/NN'), ('', 'من/IN'), ('', 'السفن/DTNN'), ('', 'التلفزيون/DTNN'), ('', 'الأردني/DTJJ'), ('', 'الاردن/DTNNP')]	['Conflicting Emotions Detected']	مجموع شحن رنس تحول مسار مزيد سفن تلفز اردن ارد		Economy		International		Real
الجيش الأميركي نفذنا ضربات ضد صواريخ حوثية مضادة للسفن	Military	USA issues	Real		Military	USA issues	Real	الجيش الأميركي نفذنا ضربات ضد صواريخ حوثية مضادة للسفن	[('', 'الجيش/DTNN'), ('', 'الأميركي/DTJJ'), ('', 'نفذنا/VBD'), ('', 'ضربات/NNS'), ('', 'ضد/NN'), ('', 'صواريخ/NN'), ('', 'حوثية/JJ'), ('', 'مضادة/JJ'), ('', 'للسفن/NN'), ('', 'التلفزيون/DTNN'), ('', 'الأردني/DTJJ'), ('', 'الاردن/DTNNP')]	['No Emotion Detected']	جيش اميرك نفذ ضرب ضد صواريخ حوث مضاد سفن تلفز اردن ارد		Military		USA issues		Real
البنتاغون يعلن عن تحطم مسيرة أميركية في العراق	Military	USA issues	Real		Military	USA issues	Real	البنتاغون يعلن عن تحطم مسيرة أميركية في العراق	[('', 'البنتاغون/DTNNP'), ('', 'يعلن/VBP'), ('', 'عن/IN'), ('', 'تحطم/NN'), ('', 'مسيرة/NN'), ('', 'أميركية/JJ'), ('', 'في/IN'), ('', 'العراق/DTNNP'), ('', 'التلفزيون/DTNN'), ('', 'الأردني/DTJJ'), ('', 'الاردن/DTNNP')]	['حزن']	بنتاغ يعل تحطم مسير اميرك عراق تلفز اردن ارد		Military		USA issues		Real
مسؤولة أممية إسرائيل انتهكت القانون الدولي بقصفها العنيف لغزة	Politics	Israeli-Palestinian Conflict	Real		Law	International	Real	مسؤولة أممية إسرائيل انتهكت القانون الدولي بقصفها العنيف لغزة	[('', 'مسؤولة/NN'), ('', 'أممية/JJ'), ('', 'إسرائيل/NN'), ('', 'انتهكت/VBD'), ('', 'القانون/DTNN'), ('', 'الدولي/DTJJ'), ('', 'بقصفها/NNP'), ('', 'العنيف/DTJJ'), ('', 'لغزة/NN'), ('', 'التلفزيون/DTNN'), ('', 'الأردني/DTJJ'), ('', 'الاردن/DTNNP')]	['مفاجأه']	مسوول امم اسراييل انته قان دول قصف عنيف لغز تلفز اردن ارد		Politics		Israeli-Palestinian Conflict		Real
اتصال هاتفي د منذر الحورات محلل سياسي	Media	Analysis	Real		Media	Analysis	Real	اتصال هاتفي د منذر الحورات محلل سياسي	[('', 'اتصال/NN'), ('', 'هاتفي/JJ'), ('', 'د/NN'), ('', 'منذر/NNP'), ('', 'الحورات/DTNNS'), ('', 'محلل/NN'), ('', 'سياسي/JJ'), ('', 'التلفزيون/DTNN'), ('', 'الأردني/DTJJ'), ('', 'الاردن/DTNNP')]	['حزن']	اتصال هاتف منذر حور محلل سياس تلفز اردن ارد		Media		Analysis		Real
مقتل قائد استخبارات فيلق القدس ونائبه بغارة لإسرائيلية على دمشق	Politics	Israeli-Palestinian Conflict	Real		Politics	Israeli-Palestinian Conflict	Real	مقتل قائد استخبارات فيلق القدس ونائبه بغارة لإسرائيلية على دمشق	[('', 'مقتل/NN'), ('', 'قائد/NN'), ('', 'استخبارات/NNS'), ('', 'فيلق/NN'), ('', 'القدس/DTNNP'), ('', 'ونائبه/NNP'), ('', 'بغارة/NNP'), ('', 'لإسرائيلية/NNP'), ('', 'على/IN'), ('', 'دمشق/NNP'), ('', 'التلفزيون/DTNN'), ('', 'الأردني/DTJJ'), ('', 'الاردن/DTNNP')]	['حزن']	مقتل قايد استخبار يلق قدس نايب غار اسراييل دمشق تلفز اردن ارد		Politics		Israeli-Palestinian Conflict		Real
التعادل يحسم مواجهة النشامى وكوريا الجنوبية ضمن منافسات كأس آسيا عاجل معك يالنشمي	Sports	Football	Real		Sports	Football	Real	التعادل يحسم مواجهة النشامى وكوريا الجنوبية ضمن منافسات كأس آسيا عاجل معك يالنشمي	[('', 'التعادل/DTNN'), ('', 'يحسم/VBN'), ('', 'مواجهة/NN'), ('', 'النشامى/DTNN'), ('', 'وكوريا/NNP'), ('', 'الجنوبية/DTJJ'), ('', 'ضمن/NN'), ('', 'منافسات/NNS'), ('', 'كأس/NN'), ('', 'آسيا/JJ'), ('', 'عاجل/JJ'), ('', 'التلفزيون/DTNN'), ('', 'الأردني/DTJJ'), ('', 'معك/NN'), ('', 'يالنشمي/NNP')]	['حزن']	تعادل يحسم مواجه نشامى كور جنوب ضمن منافس كاس اس عاجل تلفز اردن معك يالنشم		Sports		Football		Real
الادعاء السويسري شكاوى جنائية ضد رئيس إسرائيل خلال مشاركتة في منتدى دافوس	Politics	Israeli-Palestinian Conflict	Real		Politics	Israeli-Palestinian Conflict	Real	الادعاء السويسري شكاوى جنائية ضد رئيس إسرائيل خلال مشاركتة في منتدى دافوس	[('', 'الادعاء/DTNN'), ('', 'السويسري/DTJJ'), ('', 'شكاوى/NN'), ('', 'جنائية/JJ'), ('', 'ضد/NN'), ('', 'رئيس/NN'), ('', 'إسرائيل/NN'), ('', 'خلال/NN'), ('', 'مشاركتة/NN'), ('', 'في/IN'), ('', 'منتدى/NN'), ('', 'دافوس/NNP'), ('', 'التلفزيون/DTNN'), ('', 'الأردني/DTJJ'), ('', 'الاردن/DTNNP')]	['خوف']	ادعاء سويسر شكاوى جناء ضد رييس اسراييل خلال مشاركت منتدى دافوس تلفز اردن ارد		Politics		Israeli-Palestinian Conflict		Real
اتساع الخلافات داخل الحكومة الإسرائيلية ومجلس الحرب	Politics	International	Real		Politics	International	Real	اتساع الخلافات داخل الحكومة الإسرائيلية ومجلس الحرب	[('', 'اتساع/NN'), ('', 'الخلافات/DTNNS'), ('', 'داخل/NN'), ('', 'الحكومة/DTNN'), ('', 'الإسرائيلية/DTJJ'), ('', 'ومجلس/NN'), ('', 'الحرب/DTNN'), ('', 'التلفزيون/DTNN'), ('', 'الأردني/DTJJ'), ('', 'الاردن/DTNNP')]	['No Emotion Detected']	اتساع خلاف داخل حكوم اسراييل مجلس حرب تلفز اردن ارد		Politics		International		Real
التعادل يحسم مواجهة النشامى وكوريا الجنوبية ضمن منافسات كأس آسيا معك يالنشمي	Sports	Football	Real		Sports	Football	Real	التعادل يحسم مواجهة النشامى وكوريا الجنوبية ضمن منافسات كأس آسيا معك يالنشمي	[('', 'التعادل/DTNN'), ('', 'يحسم/VBN'), ('', 'مواجهة/NN'), ('', 'النشامى/DTNN'), ('', 'وكوريا/NNP'), ('', 'الجنوبية/DTJJ'), ('', 'ضمن/NN'), ('', 'منافسات/NNS'), ('', 'كأس/VBD'), ('', 'آسيا/NN'), ('', 'التلفزيون/DTNN'), ('', 'الأردني/DTJJ'), ('', 'معك/NN'), ('', 'يالنشمي/NNP')]	['حزن']	تعادل يحسم مواجه نشامى كور جنوب ضمن منافس كاس اس تلفز اردن معك يالنشم		Sports		Football		Real
الحـــرب على غزة المقاومة تتصدى لمحاولات الاحتلال التقدم شرق جباليا تقرير محمد المومني الارن	Politics	Israeli-Palestinian Conflict	Real		Politics	Israeli-Palestinian Conflict	Real	الحـــرب على غزة المقاومة تتصدى لمحاولات الاحتلال التقدم شرق جباليا تقرير محمد المومني الارن	[('', 'الحـــرب/DTNN'), ('', 'على/IN'), ('', 'غزة/NNP'), ('', 'المقاومة/DTNN'), ('', 'تتصدى/VBP'), ('', 'لمحاولات/NNS'), ('', 'الاحتلال/DTNN'), ('', 'التقدم/DTNN'), ('', 'شرق/NN'), ('', 'جباليا/NNP'), ('', 'تقرير/NN'), ('', 'محمد/NNP'), ('', 'المومني/DTNNP'), ('', 'التلفزيون/DTNN'), ('', 'الأردني/DTJJ'), ('', 'الارن/DTNN')]	['اشمئزاز']	حرب غز مقاوم تتصدى محاول احتلال تقدم شرق جبال تقرير محمد مومن تلفز اردن ارن		Politics		Israeli-Palestinian Conflict		Real
مقتل جندي إسرائيلي متأثرا بجروحه بمعارك غزة	Politics	Israeli-Palestinian Conflict	Real		Politics	Israeli-Palestinian Conflict	Real	مقتل جندي إسرائيلي متأثرا بجروحه بمعارك غزة	[('', 'مقتل/NN'), ('', 'جندي/NN'), ('', 'إسرائيلي/JJ'), ('', 'متأثرا/JJ'), ('', 'بجروحه/NN'), ('', 'بمعارك/NNP'), ('', 'غزة/NNP'), ('', 'التلفزيون/DTNN'), ('', 'الأردني/DTJJ'), ('', 'الاردن/DTNNP')]	['Conflicting Emotions Detected']	مقتل جند اسراييل متاثر جروح معار غز تلفز اردن ارد		Politics		Israeli-Palestinian Conflict		Real
الديمقراطيون يضغطون على بايدن بفداحة الخسائر البشرية بحملة إسرائيل على غزة	Politics	Israeli-Palestinian Conflict	Real		Politics	Israeli-Palestinian Conflict	Real	الديمقراطيون يضغطون على بايدن بفداحة الخسائر البشرية بحملة إسرائيل على غزة	[('', 'الديمقراطيون/DTNNS'), ('', 'يضغطون/VBP'), ('', 'على/IN'), ('', 'بايدن/NN'), ('', 'بفداحة/NN'), ('', 'الخسائر/DTNN'), ('', 'البشرية/DTJJ'), ('', 'بحملة/NN'), ('', 'إسرائيل/NN'), ('', 'على/IN'), ('', 'غزة/NNP'), ('', 'التلفزيون/DTNN'), ('', 'الأردني/DTJJ'), ('', 'الاردن/DTNNP')]	['اشمئزاز']	ديمقراط يضغط ايد فداح خساير بشر حمل اسراييل غز تلفز اردن ارد		Politics		Israeli-Palestinian Conflict		Real
المنتخب الوطني يتقدم على كوريا الجنوبية بهدفين مقابل هدف بعد انتهاء الشوط الأول عاجل معك يالنشمي	Sports	Football	Real		Sports	Football	Real	المنتخب الوطني يتقدم على كوريا الجنوبية بهدفين مقابل هدف بعد انتهاء الشوط الأول عاجل معك يالنشمي	[('', 'المنتخب/DTNN'), ('', 'الوطني/DTJJ'), ('', 'يتقدم/VBP'), ('', 'على/IN'), ('', 'كوريا/NNP'), ('', 'الجنوبية/DTJJ'), ('', 'بهدفين/NNP'), ('', 'مقابل/NN'), ('', 'هدف/NN'), ('', 'بعد/NN'), ('', 'انتهاء/NN'), ('', 'الشوط/DTNN'), ('', 'الأول/DTNNP'), ('', 'عاجل/JJ'), ('', 'التلفزيون/DTNN'), ('', 'الأردني/DTJJ'), ('', 'معك/NN'), ('', 'يالنشمي/NNP')]	['No Emotion Detected']	منتخب وطن يتقدم كور جنوب هدف مقابل هدف انتهاء شوط اول عاجل تلفز اردن معك يالنشم		Sports		Football		Real
نـشـرة أخبار الثالثة السبت	Media	News	Real		Media	News	Real	نـشـرة أخبار الثالثة السبت	[('', 'نـشـرة/NN'), ('', 'أخبار/NN'), ('الثالثة/ADJ', 'NUM'), ('', 'السبت/DTNN'), ('', 'التلفزيون/DTNN'), ('', 'الأردني/DTJJ')]	['No Emotion Detected']	نشر اخبار ثالث الس تلفز اردن		Media		News		Real
الاحتلال يقتحم مدينة يطا جنوب الخليل اتصال هاتفي مراسلة نوال حجازي	Politics	Israeli-Palestinian Conflict	Real		Politics	Israeli-Palestinian Conflict	Real	الاحتلال يقتحم مدينة يطا جنوب الخليل اتصال هاتفي مراسلة نوال حجازي	[('', 'الاحتلال/DTNN'), ('', 'يقتحم/VBP'), ('', 'مدينة/NN'), ('', 'يطا/NNP'), ('', 'جنوب/NN'), ('', 'الخليل/DTNNP'), ('', 'اتصال/NN'), ('', 'هاتفي/JJ'), ('', 'مراسلة/NN'), ('', 'التلفزيون/DTNN'), ('', 'الأردني/DTJJ'), ('', 'نوال/NNP'), ('', 'حجازي/NNP')]	['No Emotion Detected']	احتلال يقتحم مدين يطا جنوب خليل اتصال هاتف مراسل تلفز اردن نوال حجاز		Politics		Israeli-Palestinian Conflict		Real
قوات الاحتلال تنفذ حملة اقتحامات واعتقالات في الضفة الغربية	Politics	Israeli-Palestinian Conflict	Real		Politics	Israeli-Palestinian Conflict	Real	قوات الاحتلال تنفذ حملة اقتحامات واعتقالات في الضفة الغربية	[('', 'قوات/NNS'), ('', 'الاحتلال/DTNN'), ('', 'تنفذ/VBP'), ('', 'حملة/NN'), ('', 'اقتحامات/NNS'), ('', 'واعتقالات/JJ'), ('', 'في/IN'), ('', 'الضفة/DTNNP'), ('', 'الغربية/DTJJ'), ('', 'التلفزيون/DTNN'), ('', 'الأردني/DTJJ')]	['No Emotion Detected']	قوا احتلال تنفذ حمل اقتحام واعتقال الضف غرب تلفز اردن		Politics		Israeli-Palestinian Conflict		Real
حريق ضخم في سكن داخلي بمدرسة ابتدائية في الصين يودي بحياة طفلا	Society	International	Real		Environment	International	Real	حريق ضخم في سكن داخلي بمدرسة ابتدائية في الصين يودي بحياة طفلا	[('', 'حريق/NN'), ('', 'ضخم/JJ'), ('', 'في/IN'), ('', 'سكن/NN'), ('', 'داخلي/JJ'), ('', 'بمدرسة/JJ'), ('', 'ابتدائية/JJ'), ('', 'في/IN'), ('', 'الصين/DTNNP'), ('', 'يودي/VBP'), ('', 'بحياة/NN'), ('', 'طفلا/NN'), ('', 'التلفزيون/DTNN'), ('', 'الأردني/DTJJ')]	['مفاجأه']	حريق ضخم سكن داخل مدرس ابتداء صين يود حيا طفل تلفز اردن		Society		International		Real
الأردن يعزي بضحايا حريق مدرسة في الصين	Society	International	Real		Society	International	Real	الأردن يعزي بضحايا حريق مدرسة في الصين	[('', 'الأردن/DTNN'), ('', 'يعزي/VBP'), ('', 'بضحايا/NN'), ('', 'حريق/NN'), ('', 'مدرسة/NN'), ('', 'في/IN'), ('', 'الصين/DTNNP')]	['No Emotion Detected']	ارد يعز ضحا حريق مدرس صين		Society		International		Real
اتساع الخلافات داخل الحكومة الإسرائيلية ومجلس الحرب اتصال هاتفي د مازن الحوامدة أستاذ العلوم السياسية	Politics	Israeli-Palestinian Conflict	Real		Politics	Israeli-Palestinian Conflict	Real	اتساع الخلافات داخل الحكومة الإسرائيلية ومجلس الحرب اتصال هاتفي د مازن الحوامدة أستاذ العلوم السياسية	[('', 'اتساع/NN'), ('', 'الخلافات/DTNNS'), ('', 'داخل/NN'), ('', 'الحكومة/DTNN'), ('', 'الإسرائيلية/DTJJ'), ('', 'ومجلس/NN'), ('', 'الحرب/DTNN'), ('', 'اتصال/NN'), ('', 'هاتفي/JJ'), ('', 'د/NN'), ('', 'مازن/NNP'), ('', 'الحوامدة/DTNN'), ('', 'أستاذ/NN'), ('', 'العلوم/DTNN'), ('', 'السياسية/DTJJ'), ('', 'التلفزيون/DTNN'), ('', 'الأردني/DTJJ')]	['حزن']	اتساع خلاف داخل حكوم اسراييل مجلس حرب اتصال هاتف ماز حوامد استاذ علوم سياس تلفز اردن		Politics		Israeli-Palestinian Conflict		Real
اليونيسيف ألف طفل ولدوا في جحيم الحرب على غزة	Humanitarian	Israeli-Palestinian Conflict	Real		Humanitarian	Israeli-Palestinian Conflict	Real	اليونيسيف ألف طفل ولدوا في جحيم الحرب على غزة	[('', 'اليونيسيف/DTNN'), ('', 'ألف/VBD'), ('', 'طفل/NN'), ('', 'ولدوا/VBN'), ('', 'في/IN'), ('', 'جحيم/NN'), ('', 'الحرب/DTNN'), ('', 'على/IN'), ('', 'غزة/NNP'), ('', 'التلفزيون/DTNN'), ('', 'الأردني/DTJJ')]	['حزن']	يونيسيف طفل لدو جحيم حرب غز تلفز اردن		Humanitarian		Israeli-Palestinian Conflict		Real
الصحة العالمية تحذر من انتشار مرض التهاب الكبد بقطاع غزة	Health	Crisis	Real		Health	Crisis	Real	الصحة العالمية تحذر من انتشار مرض التهاب الكبد بقطاع غزة	[('', 'الصحة/DTNN'), ('', 'العالمية/DTJJ'), ('', 'تحذر/VBP'), ('', 'من/IN'), ('', 'انتشار/NN'), ('', 'مرض/NN'), ('', 'التهاب/NN'), ('', 'الكبد/DTNN'), ('', 'بقطاع/NNP'), ('', 'غزة/NNP'), ('', 'التلفزيون/DTNN'), ('', 'الأردني/DTJJ')]	['No Emotion Detected']	الصح عالم تحذر انتشار مرض تهاب كبد قطاع غز تلفز اردن		Health		Crisis		Real
الرئيس الأميركي نتنياهو لا يعارض حل الدولتين	Military	USA issues	Real		Military	USA issues	Real	الرئيس الأميركي نتنياهو لا يعارض حل الدولتين	[('', 'الرئيس/DTNN'), ('', 'الأميركي/DTJJ'), ('', 'نتنياهو/NNP'), ('', 'لا/RP'), ('', 'يعارض/VBP'), ('', 'حل/NN'), ('', 'الدولتين/DTNNS'), ('', 'التلفزيون/DTNN'), ('', 'الأردني/DTJJ')]	['غضب']	رييس اميرك نتن يعارض حل دولت تلفز اردن		Military		USA issues		Real
رئيس النقابة اللوجستية الأردنية تغير مسارات البواخر من باب المندب إلى رأس الرجاء الصالح يترتب عليه كلفا زائدة إضافة إلى تأخير وصول البضائع لمدة لا تقل عن اسابيع كحد أدنى	Economy	Financial Policies	Real		Economy	Financial Policies	Real	رئيس النقابة اللوجستية الأردنية تغير مسارات البواخر من باب المندب إلى رأس الرجاء الصالح يترتب عليه كلفا زائدة إضافة إلى تأخير وصول البضائع لمدة لا تقل عن اسابيع كحد أدنى	[('', 'رئيس/NN'), ('', 'النقابة/DTNN'), ('', 'اللوجستية/DTJJ'), ('', 'الأردنية/DTJJ'), ('', 'تغير/VBP'), ('', 'مسارات/NNS'), ('', 'البواخر/DTNN'), ('', 'من/IN'), ('', 'باب/NN'), ('', 'المندب/DTNN'), ('', 'إلى/VBD'), ('', 'رأس/NN'), ('', 'الرجاء/DTNN'), ('', 'الصالح/DTJJ'), ('', 'يترتب/VBP'), ('', 'عليه/NNP'), ('', 'كلفا/NNP'), ('', 'زائدة/NN'), ('', 'إضافة/NN'), ('', 'إلى/VBD'), ('', 'تأخير/NN'),…	['Conflicting Emotions Detected']	رييس نقاب لوجست اردن تغير مسار بواخر باب مندب راس رجاء صالح يترتب كلف زايد اضاف تاخير صول بضايع لمد تقل اسابيع كحد ادنى تلفز اردن		Economy		Financial Policies		Real
وزارة الصحة في غزة ارتفاع حصيلة الشهداء والجرحى جراء العدوان الإسرائيلي على قطاع غزة إلى شهيدا و مصابا	Health	Israeli-Palestinian Conflict	Real		Health	Israeli-Palestinian Conflict	Real	وزارة الصحة في غزة ارتفاع حصيلة الشهداء والجرحى جراء العدوان الإسرائيلي على قطاع غزة إلى شهيدا و مصابا	[('', 'وزارة/NN'), ('', 'الصحة/DTNN'), ('', 'في/IN'), ('', 'غزة/NNP'), ('', 'ارتفاع/NN'), ('', 'حصيلة/NN'), ('', 'الشهداء/DTNN'), ('', 'والجرحى/NN'), ('', 'جراء/NN'), ('', 'العدوان/DTNN'), ('', 'الإسرائيلي/DTJJ'), ('', 'على/IN'), ('', 'قطاع/NN'), ('', 'غزة/NNP'), ('', 'إلى/VBD'), ('', 'شهيدا/JJ'), ('', 'و/CC'), ('', 'مصابا/NN'), ('', 'التلفزيون/DTNN'), ('', 'الأردني/DTJJ')]	['حزن']	زار الصح غز ارتفاع حصيل شهداء جرحى جراء عدو اسراييل قطاع غز شهيد مصاب تلفز اردن		Health		Israeli-Palestinian Conflict		Real
الجامعة العربية تعقد دورة غير عادية لبحث التعامل مع الجرائم الإسرائيلية	Politics	Israeli-Palestinian Conflict	Real		Politics	Israeli-Palestinian Conflict	Real	الجامعة العربية تعقد دورة غير عادية لبحث التعامل مع الجرائم الإسرائيلية	[('', 'الجامعة/DTNN'), ('', 'العربية/DTJJ'), ('', 'تعقد/VBP'), ('', 'دورة/NN'), ('', 'غير/NN'), ('', 'عادية/JJ'), ('', 'لبحث/NN'), ('', 'التعامل/DTNN'), ('', 'مع/NN'), ('', 'الجرائم/DTNN'), ('', 'الإسرائيلية/DTJJ'), ('', 'التلفزيون/DTNN'), ('', 'الأردني/DTJJ')]	['غضب']	جامع عرب تعقد دور عاد لبحث تعامل جرايم اسراييل تلفز اردن		Politics		Israeli-Palestinian Conflict		Real
نـشـرة أخــبار منتصف النهار السبت	Media	News	Real		Media	News	Real	نـشـرة أخــبار منتصف النهار السبت	[('', 'نـشـرة/NN'), ('', 'أخــبار/NN'), ('', 'منتصف/NN'), ('', 'النهار/DTNNP'), ('', 'السبت/DTNN'), ('', 'التلفزيون/DTNN'), ('', 'الأردني/DTJJ')]	['No Emotion Detected']	نشر اخبار منتصف نهار الس تلفز اردن		Media		News		Real
هجوم يستهدف مبنى سكنيا في حي المزة بدمشق ناجم عن عدوان إسرائيلي دمشق سوريا	Military	International	Real		Politics	International	Real	هجوم يستهدف مبنى سكنيا في حي المزة بدمشق ناجم عن عدوان إسرائيلي دمشق سوريا	[('', 'هجوم/NN'), ('', 'يستهدف/VBP'), ('', 'مبنى/NN'), ('', 'سكنيا/JJ'), ('', 'في/IN'), ('', 'حي/NN'), ('', 'المزة/VN'), ('', 'بدمشق/NN'), ('', 'ناجم/JJ'), ('', 'عن/IN'), ('', 'عدوان/NN'), ('', 'إسرائيلي/NNS'), ('', 'دمشق/NNP'), ('', 'سوريا/NNP'), ('', 'التلفزيون/DTNN'), ('', 'الأردني/DTJJ')]	['اشمئزاز']	هجوم يستهدف مبنى سكن حي المز دمشق ناجم عدوا اسراييل دمشق سور تلفز اردن		Military		International		Real
الأردن كوريا الجنوبية نهائيات كأس آسيا الساعة مساء بتوقيت الأردن الملعب ستاد الثمامة الدوحة معك يالنشمي الأردن	Sports	Football	Real		Sports	Football	Real	الأردن كوريا الجنوبية نهائيات كأس آسيا الساعة مساء بتوقيت الأردن الملعب ستاد الثمامة الدوحة معك يالنشمي الأردن	[('', 'الأردن/DTNN'), ('', 'كوريا/NNP'), ('', 'الجنوبية/DTJJ'), ('', 'نهائيات/NNS'), ('', 'كأس/NN'), ('', 'آسيا/JJ'), ('', 'الساعة/DTNN'), ('', 'مساء/NN'), ('', 'بتوقيت/NNP'), ('', 'الأردن/DTNNP'), ('', 'الملعب/DTNN'), ('', 'ستاد/NN'), ('', 'الثمامة/DTNN'), ('', 'الدوحة/DTNNP'), ('', 'معك/VBD'), ('', 'يالنشمي/NNP'), ('', 'التلفزيون/DTNN'), ('', 'الأردني/DTJJ'), ('', 'الأردن/DTJJ')]	['حزن']	ارد كور جنوب نهاء كاس اس ساع توق ارد ملعب ستاد ثمام دوح معك يالنشم تلفز اردن ارد		Sports		Football		Real
مطبخ يوم جديد الـسبت يوم جديد	Media	TV Show	Real		Media	Cook	Real	مطبخ يوم جديد الـسبت يوم جديد	[('', 'مطبخ/NN'), ('', 'يوم/NN'), ('', 'جديد/JJ'), ('', 'الـسبت/DTNN'), ('', 'يوم/NN'), ('', 'جديد/JJ'), ('', 'التلفزيون/DTNN'), ('', 'الأردني/DTJJ')]	['No Emotion Detected']	مطبخ يوم جديد الس يوم جديد تلفز اردن		Media		TV Show		Real
مدير عام المؤسسة الاستهلاكية المدنية المؤسسة تمتلك مخزوناً استراتيجياً آمناً يكفي لنحو سبعة أشهر مقبلة	Economy	Local	Real		Economy	Local	Real	مدير عام المؤسسة الاستهلاكية المدنية المؤسسة تمتلك مخزوناً استراتيجياً آمناً يكفي لنحو سبعة أشهر مقبلة	[('', 'مدير/NN'), ('', 'عام/NN'), ('', 'المؤسسة/DTNN'), ('', 'الاستهلاكية/DTJJ'), ('', 'المدنية/DTJJ'), ('', 'المؤسسة/DTNN'), ('', 'تمتلك/VBP'), ('', 'مخزونا/NN'), ('', 'استراتيجيا/JJ'), ('', 'آمنا/VBD'), ('', 'يكفي/VBP'), ('', 'لنحو/NNP'), ('', 'سبعة/CD'), ('', 'أشهر/NN'), ('', 'مقبلة/JJ'), ('', 'التلفزيون/DTNN'), ('', 'الأردني/DTJJ')]	['No Emotion Detected']	مدير عام موسس استهلاك مدن موسس تمتل مخز استراتيج امن يكف لنح اشهر مقبل تلفز اردن		Economy		Local		Real
رئيس الوزراء القصف الإسرائيلي لـ غزة يستوفي كل مواصفات جرائم الحرب	Politics	Israeli-Palestinian Conflict	Real		Politics	Israeli-Palestinian Conflict	Real	رئيس الوزراء القصف الإسرائيلي لـ غزة يستوفي كل مواصفات جرائم الحرب	[('', 'رئيس/NN'), ('', 'الوزراء/DTNN'), ('', 'القصف/DTNN'), ('', 'الإسرائيلي/DTJJ'), ('', 'لـ/NN'), ('', 'غزة/NNP'), ('', 'يستوفي/VBP'), ('كل/NOUN', 'QUANT'), ('', 'مواصفات/NNS'), ('', 'جرائم/NN'), ('', 'الحرب/DTNN'), ('', 'التلفزيون/DTNN'), ('', 'الأردني/DTJJ')]	['غضب']	رييس وزراء قصف اسراييل ل غز يستوف مواصف جرايم حرب تلفز اردن		Politics		Israeli-Palestinian Conflict		Real
أجواء لطيفة في أغلب المناطق حتى الإثنين وانخفاض ملموس الثلاثاء الطقس الا ردن	Weather	Forecast	Real		Weather	Forecast	Real	أجواء لطيفة في أغلب المناطق حتى الإثنين وانخفاض ملموس الثلاثاء الطقس الا ردن	[('', 'أجواء/NN'), ('', 'لطيفة/JJ'), ('', 'في/IN'), ('', 'أغلب/NN'), ('', 'المناطق/DTNN'), ('', 'حتى/IN'), ('', 'الإثنين/DTNNS'), ('', 'وانخفاض/NN'), ('', 'ملموس/JJ'), ('', 'الثلاثاء/DTNN'), ('', 'الطقس/DTNN'), ('', 'التلفزيون/DTNN'), ('', 'الأردني/DTJJ'), ('', 'الا/RP'), ('', 'ردن/NN')]	['Conflicting Emotions Detected']	اجواء لطيف اغلب مناطق اثن وانخفاض ملموس ثلاثاء طقس تلفز اردن الا ردن		Weather		Forecast		Real
البيت الأبيض بايدن يبحث هاتفيا مع نتنياهو ضرورة إقامة الدولة الفلسطينية الأردن	Politics	International Relations	Real		Politics	Israeli-Palestinian Conflict	Real	البيت الأبيض بايدن يبحث هاتفيا مع نتنياهو ضرورة إقامة الدولة الفلسطينية الأردن	[('', 'البيت/DTNN'), ('', 'الأبيض/DTJJ'), ('', 'بايدن/NNP'), ('', 'يبحث/VBP'), ('', 'هاتفيا/JJ'), ('', 'مع/NN'), ('', 'نتنياهو/NNP'), ('', 'ضرورة/NN'), ('', 'إقامة/NN'), ('', 'الدولة/DTNN'), ('', 'الفلسطينية/DTJJ'), ('', 'التلفزيون/DTNN'), ('', 'الأردني/DTJJ'), ('', 'الأردن/DTJJ')]	['اشمئزاز']	الب ابيض ايد يبحث هاتف نتن ضرور اقام دول فلسطين تلفز اردن ارد		Politics		International Relations		Real
نشرة الأخبار الجمعة	Media	News	Real		Media	News	Real	نشرة الأخبار الجمعة	[('', 'نشرة/NN'), ('', 'الأخبار/DTNN'), ('', 'الجمعة/DTNN'), ('', 'الأردن/DTJJ'), ('', 'التلفزيون/DTNN'), ('', 'الأردني/DTJJ')]	['اشمئزاز']	نشر اخبار جمع ارد تلفز اردن		Media		News		Real
العواملة حزب الميثاق افرد للشباب مساحة كبيرة داخل الحزب ابراهيم العواملة عضو في حزب الميثاق الوطني شباب وأحزاب الأردن	Politics	Youth Empowerment	Real		Politics	Youth Empowerment	Real	العواملة حزب الميثاق افرد للشباب مساحة كبيرة داخل الحزب ابراهيم العواملة عضو في حزب الميثاق الوطني شباب وأحزاب الأردن	[('', 'العواملة/DTNN'), ('', 'حزب/NN'), ('', 'الميثاق/DTNN'), ('', 'افرد/VBD'), ('', 'للشباب/NN'), ('', 'مساحة/NN'), ('', 'كبيرة/JJ'), ('', 'داخل/NN'), ('', 'الحزب/DTNN'), ('', 'ابراهيم/NNP'), ('', 'العواملة/DTNNP'), ('', 'عضو/NN'), ('', 'في/IN'), ('', 'حزب/NN'), ('', 'الميثاق/DTNN'), ('', 'الوطني/DTJJ'), ('', 'شباب/NN'), ('', 'وأحزاب/NN'), ('', 'الأردن/DTNN'), ('', 'التلفزيون/DTNN'), ('', 'الأرد…	['No Emotion Detected']	عوامل حزب ميثاق افرد شباب مساح كبير داخل حزب ابراهيم عوامل عضو حزب ميثاق وطن شباب احزاب ارد تلفز اردن		Politics		Youth Empowerment		Real
نسرين حزب الميثاق يرى في الشباب المستقبل نسرين يوسف عضو في حزب الميثاق الوطني شباب وأحزاب الأردن	Politics	Youth Empowerment	Real		Politics	Youth Empowerment	Real	نسرين حزب الميثاق يرى في الشباب المستقبل نسرين يوسف عضو في حزب الميثاق الوطني شباب وأحزاب الأردن	[('', 'نسرين/NNP'), ('', 'حزب/NN'), ('', 'الميثاق/DTNN'), ('', 'يرى/VBP'), ('', 'في/IN'), ('', 'الشباب/DTNN'), ('', 'المستقبل/DTNN'), ('', 'نسرين/NNP'), ('', 'يوسف/NNP'), ('', 'عضو/NN'), ('', 'في/IN'), ('', 'حزب/NN'), ('', 'الميثاق/DTNN'), ('', 'الوطني/DTJJ'), ('', 'شباب/NN'), ('', 'وأحزاب/NN'), ('', 'الأردن/DTNN'), ('', 'التلفزيون/DTNN'), ('', 'الأردني/DTJJ')]	['No Emotion Detected']	نسر حزب ميثاق يرى شباب مستقبل نسر يوسف عضو حزب ميثاق وطن شباب احزاب ارد تلفز اردن		Politics		Youth Empowerment		Real
المومني أي حزب يريد أن ينجح لابد أن يقدم الشباب د محمد المومني أمين عام حزب الميثاق الوطني شباب وأحزاب الأردن	Politics	Youth Empowerment	Real		Politics	Youth Empowerment	Real	المومني أي حزب يريد أن ينجح لابد أن يقدم الشباب د محمد المومني أمين عام حزب الميثاق الوطني شباب وأحزاب الأردن	[('', 'المومني/DTNNP'), ('', 'أي/VB'), ('', 'حزب/NN'), ('', 'يريد/VBP'), ('', 'أن/NN'), ('', 'ينجح/VBP'), ('', 'لابد/NN'), ('', 'أن/NN'), ('', 'يقدم/VBP'), ('', 'الشباب/DTNN'), ('', 'د/NN'), ('', 'محمد/NNP'), ('', 'المومني/DTNNP'), ('', 'أمين/VBD'), ('', 'عام/NN'), ('', 'حزب/NN'), ('', 'الميثاق/DTNN'), ('', 'الوطني/DTJJ'), ('', 'شباب/NN'), ('', 'وأحزاب/NN'), ('', 'الأردن/DTNN'), ('', 'التلفزيون/D…	['No Emotion Detected']	مومن حزب يريد ينجح لابد يقدم شباب محمد مومن ام عام حزب ميثاق وطن شباب احزاب ارد تلفز اردن		Politics		Youth Empowerment		Real
حزب الميثاق الوطني في سطور د محمد المومني أمين عام حزب الميثاق الوطني شباب وأحزاب الأردن	Politics	Local	Real		Politics	Local	Real	حزب الميثاق الوطني في سطور د محمد المومني أمين عام حزب الميثاق الوطني شباب وأحزاب الأردن	[('', 'حزب/NN'), ('', 'الميثاق/DTNN'), ('', 'الوطني/DTJJ'), ('', 'في/IN'), ('', 'سطور/NN'), ('', 'د/NN'), ('', 'محمد/NNP'), ('', 'المومني/DTNNP'), ('', 'أمين/VBD'), ('', 'عام/NN'), ('', 'حزب/NN'), ('', 'الميثاق/DTNN'), ('', 'الوطني/DTJJ'), ('', 'شباب/NN'), ('', 'وأحزاب/NN'), ('', 'الأردن/DTNN'), ('', 'التلفزيون/DTNN'), ('', 'الأردني/DTJJ')]	['No Emotion Detected']	حزب ميثاق وطن سطور محمد مومن ام عام حزب ميثاق وطن شباب احزاب ارد تلفز اردن		Politics		Local		Real
عودة الاتصالات جزئيا في قطاع غزة بعد انقطاع شامل لمدة أيام	Communication	International	Real		Communication	International	Real	عودة الاتصالات جزئيا في قطاع غزة بعد انقطاع شامل لمدة أيام	[('', 'عودة/NN'), ('', 'الاتصالات/DTNNS'), ('', 'جزئيا/JJ'), ('', 'في/IN'), ('', 'قطاع/NN'), ('', 'غزة/NNP'), ('', 'بعد/NN'), ('', 'انقطاع/NN'), ('', 'شامل/JJ'), ('', 'لمدة/NN'), ('', 'أيام/NN')]	['حب']	عود اتصال جزء قطاع غز انقطاع شامل لمد ايام		Communication		International		Real
شباب وأحزاب حزب الميثاق الوطني ضيوف الحلقة أمين عام الحزب الدكتور محمد المومني الأردن	Media	TV Show	Real		Media	TV Show	Real	شباب وأحزاب حزب الميثاق الوطني ضيوف الحلقة أمين عام الحزب الدكتور محمد المومني الأردن	[('', 'شباب/NN'), ('', 'وأحزاب/NN'), ('', 'حزب/NN'), ('', 'الميثاق/DTNN'), ('', 'الوطني/DTJJ'), ('', 'ضيوف/NN'), ('', 'الحلقة/DTNN'), ('', 'أمين/VBN'), ('', 'عام/NN'), ('', 'الحزب/DTNN'), ('', 'الدكتور/DTNN'), ('', 'محمد/NNP'), ('', 'المومني/DTNNP'), ('', 'الأردن/DTNNP'), ('', 'التلفزيون/DTNN'), ('', 'الأردني/DTJJ')]	['No Emotion Detected']	شباب احزاب حزب ميثاق وطن ضيوف حلق ام عام حزب دكتور محمد مومن ارد تلفز اردن		Media		TV Show		Real
العبادي مشروع قانون ضمان حق الحصول على المعلومات سيصنف المعلومات سرية وغير سرية د احمد العبادي عضو مجلس الأعيان الأردن ستون دقيقة	Government	Parliament	Real		Government	Parliament	Real	العبادي مشروع قانون ضمان حق الحصول على المعلومات سيصنف المعلومات سرية وغير سرية د احمد العبادي عضو مجلس الأعيان الأردن ستون دقيقة	[('', 'العبادي/DTNNP'), ('', 'مشروع/NN'), ('', 'قانون/NN'), ('', 'ضمان/NN'), ('', 'حق/NN'), ('', 'الحصول/DTNN'), ('', 'على/IN'), ('', 'المعلومات/DTNNS'), ('', 'سيصنف/NNP'), ('', 'المعلومات/DTNNS'), ('', 'سرية/JJ'), ('', 'وغير/NN'), ('', 'سرية/JJ'), ('', 'د/NN'), ('', 'احمد/NNP'), ('', 'العبادي/DTNNP'), ('', 'عضو/NN'), ('', 'مجلس/NN'), ('', 'الأعيان/DTNN'), ('', 'الأردن/DTJJ'), ('', 'التلفزيون/DTN…	['حزن']	عباد مشروع قانو ضما حق حصول معلوم سيصنف معلوم سر غير سر احمد عباد عضو مجلس الاع ارد تلفز اردن دقيق		Government		Parliament		Real
بدء فعاليات مؤتمر نموذج الأمم المتحدة في عمان	Politics	International Relations	Real		Politics	International Relations	Real	بدء فعاليات مؤتمر نموذج الأمم المتحدة في عمان	[('', 'بدء/NN'), ('', 'فعاليات/NNS'), ('', 'مؤتمر/NN'), ('', 'نموذج/NN'), ('', 'الأمم/DTNN'), ('', 'المتحدة/DTJJ'), ('', 'في/IN'), ('', 'عمان/NNP')]	['No Emotion Detected']	بدء عال موتمر نموذج امم متحد عما		Politics		International Relations		Real
ســتــون دقيقة الجمعة	Media	TV Show	Real		Media	TV Show	Real	ســتــون دقيقة الجمعة	[('', 'ســتــون/NNP'), ('', 'دقيقة/NN'), ('', 'الجمعة/DTNN'), ('', 'الأردن/DTJJ'), ('', 'التلفزيون/DTNN'), ('', 'الأردني/DTJJ')]	['No Emotion Detected']	ستو دقيق جمع ارد تلفز اردن		Media		TV Show		Real
الأشغال إعادة حركة السير أعلى الجسر القوسي ضمن تقاطع عين غزال أعلنت وزارة الأشغال العامة و الإسكان مساء اليوم الجمعة عن إعادة حركة المرور أعلى الجسر القوسي ضمن تقاطع عين غزال للسير القادم من عمان والمحطة باتجاه طبربور اعتبارا من صباح يوم غدٍ السبت ويأتي ذلك وفق بيان الوزارة عقب إنهاء أعمال الصيانة التي نفذتها الوزارة للجسر والتي شملت الخلطات الاسفلتية والعناصر الإنشائية للجسر بالإضافة إلى أعمال ا…	Traffic	Infrastructure	Real		Traffic	Infrastructure	Real	الأشغال إعادة حركة السير أعلى الجسر القوسي ضمن تقاطع عين غزال أعلنت وزارة الأشغال العامة و الإسكان مساء اليوم الجمعة عن إعادة حركة المرور أعلى الجسر القوسي ضمن تقاطع عين غزال للسير القادم من عمان والمحطة باتجاه طبربور اعتبارا من صباح يوم غدٍ السبت ويأتي ذلك وفق بيان الوزارة عقب إنهاء أعمال الصيانة التي نفذتها الوزارة للجسر والتي شملت الخلطات الاسفلتية والعناصر الإنشائية للجسر بالإضافة إلى أعمال ا…	[('', 'الأشغال/DTNN'), ('', 'إعادة/NN'), ('', 'حركة/NN'), ('', 'السير/DTNN'), ('', 'أعلى/VBD'), ('', 'الجسر/DTNN'), ('', 'القوسي/DTJJ'), ('', 'ضمن/NN'), ('', 'تقاطع/NN'), ('', 'عين/NN'), ('', 'غزال/NNP'), ('', 'أعلنت/VBD'), ('', 'وزارة/NN'), ('', 'الأشغال/DTNN'), ('', 'العامة/DTJJ'), ('', 'و/CC'), ('', 'الإسكان/DTNN'), ('', 'مساء/NN'), ('', 'اليوم/DTNN'), ('', 'الجمعة/DTNN'), ('', 'عن/IN'), ('', …	['Conflicting Emotions Detected']	اشغال اعاد حرك سير اعلى جسر قوس ضمن تقاطع غزال اعلن زار اشغال عام اسك يوم جمع اعاد حرك مرور اعلى جسر قوس ضمن تقاطع غزال سير قادم عما محط اتج طبربور اعتبار يوم غد الس ويء وفق بيا وزار عقب انهاء اعمال صيان نفذ وزار جسر وال شمل خلط اسفلت عناصر انشاء جسر اضاف اعمال سلام مرور لازم اشار ارشاد كان وزار اعلن شهر اغلاق جسر تنفيذ اعمال صيان انت المد محدد بعد ايام		Traffic		Infrastructure		Real
القسام استهدفنا مبنى تحصن به جنود الاحتلال بحي الشيخ رضوان وأطلقنا النار على جندي قربه وأصبناه مباشرة القسام استهدفنا قوة تحصنت داخل مبنى في حي الزيتون وأوقعنا أفرادها بن قتيل وجريح	Politics	Israeli-Palestinian Conflict	Real		Politics	Israeli-Palestinian Conflict	Real	القسام استهدفنا مبنى تحصن به جنود الاحتلال بحي الشيخ رضوان وأطلقنا النار على جندي قربه وأصبناه مباشرة القسام استهدفنا قوة تحصنت داخل مبنى في حي الزيتون وأوقعنا أفرادها بن قتيل وجريح	[('', 'القسام/DTNNP'), ('', 'استهدفنا/VBD'), ('', 'مبنى/NN'), ('', 'تحصن/VBP'), ('', 'به/NN'), ('', 'جنود/NN'), ('', 'الاحتلال/DTNN'), ('', 'بحي/NN'), ('', 'الشيخ/DTNN'), ('', 'رضوان/NNP'), ('', 'وأطلقنا/VBD'), ('', 'النار/DTNN'), ('', 'على/IN'), ('', 'جندي/NN'), ('', 'قربه/NN'), ('', 'وأصبناه/NN'), ('', 'مباشرة/NN'), ('', 'القسام/DTNNP'), ('', 'استهدفنا/VBD'), ('', 'قوة/NN'), ('', 'تحصنت/VBD'), …	['Conflicting Emotions Detected']	قسام استهدف مبنى تحص جنود احتلال بح شيخ رضوا اطلق نار جند قرب اصبن مباشر قسام استهدف قو تحصن داخل مبنى حي زيت اوقع افراد بن قتيل جريح		Politics		Israeli-Palestinian Conflict		Real
الخارجية الباكستانية باكستان و إيران تتفقان على خفض التصعيد واحترام سيادة كل دولة لأراضي الدولة الأخرى	Politics	International Relations	Real		Politics	International Relations	Real	الخارجية الباكستانية باكستان و إيران تتفقان على خفض التصعيد واحترام سيادة كل دولة لأراضي الدولة الأخرى	[('', 'الخارجية/DTNN'), ('', 'الباكستانية/DTJJ'), ('', 'باكستان/NNP'), ('', 'و/CC'), ('', 'إيران/NNS'), ('', 'تتفقان/VBP'), ('', 'على/IN'), ('', 'خفض/NN'), ('', 'التصعيد/DTNN'), ('', 'واحترام/NNP'), ('', 'سيادة/NN'), ('كل/NOUN', 'QUANT'), ('', 'دولة/NN'), ('', 'لأراضي/NNS'), ('', 'الدولة/DTNN'), ('', 'الأخرى/DTJJ')]	['Conflicting Emotions Detected']	خارج باكستان اكست ايرا تتفق خفض تصعيد واحترام سياد دول اراض دول اخرى		Politics		International Relations		Real
الصين أكبر مُصدّر للسيارات في العالم عام أعلنت وزارة الصناعة وتكنولوجيا المعلومات الصينية اليوم الجمعة أن الصين توجت كأكبر مُصدّر للسيارات في العالم في عام حيث صدّرت مليون سيارة وفي سياق متصل تجاوز إنتاج ومبيعات مركبات الطاقة الجديدة مليون و مليون وحدة في عام بزيادة بنسبة بالمئة ونسبة بالمئة على أساس سنوي على التوالي حسبما أظهرت بيانات أصدرتها الجمعية الصينية لمصنعي السيارات ونقلتها وكالة شينخوا …	Economy	Car	Real		Economy	Car	Real	الصين أكبر مُصدّر للسيارات في العالم عام أعلنت وزارة الصناعة وتكنولوجيا المعلومات الصينية اليوم الجمعة أن الصين توجت كأكبر مُصدّر للسيارات في العالم في عام حيث صدّرت مليون سيارة وفي سياق متصل تجاوز إنتاج ومبيعات مركبات الطاقة الجديدة مليون و مليون وحدة في عام بزيادة بنسبة بالمئة ونسبة بالمئة على أساس سنوي على التوالي حسبما أظهرت بيانات أصدرتها الجمعية الصينية لمصنعي السيارات ونقلتها وكالة شينخوا …	[('', 'الصين/DTNNP'), ('', 'أكبر/VBD'), ('', 'مصدر/NN'), ('', 'للسيارات/NNS'), ('', 'في/IN'), ('', 'العالم/DTNN'), ('', 'عام/NN'), ('', 'أعلنت/NN'), ('', 'وزارة/NN'), ('', 'الصناعة/DTNN'), ('', 'وتكنولوجيا/NN'), ('', 'المعلومات/DTNNS'), ('', 'الصينية/DTJJ'), ('', 'اليوم/DTNN'), ('', 'الجمعة/DTNN'), ('', 'أن/NN'), ('', 'الصين/DTNNP'), ('', 'توجت/VBN'), ('', 'كأكبر/NN'), ('', 'مصدر/NN'), ('', 'للسي…	['حزن']	صين اكبر مصدر سيار عالم عام اعلن زار صناع تكنولوج معلوم صين يوم جمع صين توج اكبر مصدر سيار عالم عام صدر مليو سيار وف سياق متصل تجاوز انتاج مبيع مركب طاق جديد مليو مليو وحد عام زياد نسب المء نسب المء اساس سنو توال حسبم اظهر يان اصدر جمع صين مصنع سيار نقل كال شينخ وارتفع صادر مركب طاق صين جديد نسب المء اساس سنو مليو وحد عام ماض		Economy		Car		Real
يونيسيف ألف طفل ولدوا في جحيم الحرب فى غزة	Humanitarian	Israeli-Palestinian Conflict	Real		Humanitarian	Israeli-Palestinian Conflict	Real	يونيسيف ألف طفل ولدوا في جحيم الحرب فى غزة	[('', 'يونيسيف/NNP'), ('', 'ألف/VBD'), ('', 'طفل/NN'), ('', 'ولدوا/VBN'), ('', 'في/IN'), ('', 'جحيم/NN'), ('', 'الحرب/DTNN'), ('', 'فى/IN'), ('', 'غزة/NNP')]	['حزن']	يونيسيف طفل لدو جحيم حرب فى غز		Humanitarian		Israeli-Palestinian Conflict		Real
الرئيس الفرنسي نتواصل مع قطر للعمل سويا على إطلاق الرهائن في غزة	Politics	Israeli-Palestinian Conflict	Real		Politics	Israeli-Palestinian Conflict	Real	الرئيس الفرنسي نتواصل مع قطر للعمل سويا على إطلاق الرهائن في غزة	[('', 'الرئيس/DTNN'), ('', 'الفرنسي/DTJJ'), ('', 'نتواصل/NNP'), ('', 'مع/NN'), ('', 'قطر/NNP'), ('', 'للعمل/NNP'), ('', 'سويا/JJ'), ('', 'على/IN'), ('', 'إطلاق/NN'), ('', 'الرهائن/DTNN'), ('', 'في/IN'), ('', 'غزة/NNP')]	['حزن']	رييس فرنس نتواصل قطر عمل سو اطلاق رهاء غز		Politics		Israeli-Palestinian Conflict		Real
وزارة الصحة في غزة الاحتلال ارتكب مجزرة راح ضحيتها شهيدا و مصابا خلال الساعات الـ الماضية	Health	Israeli-Palestinian Conflict	Real		Humanitarian	Israeli-Palestinian Conflict	Real	وزارة الصحة في غزة الاحتلال ارتكب مجزرة راح ضحيتها شهيدا و مصابا خلال الساعات الـ الماضية	[('', 'وزارة/NN'), ('', 'الصحة/DTNN'), ('', 'في/IN'), ('', 'غزة/NNP'), ('', 'الاحتلال/DTNN'), ('', 'ارتكب/VBD'), ('', 'مجزرة/NN'), ('', 'راح/NN'), ('', 'ضحيتها/NN'), ('', 'شهيدا/JJ'), ('', 'و/CC'), ('', 'مصابا/NN'), ('', 'خلال/NN'), ('', 'الساعات/DTNNS'), ('', 'الـ/DTJJ'), ('', 'الماضية/DTJJ')]	['No Emotion Detected']	زار الصح غز احتلال ارتكب مجزر ضح شهيد مصاب خلال ساع ال ماض		Health		Israeli-Palestinian Conflict		Real
القسام دمرنا دبابات من نوع ميركافا بعبوات شواظ شرق مدينة خان يونس جنوبي قطاع غزة	Politics	Israeli-Palestinian Conflict	Real		Politics	Israeli-Palestinian Conflict	Real	القسام دمرنا دبابات من نوع ميركافا بعبوات شواظ شرق مدينة خان يونس جنوبي قطاع غزة	[('', 'القسام/DTNNP'), ('', 'دمرنا/VBD'), ('', 'دبابات/NNS'), ('', 'من/IN'), ('', 'نوع/NN'), ('', 'ميركافا/NNP'), ('', 'بعبوات/NNP'), ('', 'شواظ/NNP'), ('', 'شرق/NN'), ('', 'مدينة/NN'), ('', 'خان/NNP'), ('', 'يونس/NNP'), ('', 'جنوبي/NN'), ('', 'قطاع/NN'), ('', 'غزة/NNP')]	['سعادة']	قسام دمر دباب نوع ميركاف عبو شواظ شرق مدين خان يونس جنوب قطاع غز		Politics		Israeli-Palestinian Conflict		Real
مسيرات حاشدة في مختلف مناطق المملكة نصرة لقطاع غزة	Society	Local	Real		Society	Local	Real	مسيرات حاشدة في مختلف مناطق المملكة نصرة لقطاع غزة	[('', 'مسيرات/NNS'), ('', 'حاشدة/JJ'), ('', 'في/IN'), ('', 'مختلف/JJ'), ('', 'مناطق/NN'), ('', 'المملكة/DTNN'), ('', 'نصرة/NN'), ('', 'لقطاع/NN'), ('', 'غزة/NNP')]	['Conflicting Emotions Detected']	مسير حاشد مختلف مناطق مملك نصر قطاع غز		Society		Local		Real
جيش الاحتلال إصابة ضابطا وجنديا في معارك غزة خلال الساعات الـ الماضية	Politics	Israeli-Palestinian Conflict	Real		Politics	Israeli-Palestinian Conflict	Real	جيش الاحتلال إصابة ضابطا وجنديا في معارك غزة خلال الساعات الـ الماضية	[('', 'جيش/NN'), ('', 'الاحتلال/DTNN'), ('', 'إصابة/NN'), ('', 'ضابطا/NN'), ('', 'وجنديا/JJ'), ('', 'في/IN'), ('', 'معارك/NN'), ('', 'غزة/NNP'), ('', 'خلال/NN'), ('', 'الساعات/DTNNS'), ('', 'الـ/DTJJ'), ('', 'الماضية/DTJJ')]	['غضب']	جيش احتلال اصاب ضابط جند معار غز خلال ساع ال ماض		Politics		Israeli-Palestinian Conflict		Real
دمرت إسرائيل منزلهما عروسان يحتفلان بزفافهما في غزة	Humanitarian	Israeli-Palestinian Conflict	Real		Humanitarian	Israeli-Palestinian Conflict	Real	دمرت إسرائيل منزلهما عروسان يحتفلان بزفافهما في غزة	[('', 'دمرت/VBD'), ('', 'إسرائيل/NN'), ('', 'منزلهما/NN'), ('', 'عروسان/NNS'), ('', 'يحتفلان/VBP'), ('', 'بزفافهما/NN'), ('', 'في/IN'), ('', 'غزة/NNP')]	['حزن']	دمر اسراييل منزل عروس يحتفل زفاف غز		Humanitarian		Israeli-Palestinian Conflict		Real
وزارة الصحة في غزة ارتفاع عدد الشهداء إلى و إصابة منذ بدء العدوان الإسرائيلي على القطاع	Health	Israeli-Palestinian Conflict	Real		Health	Israeli-Palestinian Conflict	Real	وزارة الصحة في غزة ارتفاع عدد الشهداء إلى و إصابة منذ بدء العدوان الإسرائيلي على القطاع	[('', 'وزارة/NN'), ('', 'الصحة/DTNN'), ('', 'في/IN'), ('', 'غزة/NNP'), ('', 'ارتفاع/NN'), ('', 'عدد/NN'), ('', 'الشهداء/DTNN'), ('', 'إلى/VBD'), ('', 'و/CC'), ('', 'إصابة/NN'), ('', 'منذ/IN'), ('', 'بدء/NN'), ('', 'العدوان/DTNN'), ('', 'الإسرائيلي/DTJJ'), ('', 'على/IN'), ('', 'القطاع/DTNN')]	['حزن']	زار الصح غز ارتفاع عدد شهداء اصاب بدء عدو اسراييل قطاع		Health		Israeli-Palestinian Conflict		Real
مسيرة حاشدة في وسط البلد نصرة لقطاع غزة	Society	Local	Real		Society	Local	Real	مسيرة حاشدة في وسط البلد نصرة لقطاع غزة	[('', 'مسيرة/NN'), ('', 'حاشدة/JJ'), ('', 'في/IN'), ('', 'وسط/NN'), ('', 'البلد/DTNN'), ('', 'نصرة/NN'), ('', 'لقطاع/NN'), ('', 'غزة/NNP')]	['Conflicting Emotions Detected']	مسير حاشد وسط بلد نصر قطاع غز		Society		Local		Real
صلاة الغائب على الشهداء في قطاع غزة وفلسطين المحتلة	Society	Local	Real		Society	Local	Real	صلاة الغائب على الشهداء في قطاع غزة وفلسطين المحتلة	[('', 'صلاة/NN'), ('', 'الغائب/DTNN'), ('', 'على/IN'), ('', 'الشهداء/DTNN'), ('', 'في/IN'), ('', 'قطاع/NN'), ('', 'غزة/NNP'), ('', 'وفلسطين/NNP'), ('', 'المحتلة/DTJJ')]	['حزن']	صلا غايب شهداء قطاع غز فلسط محتل		Society		Local		Real
من داخل ساحات الأقصى قبيل صلاة الجمعة رغم الإجراءات الأمنية المشددة	Society	International	Real		Society	International	Real	من داخل ساحات الأقصى قبيل صلاة الجمعة رغم الإجراءات الأمنية المشددة	[('', 'من/IN'), ('', 'داخل/NN'), ('', 'ساحات/NNS'), ('', 'الأقصى/DTNN'), ('', 'قبيل/NN'), ('', 'صلاة/NN'), ('', 'الجمعة/DTNN'), ('', 'رغم/NN'), ('', 'الإجراءات/DTNNS'), ('', 'الأمنية/DTJJ'), ('', 'المشددة/DTJJ')]	['No Emotion Detected']	داخل ساح اقصى قبيل صلا جمع رغم اجراء امن مشدد		Society		International		Real
عناصر من شرطة الاحتلال يقتحمون المسجد الأقصى ويتجولون في ساحاته قبيل صلاة الجمعة	Politics	Israeli-Palestinian Conflict	Real		Politics	Israeli-Palestinian Conflict	Real	عناصر من شرطة الاحتلال يقتحمون المسجد الأقصى ويتجولون في ساحاته قبيل صلاة الجمعة	[('', 'عناصر/NN'), ('', 'من/IN'), ('', 'شرطة/NN'), ('', 'الاحتلال/DTNN'), ('', 'يقتحمون/VBP'), ('', 'المسجد/DTNN'), ('', 'الأقصى/DTJJ'), ('', 'ويتجولون/NNP'), ('', 'في/IN'), ('', 'ساحاته/NN'), ('', 'قبيل/NN'), ('', 'صلاة/NN'), ('', 'الجمعة/DTNN')]	['اشمئزاز']	عناصر شرط احتلال يقتحم مسجد اقصى يتجول ساحا قبيل صلا جمع		Politics		Israeli-Palestinian Conflict		Real
ارتفاع عدد الشهداء إلى في خان يونس منذ الفجر بعد استشهاد اثنين في قصف إسرائيلي على عبسان	Politics	Israeli-Palestinian Conflict	Real		Politics	Israeli-Palestinian Conflict	Real	ارتفاع عدد الشهداء إلى في خان يونس منذ الفجر بعد استشهاد اثنين في قصف إسرائيلي على عبسان	[('', 'ارتفاع/NN'), ('', 'عدد/NN'), ('', 'الشهداء/DTNN'), ('', 'إلى/VBD'), ('', 'في/IN'), ('', 'خان/NNP'), ('', 'يونس/NNP'), ('', 'منذ/IN'), ('', 'الفجر/DTNN'), ('', 'بعد/NN'), ('', 'استشهاد/NN'), ('', 'اثنين/NNS'), ('', 'في/IN'), ('', 'قصف/NN'), ('', 'إسرائيلي/JJ'), ('', 'على/IN'), ('', 'عبسان/NNS')]	['حزن']	ارتفاع عدد شهداء خان يونس فجر استشهاد قصف اسراييل عبسا		Politics		Israeli-Palestinian Conflict		Real
لقاء سيري وتولين الحرازنة ابطال في سباحة الزعانف	Sports	Swimming	Real		Sports	Swimming	Real	لقاء سيري وتولين الحرازنة ابطال في سباحة الزعانف	[('', 'لقاء/NN'), ('', 'سيري/NNP'), ('', 'وتولين/NNP'), ('', 'الحرازنة/DTNNP'), ('', 'ابطال/NN'), ('', 'في/IN'), ('', 'سباحة/NN'), ('', 'الزعانف/DTNN')]	['Conflicting Emotions Detected']	لقاء سير تول حرازن ابطال سباح زعانف		Sports		Swimming		Real
جولة فريق يسعد صباحك في واحة أيلة يسعد صباحك الأردن	Media	TV Show	Real		Media	TV Show	Real	جولة فريق يسعد صباحك في واحة أيلة يسعد صباحك الأردن	[('', 'جولة/NN'), ('', 'فريق/NN'), ('', 'يسعد/VBP'), ('', 'صباحك/NNP'), ('', 'في/IN'), ('', 'واحة/NN'), ('', 'أيلة/NN'), ('', 'يسعد/VBP'), ('', 'صباحك/NNP'), ('', 'الأردن/DTNNP'), ('', 'التلفزيون/DTNN'), ('', 'الأردني/DTJJ')]	['No Emotion Detected']	جول ريق يسعد صباح واح ايل يسعد صباح ارد تلفز اردن		Media		TV Show		Real
رمال ساحرة تأخذك الى عالم الخيال وادي رم حازم رحاحلة يسعد صباحك الأردن	Tourism	Promotion	Real		Tourism	Promotion	Real	رمال ساحرة تأخذك الى عالم الخيال وادي رم حازم رحاحلة يسعد صباحك الأردن	[('', 'رمال/NN'), ('', 'ساحرة/NN'), ('', 'تأخذك/VBP'), ('', 'الى/IN'), ('', 'عالم/NN'), ('', 'الخيال/DTNN'), ('', 'وادي/NN'), ('', 'رم/NN'), ('', 'حازم/JJ'), ('', 'رحاحلة/JJ'), ('', 'يسعد/VBP'), ('', 'صباحك/NNP'), ('', 'الأردن/DTNNP'), ('', 'التلفزيون/DTNN'), ('', 'الأردني/DTJJ')]	['مفاجأه']	رمال ساحر تاخذ الى عالم خيال واد رم حازم رحاحل يسعد صباح ارد تلفز اردن		Tourism		Promotion		Real
الحرف اليدوية والصناعات التقليدية من محافظة العقبة يسعد صباحك الأردن	Tourism	Promotion	Real		Tourism	Promotion	Real	الحرف اليدوية والصناعات التقليدية من محافظة العقبة يسعد صباحك الأردن	[('', 'الحرف/DTNN'), ('', 'اليدوية/DTJJ'), ('', 'والصناعات/NNS'), ('', 'التقليدية/DTJJ'), ('', 'من/IN'), ('', 'محافظة/NN'), ('', 'العقبة/DTNNP'), ('', 'يسعد/VBP'), ('', 'صباحك/NNP'), ('', 'الأردن/DTNNP'), ('', 'التلفزيون/DTNN'), ('', 'الأردني/DTJJ')]	['غضب']	حرف يدو صناع تقليد محافظ عقب يسعد صباح ارد تلفز اردن		Tourism		Promotion		Real
سوق عقباوي للحرف اليدوية في واحة إيلة يسعد صباحك الأردن	Tourism	Promotion	Real		Tourism	Promotion	Real	سوق عقباوي للحرف اليدوية في واحة إيلة يسعد صباحك الأردن	[('', 'سوق/NN'), ('', 'عقباوي/NNP'), ('', 'للحرف/NNP'), ('', 'اليدوية/DTJJ'), ('', 'في/IN'), ('', 'واحة/NN'), ('', 'إيلة/NN'), ('', 'يسعد/VBP'), ('', 'صباحك/NNP'), ('', 'الأردن/DTNNP'), ('', 'التلفزيون/DTNN'), ('', 'الأردني/DTJJ')]	['No Emotion Detected']	سوق عقبا حرف يدو واح ايل يسعد صباح ارد تلفز اردن		Tourism		Promotion		Real
جمعية سيدات بيت الورد التعاونية في العقبة يسعد صباحك الأردن	Society	Women Issues	Real		Society	Women Issues	Real	جمعية سيدات بيت الورد التعاونية في العقبة يسعد صباحك الأردن	[('', 'جمعية/NN'), ('', 'سيدات/NNS'), ('', 'بيت/NNP'), ('', 'الورد/DTNN'), ('', 'التعاونية/DTJJ'), ('', 'في/IN'), ('', 'العقبة/DTNNP'), ('', 'يسعد/VBP'), ('', 'صباحك/NNP'), ('', 'الأردن/DTNNP'), ('', 'التلفزيون/DTNN'), ('', 'الأردني/DTJJ')]	['حزن']	جمع سيد بيت ورد تعاون عقب يسعد صباح ارد تلفز اردن		Society		Women Issues		Real
جمعية سيدات بيت الورد التعاونية في العقبة رانيا النسعة رئيسة جمعية سيدات بيت الورد التعاونية يسعد صباحك الأردن	Society	Women Issues	Real		Society	Women Issues	Real	جمعية سيدات بيت الورد التعاونية في العقبة رانيا النسعة رئيسة جمعية سيدات بيت الورد التعاونية يسعد صباحك الأردن	[('', 'جمعية/NN'), ('', 'سيدات/NNS'), ('', 'بيت/NNP'), ('', 'الورد/DTNN'), ('', 'التعاونية/DTJJ'), ('', 'في/IN'), ('', 'العقبة/DTNNP'), ('', 'رانيا/NNP'), ('', 'النسعة/DTNN'), ('', 'رئيسة/NN'), ('', 'جمعية/NN'), ('', 'سيدات/NNS'), ('', 'بيت/NNP'), ('', 'الورد/DTNN'), ('', 'التعاونية/DTJJ'), ('', 'يسعد/VBP'), ('', 'صباحك/NNP'), ('', 'الأردن/DTNNP'), ('', 'التلفزيون/DTNN'), ('', 'الأردني/DTJJ')]	['حزن']	جمع سيد بيت ورد تعاون عقب ران نسع رييس جمع سيد بيت ورد تعاون يسعد صباح ارد تلفز اردن		Society		Women Issues		Real
جولة في أهم الأماكن السياحية في العقبة مع حازم رحاحلة ورندة كرادشة يسعد صباحك الأردن	Tourism	Promotion	Real		Tourism	Promotion	Real	جولة في أهم الأماكن السياحية في العقبة مع حازم رحاحلة ورندة كرادشة يسعد صباحك الأردن	[('', 'جولة/NN'), ('', 'في/IN'), ('', 'أهم/NN'), ('', 'الأماكن/DTNN'), ('', 'السياحية/DTJJ'), ('', 'في/IN'), ('', 'العقبة/DTNNP'), ('', 'مع/NN'), ('', 'حازم/NNP'), ('', 'رحاحلة/NNP'), ('', 'ورندة/NNP'), ('', 'كرادشة/NNP'), ('', 'يسعد/VBP'), ('', 'صباحك/NNP'), ('', 'الأردن/DTNNP'), ('', 'التلفزيون/DTNN'), ('', 'الأردني/DTJJ')]	['حزن']	جول اهم اماك سياح عقب حازم رحاحل رند رادش يسعد صباح ارد تلفز اردن		Tourism		Promotion		Real
موسم التخفيضات ينعش العقبة اقتصاديا نايف الفايز رئيس مجلس مفوًّضي سلطة منطقة العقبة الاقتصادية الخاصة يسعد صباحك الأردن	Economy	Financial Policies	Real		Economy	Financial Policies	Real	موسم التخفيضات ينعش العقبة اقتصاديا نايف الفايز رئيس مجلس مفوًّضي سلطة منطقة العقبة الاقتصادية الخاصة يسعد صباحك الأردن	[('', 'موسم/NN'), ('', 'التخفيضات/DTNNS'), ('', 'ينعش/VBP'), ('', 'العقبة/DTNN'), ('', 'اقتصاديا/NN'), ('', 'نايف/NNP'), ('', 'الفايز/DTNNP'), ('', 'رئيس/NN'), ('', 'مجلس/NN'), ('', 'مفوضي/NNS'), ('', 'سلطة/NN'), ('', 'منطقة/NN'), ('', 'العقبة/DTNN'), ('', 'الاقتصادية/DTJJ'), ('', 'الخاصة/DTJJ'), ('', 'يسعد/VBP'), ('', 'صباحك/NNP'), ('', 'الأردن/DTNNP'), ('', 'التلفزيون/DTNN'), ('', 'الأردني/DTJJ…	['سعادة']	موسم تخفيض ينعش عقب اقتصاد نايف فايز رييس مجلس مفوض سلط منطق عقب اقتصاد خاص يسعد صباح ارد تلفز اردن		Economy		Financial Policies		Real
صباح الوطن الجميل من وادي عربة في محافظة العقبة يسعد صباحك الأردن	Tourism	Local	Real		Tourism	Local	Real	صباح الوطن الجميل من وادي عربة في محافظة العقبة يسعد صباحك الأردن	[('', 'صباح/NN'), ('', 'الوطن/DTNN'), ('', 'الجميل/DTJJ'), ('', 'من/IN'), ('', 'وادي/NN'), ('', 'عربة/NNP'), ('', 'في/IN'), ('', 'محافظة/NN'), ('', 'العقبة/DTNNP'), ('', 'يسعد/VBP'), ('', 'صباحك/NNP'), ('', 'الأردن/DTNNP'), ('', 'التلفزيون/DTNN'), ('', 'الأردني/DTJJ')]	['غضب']	وطن جميل واد عرب محافظ عقب يسعد صباح ارد تلفز اردن		Tourism		Local		Real
جيش الاحتلال وفاة جندي متأثرا بجروح أصيب بها قبل أيام خلال معارك بجنوب قطاع غزة	Politics	Israeli-Palestinian Conflict	Real		Politics	Israeli-Palestinian Conflict	Real	جيش الاحتلال وفاة جندي متأثرا بجروح أصيب بها قبل أيام خلال معارك بجنوب قطاع غزة	[('', 'جيش/NN'), ('', 'الاحتلال/DTNN'), ('', 'وفاة/NN'), ('', 'جندي/NN'), ('', 'متأثرا/JJ'), ('', 'بجروح/NN'), ('', 'أصيب/NN'), ('', 'بها/NN'), ('', 'قبل/NN'), ('', 'أيام/NN'), ('', 'خلال/NN'), ('', 'معارك/NN'), ('', 'بجنوب/NNP'), ('', 'قطاع/NN'), ('', 'غزة/NNP')]	['غضب']	جيش احتلال وفا جند متاثر جروح اصيب ايام خلال معار جنوب قطاع غز		Politics		Israeli-Palestinian Conflict		Real
صمود غزة بعد أكثر من يوم يتصدر التريند الأردن تريند شو غزة	Politics	Israeli-Palestinian Conflict	Real		Politics	Israeli-Palestinian Conflict	Real	صمود غزة بعد أكثر من يوم يتصدر التريند الأردن تريند شو غزة	[('', 'صمود/NN'), ('', 'غزة/NNP'), ('', 'بعد/NN'), ('', 'أكثر/NN'), ('', 'من/IN'), ('', 'يوم/NN'), ('', 'يتصدر/VBP'), ('', 'التريند/DTNN'), ('', 'الأردن/DTJJ'), ('', 'التلفزيون/DTNN'), ('', 'الأردني/DTJJ'), ('', 'تريند/NNP'), ('', 'شو/NNP'), ('', 'غزة/NNP')]	['Conflicting Emotions Detected']	صمود غز يوم يتصدر تريند ارد تلفز اردن تريند شو غز		Politics		Israeli-Palestinian Conflict		Real
أطفال ناجون من السرطان يخطفون القلوب الأردن تريند شو	Health	Cancer	Real		Health	Cancer	Real	أطفال ناجون من السرطان يخطفون القلوب الأردن تريند شو	[('', 'أطفال/NN'), ('', 'ناجون/NNS'), ('', 'من/IN'), ('', 'السرطان/DTNN'), ('', 'يخطفون/VBP'), ('', 'القلوب/DTNN'), ('', 'الأردن/DTJJ'), ('', 'التلفزيون/DTNN'), ('', 'الأردني/DTJJ'), ('', 'تريند/NNP'), ('', 'شو/NNP')]	['No Emotion Detected']	اطفال ناجو سرط يخطف قلوب ارد تلفز اردن تريند شو		Health		Cancer		Real
الشمالي لا رفع على أسعار الخبز مهما كانت أسعار القمح عالميا	Economy	Financial Policies	Real		Economy	Financial Policies	Real	الشمالي لا رفع على أسعار الخبز مهما كانت أسعار القمح عالميا	[('', 'الشمالي/DTJJ'), ('', 'لا/RP'), ('', 'رفع/VBN'), ('', 'على/IN'), ('', 'أسعار/NN'), ('', 'الخبز/DTNN'), ('', 'مهما/WP'), ('', 'كانت/VBD'), ('', 'أسعار/NN'), ('', 'القمح/DTNN'), ('', 'عالميا/JJ')]	['حزن']	شمال رفع اسعار خبز كان اسعار قمح عالم		Economy		Financial Policies		Real
الشمالي للتلفزيون الأردني لا زيادة على الأسعار في شهر رمضان	Economy	Financial Policies	Real		Economy	Financial Policies	Real	الشمالي للتلفزيون الأردني لا زيادة على الأسعار في شهر رمضان	[('', 'الشمالي/DTJJ'), ('', 'للتلفزيون/NNS'), ('', 'الأردني/DTNN'), ('', 'لا/RP'), ('', 'زيادة/NN'), ('', 'على/IN'), ('', 'الأسعار/DTNN'), ('', 'في/IN'), ('', 'شهر/NN'), ('', 'رمضان/NNP')]	['غضب']	شمال تلفز اردن زياد اسعار شهر رمضا		Economy		Financial Policies		Real
سمو ولي العهد يلتقي مرتبات المستشفى الميداني الاردني العائدين من غزة	Government	Official Visit	Real		Government	Official Visit	Real	سمو ولي العهد يلتقي مرتبات المستشفى الميداني الاردني العائدين من غزة	[('', 'سمو/NN'), ('', 'ولي/NN'), ('', 'العهد/DTNN'), ('', 'يلتقي/VBP'), ('', 'مرتبات/NNS'), ('', 'المستشفى/DTNN'), ('', 'الميداني/DTJJ'), ('', 'الاردني/DTJJ'), ('', 'العائدين/VN'), ('', 'من/IN'), ('', 'غزة/NNP')]	['حزن']	سمو ول عهد يلتق مرتب مستشفى ميدان اردن عايد غز		Government		Official Visit		Real
إشادات بجهود سمو ولي العهد لدفع عجلة التكنولوجيا الأردن تريند شو	Government	Technology	Real		Government	Technology	Real	إشادات بجهود سمو ولي العهد لدفع عجلة التكنولوجيا الأردن تريند شو	[('', 'إشادات/NNS'), ('', 'بجهود/NN'), ('', 'سمو/NN'), ('', 'ولي/NN'), ('', 'العهد/DTNN'), ('', 'لدفع/NN'), ('', 'عجلة/NN'), ('', 'التكنولوجيا/DTNN'), ('', 'الأردن/DTJJ'), ('', 'التلفزيون/DTNN'), ('', 'الأردني/DTJJ'), ('', 'تريند/NNP'), ('', 'شو/NNP')]	['حب']	اشاد جهود سمو ول عهد لدفع عجل تكنولوج ارد تلفز اردن تريند شو		Government		Technology		Real
جلالة الملك يستقبل وزير الخارجية التركي	Government	Diplomacy Relations	Real		Government	International	Real	جلالة الملك يستقبل وزير الخارجية التركي	[('', 'جلالة/NN'), ('', 'الملك/DTNN'), ('', 'يستقبل/VBP'), ('', 'وزير/NN'), ('', 'الخارجية/DTNN'), ('', 'التركي/DTJJ')]	['No Emotion Detected']	جلال ملك يستقبل زير خارج ترك		Government		Diplomacy Relations		Real
مسارات خطط مواجهة تداعيات الاقليم على الاقتصاد مع الضيف وزير الصناعة والتجارة والتموين يوسف الشمالي	Economy	Local	Real		Economy	Local	Real	مسارات خطط مواجهة تداعيات الاقليم على الاقتصاد مع الضيف وزير الصناعة والتجارة والتموين يوسف الشمالي	[('', 'مسارات/NNS'), ('', 'خطط/NN'), ('', 'مواجهة/NN'), ('', 'تداعيات/NNS'), ('', 'الاقليم/DTNN'), ('', 'على/IN'), ('', 'الاقتصاد/DTNN'), ('', 'مع/NN'), ('', 'الضيف/DTNN'), ('', 'وزير/NN'), ('', 'الصناعة/DTNN'), ('', 'والتجارة/NNP'), ('', 'والتموين/NNP'), ('', 'يوسف/NNP'), ('', 'الشمالي/DTJJ')]	['No Emotion Detected']	مسار خطط مواجه تداع اقليم اقتصاد ضيف زير صناع تجار والتم يوسف شمال		Economy		Local		Real
رسائل مؤثرة لجلالة الملكة رانيا العبدالله في انستغرام الأردن تريند شو غزة	Government	Royal	Real		Government	Royal	Real	رسائل مؤثرة لجلالة الملكة رانيا العبدالله في انستغرام الأردن تريند شو غزة	[('', 'رسائل/NN'), ('', 'مؤثرة/JJ'), ('', 'لجلالة/NN'), ('', 'الملكة/DTNN'), ('', 'رانيا/NNP'), ('', 'العبدالله/DTNNP'), ('', 'في/IN'), ('', 'انستغرام/NN'), ('', 'الأردن/DTNN'), ('', 'التلفزيون/DTNN'), ('', 'الأردني/DTJJ'), ('', 'تريند/NNP'), ('', 'شو/NNP'), ('', 'غزة/NNP')]	['حب']	رسايل موثر جلال ملك ران عبدالله انستغرام ارد تلفز اردن تريند شو غز		Government		Royal		Real
تريند شو جولة سريعة في صفحات منصات التواصل الإجتماعي لأهم الترندات التي تم التفاعل معها خلال هذا الأسبوع الأردن تريند شو	Society	Local	Real		Society	Local	Real	تريند شو جولة سريعة في صفحات منصات التواصل الإجتماعي لأهم الترندات التي تم التفاعل معها خلال هذا الأسبوع الأردن تريند شو	[('', 'تريند/NNP'), ('', 'شو/NNP'), ('', 'جولة/NN'), ('', 'سريعة/JJ'), ('', 'في/IN'), ('', 'صفحات/NNS'), ('', 'منصات/NNS'), ('', 'التواصل/DTNN'), ('', 'الإجتماعي/DTJJ'), ('', 'لأهم/NN'), ('', 'الترندات/DTNNS'), ('', 'التي/WP'), ('', 'تم/VBD'), ('', 'التفاعل/DTNN'), ('', 'معها/NN'), ('', 'خلال/NN'), ('', 'هذا/DT'), ('', 'الأسبوع/DTNN'), ('', 'الأردن/DTJJ'), ('', 'التلفزيون/DTNN'), ('', 'الأردني/DT…	['حزن']	تريند شو جول سريع صفح منص تواصل اجتماع لاهم ترند تم تفاعل معه خلال اسبوع ارد تلفز اردن تريند شو		Society		Local		Real
إقبال كبير على تناول الحلويات في فصل الشتاء	Environment	Local	Real		Environment	Local	Real	إقبال كبير على تناول الحلويات في فصل الشتاء	[('', 'إقبال/NN'), ('', 'كبير/JJ'), ('', 'على/IN'), ('', 'تناول/NN'), ('', 'الحلويات/DTNNS'), ('', 'في/IN'), ('', 'فصل/NN'), ('', 'الشتاء/DTNN')]	['No Emotion Detected']	اقبال كبير تناول حلو فصل شتاء		Environment		Local		Real
الهيئة الخيرية طائرة و شاحنة مساعدات أرسلت إلى غزة منذ بدء الأزمة	Humanitarian	Aid	Real		Humanitarian	Aid	Real	الهيئة الخيرية طائرة و شاحنة مساعدات أرسلت إلى غزة منذ بدء الأزمة	[('', 'الهيئة/DTNN'), ('', 'الخيرية/DTJJ'), ('', 'طائرة/NN'), ('', 'و/CC'), ('', 'شاحنة/NN'), ('', 'مساعدات/NNS'), ('', 'أرسلت/VBD'), ('', 'إلى/NN'), ('', 'غزة/NNP'), ('', 'منذ/IN'), ('', 'بدء/NN'), ('', 'الأزمة/DTNN')]	['سعادة']	هيء خير طاير شاحن مساعد ارسل غز بدء ازم		Humanitarian		Aid		Real
إتصال هاتفي مع د عبد الحكيم القرالة استاذ العلوم السياسية للحديث عن أوضاع غزة	Media	Palestine	Real		Society	Local	Real	إتصال هاتفي مع د عبد الحكيم القرالة استاذ العلوم السياسية للحديث عن أوضاع غزة	[('', 'إتصال/NN'), ('', 'هاتفي/JJ'), ('', 'مع/NN'), ('', 'د/NN'), ('', 'عبد/NNP'), ('', 'الحكيم/DTNNP'), ('', 'القرالة/DTNNP'), ('', 'استاذ/NN'), ('', 'العلوم/DTNN'), ('', 'السياسية/DTJJ'), ('', 'للحديث/NNP'), ('', 'عن/IN'), ('', 'أوضاع/NN'), ('', 'غزة/NNP')]	['حزن']	اتصال هاتف عبد حكيم قرال استاذ علوم سياس حديث اوضاع غز		Media		Palestine		Real
المعايطة شرطة النجدة المستجيب الأول لإغاثة المواطن ومكافحة الجريمة	Military	National Security	Real		Military	National Security	Real	المعايطة شرطة النجدة المستجيب الأول لإغاثة المواطن ومكافحة الجريمة	[('', 'المعايطة/DTNN'), ('', 'شرطة/NN'), ('', 'النجدة/DTNN'), ('', 'المستجيب/DTJJ'), ('', 'الأول/DTNN'), ('', 'لإغاثة/NN'), ('', 'المواطن/DTNN'), ('', 'ومكافحة/NN'), ('', 'الجريمة/DTNN')]	['اشمئزاز']	معايط شرط نجد مستجيب اول اغاث مواط مكافح جريم		Military		National Security		Real
ولي العهد يزور ضابطين من مرتبات كوادر المستشفيات الميدانية في غزة عقب لقائه مرتبات المستشفى الميداني الأردني السابق في غزة زار سمو الأمير الحسين بن عبدالله الثاني ولي العهد اليوم الخميس المصاب العسكري من مرتبات المستشفى الميداني الأردني الخاص في خان يونس جنوب قطاع غزة والذي يرقد على سرير الشفاء بمدينة الحسين الطبية إثر تعرضه أمس للإصابة نتيجة اشتباكات في محيط المستشفى واطمأن سموه خلال الزيارة الت…	Government	Official Visit	Real		Government	Official Visit	Real	ولي العهد يزور ضابطين من مرتبات كوادر المستشفيات الميدانية في غزة عقب لقائه مرتبات المستشفى الميداني الأردني السابق في غزة زار سمو الأمير الحسين بن عبدالله الثاني ولي العهد اليوم الخميس المصاب العسكري من مرتبات المستشفى الميداني الأردني الخاص في خان يونس جنوب قطاع غزة والذي يرقد على سرير الشفاء بمدينة الحسين الطبية إثر تعرضه أمس للإصابة نتيجة اشتباكات في محيط المستشفى واطمأن سموه خلال الزيارة الت…	[('', 'ولي/NN'), ('', 'العهد/DTNN'), ('', 'يزور/VBP'), ('', 'ضابطين/NNS'), ('', 'من/IN'), ('', 'مرتبات/NNS'), ('', 'كوادر/NN'), ('', 'المستشفيات/DTNNS'), ('', 'الميدانية/DTJJ'), ('', 'في/IN'), ('', 'غزة/NNP'), ('', 'عقب/NN'), ('', 'لقائه/NN'), ('', 'مرتبات/NNS'), ('', 'المستشفى/DTNN'), ('', 'الميداني/DTJJ'), ('', 'الأردني/DTJJ'), ('', 'السابق/DTJJ'), ('', 'في/IN'), ('', 'غزة/NNP'), ('', 'زار/VBD'…	['Conflicting Emotions Detected']	ول عهد يزور ضابط مرتب وادر مستشف ميدان غز عقب لقاء مرتب مستشفى ميدان اردن سابق غز زار سمو امير الحس بن عبدالل ثان ول عهد يوم خميس مصاب عسكر مرتب مستشفى ميدان اردن خاص خان يونس جنوب قطاع غز يرقد سرير شفاء مدين الحس الطب اثر تعرض اصاب نتيج اشتباك محيط مستشفى واطمء سمو خلال زيار رافق مدير عام خدم الطب ملك حال مصاب الصح متمن شفاء عاجل كان القو مسلح اردن جيش عرب اخل مصاب جوا مدين الحس الطب لتلق علاج ل…		Government		Official Visit		Real
برنامج بين السطور قراءة وتحليل لأبرز ماتداوله الكتّاب في الصحف المحليّة والعربيّة والعالميّة الاردن	Media	Analysis	Real		Media	Analysis	Real	برنامج بين السطور قراءة وتحليل لأبرز ماتداوله الكتّاب في الصحف المحليّة والعربيّة والعالميّة الاردن	[('', 'برنامج/NN'), ('', 'بين/NN'), ('', 'السطور/DTNN'), ('', 'قراءة/NN'), ('', 'وتحليل/NN'), ('', 'لأبرز/NNP'), ('', 'ماتداوله/NNP'), ('', 'الكتاب/DTNN'), ('', 'في/IN'), ('', 'الصحف/DTNN'), ('', 'المحلية/DTJJ'), ('', 'والعربية/NN'), ('', 'والعالمية/JJ'), ('', 'الاردن/DTNNP'), ('', 'التلفزيون/DTNN'), ('', 'الأردني/DTJJ')]	['No Emotion Detected']	رنامج سطور قراء تحليل ابرز ماتداول كتاب صحف محل عرب عالم ارد تلفز اردن		Media		Analysis		Real
إنتظرونا بحلقة جديدة غداً من برنامج يسعد صباحك من ثغر الأردن الباسم العقبة 😍 الاردن	Media	TV Show	Real		Media	TV Show	Real	إنتظرونا بحلقة جديدة غداً من برنامج يسعد صباحك من ثغر الأردن الباسم العقبة 😍 الاردن	[('', 'إنتظرونا/VBD'), ('', 'بحلقة/NN'), ('', 'جديدة/JJ'), ('', 'غدا/NN'), ('', 'من/IN'), ('', 'برنامج/NN'), ('', 'يسعد/VBP'), ('', 'صباحك/NN'), ('', 'من/IN'), ('', 'ثغر/NN'), ('', 'الأردن/DTNN'), ('', 'الباسم/DTNNP'), ('', 'العقبة/DTNNP'), ('', 'الاردن/DTNNP'), ('', 'التلفزيون/DTNN'), ('', 'الأردني/DTJJ')]	['No Emotion Detected']	انتظر حلق جديد غدا رنامج يسعد صباح ثغر ارد باسم عقب ? ? ارد تلفز اردن		Media		TV Show		Real
سمو الأمير الحسين بن عبدالله الثاني ولي العهد يلتقي في الديوان الملكي الهاشمي مرتبات المستشفى الميداني الأردني السابق غزة الذين عادوا من القطاع الأسبوع الماضي بعد استلام المستشفى الميداني غزة مهامه سمو ولي العهد يعبر عن شكره لمرتبات المستشفى لما قدموه من جهود إنسانية كبيرة بخاصة رفيقات السلاح في ظل ما يشهده القطاع من عدوان مؤكدا أن الأردن مستمر في دعم الأشقاء الفلسطينيين سمو ولي العهد ينقل تحيات …	Government	Official Visit	Real		Government	Official Visit	Real	سمو الأمير الحسين بن عبدالله الثاني ولي العهد يلتقي في الديوان الملكي الهاشمي مرتبات المستشفى الميداني الأردني السابق غزة الذين عادوا من القطاع الأسبوع الماضي بعد استلام المستشفى الميداني غزة مهامه سمو ولي العهد يعبر عن شكره لمرتبات المستشفى لما قدموه من جهود إنسانية كبيرة بخاصة رفيقات السلاح في ظل ما يشهده القطاع من عدوان مؤكدا أن الأردن مستمر في دعم الأشقاء الفلسطينيين سمو ولي العهد ينقل تحيات …	[('', 'سمو/NN'), ('', 'الأمير/DTNN'), ('', 'الحسين/DTNNP'), ('', 'بن/NNP'), ('', 'عبدالله/NNP'), ('', 'الثاني/DTNNP'), ('', 'ولي/NN'), ('', 'العهد/DTNN'), ('', 'يلتقي/VBP'), ('', 'في/IN'), ('', 'الديوان/DTNN'), ('', 'الملكي/DTJJ'), ('', 'الهاشمي/DTJJ'), ('', 'مرتبات/NNS'), ('', 'المستشفى/DTNN'), ('', 'الميداني/DTJJ'), ('', 'الأردني/DTJJ'), ('', 'السابق/DTJJ'), ('', 'غزة/NNP'), ('', 'الذين/WP'), (…	['Conflicting Emotions Detected']	سمو امير الحس بن عبدالل ثان ول عهد يلتق ديو ملك هاشم مرتب مستشفى ميدان اردن سابق غز عادو قطاع اسبوع ماض استلام مستشفى ميدان غز مهام سمو ول عهد يعبر شكر مرتب مستشفى قدم جهود انسان كبير خاص رفيق سلاح ظل يشهد قطاع عدوا موكد ارد مستمر دعم اشقاء فلسطين سمو ول عهد ينقل تح جلال ملك عبدالل ثان قايد اعلى للقو مسلح مرتب مستشفى واعتزاز جهود بذل طوال شهور ماض تلفز اردن ارد		Government		Official Visit		Real
جلالة الملك عبدالله الثاني يستقبل وزير الخارجية التركي هاكان فيدان ويؤكد أهمية التنسيق الوثيق بين البلدين والبناء على جهود اللجنة الوزارية المكلفة من القمة العربية الإسلامية المشتركة بالتحرك الدولي لوقف الحرب على غزة تركيا	Government	Diplomacy Relations	Real		Government	Diplomacy Relations	Real	جلالة الملك عبدالله الثاني يستقبل وزير الخارجية التركي هاكان فيدان ويؤكد أهمية التنسيق الوثيق بين البلدين والبناء على جهود اللجنة الوزارية المكلفة من القمة العربية الإسلامية المشتركة بالتحرك الدولي لوقف الحرب على غزة تركيا	[('', 'جلالة/NN'), ('', 'الملك/DTNN'), ('', 'عبدالله/NNP'), ('الثاني/ADJ', 'NUM'), ('', 'يستقبل/VBP'), ('', 'وزير/NN'), ('', 'الخارجية/DTNN'), ('', 'التركي/DTJJ'), ('', 'هاكان/NNP'), ('', 'فيدان/NNP'), ('', 'ويؤكد/NNP'), ('', 'أهمية/NN'), ('', 'التنسيق/DTNN'), ('', 'الوثيق/DTJJ'), ('', 'بين/NN'), ('', 'البلدين/DTNNS'), ('', 'والبناء/NN'), ('', 'على/IN'), ('', 'جهود/NN'), ('', 'اللجنة/DTNN'), ('',…	['حزن']	جلال ملك عبدالل ثان يستقبل زير خارج ترك هاكا يدا يوكد اهم تنسيق وثيق بلد ناء جهود لجن وزار مكلف القم عرب اسلام مشترك تحرك دول لوقف حرب غز ارد ترك		Government		Diplomacy Relations		Real
جلالة الملك يستقبل وزير الخارجية التركي ويؤكد ضرورة الوقف الفوري لإطلاق النار في غزة استقبل جلالة الملك عبدالله الثاني في قصر الحسينية اليوم الخميس وزير الخارجية التركي هاكان فيدان وجرى خلال اللقاء بحث الجهود المبذولة لوقف الحرب على غزة والحد من تفاقم الأوضاع الإنسانية المأساوية في القطاع معربا جلالته عن تقديره لمواقف تركيا الثابتة وجهودها لإنهاء الحرب وأكد جلالة الملك أهمية التنسيق الوثيق بين ال…	Government	Diplomacy Relations	Real		Government	Diplomacy Relations	Real	جلالة الملك يستقبل وزير الخارجية التركي ويؤكد ضرورة الوقف الفوري لإطلاق النار في غزة استقبل جلالة الملك عبدالله الثاني في قصر الحسينية اليوم الخميس وزير الخارجية التركي هاكان فيدان وجرى خلال اللقاء بحث الجهود المبذولة لوقف الحرب على غزة والحد من تفاقم الأوضاع الإنسانية المأساوية في القطاع معربا جلالته عن تقديره لمواقف تركيا الثابتة وجهودها لإنهاء الحرب وأكد جلالة الملك أهمية التنسيق الوثيق بين ال…	[('', 'جلالة/NN'), ('', 'الملك/DTNN'), ('', 'يستقبل/VBP'), ('', 'وزير/NN'), ('', 'الخارجية/DTNN'), ('', 'التركي/DTJJ'), ('', 'ويؤكد/NNP'), ('', 'ضرورة/NN'), ('', 'الوقف/DTNN'), ('', 'الفوري/DTJJ'), ('', 'لإطلاق/NN'), ('', 'النار/DTNN'), ('', 'في/IN'), ('', 'غزة/NNP'), ('', 'استقبل/VBD'), ('', 'جلالة/NN'), ('', 'الملك/DTNN'), ('', 'عبدالله/NNP'), ('الثاني/ADJ', 'NUM'), ('', 'في/IN'), ('', 'قصر/NN'…	['Conflicting Emotions Detected']	جلال ملك يستقبل زير خارج ترك يوكد ضرور وقف فور اطلاق نار غز استقبل جلال ملك عبدالل ثان قصر حسين يوم خميس زير خارج ترك هاكا يدا جرى خلال لقاء بحث جهود مبذول لوقف حرب غز والحد تفاقم اوضاع انسان ماساو قطاع معرب جلال تقدير مواقف ترك ثابت جهود انهاء حرب اكد جلال ملك اهم تنسيق وثيق بلد ناء جهود لجن وزار مكلف القم عرب اسلام مشترك تحرك دول لوقف حرب غز جدد جلال تاكيد ضرور دفع لوقف فور اطلاق نار غز حما مدن…		Government		Diplomacy Relations		Real
إطلاق ورشة تدريبية حول صناعة المحتوى في الإعلام الرقمي الأردن غزة	Education	Training	Real		Education	Training	Real	إطلاق ورشة تدريبية حول صناعة المحتوى في الإعلام الرقمي الأردن غزة	[('', 'إطلاق/NN'), ('', 'ورشة/NN'), ('', 'تدريبية/JJ'), ('', 'حول/NN'), ('', 'صناعة/NN'), ('', 'المحتوى/DTNN'), ('', 'في/IN'), ('', 'الإعلام/DTNN'), ('', 'الرقمي/DTJJ'), ('', 'الأردن/DTJJ'), ('', 'التلفزيون/DTNN'), ('', 'الأردني/DTJJ'), ('', 'غزة/NNP')]	['سعادة']	اطلاق ورش تدريب حول صناع محتوى اعلام رقم ارد تلفز اردن غز		Education		Training		Real
الصحة العالمية الكارثة الإنسانية في غزة تزداد سوءا والنظام الصحي ينهار الأردن غزة	Health	Israeli-Palestinian Conflict	Real		Health	Israeli-Palestinian Conflict	Real	الصحة العالمية الكارثة الإنسانية في غزة تزداد سوءا والنظام الصحي ينهار الأردن غزة	[('', 'الصحة/DTNN'), ('', 'العالمية/DTJJ'), ('', 'الكارثة/DTNN'), ('', 'الإنسانية/DTJJ'), ('', 'في/IN'), ('', 'غزة/NNP'), ('', 'تزداد/VBP'), ('', 'سوءا/NN'), ('', 'والنظام/NN'), ('', 'الصحي/DTJJ'), ('', 'ينهار/VBP'), ('', 'الأردن/DTNN'), ('', 'التلفزيون/DTNN'), ('', 'الأردني/DTJJ'), ('', 'غزة/NNP')]	['غضب']	الصح عالم كارث انسان غز تزداد سوء نظام الصح ينهار ارد تلفز اردن غز		Health		Israeli-Palestinian Conflict		Real
تطورات المشهد في قطاع غزة ميدانيا وإنسانيا فضل طهبوب الكاتب والمحلل السياسي الأردن غزة	Politics	Israeli-Palestinian Conflict	Real		Politics	Israeli-Palestinian Conflict	Real	تطورات المشهد في قطاع غزة ميدانيا وإنسانيا فضل طهبوب الكاتب والمحلل السياسي الأردن غزة	[('', 'تطورات/NNS'), ('', 'المشهد/DTNN'), ('', 'في/IN'), ('', 'قطاع/NN'), ('', 'غزة/NNP'), ('', 'ميدانيا/NN'), ('', 'وإنسانيا/JJ'), ('', 'فضل/NN'), ('', 'طهبوب/NN'), ('', 'الكاتب/DTNN'), ('', 'والمحلل/NN'), ('', 'السياسي/DTNN'), ('', 'الأردن/DTJJ'), ('', 'التلفزيون/DTNN'), ('', 'الأردني/DTJJ'), ('', 'غزة/NNP')]	['حزن']	تطور مشهد قطاع غز ميدان انسان فضل طهبوب كاتب محلل سياس ارد تلفز اردن غز		Politics		Israeli-Palestinian Conflict		Real
لن يحقق الكيان الإسرائيلي أيا من أهدافه التي أعلنها د حسن الدعجة أستاذ الدراسات الإستراتيجية الأردن غزة	Politics	Israeli-Palestinian Conflict	Real		Politics	Israeli-Palestinian Conflict	Real	لن يحقق الكيان الإسرائيلي أيا من أهدافه التي أعلنها د حسن الدعجة أستاذ الدراسات الإستراتيجية الأردن غزة	[('', 'لن/RP'), ('', 'يحقق/VBP'), ('', 'الكيان/DTNN'), ('', 'الإسرائيلي/DTJJ'), ('', 'أيا/VBD'), ('', 'من/IN'), ('', 'أهدافه/NNP'), ('', 'التي/WP'), ('', 'أعلنها/VBD'), ('', 'د/NN'), ('', 'حسن/NN'), ('', 'الدعجة/DTNN'), ('', 'أستاذ/NN'), ('', 'الدراسات/DTNNS'), ('', 'الإستراتيجية/DTJJ'), ('', 'الأردن/DTJJ'), ('', 'التلفزيون/DTNN'), ('', 'الأردني/DTJJ'), ('', 'غزة/NNP')]	['No Emotion Detected']	يحقق الك اسراييل اهداف اعل حسن دعج استاذ دراس استراتيج ارد تلفز اردن غز		Politics		Israeli-Palestinian Conflict		Real
شهيدا في قصف إسرائيلي لمنزل في رفح الأردن غزة	Politics	Israeli-Palestinian Conflict	Real		Politics	Israeli-Palestinian Conflict	Real	شهيدا في قصف إسرائيلي لمنزل في رفح الأردن غزة	[('', 'شهيدا/NN'), ('', 'في/IN'), ('', 'قصف/NN'), ('', 'إسرائيلي/NNS'), ('', 'لمنزل/JJ'), ('', 'في/IN'), ('', 'رفح/NNP'), ('', 'الأردن/DTNNP'), ('', 'التلفزيون/DTNN'), ('', 'الأردني/DTJJ'), ('', 'غزة/NNP')]	['No Emotion Detected']	شهيد قصف اسراييل منزل رفح ارد تلفز اردن غز		Politics		Israeli-Palestinian Conflict		Real
قوات الإحتلال تقتحم مدنا عدة في الضفة الغربية نوال حجازي مراسلة في الضفة الأردن غزة	Politics	Israeli-Palestinian Conflict	Real		Politics	Israeli-Palestinian Conflict	Real	قوات الإحتلال تقتحم مدنا عدة في الضفة الغربية نوال حجازي مراسلة في الضفة الأردن غزة	[('', 'قوات/NNS'), ('', 'الإحتلال/DTNN'), ('', 'تقتحم/VBP'), ('', 'مدنا/NN'), ('', 'عدة/JJ'), ('', 'في/IN'), ('', 'الضفة/DTNNP'), ('', 'الغربية/DTJJ'), ('', 'نوال/NNP'), ('', 'حجازي/NNP'), ('', 'مراسلة/NN'), ('', 'التلفزيون/DTNN'), ('', 'الأردني/DTJJ'), ('', 'في/IN'), ('', 'الضفة/DTNNP'), ('', 'الأردن/DTJJ'), ('', 'التلفزيون/DTNN'), ('', 'الأردني/DTJJ'), ('', 'غزة/NNP')]	['No Emotion Detected']	قوا احتلال تقتحم مدن عد الضف غرب نوال حجاز مراسل تلفز اردن الضف ارد تلفز اردن غز		Politics		Israeli-Palestinian Conflict		Real
المعونة الوطنية تدريب منتهي بالتشغيل في قطاع الطاقة المتجددة أيمن الرباع المساعد للشؤون الفنية والفروع صندوق المعونة الوطنية الأردن يحدث اليوم	Economy	Employment	Real		Economy	Employment	Real	المعونة الوطنية تدريب منتهي بالتشغيل في قطاع الطاقة المتجددة أيمن الرباع المساعد للشؤون الفنية والفروع صندوق المعونة الوطنية الأردن يحدث اليوم	[('', 'المعونة/DTNN'), ('', 'الوطنية/DTJJ'), ('', 'تدريب/NN'), ('', 'منتهي/JJ'), ('', 'بالتشغيل/JJ'), ('', 'في/IN'), ('', 'قطاع/NN'), ('', 'الطاقة/DTNN'), ('', 'المتجددة/DTJJ'), ('', 'أيمن/VBD'), ('', 'الرباع/DTNN'), ('', 'المساعد/DTJJ'), ('', 'للشؤون/NNP'), ('', 'الفنية/DTJJ'), ('', 'والفروع/NN'), ('', 'صندوق/NN'), ('', 'المعونة/DTNN'), ('', 'الوطنية/DTJJ'), ('', 'التلفزيون/DTNN'), ('', 'الأردني…	['مفاجأه']	معون وطن تدريب منت تشغيل قطاع طاق متجدد ايم رباع مساعد للشء الفن فروع صندوق معون وطن تلفز اردن ارد يحدث يوم		Economy		Employment		Real
عاجل مؤتمر صحفي لنائب رئيس الوزراء وزير الخارجية وشؤون المغتربين أيمن الصفدي ونظيره التركي هاكان فيدان وزير الخارجية الأردني على إسرائيل السماح للنازحين في غزة بالعودة إلى ديارهم عملنا القادم قائم على تفنيد الرواية الإسرائيلية والتحذير من الحرب وما سينتج عنها مستمرون في حشد الموقف الدولي القائم على الضغط لإيقاف الحرب على غزة وبدأنا نلاحظ تغيرا في هذا الموقف جهدنا مركز على أن تكون أي مقاربة منطلقة…	Politics	Israeli-Palestinian Conflict	Real		Politics	Israeli-Palestinian Conflict	Real	عاجل مؤتمر صحفي لنائب رئيس الوزراء وزير الخارجية وشؤون المغتربين أيمن الصفدي ونظيره التركي هاكان فيدان وزير الخارجية الأردني على إسرائيل السماح للنازحين في غزة بالعودة إلى ديارهم عملنا القادم قائم على تفنيد الرواية الإسرائيلية والتحذير من الحرب وما سينتج عنها مستمرون في حشد الموقف الدولي القائم على الضغط لإيقاف الحرب على غزة وبدأنا نلاحظ تغيرا في هذا الموقف جهدنا مركز على أن تكون أي مقاربة منطلقة…	[('', 'عاجل/JJ'), ('', 'مؤتمر/NN'), ('', 'صحفي/JJ'), ('', 'لنائب/NN'), ('', 'رئيس/NN'), ('', 'الوزراء/DTNN'), ('', 'وزير/NN'), ('', 'الخارجية/DTNN'), ('', 'وشؤون/NNP'), ('', 'المغتربين/DTNNS'), ('', 'أيمن/VBD'), ('', 'الصفدي/DTNNP'), ('', 'ونظيره/NNP'), ('', 'التركي/DTJJ'), ('', 'هاكان/NNP'), ('', 'فيدان/NNP'), ('', 'وزير/NN'), ('', 'الخارجية/DTNN'), ('', 'الأردني/DTJJ'), ('', 'على/IN'), ('', 'إس…	['حزن']	عاجل موتمر صحف نايب رييس وزراء زير خارج شوو مغترب ايم صفد نظير ترك هاكا يدا زير خارج اردن اسراييل سماح نازح غز عود ديار عمل قادم قايم تفنيد روا اسراييل تحذير حرب سينتج عنه مستمر حشد موقف دول قايم ضغط ايقاف حرب غز بدء نلاحظ تغير موقف جهد مركز تكو مقارب منطلق انهاء احتلال اسراييل اقام دول سطين تحقيق خط سلام شامل واضح ارد تلفز اردن		Politics		Israeli-Palestinian Conflict		Real
عاجل مؤتمر صحفي لنائب رئيس الوزراء وزير الخارجية وشؤون المغتربين أيمن الصفدي ونظيره التركي هاكان فيدان وزير الخارجية التركي الرأي العام الدولي يشدد على ضرورة توقف الهجمات والاعتداءات الإسرائيلية فورا الحفاظ على قدسية المسجد الأقصى خطا أحمر للمسلمين جميعا نتابع بكل تقدير الخطوات التي خطاها الأردن في مجال التحديث خلال السنوات الماضية مستعدون للقيام بدور من أجل تخفيض التوتر بين باكستان وإيران نهتم ج…	Politics	Israeli-Palestinian Conflict	Real		Politics	Israeli-Palestinian Conflict	Real	عاجل مؤتمر صحفي لنائب رئيس الوزراء وزير الخارجية وشؤون المغتربين أيمن الصفدي ونظيره التركي هاكان فيدان وزير الخارجية التركي الرأي العام الدولي يشدد على ضرورة توقف الهجمات والاعتداءات الإسرائيلية فورا الحفاظ على قدسية المسجد الأقصى خطا أحمر للمسلمين جميعا نتابع بكل تقدير الخطوات التي خطاها الأردن في مجال التحديث خلال السنوات الماضية مستعدون للقيام بدور من أجل تخفيض التوتر بين باكستان وإيران نهتم ج…	[('', 'عاجل/JJ'), ('', 'مؤتمر/NN'), ('', 'صحفي/JJ'), ('', 'لنائب/NN'), ('', 'رئيس/NN'), ('', 'الوزراء/DTNN'), ('', 'وزير/NN'), ('', 'الخارجية/DTNN'), ('', 'وشؤون/NNP'), ('', 'المغتربين/DTNNS'), ('', 'أيمن/VBD'), ('', 'الصفدي/DTNNP'), ('', 'ونظيره/NNP'), ('', 'التركي/DTJJ'), ('', 'هاكان/NNP'), ('', 'فيدان/NNP'), ('', 'وزير/NN'), ('', 'الخارجية/DTNN'), ('', 'التركي/DTJJ'), ('', 'الرأي/DTNN'), ('', …	['Conflicting Emotions Detected']	عاجل موتمر صحف نايب رييس وزراء زير خارج شوو مغترب ايم صفد نظير ترك هاكا يدا زير خارج ترك الرء عام دول يشدد ضرور توقف هجم اعتداء اسراييل فور حفاظ قدس مسجد اقصى خطا احمر مسلم جميع نتابع بكل تقدير خطو خطا ارد مجال تحديث خلال سنو ماض مستعد قيام دور تخفيض توتر اكست اير نهتم جدا تنسيق تشاور ارد يتعلق قضا منطق نتابع معه تطور وضع قطاع غز ارد جزير استقرار منطق عرب نحتاج مسا منطق دايم مقبول اطلاق تبرير اسر…		Politics		Israeli-Palestinian Conflict		Real
عاجل مؤتمر صحفي لنائب رئيس الوزراء وزير الخارجية وشؤون المغتربين أيمن الصفدي ونظيره التركي هاكان فيدان وزير الخارجية الأردني نعمل على توسيع العلاقات الأخوية مع تركيا وفقا لتوجيهات جلالة الملك التنسيق بين الأردن وتركيا على مدى أشهر الحرب على غزة كان شبه يومي المجتمع الدولي يدعم حل الدولتين لحل الصراع في المنطقة واسرائيل ترفض هذا الحل وتتنكر له مواقفنا وتركيا واضحة في رفض التهجير وضرورة وقف الحرب ع…	Politics	Israeli-Palestinian Conflict	Real		Politics	Israeli-Palestinian Conflict	Real	عاجل مؤتمر صحفي لنائب رئيس الوزراء وزير الخارجية وشؤون المغتربين أيمن الصفدي ونظيره التركي هاكان فيدان وزير الخارجية الأردني نعمل على توسيع العلاقات الأخوية مع تركيا وفقا لتوجيهات جلالة الملك التنسيق بين الأردن وتركيا على مدى أشهر الحرب على غزة كان شبه يومي المجتمع الدولي يدعم حل الدولتين لحل الصراع في المنطقة واسرائيل ترفض هذا الحل وتتنكر له مواقفنا وتركيا واضحة في رفض التهجير وضرورة وقف الحرب ع…	[('', 'عاجل/JJ'), ('', 'مؤتمر/NN'), ('', 'صحفي/JJ'), ('', 'لنائب/NN'), ('', 'رئيس/NN'), ('', 'الوزراء/DTNN'), ('', 'وزير/NN'), ('', 'الخارجية/DTNN'), ('', 'وشؤون/NNP'), ('', 'المغتربين/DTNNS'), ('', 'أيمن/VBD'), ('', 'الصفدي/DTNNP'), ('', 'ونظيره/NNP'), ('', 'التركي/DTJJ'), ('', 'هاكان/NNP'), ('', 'فيدان/NNP'), ('', 'وزير/NN'), ('', 'الخارجية/DTNN'), ('', 'الأردني/DTJJ'), ('', 'نعمل/VBP'), ('', '…	['Conflicting Emotions Detected']	عاجل موتمر صحف نايب رييس وزراء زير خارج شوو مغترب ايم صفد نظير ترك هاكا يدا زير خارج اردن نعمل توسيع علاق اخو ترك وفق توجيه جلال ملك تنسيق ارد ترك مدى اشهر حرب غز يوم مجتمع دول يدعم حل دولت لحل صراع منطق واسراييل ترفض الحل تتنكر مواقف ترك واضح رفض تهجير ضرور وقف حرب غز ضما صول مساعد فلسطن نحذر استمرار صراع يمك يجر منطق مزيد توتر تصعيد نعمل ترك منطلق موقف يريد سلام عادل منطق يضم حقوق شعب فلسطين ار…		Politics		Israeli-Palestinian Conflict		Real
مباشر مؤتمر صحفي لوزير الخارجية وشؤون المغتربين ونظيره التركي الأردن	Politics	International Relations	Real		Politics	International Relations	Real	مباشر مؤتمر صحفي لوزير الخارجية وشؤون المغتربين ونظيره التركي الأردن	[('', 'مباشر/NN'), ('', 'مؤتمر/NN'), ('', 'صحفي/JJ'), ('', 'لوزير/NNP'), ('', 'الخارجية/DTJJ'), ('', 'وشؤون/NN'), ('', 'المغتربين/DTNNS'), ('', 'ونظيره/NNP'), ('', 'التركي/DTJJ'), ('', 'الأردن/DTNN'), ('', 'التلفزيون/DTNN'), ('', 'الأردني/DTJJ')]	['اشمئزاز']	مباشر موتمر صحف وزير خارج شوو مغترب نظير ترك ارد تلفز اردن		Politics		International Relations		Real
مباشر نشرة أخبار منتصف النهار الأردن	Media	General	Real		Media	General	Real	مباشر نشرة أخبار منتصف النهار الأردن	[('', 'مباشر/NN'), ('', 'نشرة/NN'), ('', 'أخبار/NN'), ('', 'منتصف/NN'), ('', 'النهار/DTNN'), ('', 'الأردن/DTJJ'), ('', 'التلفزيون/DTNN'), ('', 'الأردني/DTJJ')]	['اشمئزاز']	مباشر نشر اخبار منتصف نهار ارد تلفز اردن		Media		General		Real
الصحة العالمية لا دليل على استخدام مستشفيات غزة لأغراض أخرى الأردن غزة	Health	Medical Services	Real		Health	Medical Services	Real	الصحة العالمية لا دليل على استخدام مستشفيات غزة لأغراض أخرى الأردن غزة	[('', 'الصحة/DTNN'), ('', 'العالمية/DTJJ'), ('', 'لا/RP'), ('', 'دليل/NN'), ('', 'على/IN'), ('', 'استخدام/NN'), ('', 'مستشفيات/NNS'), ('', 'غزة/NNP'), ('', 'لأغراض/NNP'), ('', 'أخرى/VBD'), ('', 'الأردن/DTNN'), ('', 'التلفزيون/DTNN'), ('', 'الأردني/DTJJ'), ('', 'غزة/NNP')]	['No Emotion Detected']	الصح عالم دليل استخدام مستشف غز اغراض اخرى ارد تلفز اردن غز		Health		Medical Services		Real
منظمة الهجرة الدولية أكثر من مليون شخص نزحوا في السودان منذ بدء القتال بين الجيش وقوات الدعم السريع في الـ من نيسان الماضي الأردن	Politics	International	Real		Politics	International	Real	منظمة الهجرة الدولية أكثر من مليون شخص نزحوا في السودان منذ بدء القتال بين الجيش وقوات الدعم السريع في الـ من نيسان الماضي الأردن	[('', 'منظمة/NN'), ('', 'الهجرة/DTNN'), ('', 'الدولية/DTJJ'), ('', 'أكثر/VBD'), ('', 'من/IN'), ('', 'مليون/CD'), ('', 'شخص/NN'), ('', 'نزحوا/VBD'), ('', 'في/IN'), ('', 'السودان/DTNNP'), ('', 'منذ/IN'), ('', 'بدء/NN'), ('', 'القتال/DTNN'), ('', 'بين/NN'), ('', 'الجيش/DTNN'), ('', 'وقوات/NNS'), ('', 'الدعم/DTNN'), ('', 'السريع/DTJJ'), ('', 'في/IN'), ('', 'الـ/DTNN'), ('', 'من/IN'), ('', 'نيسان/NNP'…	['حب']	منظم هجر دول مليو شخص نزحو سود بدء قتال جيش وقو دعم سريع ال ماض ارد تلفز اردن		Politics		International		Real
الأرصاد الجوية علميا لانستطيع الجزم بقدوم منخفض جوي مصحوب بالثلوج ما زال الوقت مبكرا حتى الآن مساعد أحمد متنبئ جوي من دائرة الأرصاد الجوية الأردن يوم جديد	Weather	Forecast	Real		Weather	Forecast	Real	الأرصاد الجوية علميا لانستطيع الجزم بقدوم منخفض جوي مصحوب بالثلوج ما زال الوقت مبكرا حتى الآن مساعد أحمد متنبئ جوي من دائرة الأرصاد الجوية الأردن يوم جديد	[('', 'الأرصاد/DTNN'), ('', 'الجوية/DTJJ'), ('', 'علميا/NN'), ('', 'لانستطيع/JJ'), ('', 'الجزم/DTNN'), ('', 'بقدوم/NNP'), ('', 'منخفض/NN'), ('', 'جوي/JJ'), ('', 'مصحوب/JJ'), ('', 'بالثلوج/NN'), ('', 'ما/RP'), ('', 'زال/VBD'), ('', 'الوقت/DTNN'), ('', 'مبكرا/JJ'), ('', 'حتى/IN'), ('', 'الآن/DTNN'), ('', 'مساعد/NN'), ('', 'أحمد/NN'), ('', 'متنبئ/JJ'), ('', 'جوي/JJ'), ('', 'من/IN'), ('', 'دائرة/NN')…	['No Emotion Detected']	ارصاد الجو علم انستطيع جزم قدوم منخفض جو مصحوب ثلوج زال الو مبكر مساعد احمد متنبء جو داير ارصاد الجو تلفز اردن ارد يوم جديد		Weather		Forecast		Real
إصابة جنود إسرائيليين ونقلهم لمستشفى بعسقلان بعد انقلاب زورقهم خلال مهمة الليلة الماضية الأردن	Politics	Israeli-Palestinian Conflict	Real		Politics	Israeli-Palestinian Conflict	Real	إصابة جنود إسرائيليين ونقلهم لمستشفى بعسقلان بعد انقلاب زورقهم خلال مهمة الليلة الماضية الأردن	[('', 'إصابة/NN'), ('', 'جنود/NN'), ('', 'إسرائيليين/JJ'), ('', 'ونقلهم/NN'), ('', 'لمستشفى/NNP'), ('', 'بعسقلان/NNP'), ('', 'بعد/NN'), ('', 'انقلاب/NN'), ('', 'زورقهم/NNP'), ('', 'خلال/NN'), ('', 'مهمة/NN'), ('', 'الليلة/DTNN'), ('', 'الماضية/DTJJ'), ('', 'الأردن/DTJJ'), ('', 'التلفزيون/DTNN'), ('', 'الأردني/DTJJ')]	['Conflicting Emotions Detected']	اصاب جنود اسراييل نقل مستشفى عسقل انقلاب زورق خلال مهم ليل ماض ارد تلفز اردن		Politics		Israeli-Palestinian Conflict		Real
وزير الاتصال الحكومي الناطق الرسمي باسم الحكومة الدكتور مهند المبيضين الاعتداء على محيط المستشفى الميداني الأردني في خان يونس لن يغير الرسالة الأردنية أو من الدور الأردني الإنساني والإغاثي تجاه القضية الفلسطينية والأهل في قطاع غزة الأردن	Health	Israeli-Palestinian Conflict	Real		Health	Israeli-Palestinian Conflict	Real	وزير الاتصال الحكومي الناطق الرسمي باسم الحكومة الدكتور مهند المبيضين الاعتداء على محيط المستشفى الميداني الأردني في خان يونس لن يغير الرسالة الأردنية أو من الدور الأردني الإنساني والإغاثي تجاه القضية الفلسطينية والأهل في قطاع غزة الأردن	[('', 'وزير/NN'), ('', 'الاتصال/DTNN'), ('', 'الحكومي/DTJJ'), ('', 'الناطق/DTNN'), ('', 'الرسمي/DTJJ'), ('', 'باسم/NNP'), ('', 'الحكومة/DTNN'), ('', 'الدكتور/DTNN'), ('', 'مهند/NNP'), ('', 'المبيضين/DTJJ'), ('', 'الاعتداء/DTNN'), ('', 'على/IN'), ('', 'محيط/NN'), ('', 'المستشفى/DTNN'), ('', 'الميداني/DTJJ'), ('', 'الأردني/DTJJ'), ('', 'في/IN'), ('', 'خان/NNP'), ('', 'يونس/NNP'), ('', 'لن/RP'), (''…	['No Emotion Detected']	زير اتصال حكوم ناطق رسم اسم حكوم دكتور مهند مبيض اعتداء محيط مستشفى ميدان اردن خان يونس يغير رسال اردن دور اردن انسان اغاث القض فلسطين اهل قطاع غز ارد تلفز اردن		Health		Israeli-Palestinian Conflict		Real
إرتفاع على درجات الحرارة وأجواء لطيفة حتى الأحد بإذن الله يوم جديد	Weather	Forecast	Real		Weather	Forecast	Real	إرتفاع على درجات الحرارة وأجواء لطيفة حتى الأحد بإذن الله يوم جديد	[('', 'إرتفاع/VBN'), ('', 'على/IN'), ('', 'درجات/NNS'), ('', 'الحرارة/DTNN'), ('', 'وأجواء/NN'), ('', 'لطيفة/JJ'), ('', 'حتى/IN'), ('', 'الأحد/DTNN'), ('', 'بإذن/NNP'), ('', 'الله/NNP'), ('', 'التلفزيون/DTNN'), ('', 'الأردني/DTJJ'), ('', 'يوم/NN'), ('', 'جديد/JJ')]	['No Emotion Detected']	ارتفاع درج حرار اجواء لطيف احد باذ الله تلفز اردن يوم جديد		Weather		Forecast		Real
بتوجيهات ملكية إخلاء مصاب المستشفى الميداني الأردني الخاص بتوجيهات ملكية سامية أخلت القوات المسلحة الأردنية ــ الجيش العربي مصاب المستشفى الميداني الأردني الخاص في خان يونس جنوب قطاع غزة إلى مدينة الحسين الطبية مساء أمس الأربعاء بعد تعرضه لإصابة بمنطقة الفخذ الأيمن واليد اليمنى نتيجة للاشتباكات في محيط المستشفى وكان في استقباله مساعد رئيس هيئة الأركان المشتركة للعمليات والتدريب للاطمئنان على حالة…	Health	Israeli-Palestinian Conflict	Real		Health	Israeli-Palestinian Conflict	Real	بتوجيهات ملكية إخلاء مصاب المستشفى الميداني الأردني الخاص بتوجيهات ملكية سامية أخلت القوات المسلحة الأردنية ــ الجيش العربي مصاب المستشفى الميداني الأردني الخاص في خان يونس جنوب قطاع غزة إلى مدينة الحسين الطبية مساء أمس الأربعاء بعد تعرضه لإصابة بمنطقة الفخذ الأيمن واليد اليمنى نتيجة للاشتباكات في محيط المستشفى وكان في استقباله مساعد رئيس هيئة الأركان المشتركة للعمليات والتدريب للاطمئنان على حالة…	[('', 'بتوجيهات/NNS'), ('', 'ملكية/NN'), ('', 'إخلاء/NN'), ('', 'مصاب/NN'), ('', 'المستشفى/DTNN'), ('', 'الميداني/DTJJ'), ('', 'الأردني/DTJJ'), ('', 'الخاص/DTJJ'), ('', 'بتوجيهات/NNS'), ('', 'ملكية/NN'), ('', 'سامية/JJ'), ('', 'أخلت/VBD'), ('', 'القوات/DTNNS'), ('', 'المسلحة/DTJJ'), ('', 'الأردنية/DTJJ'), ('', 'ــ/VBD'), ('', 'الجيش/DTNN'), ('', 'العربي/DTJJ'), ('', 'مصاب/NN'), ('', 'المستشفى/DTN…	['Conflicting Emotions Detected']	توجيه ملك اخلاء مصاب مستشفى ميدان اردن خاص توجيه ملك سام اخل القو مسلح اردن جيش عرب مصاب مستشفى ميدان اردن خاص خان يونس جنوب قطاع غز مدين الحس الطب اربعاء تعرض اصاب منطق فخذ ايم واليد يمنى نتيج اشتباك محيط مستشفى وكا استقبال مساعد رييس هيء ارك مشترك عمل تدريب اطمين حال مصاب اول وال كان مستقر سيتم عمل فحوص مخبر شعاع ادخال قسم معن متابع حال الصح يشار ارسال مستشفى ميدان خاص خان يونس جنوب قطاع غز جاء…		Health		Israeli-Palestinian Conflict		Real
وسائل إعلام أمريكي الولايات المتحدة نفذت جولة رابعة من الضربات ضد أهداف للحوثيين في اليمن الأربعاء	Military	USA issues	Real		Military	USA issues	Real	وسائل إعلام أمريكي الولايات المتحدة نفذت جولة رابعة من الضربات ضد أهداف للحوثيين في اليمن الأربعاء	[('', 'وسائل/NN'), ('', 'إعلام/NN'), ('', 'أمريكي/JJ'), ('', 'الولايات/DTNNS'), ('', 'المتحدة/DTJJ'), ('', 'نفذت/VBD'), ('', 'جولة/NN'), ('رابعة/ADJ', 'NUM'), ('', 'من/IN'), ('', 'الضربات/DTNNS'), ('', 'ضد/NN'), ('', 'أهداف/NN'), ('', 'للحوثيين/JJ'), ('', 'في/IN'), ('', 'اليمن/DTNNP'), ('', 'الأربعاء/DTNN')]	['No Emotion Detected']	سايل اعلام امر ولا متحد نفذ جول رابع ضرب ضد اهداف حوث يمن اربعاء		Military		USA issues		Real
القوات المسلحة ترسل طائرتي مساعدات إلى غزة استمراراً لتنفيذ التوجيهات الملكية السامية أرسلت خلية المساعدات الإنسانية والإغاثية في القوات المسلحة الأردنية ــ الجيش العربي اليوم الأربعاء بالتنسيق مع الهيئة الخيرية الأردنية الهاشمية ووزارة الخارجية وشؤون المغتربين طائرتي مساعدات إغاثية لمساندة الأهل في قطاع غزة وتضم الطائرتان مساعدات إغاثية وغذائية ومستهلكات طبية لتقديم الدعم والمساندة للأهل في قطاع…	Military	Aid	Real		Humanitarian	Aid	Real	القوات المسلحة ترسل طائرتي مساعدات إلى غزة استمراراً لتنفيذ التوجيهات الملكية السامية أرسلت خلية المساعدات الإنسانية والإغاثية في القوات المسلحة الأردنية ــ الجيش العربي اليوم الأربعاء بالتنسيق مع الهيئة الخيرية الأردنية الهاشمية ووزارة الخارجية وشؤون المغتربين طائرتي مساعدات إغاثية لمساندة الأهل في قطاع غزة وتضم الطائرتان مساعدات إغاثية وغذائية ومستهلكات طبية لتقديم الدعم والمساندة للأهل في قطاع…	[('', 'القوات/DTNNS'), ('', 'المسلحة/DTJJ'), ('', 'ترسل/VBP'), ('', 'طائرتي/NNS'), ('', 'مساعدات/NNS'), ('', 'إلى/VBD'), ('', 'غزة/NNP'), ('', 'استمرارا/NN'), ('', 'لتنفيذ/NN'), ('', 'التوجيهات/DTNNS'), ('', 'الملكية/DTJJ'), ('', 'السامية/DTJJ'), ('', 'أرسلت/VBD'), ('', 'خلية/NN'), ('', 'المساعدات/DTNNS'), ('', 'الإنسانية/DTJJ'), ('', 'والإغاثية/JJ'), ('', 'في/IN'), ('', 'القوات/DTNNS'), ('', 'ال…	['Conflicting Emotions Detected']	القو مسلح ترسل طاء مساعد غز استمرار تنفيذ توجيه ملك سام ارسل خل مساعد انسان اغاث القو مسلح اردن جيش عرب يوم اربعاء تنسيق هيء خير اردن هاشم وزار خارج شوو مغترب طاء مساعد اغاث مساند اهل قطاع غز تضم طايرت مساعد اغاث غذاء مستهلك طب تقديم دعم مساند اهل قطاع غز تخفيف عنهم جراء يتعرض ظروف صعب نتيج استمرار حرب اسراييل مستعر قطاع ويء ارسال طايرت ضمن جهود تبذل قياد عام للقو مسلح اردن جيش عرب وقوف جانب اهل …		Military		Aid		Real
جلالة الملك عبدالله الثاني القائد الأعلى للقوات المسلحة خلال زيارته اليوم إلى قيادة المنطقة العسكرية الشرقية الأردن	Military	Local	Real		Military	Local	Real	جلالة الملك عبدالله الثاني القائد الأعلى للقوات المسلحة خلال زيارته اليوم إلى قيادة المنطقة العسكرية الشرقية الأردن	[('', 'جلالة/NN'), ('', 'الملك/DTNN'), ('', 'عبدالله/NNP'), ('الثاني/ADJ', 'NUM'), ('', 'القائد/DTNN'), ('', 'الأعلى/DTJJ'), ('', 'للقوات/NNS'), ('', 'المسلحة/DTJJ'), ('', 'خلال/NN'), ('', 'زيارته/NN'), ('', 'اليوم/DTNN'), ('', 'إلى/VBD'), ('', 'قيادة/NN'), ('', 'المنطقة/DTNN'), ('', 'العسكرية/DTJJ'), ('', 'الشرقية/DTJJ'), ('', 'الأردن/DTJJ')]	['سعادة']	جلال ملك عبدالل ثان قايد اعلى للقو مسلح خلال زيار يوم قياد منطق عسكر شرق ارد		Military		Local		Real
مسارات المستشفى الميداني في خانيونس يُستهدف مجددا ضيوف الحلقة عضو مجلس الاعيان مصطفى الرواشدة و الدكتور محمد القضاة عميد كلية الاداب في الجامعة الاردنية وسيكون معنا عبر الهاتف العميد د عصر الهروط قائد الطب الميداني في الخدمات الطبية الملكية الخبير العسكري الدكتور هشام خريسات لواء متقاعد لمتابعة الحلقة كاملة إتبع الرابط مسارات غزة	Health	Israeli-Palestinian Conflict	Real		Health	Israeli-Palestinian Conflict	Real	مسارات المستشفى الميداني في خانيونس يُستهدف مجددا ضيوف الحلقة عضو مجلس الاعيان مصطفى الرواشدة و الدكتور محمد القضاة عميد كلية الاداب في الجامعة الاردنية وسيكون معنا عبر الهاتف العميد د عصر الهروط قائد الطب الميداني في الخدمات الطبية الملكية الخبير العسكري الدكتور هشام خريسات لواء متقاعد لمتابعة الحلقة كاملة إتبع الرابط مسارات غزة	[('', 'مسارات/NNS'), ('', 'المستشفى/DTNN'), ('', 'الميداني/DTJJ'), ('', 'في/IN'), ('', 'خانيونس/NNP'), ('', 'يستهدف/VBP'), ('', 'مجددا/NN'), ('', 'ضيوف/NN'), ('', 'الحلقة/DTNN'), ('', 'عضو/NN'), ('', 'مجلس/NN'), ('', 'الاعيان/DTNN'), ('', 'مصطفى/NNP'), ('', 'الرواشدة/DTNN'), ('', 'و/CC'), ('', 'الدكتور/DTNN'), ('', 'محمد/NNP'), ('', 'القضاة/DTNN'), ('', 'عميد/NN'), ('', 'كلية/NN'), ('', 'الاداب/D…	['حزن']	مسار مستشفى ميدان خانيونس يستهدف مجدد ضيوف حلق عضو مجلس الاع مصطفى رواشد دكتور محمد قضا عميد كل اداب جامع اردن سيك معن عبر هاتف عميد عصر هروط قايد الطب ميدان خدم الطب ملك خبير عسكر دكتور هشام خريس لواء متقاعد متابع حلق كامل اتبع رابط ارد تلفز اردن مسار غز		Health		Israeli-Palestinian Conflict		Real
مسارات قائد الطب الميداني العميد الدكتور عصر الهروط تم إخلاء المصاب العسكري من خان يونس وبأنتظار وصوله الى أرض الوطن نشامى القوات المسلحة دائماً على الوعد والعهد ومستمرين في تقديم العون والمساعدة الطبية الى الأشقاء في قطاع غزة يصنف المستشفى الأردني الخاص في خان يونس من مستشفيات الدرجة الثالثة لتواجد جميع الإختصاصات فيه يوجد خمس مستشفيات أردنية عاملة في الضفة الغربية وقطاع وغزة الاردن الجيش العربي…	Health	Israeli-Palestinian Conflict	Real		Health	Israeli-Palestinian Conflict	Real	مسارات قائد الطب الميداني العميد الدكتور عصر الهروط تم إخلاء المصاب العسكري من خان يونس وبأنتظار وصوله الى أرض الوطن نشامى القوات المسلحة دائماً على الوعد والعهد ومستمرين في تقديم العون والمساعدة الطبية الى الأشقاء في قطاع غزة يصنف المستشفى الأردني الخاص في خان يونس من مستشفيات الدرجة الثالثة لتواجد جميع الإختصاصات فيه يوجد خمس مستشفيات أردنية عاملة في الضفة الغربية وقطاع وغزة الاردن الجيش العربي…	[('', 'مسارات/NNS'), ('', 'قائد/NN'), ('', 'الطب/DTNN'), ('', 'الميداني/DTJJ'), ('', 'العميد/DTNN'), ('', 'الدكتور/DTNN'), ('', 'عصر/NN'), ('', 'الهروط/DTNN'), ('', 'تم/VBD'), ('', 'إخلاء/NN'), ('', 'المصاب/DTNN'), ('', 'العسكري/DTJJ'), ('', 'من/IN'), ('', 'خان/NN'), ('', 'يونس/NNP'), ('', 'وبأنتظار/NNP'), ('', 'وصوله/NNP'), ('', 'الى/IN'), ('', 'أرض/NN'), ('', 'الوطن/DTNN'), ('', 'نشامى/VBP'), (…	['No Emotion Detected']	مسار قايد الطب ميدان عميد دكتور عصر هروط تم اخلاء مصاب عسكر خان يونس انتظار صول الى ارض وطن نشامى القو مسلح دايم وعد عهد مستمر تقديم عون مساعد الطب الى اشقاء قطاع غز يصنف مستشفى اردن خاص خان يونس مستشف درج ثالث تواجد اختصاص يوجد مستشف اردن عامل الضف غرب قطاع وغز ارد تلفز اردن جيش عرب القو مسلح		Health		Israeli-Palestinian Conflict		Real
يطلق قناة أغانينا الرقميّة الجديدة عبر شبكة الإنترنت بإمكانكم مشاهدة البث المباشر عبر تطبيق أو من خلال الرابط التالي أغانينا	Media	Entertainment	Real		Media	Entertainment	Real	يطلق قناة أغانينا الرقميّة الجديدة عبر شبكة الإنترنت بإمكانكم مشاهدة البث المباشر عبر تطبيق أو من خلال الرابط التالي أغانينا	[('', 'التلفزيون/DTNN'), ('', 'الأردني/DTJJ'), ('', 'يطلق/VBP'), ('', 'قناة/NN'), ('', 'أغانينا/NNP'), ('', 'الرقمية/DTJJ'), ('', 'الجديدة/DTJJ'), ('', 'عبر/NN'), ('', 'شبكة/NN'), ('', 'الإنترنت/DTNN'), ('', 'بإمكانكم/NNP'), ('', 'مشاهدة/NN'), ('', 'البث/DTNN'), ('', 'المباشر/DTJJ'), ('', 'عبر/NN'), ('', 'تطبيق/NN'), ('', 'التلفزيون/DTNN'), ('', 'الأردني/DTJJ'), ('', 'أو/VBD'), ('', 'من/IN'), (''…	['سعادة']	تلفز اردن يطلق قنا اغان رقم جديد عبر شبك انتر امك مشاهد البث مباشر عبر تطبيق تلفز اردن خلال رابط تال ارد تلفز اردن اغان		Media		Entertainment		Real
مسارات المستشفى الميداني في خانيونس يستهدف مجددا ضيوف الحلقة عضو مجلس الاعيان مصطفى الرواشدة والدكتور محمد القضاة عميد كلية الاداب في الجامعة الاردنية وسيكون معنا عبر الهاتف العميد د عصر الهروط قائد الطب الميداني في الخدمات الطبية الملكية مسارات غزة	Health	Israeli-Palestinian Conflict	Real		Health	Israeli-Palestinian Conflict	Real	مسارات المستشفى الميداني في خانيونس يستهدف مجددا ضيوف الحلقة عضو مجلس الاعيان مصطفى الرواشدة والدكتور محمد القضاة عميد كلية الاداب في الجامعة الاردنية وسيكون معنا عبر الهاتف العميد د عصر الهروط قائد الطب الميداني في الخدمات الطبية الملكية مسارات غزة	[('', 'مسارات/NNS'), ('', 'المستشفى/DTNN'), ('', 'الميداني/DTJJ'), ('', 'في/IN'), ('', 'خانيونس/NNP'), ('', 'يستهدف/VBP'), ('', 'مجددا/NN'), ('', 'ضيوف/NN'), ('', 'الحلقة/DTNN'), ('', 'عضو/NN'), ('', 'مجلس/NN'), ('', 'الاعيان/DTNN'), ('', 'مصطفى/NNP'), ('', 'الرواشدة/DTNN'), ('', 'والدكتور/NNP'), ('', 'محمد/NNP'), ('', 'القضاة/DTNN'), ('', 'عميد/NN'), ('', 'كلية/NN'), ('', 'الاداب/DTNN'), ('', 'ف…	['حزن']	مسار مستشفى ميدان خانيونس يستهدف مجدد ضيوف حلق عضو مجلس الاع مصطفى رواشد دكتور محمد قضا عميد كل اداب جامع اردن سيك معن عبر هاتف عميد عصر هروط قايد الطب ميدان خدم الطب ملك تلفز اردن مسار غز		Health		Israeli-Palestinian Conflict		Real
سلاح الجو الملكي تخريج الفوج الثاني والثالث من المجسرين في كلية سلاح الجو الملكي الاردن الجيش العربي القوات المسلحة	Military	Local	Real		Military	Local	Real	سلاح الجو الملكي تخريج الفوج الثاني والثالث من المجسرين في كلية سلاح الجو الملكي الاردن الجيش العربي القوات المسلحة	[('', 'سلاح/NN'), ('', 'الجو/DTNN'), ('', 'الملكي/DTJJ'), ('', 'تخريج/NN'), ('', 'الفوج/DTNN'), ('الثاني/ADJ', 'NUM'), ('', 'والثالث/NN'), ('', 'من/IN'), ('', 'المجسرين/DTNNS'), ('', 'في/IN'), ('', 'كلية/NN'), ('', 'سلاح/NN'), ('', 'الجو/DTNN'), ('', 'الملكي/DTJJ'), ('', 'الاردن/DTNNP'), ('', 'التلفزيون/DTNN'), ('', 'الأردني/DTJJ'), ('', 'الجيش/DTNN'), ('', 'العربي/DTJJ'), ('', 'القوات/DTNNS'), (…	['No Emotion Detected']	سلاح الجو ملك تخريج فوج ثان ثالث مجسر كل سلاح الجو ملك ارد تلفز اردن جيش عرب القو مسلح		Military		Local		Real
مجلس الأمة لجان في مجلس الأعيان تعقد عدداً من الاجتماعات الاردن	Government	Parliament	Real		Government	Parliament	Real	مجلس الأمة لجان في مجلس الأعيان تعقد عدداً من الاجتماعات الاردن	[('', 'مجلس/NN'), ('', 'الأمة/DTNN'), ('', 'لجان/NN'), ('', 'في/IN'), ('', 'مجلس/NN'), ('', 'الأعيان/DTNN'), ('', 'تعقد/VBN'), ('', 'عددا/NN'), ('', 'من/IN'), ('', 'الاجتماعات/DTNNS'), ('', 'الاردن/DTNNP'), ('', 'التلفزيون/DTNN'), ('', 'الأردني/DTJJ')]	['No Emotion Detected']	مجلس الام لجا مجلس الاع تعقد عدد اجتماع ارد تلفز اردن		Government		Parliament		Real
مجلس النواب مجلس النواب يقر مادة من مواد القانون المعدل لضمان الحصول على المعلومات الاردن	Government	Decisions	Real		Government	Decisions	Real	مجلس النواب مجلس النواب يقر مادة من مواد القانون المعدل لضمان الحصول على المعلومات الاردن	[('', 'مجلس/NN'), ('', 'النواب/DTNN'), ('', 'مجلس/NN'), ('', 'النواب/DTNN'), ('', 'يقر/VBP'), ('', 'مادة/NN'), ('', 'من/IN'), ('', 'مواد/NN'), ('', 'القانون/DTNN'), ('', 'المعدل/DTNN'), ('', 'لضمان/NN'), ('', 'الحصول/DTNN'), ('', 'على/IN'), ('', 'المعلومات/DTNNS'), ('', 'الاردن/DTNNP'), ('', 'التلفزيون/DTNN'), ('', 'الأردني/DTJJ')]	['No Emotion Detected']	مجلس نواب مجلس نواب يقر ماد مواد قان معدل لضما حصول معلوم ارد تلفز اردن		Government		Decisions		Real
الجيش العربي جلالة الملك يزور قيادة المنطقة العسكرية الشرقية الاردن الجيش العربي حرس الحدود	Military	Local	Real		Military	Local	Real	الجيش العربي جلالة الملك يزور قيادة المنطقة العسكرية الشرقية الاردن الجيش العربي حرس الحدود	[('', 'الجيش/DTNN'), ('', 'العربي/DTJJ'), ('', 'جلالة/NN'), ('', 'الملك/DTNN'), ('', 'يزور/VBP'), ('', 'قيادة/NN'), ('', 'المنطقة/DTNN'), ('', 'العسكرية/DTJJ'), ('', 'الشرقية/DTJJ'), ('', 'الاردن/DTNNP'), ('', 'التلفزيون/DTNN'), ('', 'الأردني/DTJJ'), ('', 'الجيش/DTNN'), ('', 'العربي/DTJJ'), ('', 'حرس/NN'), ('', 'الحدود/DTNN')]	['Conflicting Emotions Detected']	جيش عرب جلال ملك يزور قياد منطق عسكر شرق ارد تلفز اردن جيش عرب حرس حدود		Military		Local		Real
قوات حرس الحدود جلالة الملك يزور قيادة المنطقة العسكرية الشرقية الاردن الجيش العربي القوات المسلحة	Military	Local	Real		Military	Local	Real	قوات حرس الحدود جلالة الملك يزور قيادة المنطقة العسكرية الشرقية الاردن الجيش العربي القوات المسلحة	[('', 'قوات/NNS'), ('', 'حرس/NN'), ('', 'الحدود/DTNN'), ('', 'جلالة/NN'), ('', 'الملك/DTNN'), ('', 'يزور/VBP'), ('', 'قيادة/NN'), ('', 'المنطقة/DTNN'), ('', 'العسكرية/DTJJ'), ('', 'الشرقية/DTJJ'), ('', 'الاردن/DTNNP'), ('', 'التلفزيون/DTNN'), ('', 'الأردني/DTJJ'), ('', 'الجيش/DTNN'), ('', 'العربي/DTJJ'), ('', 'القوات/DTNNS'), ('', 'المسلحة/DTJJ')]	['Conflicting Emotions Detected']	قوا حرس حدود جلال ملك يزور قياد منطق عسكر شرق ارد تلفز اردن جيش عرب القو مسلح		Military		Local		Real
نشرة الأخبار الرئيسية الأربعاء	Media	News	Real		Media	News	Real	نشرة الأخبار الرئيسية الأربعاء	[('', 'نشرة/NN'), ('', 'الأخبار/DTNN'), ('', 'الرئيسية/DTJJ'), ('', 'الأربعاء/DTJJ'), ('', 'الاردن/DTNNP'), ('', 'التلفزيون/DTNN'), ('', 'الأردني/DTJJ')]	['حزن']	نشر اخبار رييس اربعاء ارد تلفز اردن		Media		News		Real
معان العمل متواصل للإرتقاء بقطاع الشباب والرياضة وفق الرؤى الملكية السامية	Politics	Youth Empowerment	Real		Politics	Youth Empowerment	Real	معان العمل متواصل للإرتقاء بقطاع الشباب والرياضة وفق الرؤى الملكية السامية	[('', 'معان/NNP'), ('', 'العمل/DTNN'), ('', 'متواصل/JJ'), ('', 'للإرتقاء/NN'), ('', 'بقطاع/NN'), ('', 'الشباب/DTNN'), ('', 'والرياضة/NN'), ('', 'وفق/NN'), ('', 'الرؤى/DTNN'), ('', 'الملكية/DTJJ'), ('', 'السامية/DTJJ')]	['No Emotion Detected']	معا عمل متواصل ارتقاء قطاع شباب رياض وفق روى ملك سام		Politics		Youth Empowerment		Real
المؤسستان المدنية والعسكرية مخزون كاف من المواد الاساسية بأسعارها الحالية لما بعد شهر رمضان	Economy	Financial Policies	Real		Economy	Financial Policies	Real	المؤسستان المدنية والعسكرية مخزون كاف من المواد الاساسية بأسعارها الحالية لما بعد شهر رمضان	[('', 'المؤسستان/DTNNS'), ('', 'المدنية/DTJJ'), ('', 'والعسكرية/JJ'), ('', 'مخزون/NN'), ('', 'كاف/JJ'), ('', 'من/IN'), ('', 'المواد/DTNN'), ('', 'الاساسية/DTJJ'), ('', 'بأسعارها/NN'), ('', 'الحالية/DTJJ'), ('', 'لما/IN'), ('', 'بعد/NN'), ('', 'شهر/NN'), ('', 'رمضان/NNP')]	['حزن']	موسست مدن عسكر مخزو مواد اساس اسعار حال شهر رمضا		Economy		Financial Policies		Real
إفتتاح مركز أمن باير كأقدم مركز أمني في المملكة	Military	Local	Real		Military	Local	Real	إفتتاح مركز أمن باير كأقدم مركز أمني في المملكة	[('', 'إفتتاح/VBD'), ('', 'مركز/NN'), ('', 'أمن/NN'), ('', 'باير/NNP'), ('', 'كأقدم/NNP'), ('', 'مركز/NN'), ('', 'أمني/JJ'), ('', 'في/IN'), ('', 'المملكة/DTNN')]	['حزن']	افتتاح مركز امن اير اقدم مركز امن مملك		Military		Local		Real
يطلق قناة الأرشيف الرقميّة الجديدة عبر شبكة الإنترنت بإمكانكم مشاهدة البث المباشر عبر تطبيق أو من خلال الرابط التالي أرشيف	Media	Entertainment	Real		Media	Entertainment	Real	يطلق قناة الأرشيف الرقميّة الجديدة عبر شبكة الإنترنت بإمكانكم مشاهدة البث المباشر عبر تطبيق أو من خلال الرابط التالي أرشيف	[('', 'التلفزيون/DTNN'), ('', 'الأردني/DTJJ'), ('', 'يطلق/VBP'), ('', 'قناة/NN'), ('', 'الأرشيف/DTNN'), ('', 'الرقمية/DTJJ'), ('', 'الجديدة/DTJJ'), ('', 'عبر/NN'), ('', 'شبكة/NN'), ('', 'الإنترنت/DTNN'), ('', 'بإمكانكم/NNP'), ('', 'مشاهدة/NN'), ('', 'البث/DTNN'), ('', 'المباشر/DTJJ'), ('', 'عبر/NN'), ('', 'تطبيق/NN'), ('', 'التلفزيون/DTNN'), ('', 'الأردني/DTJJ'), ('', 'أو/VBD'), ('', 'من/IN'), ('…	['سعادة']	تلفز اردن يطلق قنا ارشيف رقم جديد عبر شبك انتر امك مشاهد البث مباشر عبر تطبيق تلفز اردن خلال رابط تال ارد تلفز اردن ارشيف		Media		Entertainment		Real
المعايطة إنخفاض الحوادث المرورية والمخالفات الخطرة منذ إنفاذ القانون الجديد	Law	Local	Real		Law	Local	Real	المعايطة إنخفاض الحوادث المرورية والمخالفات الخطرة منذ إنفاذ القانون الجديد	[('', 'المعايطة/DTNN'), ('', 'إنخفاض/NN'), ('', 'الحوادث/DTNN'), ('', 'المرورية/DTJJ'), ('', 'والمخالفات/NNS'), ('', 'الخطرة/DTJJ'), ('', 'منذ/IN'), ('', 'إنفاذ/NN'), ('', 'القانون/DTNN'), ('', 'الجديد/DTJJ')]	['سعادة']	معايط انخفاض حوادث مرور مخالف خطر انفاذ قان جديد		Law		Local		Real
في الميدان لواء المزار الشمالي الأربعاء	Society	Local	Real		Society	Local	Real	في الميدان لواء المزار الشمالي الأربعاء	[('', 'في/IN'), ('', 'الميدان/DTNN'), ('', 'لواء/NN'), ('', 'المزار/DTNNP'), ('', 'الشمالي/DTJJ'), ('', 'الأربعاء/DTJJ'), ('', 'الاردن/DTNNP'), ('', 'التلفزيون/DTNN'), ('', 'الأردني/DTJJ')]	['No Emotion Detected']	ميد لواء مزار شمال اربعاء ارد تلفز اردن		Society		Local		Real
المالية النيابية تناقش موازنات وزارة الاتصال الحكومي ومؤسسات الاعلام الرسمية	Government	Parliament	Real		Government	Parliament	Real	المالية النيابية تناقش موازنات وزارة الاتصال الحكومي ومؤسسات الاعلام الرسمية	[('', 'المالية/DTNN'), ('', 'النيابية/DTJJ'), ('', 'تناقش/VBN'), ('', 'موازنات/NNS'), ('', 'وزارة/NN'), ('', 'الاتصال/DTNN'), ('', 'الحكومي/DTJJ'), ('', 'ومؤسسات/NNS'), ('', 'الاعلام/DTNN'), ('', 'الرسمية/DTJJ')]	['No Emotion Detected']	مال نياب تناقش موازن زار اتصال حكوم موسس اعلام رسم		Government		Parliament		Real
أهالي قضاء رحاب يطالبون بتحسين الخدمات وتنفيذ المشاريع التنموية	Environment	Infrastructure	Real		Environment	Infrastructure	Real	أهالي قضاء رحاب يطالبون بتحسين الخدمات وتنفيذ المشاريع التنموية	[('', 'أهالي/NN'), ('', 'قضاء/NN'), ('', 'رحاب/NN'), ('', 'يطالبون/VBP'), ('', 'بتحسين/NN'), ('', 'الخدمات/DTNNS'), ('', 'وتنفيذ/NN'), ('', 'المشاريع/DTNN'), ('', 'التنموية/DTJJ')]	['Conflicting Emotions Detected']	اهال قضاء رحاب يطالب تحس خدم تنفيذ مشاريع تنمو		Environment		Infrastructure		Real
إفتتاح البرنامج التدريبي الاول في المملكة لفريق متعدد التخصصات	Education	Training	Real		Society	Local	Real	إفتتاح البرنامج التدريبي الاول في المملكة لفريق متعدد التخصصات	[('', 'إفتتاح/VBD'), ('', 'البرنامج/DTNN'), ('', 'التدريبي/DTJJ'), ('الاول/ADJ', 'NUM'), ('', 'في/IN'), ('', 'المملكة/DTNN'), ('', 'لفريق/NN'), ('', 'متعدد/JJ'), ('', 'التخصصات/DTNNS')]	['حزن']	افتتاح برنامج تدريب اول مملك فريق متعدد تخصص		Education		Training		Real
القيادة العامة إصابة أحد مرتبات المستشفى الميداني الاردني الخاص خانيونس عودة شديفات خبير عسكري	Health	Israeli-Palestinian Conflict	Real		Health	Israeli-Palestinian Conflict	Real	القيادة العامة إصابة أحد مرتبات المستشفى الميداني الاردني الخاص خانيونس عودة شديفات خبير عسكري	[('', 'القيادة/DTNN'), ('', 'العامة/DTJJ'), ('', 'إصابة/NN'), ('', 'أحد/NN'), ('', 'مرتبات/NNS'), ('', 'المستشفى/DTNN'), ('', 'الميداني/DTJJ'), ('', 'الاردني/DTJJ'), ('', 'الخاص/DTJJ'), ('', 'خانيونس/NNP'), ('', 'عودة/NN'), ('', 'شديفات/NNS'), ('', 'خبير/NN'), ('', 'عسكري/JJ')]	['حزن']	قياد عام اصاب مرتب مستشفى ميدان اردن خاص خانيونس عود شديف خبير عسكر		Health		Israeli-Palestinian Conflict		Real
مهيدات رؤية ملكية سباقة في مجال الأمن الغذائي وجعل الأردن مركزا إقليميا للغذاء	Government	Food	Real		Government	Food	Real	مهيدات رؤية ملكية سباقة في مجال الأمن الغذائي وجعل الأردن مركزا إقليميا للغذاء	[('', 'مهيدات/NNS'), ('', 'رؤية/NN'), ('', 'ملكية/NN'), ('', 'سباقة/JJ'), ('', 'في/IN'), ('', 'مجال/NN'), ('', 'الأمن/DTNN'), ('', 'الغذائي/DTJJ'), ('', 'وجعل/NN'), ('', 'الأردن/DTNN'), ('', 'مركزا/NN'), ('', 'إقليميا/JJ'), ('', 'للغذاء/JJ')]	['No Emotion Detected']	مهيد رء ملك سباق مجال امن غذاء جعل ارد مركز اقليم غذاء		Government		Food		Real
القيادة العامة إصابة أحد مرتبات المستشفى الميداني الاردني الخاص خانيونس عبدالله الحسنات خبير عسكري	Health	Israeli-Palestinian Conflict	Real		Health	Israeli-Palestinian Conflict	Real	القيادة العامة إصابة أحد مرتبات المستشفى الميداني الاردني الخاص خانيونس عبدالله الحسنات خبير عسكري	[('', 'القيادة/DTNN'), ('', 'العامة/DTJJ'), ('', 'إصابة/NN'), ('', 'أحد/NN'), ('', 'مرتبات/NNS'), ('', 'المستشفى/DTNN'), ('', 'الميداني/DTJJ'), ('', 'الاردني/DTJJ'), ('', 'الخاص/DTJJ'), ('', 'خانيونس/NNP'), ('', 'عبدالله/NNP'), ('', 'الحسنات/DTNNS'), ('', 'خبير/NN'), ('', 'عسكري/JJ')]	['حزن']	قياد عام اصاب مرتب مستشفى ميدان اردن خاص خانيونس عبدالل حسن خبير عسكر		Health		Israeli-Palestinian Conflict		Real
الحرب على غزة في يومها الـ ودبابات الاحتلال تظهر مجددا شمالي القطاع	Politics	Israeli-Palestinian Conflict	Real		Politics	Israeli-Palestinian Conflict	Real	الحرب على غزة في يومها الـ ودبابات الاحتلال تظهر مجددا شمالي القطاع	[('', 'الحرب/DTNN'), ('', 'على/IN'), ('', 'غزة/NNP'), ('', 'في/IN'), ('', 'يومها/NN'), ('', 'الـ/DTNN'), ('', 'ودبابات/NNS'), ('', 'الاحتلال/DTNN'), ('', 'تظهر/VBP'), ('', 'مجددا/NN'), ('', 'شمالي/JJ'), ('', 'القطاع/DTNN')]	['حب']	حرب غز يوم ال دباب احتلال تظهر مجدد شمال قطاع		Politics		Israeli-Palestinian Conflict		Real
المستشفيات الاردنية في الضفة الغربية وقطاع غزة تواصل تقديم خدماتها الطبية رغم خطورة الاوضاع	Health	Israeli-Palestinian Conflict	Real		Health	Israeli-Palestinian Conflict	Real	المستشفيات الاردنية في الضفة الغربية وقطاع غزة تواصل تقديم خدماتها الطبية رغم خطورة الاوضاع	[('', 'المستشفيات/DTNNS'), ('', 'الاردنية/DTJJ'), ('', 'في/IN'), ('', 'الضفة/DTNNP'), ('', 'الغربية/DTJJ'), ('', 'وقطاع/NN'), ('', 'غزة/NNP'), ('', 'تواصل/VBP'), ('', 'تقديم/NN'), ('', 'خدماتها/NN'), ('', 'الطبية/DTJJ'), ('', 'رغم/NN'), ('', 'خطورة/NN'), ('', 'الاوضاع/DTNN')]	['No Emotion Detected']	مستشف اردن الضف غرب قطاع غز تواصل تقديم خدما الطب رغم خطور اوضاع		Health		Israeli-Palestinian Conflict		Real
برنامج بين السطور قراءة وتحليل لأبرز ماتداوله الكتّاب في الصحف المحليّة والعربيّة والعالميّة الاردن	Media	Analysis	Real		Media	Analysis	Real	برنامج بين السطور قراءة وتحليل لأبرز ماتداوله الكتّاب في الصحف المحليّة والعربيّة والعالميّة الاردن	[('', 'برنامج/NN'), ('', 'بين/NN'), ('', 'السطور/DTNN'), ('', 'قراءة/NN'), ('', 'وتحليل/NN'), ('', 'لأبرز/NNP'), ('', 'ماتداوله/NNP'), ('', 'الكتاب/DTNN'), ('', 'في/IN'), ('', 'الصحف/DTNN'), ('', 'المحلية/DTJJ'), ('', 'والعربية/NN'), ('', 'والعالمية/JJ'), ('', 'الاردن/DTNNP'), ('', 'التلفزيون/DTNN'), ('', 'الأردني/DTJJ')]	['No Emotion Detected']	رنامج سطور قراء تحليل ابرز ماتداول كتاب صحف محل عرب عالم ارد تلفز اردن		Media		Analysis		Real
يطلق قناة الكوميديا الرقميّة الجديدة عبر شبكة الإنترنت بإمكانكم مشاهدة البث المباشر عبر تطبيق أو من خلال الرابط التالي الكوميديا الكوميديا الأردنية	Media	Entertainment	Real		Media	Entertainment	Real	يطلق قناة الكوميديا الرقميّة الجديدة عبر شبكة الإنترنت بإمكانكم مشاهدة البث المباشر عبر تطبيق أو من خلال الرابط التالي الكوميديا الكوميديا الأردنية	[('', 'التلفزيون/DTNN'), ('', 'الأردني/DTJJ'), ('', 'يطلق/VBP'), ('', 'قناة/NN'), ('', 'الكوميديا/DTNNP'), ('', 'الرقمية/DTJJ'), ('', 'الجديدة/DTJJ'), ('', 'عبر/NN'), ('', 'شبكة/NN'), ('', 'الإنترنت/DTNN'), ('', 'بإمكانكم/NNP'), ('', 'مشاهدة/NN'), ('', 'البث/DTNN'), ('', 'المباشر/DTJJ'), ('', 'عبر/NN'), ('', 'تطبيق/NN'), ('', 'التلفزيون/DTNN'), ('', 'الأردني/DTJJ'), ('', 'أو/VBD'), ('', 'من/IN'),…	['سعادة']	تلفز اردن يطلق قنا كوميد رقم جديد عبر شبك انتر امك مشاهد البث مباشر عبر تطبيق تلفز اردن خلال رابط تال ارد تلفز اردن كوميد كوميد اردن		Media		Entertainment		Real
شهداء بقصف مسيرات اسرائيلية لمركبات في نابلس وطولكرم ربط مباشر مع نوال حجازي مراسلة في القدس المحتلة	Politics	Israeli-Palestinian Conflict	Real		Politics	Israeli-Palestinian Conflict	Real	شهداء بقصف مسيرات اسرائيلية لمركبات في نابلس وطولكرم ربط مباشر مع نوال حجازي مراسلة في القدس المحتلة	[('', 'شهداء/NN'), ('', 'بقصف/NN'), ('', 'مسيرات/NNS'), ('', 'اسرائيلية/JJ'), ('', 'لمركبات/NNS'), ('', 'في/IN'), ('', 'نابلس/NNP'), ('', 'وطولكرم/NNP'), ('', 'ربط/NN'), ('', 'مباشر/JJ'), ('', 'مع/NN'), ('', 'نوال/NNP'), ('', 'حجازي/NNP'), ('', 'مراسلة/NN'), ('', 'التلفزيون/DTNN'), ('', 'الأردني/DTJJ'), ('', 'في/IN'), ('', 'القدس/DTNNP'), ('', 'المحتلة/DTJJ')]	['حزن']	شهداء قصف مسير اسراييل مركب نابلس طولكرم ربط مباشر نوال حجاز مراسل تلفز اردن قدس محتل		Politics		Israeli-Palestinian Conflict		Real
عاجل الملك يؤكد خلال زيارته المنطقة العسكرية الشرقية ثقته بدور قوات حرس الحدود في الدفاع عن الوطن حيّا جلالة الملك عبدالله الثاني القائد الأعلى للقوات المسلحة جميع مرتبات المنطقة العسكرية الشرقية على اختلاف مواقعها وصنوفها وأكد جلالة القائد الأعلى عبر أثير الجهاز اللاسلكي خلال زيارته اليوم الأربعاء قيادة المنطقة العسكرية الشرقية ثقته وكل الأردنيين بدور قوات حرس الحدود في الدفاع عن حدود الوطن والذ…	Military	National Security	Real		Military	National Security	Real	عاجل الملك يؤكد خلال زيارته المنطقة العسكرية الشرقية ثقته بدور قوات حرس الحدود في الدفاع عن الوطن حيّا جلالة الملك عبدالله الثاني القائد الأعلى للقوات المسلحة جميع مرتبات المنطقة العسكرية الشرقية على اختلاف مواقعها وصنوفها وأكد جلالة القائد الأعلى عبر أثير الجهاز اللاسلكي خلال زيارته اليوم الأربعاء قيادة المنطقة العسكرية الشرقية ثقته وكل الأردنيين بدور قوات حرس الحدود في الدفاع عن حدود الوطن والذ…	[('', 'عاجل/JJ'), ('', 'الملك/DTNN'), ('', 'يؤكد/VBP'), ('', 'خلال/NN'), ('', 'زيارته/NN'), ('', 'المنطقة/DTNN'), ('', 'العسكرية/DTJJ'), ('', 'الشرقية/DTJJ'), ('', 'ثقته/NN'), ('', 'بدور/NN'), ('', 'قوات/NNS'), ('', 'حرس/NN'), ('', 'الحدود/DTNN'), ('', 'في/IN'), ('', 'الدفاع/DTNN'), ('', 'عن/IN'), ('', 'الوطن/DTNN'), ('', 'حيا/JJ'), ('', 'جلالة/NN'), ('', 'الملك/DTNN'), ('', 'عبدالله/NNP'), ('الث…	['Conflicting Emotions Detected']	عاجل ملك يوكد خلال زيار منطق عسكر شرق ثقت دور قوا حرس حدود دفاع وطن حيا جلال ملك عبدالل ثان قايد اعلى للقو مسلح مرتب منطق عسكر شرق اختلاف مواقع صنوف اكد جلال قايد اعلى عبر اثير جهاز لاسلك خلال زيار يوم اربعاء قياد منطق عسكر شرق ثقت وكل اردن دور قوا حرس حدود دفاع حدود وطن ذود حما اعرب جلال تقدير عال لتضح نشامى جيش عرب حفاظ امن وطن واستقرار فخر نشامى مرتب منطق عسكر شرق واعتزاز كبير جهود تضح خاص تصد…		Military		National Security		Real
مدير يزور إدارة السير ويثمّن جهودها المبذولة للحفاظ على بيئة مرورية في شتى الظروف نلمس انخفاضاً في الحوادث المرورية والمخالفات الخطرة منذ إنفاذ القانون الجديد نسعى لتعزيز منظومات الرقابة الإلكترونية بالتعاون مع الشركاء أكّد مدير اللواء الدكتور عبيد الله المعايطة على ضرورة المضي قدماً في تنفيذ الإستراتيجية المرورية الهادفة إلى تعزيز بيئة مرورية آمنة وتقييم خططها وإجراءاتها ووضع الحلول اللازمة للتخ…	Traffic	Local	Real		Traffic	Local	Real	مدير يزور إدارة السير ويثمّن جهودها المبذولة للحفاظ على بيئة مرورية في شتى الظروف نلمس انخفاضاً في الحوادث المرورية والمخالفات الخطرة منذ إنفاذ القانون الجديد نسعى لتعزيز منظومات الرقابة الإلكترونية بالتعاون مع الشركاء أكّد مدير اللواء الدكتور عبيد الله المعايطة على ضرورة المضي قدماً في تنفيذ الإستراتيجية المرورية الهادفة إلى تعزيز بيئة مرورية آمنة وتقييم خططها وإجراءاتها ووضع الحلول اللازمة للتخ…	[('', 'مدير/NN'), ('', 'الأمن/DTNN'), ('', 'العام/DTJJ'), ('', 'يزور/VBP'), ('', 'إدارة/NN'), ('', 'السير/DTNN'), ('', 'ويثمن/NNP'), ('', 'جهودها/NNP'), ('', 'المبذولة/DTJJ'), ('', 'للحفاظ/DTJJ'), ('', 'على/IN'), ('', 'بيئة/NN'), ('', 'مرورية/JJ'), ('', 'في/IN'), ('', 'شتى/JJ'), ('', 'الظروف/DTNN'), ('', 'نلمس/VBP'), ('', 'انخفاضا/NN'), ('', 'في/IN'), ('', 'الحوادث/DTNN'), ('', 'المرورية/DTJJ'), …	['Conflicting Emotions Detected']	مدير امن عام يزور ادار سير يثم جهود مبذول حفاظ بيء مرور شتى ظروف نلمس انخفاض حوادث مرور مخالف خطر انفاذ قان جديد نسعى تعزيز منظوم رقاب الكترون تعا شركاء اكد مدير امن عام لواء دكتور عبيد الله معايط ضرور المض قدم تنفيذ استراتيج مرور هادف تعزيز بيء مرور امن تقييم خطط اجراء وضع حلول لازم تخفيف ازدحام مختلف مناطق مملك نقل لواء معايط خلال زيار يوم ادار سير تقدير جلال ملك عبدالل ثان قايد اعلى للقو مسلح …		Traffic		Local		Real
الأردن يبذل جهودا سياسية كبيرة لوقف الحرب غزة وحماية المدنيين الدكتور وليد العويمر أستاذ العلوم السياسية في جامعة مؤته الأردن غزة	Politics	Israeli-Palestinian Conflict	Real		Politics	Israeli-Palestinian Conflict	Real	الأردن يبذل جهودا سياسية كبيرة لوقف الحرب غزة وحماية المدنيين الدكتور وليد العويمر أستاذ العلوم السياسية في جامعة مؤته الأردن غزة	[('', 'الأردن/DTNN'), ('', 'يبذل/VBP'), ('', 'جهودا/NN'), ('', 'سياسية/JJ'), ('', 'كبيرة/JJ'), ('', 'لوقف/NN'), ('', 'الحرب/DTNN'), ('', 'غزة/NNP'), ('', 'وحماية/NN'), ('', 'المدنيين/DTNNS'), ('', 'الدكتور/DTNN'), ('', 'وليد/NNP'), ('', 'العويمر/DTNNP'), ('', 'أستاذ/NN'), ('', 'العلوم/DTNN'), ('', 'السياسية/DTJJ'), ('', 'في/IN'), ('', 'جامعة/NN'), ('', 'مؤته/NN'), ('', 'الأردن/DTNN'), ('', 'التلف…	['حزن']	ارد يبذل جهود سياس كبير لوقف حرب غز حما مدن دكتور ليد عويمر استاذ علوم سياس جامع موت ارد تلفز اردن غز		Politics		Israeli-Palestinian Conflict		Real
وزارة الاتصال الحكومي تنشر الموجز الأول لإنجازات الوزارات والمؤسسات الحكومية عن شهر كانون الأول لعام	Government	Announcements	Real		Government	Announcements	Real	وزارة الاتصال الحكومي تنشر الموجز الأول لإنجازات الوزارات والمؤسسات الحكومية عن شهر كانون الأول لعام	[('', 'وزارة/NN'), ('', 'الاتصال/DTNN'), ('', 'الحكومي/DTJJ'), ('', 'تنشر/VBP'), ('', 'الموجز/DTJJ'), ('', 'الأول/DTNN'), ('', 'لإنجازات/NNS'), ('', 'الوزارات/DTNNS'), ('', 'والمؤسسات/NNP'), ('', 'الحكومية/DTJJ'), ('', 'عن/IN'), ('', 'شهر/NN'), ('', 'كانون/NNP'), ('', 'الأول/DTNN'), ('', 'لعام/NN'), ('', 'الأردن/DTNN'), ('', 'التلفزيون/DTNN'), ('', 'الأردني/DTJJ')]	['اشمئزاز']	زار اتصال حكوم تنشر موجز اول انجاز وزار موسس حكوم شهر اول لعام ارد تلفز اردن		Government		Announcements		Real
ارتفاع عدد ضحايا العدوان الإسرائيلي على غزة إلى شهيدا و مصابين منذ بداية الحـ ـرب طوفان الأقصى غزة الأردن	Politics	Israeli-Palestinian Conflict	Real		Politics	Israeli-Palestinian Conflict	Real	ارتفاع عدد ضحايا العدوان الإسرائيلي على غزة إلى شهيدا و مصابين منذ بداية الحـ ـرب طوفان الأقصى غزة الأردن	[('', 'ارتفاع/NN'), ('', 'عدد/NN'), ('', 'ضحايا/NN'), ('', 'العدوان/DTNN'), ('', 'الإسرائيلي/DTJJ'), ('', 'على/IN'), ('', 'غزة/NNP'), ('', 'إلى/NNP'), ('', 'شهيدا/JJ'), ('', 'و/CC'), ('', 'مصابين/JJ'), ('', 'منذ/IN'), ('', 'بداية/NN'), ('', 'الحـ/DTNN'), ('', 'ـرب/NN'), ('', 'طوفان/NN'), ('', 'الأقصى/DTNN'), ('', 'غزة/NNP'), ('', 'الأردن/DTNNP'), ('', 'التلفزيون/DTNN'), ('', 'الأردني/DTJJ')]	['اشمئزاز']	ارتفاع عدد ضحا عدو اسراييل غز شهيد مصاب بدا الح رب طوفا اقصى غز ارد تلفز اردن		Politics		Israeli-Palestinian Conflict		Real
عاجل وزارة الصحة الفلسطينية حصيلة الشهداء برصاص الاحتلال والمستوطنين بالضفة والقدس المحتلة منذ أكتوبر الأردن	Politics	Israeli-Palestinian Conflict	Real		Politics	Israeli-Palestinian Conflict	Real	عاجل وزارة الصحة الفلسطينية حصيلة الشهداء برصاص الاحتلال والمستوطنين بالضفة والقدس المحتلة منذ أكتوبر الأردن	[('', 'عاجل/JJ'), ('', 'وزارة/NN'), ('', 'الصحة/DTNN'), ('', 'الفلسطينية/DTJJ'), ('', 'حصيلة/NN'), ('', 'الشهداء/DTNN'), ('', 'برصاص/NN'), ('', 'الاحتلال/DTNN'), ('', 'والمستوطنين/NNP'), ('', 'بالضفة/NNP'), ('', 'والقدس/NNP'), ('', 'المحتلة/DTJJ'), ('', 'منذ/IN'), ('', 'أكتوبر/NN'), ('', 'الأردن/DTNN'), ('', 'التلفزيون/DTNN'), ('', 'الأردني/DTJJ')]	['حزن']	عاجل زار الصح فلسطين حصيل شهداء رصاص احتلال مستوطن الضف قدس محتل ارد تلفز اردن		Politics		Israeli-Palestinian Conflict		Real
غوتيريش ما يحدث في البحر الأحمر يظهر أهمية وقف إطلاق النار في غزة وإطلاق سراح الرهائن الأردن غزة	Politics	Israeli-Palestinian Conflict	Real		Politics	Israeli-Palestinian Conflict	Real	غوتيريش ما يحدث في البحر الأحمر يظهر أهمية وقف إطلاق النار في غزة وإطلاق سراح الرهائن الأردن غزة	[('', 'غوتيريش/NNP'), ('', 'ما/WP'), ('', 'يحدث/VBP'), ('', 'في/IN'), ('', 'البحر/DTNN'), ('', 'الأحمر/DTNN'), ('', 'يظهر/VBP'), ('', 'أهمية/NN'), ('', 'وقف/NN'), ('', 'إطلاق/NN'), ('', 'النار/DTNN'), ('', 'في/IN'), ('', 'غزة/NNP'), ('', 'وإطلاق/NN'), ('', 'سراح/NN'), ('', 'الرهائن/DTNN'), ('', 'الأردن/DTJJ'), ('', 'التلفزيون/DTNN'), ('', 'الأردني/DTJJ'), ('', 'غزة/NNP')]	['حزن']	غوتيريش يحدث بحر احمر يظهر اهم وقف اطلاق نار غز اطلاق سراح رهاء ارد تلفز اردن غز		Politics		Israeli-Palestinian Conflict		Real
القوات المسلحة الأردنية إصابة أحد مرتبات المستشفى الميداني الأردني الخاص في خان يونس جنوب قطاع غزة صرح مصدر عسكري مسؤول في القيادة العامة للقوات المسلحة الأردنية ــ الجيش العربي أن أحد مرتبات المستشفى الميداني الأردني الخاص في خان يونس جنوب قطاع غزة تعرض للإصابة خلال الساعات الماضية نتيجة للاشتباكات في محيط المستشفى وأشار المصدر إلى أن حالة المصاب الذي جُرح بمنطقة الفخذ الأيمن واليد اليمنى متوسطة…	Health	Israeli-Palestinian Conflict	Real		Health	Israeli-Palestinian Conflict	Real	القوات المسلحة الأردنية إصابة أحد مرتبات المستشفى الميداني الأردني الخاص في خان يونس جنوب قطاع غزة صرح مصدر عسكري مسؤول في القيادة العامة للقوات المسلحة الأردنية ــ الجيش العربي أن أحد مرتبات المستشفى الميداني الأردني الخاص في خان يونس جنوب قطاع غزة تعرض للإصابة خلال الساعات الماضية نتيجة للاشتباكات في محيط المستشفى وأشار المصدر إلى أن حالة المصاب الذي جُرح بمنطقة الفخذ الأيمن واليد اليمنى متوسطة…	[('', 'القوات/DTNNS'), ('', 'المسلحة/DTJJ'), ('', 'الأردنية/DTJJ'), ('', 'إصابة/NN'), ('', 'أحد/NN'), ('', 'مرتبات/NNS'), ('', 'المستشفى/DTNN'), ('', 'الميداني/DTJJ'), ('', 'الأردني/DTJJ'), ('', 'الخاص/DTJJ'), ('', 'في/IN'), ('', 'خان/NNP'), ('', 'يونس/NNP'), ('', 'جنوب/NN'), ('', 'قطاع/NN'), ('', 'غزة/NNP'), ('', 'صرح/VBD'), ('', 'مصدر/NN'), ('', 'عسكري/JJ'), ('', 'مسؤول/JJ'), ('', 'في/IN'), (''…	['Conflicting Emotions Detected']	القو مسلح اردن اصاب مرتب مستشفى ميدان اردن خاص خان يونس جنوب قطاع غز صرح مصدر عسكر مسوول قياد عام للقو مسلح اردن جيش عرب مرتب مستشفى ميدان اردن خاص خان يونس جنوب قطاع غز تعرض اصاب خلال ساع ماض نتيج اشتباك محيط مستشفى اشار مصدر حال مصاب جرح منطق فخذ ايم واليد يمنى متوسط سيجلى جوا مملك لتلق علاج لازم توجيه ملك سام وب مصدر مواط غز يتلقى علاج وحد عنا مركز اصيب بشظ عيار نار خلال عدو اشار مصدر مستشفى ت…		Health		Israeli-Palestinian Conflict		Real
مفهوم التربية الوالدية د زياد الخزاعلة إرشاد نفسي من الجامعة الهاشمية يوم جديد	Media	TV Show	Real		Media	TV Show	Real	مفهوم التربية الوالدية د زياد الخزاعلة إرشاد نفسي من الجامعة الهاشمية يوم جديد	[('', 'مفهوم/NN'), ('', 'التربية/DTNN'), ('', 'الوالدية/DTJJ'), ('', 'د/NN'), ('', 'زياد/NNP'), ('', 'الخزاعلة/DTNN'), ('', 'إرشاد/NN'), ('', 'نفسي/NN'), ('', 'من/IN'), ('', 'الجامعة/DTNN'), ('', 'الهاشمية/DTJJ'), ('', 'يوم/NN'), ('', 'جديد/JJ'), ('', 'التلفزيون/DTNN'), ('', 'الأردني/DTJJ')]	['حزن']	مفهوم ترب والد زياد خزاعل ارشاد نفس جامع هاشم يوم جديد تلفز اردن		Media		TV Show		Real
وزارة الصحة في غزة انتشار التهاب الكبد الوبائي نتيجة الاكتظاظ في أماكن النزوح بالقطاع طوفان الأقصى غزة الأردن	Health	Crisis	Real		Health	Crisis	Real	وزارة الصحة في غزة انتشار التهاب الكبد الوبائي نتيجة الاكتظاظ في أماكن النزوح بالقطاع طوفان الأقصى غزة الأردن	[('', 'وزارة/NN'), ('', 'الصحة/DTNN'), ('', 'في/IN'), ('', 'غزة/NNP'), ('', 'انتشار/NN'), ('', 'التهاب/NN'), ('', 'الكبد/DTNN'), ('', 'الوبائي/DTJJ'), ('', 'نتيجة/NN'), ('', 'الاكتظاظ/DTNN'), ('', 'في/IN'), ('', 'أماكن/NN'), ('', 'النزوح/DTNN'), ('', 'بالقطاع/NN'), ('', 'طوفان/NN'), ('', 'الأقصى/DTNN'), ('', 'غزة/NNP'), ('', 'الأردن/DTNNP'), ('', 'التلفزيون/DTNN'), ('', 'الأردني/DTJJ')]	['No Emotion Detected']	زار الصح غز انتشار تهاب كبد وباء نتيج اكتظاظ اما نزوح قطاع طوفا اقصى غز ارد تلفز اردن		Health		Crisis		Real
تقرير عن متحف الأردن وهو احد المعالم الوطنية والسياحية في عمان د احمد المومني مدير الاتصال وتطوير الاعمال تقرير للزميل رعد الرقاد يوم جديد	Tourism	Local	Real		Tourism	Local	Real	تقرير عن متحف الأردن وهو احد المعالم الوطنية والسياحية في عمان د احمد المومني مدير الاتصال وتطوير الاعمال تقرير للزميل رعد الرقاد يوم جديد	[('', 'تقرير/NN'), ('', 'عن/IN'), ('', 'متحف/NN'), ('', 'الأردن/DTNN'), ('', 'وهو/VBD'), ('', 'احد/NN'), ('', 'المعالم/DTNN'), ('', 'الوطنية/DTJJ'), ('', 'والسياحية/JJ'), ('', 'في/IN'), ('', 'عمان/NNP'), ('', 'د/NN'), ('', 'احمد/NNP'), ('', 'المومني/DTNNP'), ('', 'مدير/NN'), ('', 'الاتصال/DTNN'), ('', 'وتطوير/NN'), ('', 'الاعمال/DTNN'), ('', 'تقرير/NN'), ('', 'للزميل/NNP'), ('', 'رعد/NNP'), ('', …	['Conflicting Emotions Detected']	تقرير متحف ارد احد معالم وطن سياح عما احمد مومن مدير اتصال تطوير اعمال تقرير زميل رعد رقاد تلفز اردن يوم جديد		Tourism		Local		Real
الاحتلال ارتكب مجزرة بحق عائلات في القطاع راح ضحيتها شهيدا و مصابا خلال ساعة الأردن غزة	Humanitarian	Israeli-Palestinian Conflict	Real		Politics	Israeli-Palestinian Conflict	Real	الاحتلال ارتكب مجزرة بحق عائلات في القطاع راح ضحيتها شهيدا و مصابا خلال ساعة الأردن غزة	[('', 'الاحتلال/DTNN'), ('', 'ارتكب/VBD'), ('', 'مجزرة/NN'), ('', 'بحق/NN'), ('', 'عائلات/NNS'), ('', 'في/IN'), ('', 'القطاع/DTNN'), ('', 'راح/NN'), ('', 'ضحيتها/NN'), ('', 'شهيدا/JJ'), ('', 'و/CC'), ('', 'مصابا/NN'), ('', 'خلال/NN'), ('', 'ساعة/NN'), ('', 'الأردن/DTNN'), ('', 'التلفزيون/DTNN'), ('', 'الأردني/DTJJ'), ('', 'غزة/NNP')]	['No Emotion Detected']	احتلال ارتكب مجزر بحق عايل قطاع ضح شهيد مصاب خلال ساع ارد تلفز اردن غز		Humanitarian		Israeli-Palestinian Conflict		Real
مباشر مجلس النواب يستكمل مناقشة معدل قانون ضمان حق الحصول على المعلومات الأردن	Government	Parliament	Real		Government	Parliament	Real	مباشر مجلس النواب يستكمل مناقشة معدل قانون ضمان حق الحصول على المعلومات الأردن	[('', 'مباشر/NN'), ('', 'مجلس/NN'), ('', 'النواب/DTNN'), ('', 'يستكمل/VBN'), ('', 'مناقشة/NN'), ('', 'معدل/NN'), ('', 'قانون/NN'), ('', 'ضمان/NN'), ('', 'حق/NN'), ('', 'الحصول/DTNN'), ('', 'على/IN'), ('', 'المعلومات/DTNNS'), ('', 'الأردن/DTJJ'), ('', 'التلفزيون/DTNN'), ('', 'الأردني/DTJJ')]	['اشمئزاز']	مباشر مجلس نواب يستكمل مناقش معدل قانو ضما حق حصول معلوم ارد تلفز اردن		Government		Parliament		Real
قصف من الطائرات والمدفعية الإسرائيلية على أنصار والميناء غرب مدينة غزة الأردن غزة	Politics	Israeli-Palestinian Conflict	Real		Politics	Israeli-Palestinian Conflict	Real	قصف من الطائرات والمدفعية الإسرائيلية على أنصار والميناء غرب مدينة غزة الأردن غزة	[('', 'قصف/NN'), ('', 'من/IN'), ('', 'الطائرات/DTNNS'), ('', 'والمدفعية/NN'), ('', 'الإسرائيلية/DTNN'), ('', 'على/IN'), ('', 'أنصار/NN'), ('', 'والميناء/NN'), ('', 'غرب/NN'), ('', 'مدينة/NN'), ('', 'غزة/NNP'), ('', 'الأردن/DTJJ'), ('', 'التلفزيون/DTNN'), ('', 'الأردني/DTJJ'), ('', 'غزة/NNP')]	['No Emotion Detected']	قصف طاير مدفع اسراييل انصار ميناء غرب مدين غز ارد تلفز اردن غز		Politics		Israeli-Palestinian Conflict		Real
مباشر مطبخ يوم جديد الاربعاء يوم جديد	Media	Cook	Real		Media	Cook	Real	مباشر مطبخ يوم جديد الاربعاء يوم جديد	[('', 'مباشر/NN'), ('', 'مطبخ/NN'), ('', 'يوم/NN'), ('', 'جديد/JJ'), ('', 'الاربعاء/DTNN'), ('', 'الأردن/DTJJ'), ('', 'التلفزيون/DTNN'), ('', 'الأردني/DTJJ'), ('', 'يوم/NN'), ('', 'جديد/JJ')]	['اشمئزاز']	مباشر مطبخ يوم جديد اربعاء ارد تلفز اردن يوم جديد		Media		Cook		Real
جيش الاحتلال مقتل ضابط وجندي في معارك شمال قطاع غزة الليلة الماضية الأردن طوفان الأقصى غزة	Politics	Israeli-Palestinian Conflict	Real		Politics	Israeli-Palestinian Conflict	Real	جيش الاحتلال مقتل ضابط وجندي في معارك شمال قطاع غزة الليلة الماضية الأردن طوفان الأقصى غزة	[('', 'جيش/NN'), ('', 'الاحتلال/DTNN'), ('', 'مقتل/NN'), ('', 'ضابط/NN'), ('', 'وجندي/JJ'), ('', 'في/IN'), ('', 'معارك/NN'), ('', 'شمال/NN'), ('', 'قطاع/NN'), ('', 'غزة/NNP'), ('', 'الليلة/DTNN'), ('', 'الماضية/DTJJ'), ('', 'الأردن/DTJJ'), ('', 'التلفزيون/DTNN'), ('', 'الأردني/DTJJ'), ('', 'طوفان/NN'), ('', 'الأقصى/DTNN'), ('', 'غزة/NNP')]	['حزن']	جيش احتلال مقتل ضابط جند معار قطاع غز ليل ماض ارد تلفز اردن طوفا اقصى غز		Politics		Israeli-Palestinian Conflict		Real
استمرار انقطاع خدمات الاتصالات والإنترنت عن قطاع غزة لليوم السادس طوفان الأقصى غزة الأردن	Communication	International	Real		Communication	International	Real	استمرار انقطاع خدمات الاتصالات والإنترنت عن قطاع غزة لليوم السادس طوفان الأقصى غزة الأردن	[('', 'استمرار/NN'), ('', 'انقطاع/NN'), ('', 'خدمات/NNS'), ('', 'الاتصالات/DTNNS'), ('', 'والإنترنت/NN'), ('', 'عن/IN'), ('', 'قطاع/NN'), ('', 'غزة/NNP'), ('', 'لليوم/NNP'), ('السادس/ADJ', 'NUM'), ('', 'طوفان/NN'), ('', 'الأقصى/DTNN'), ('', 'غزة/NNP'), ('', 'الأردن/DTNNP'), ('', 'التلفزيون/DTNN'), ('', 'الأردني/DTJJ')]	['No Emotion Detected']	استمرار انقطاع خدم اتصال انترن قطاع غز يوم سادس طوفا اقصى غز ارد تلفز اردن		Communication		International		Real
طقس بارد في أغلب المناطق اليوم ولطيف الجمعة والسبت الأردن	Weather	Forecast	Real		Weather	Forecast	Real	طقس بارد في أغلب المناطق اليوم ولطيف الجمعة والسبت الأردن	[('', 'طقس/NN'), ('', 'بارد/JJ'), ('', 'في/IN'), ('', 'أغلب/NN'), ('', 'المناطق/DTNN'), ('', 'اليوم/DTNN'), ('', 'ولطيف/NN'), ('', 'الجمعة/DTNN'), ('', 'والسبت/VBD'), ('', 'الأردن/DTNN'), ('', 'التلفزيون/DTNN'), ('', 'الأردني/DTJJ')]	['حزن']	طقس ارد اغلب مناطق يوم لطيف جمع والسب ارد تلفز اردن		Weather		Forecast		Real
جلالة الملك يلتقي وزيرة الخارجية الأسترالية	Government	Diplomacy Relations	Real		Government	Diplomacy Relations	Real	جلالة الملك يلتقي وزيرة الخارجية الأسترالية	[('', 'جلالة/NN'), ('', 'الملك/DTNN'), ('', 'يلتقي/VBP'), ('', 'وزيرة/NN'), ('', 'الخارجية/DTNN'), ('', 'الأسترالية/DTJJ')]	['No Emotion Detected']	جلال ملك يلتق زير خارج استرال		Government		Diplomacy Relations		Real
جلالة الملك يستقبل وزير الخارجية اليوناني ويؤكد ضرورة وقف العدوان على غزة	Government	Diplomacy Relations	Real		Government	Diplomacy Relations	Real	جلالة الملك يستقبل وزير الخارجية اليوناني ويؤكد ضرورة وقف العدوان على غزة	[('', 'جلالة/NN'), ('', 'الملك/DTNN'), ('', 'يستقبل/VBP'), ('', 'وزير/NN'), ('', 'الخارجية/DTNN'), ('', 'اليوناني/DTJJ'), ('', 'ويؤكد/NNP'), ('', 'ضرورة/NN'), ('', 'وقف/NN'), ('', 'العدوان/DTNN'), ('', 'على/IN'), ('', 'غزة/NNP')]	['اشمئزاز']	جلال ملك يستقبل زير خارج يونان يوكد ضرور وقف عدو غز		Government		Diplomacy Relations		Real
مسارات زيارة ولي العهد الى سنغافورة الدلالات والنتائج ضيوف الحلقة وزير الاعلام الأسبق سميح المعايطة واستاذ العلوم السياسية في الجامعة الاردنية الدكتور محمد القطاطشة الاردن	Government	Diplomacy Relations	Real		Government	Diplomacy Relations	Real	مسارات زيارة ولي العهد الى سنغافورة الدلالات والنتائج ضيوف الحلقة وزير الاعلام الأسبق سميح المعايطة واستاذ العلوم السياسية في الجامعة الاردنية الدكتور محمد القطاطشة الاردن	[('', 'مسارات/NNS'), ('', 'زيارة/NN'), ('', 'ولي/NN'), ('', 'العهد/DTNN'), ('', 'الى/IN'), ('', 'سنغافورة/NNP'), ('', 'الدلالات/NNP'), ('', 'والنتائج/NNP'), ('', 'ضيوف/NNP'), ('', 'الحلقة/DTNN'), ('', 'وزير/NN'), ('', 'الاعلام/DTNN'), ('', 'الأسبق/DTJJ'), ('', 'سميح/NNP'), ('', 'المعايطة/DTJJ'), ('', 'واستاذ/NN'), ('', 'العلوم/DTNN'), ('', 'السياسية/DTJJ'), ('', 'في/IN'), ('', 'الجامعة/DTNN'), ('…	['Conflicting Emotions Detected']	مسار زيار ول عهد الى سنغافور دلال نتايج ضيوف حلق زير اعلام اسبق سميح معايط واستاذ علوم سياس جامع اردن دكتور محمد قطاطش ارد تلفز اردن		Government		Diplomacy Relations		Real
رئيس الديوان الملكي الهاشمي يلتقي وفدا شبابيا من خريجي الإعلام والقانون العيسوي يؤكد أهمية دور الشباب في مساندة مواقف الأردن المشرفة وجهود الملك المتواصلة لنصرة الأشقاء الفلسطينيين شباب الأردن بقيادته الهاشمية سيبقى عصيا في وجه التحديات والمؤامرات ولا صوت يعلو فوق صوت الأردن والأردنيين أكد رئيس الديوان الملكي الهاشمي يوسف حسن العيسوي أهمية دور الشباب الأردني في هذه المرحلة في مساندة موقف الأردن و…	Politics	Youth Empowerment	Real		Politics	Youth Empowerment	Real	رئيس الديوان الملكي الهاشمي يلتقي وفدا شبابيا من خريجي الإعلام والقانون العيسوي يؤكد أهمية دور الشباب في مساندة مواقف الأردن المشرفة وجهود الملك المتواصلة لنصرة الأشقاء الفلسطينيين شباب الأردن بقيادته الهاشمية سيبقى عصيا في وجه التحديات والمؤامرات ولا صوت يعلو فوق صوت الأردن والأردنيين أكد رئيس الديوان الملكي الهاشمي يوسف حسن العيسوي أهمية دور الشباب الأردني في هذه المرحلة في مساندة موقف الأردن و…	[('', 'رئيس/NN'), ('', 'الديوان/DTNN'), ('', 'الملكي/DTJJ'), ('', 'الهاشمي/DTJJ'), ('', 'يلتقي/VBP'), ('', 'وفدا/NN'), ('', 'شبابيا/JJ'), ('', 'من/IN'), ('', 'خريجي/NNS'), ('', 'الإعلام/DTNN'), ('', 'والقانون/NN'), ('', 'العيسوي/DTNN'), ('', 'يؤكد/VBP'), ('', 'أهمية/NN'), ('', 'دور/NN'), ('', 'الشباب/DTNN'), ('', 'في/IN'), ('', 'مساندة/NN'), ('', 'مواقف/NN'), ('', 'الأردن/DTNN'), ('', 'المشرفة/DT…	['Conflicting Emotions Detected']	رييس ديو ملك هاشم يلتق وفد شباب خريج اعلام قان عيسو يوكد اهم دور شباب مساند مواقف ارد مشرف جهود ملك متواصل لنصر اشقاء فلسطين شباب ارد قياد هاشم سيبقى عص وجه تحد موامر صوت يعل صوت ارد اردن اكد رييس ديو ملك هاشم يوسف حسن عيسو اهم دور شباب اردن مرحل مساند موقف ارد جهود جلال ملك عبدالل ثان لنصر اشقاء فلسطين ابراز رسال ارد حضار ثواب قضا امت عرب اسلام وف مقدم القض فلسطين قال عيسو خلال لقاء يوم ثلاثاء و…		Politics		Youth Empowerment		Real
يطلق قناة الدراما الرقميّة الجديدة عبر شبكة الإنترنت بإمكانكم مشاهدة البث المباشر عبر تطبيق أو من خلال الرابط التالي الدراما دراما أردنية	Media	Entertainment	Real		Media	Entertainment	Real	يطلق قناة الدراما الرقميّة الجديدة عبر شبكة الإنترنت بإمكانكم مشاهدة البث المباشر عبر تطبيق أو من خلال الرابط التالي الدراما دراما أردنية	[('', 'التلفزيون/DTNN'), ('', 'الأردني/DTJJ'), ('', 'يطلق/VBP'), ('', 'قناة/NN'), ('', 'الدراما/DTNNP'), ('', 'الرقمية/DTJJ'), ('', 'الجديدة/DTJJ'), ('', 'عبر/NN'), ('', 'شبكة/NN'), ('', 'الإنترنت/DTNN'), ('', 'بإمكانكم/NNP'), ('', 'مشاهدة/NN'), ('', 'البث/DTNN'), ('', 'المباشر/DTJJ'), ('', 'عبر/NN'), ('', 'تطبيق/NN'), ('', 'التلفزيون/DTNN'), ('', 'الأردني/DTJJ'), ('', 'أو/VBD'), ('', 'من/IN'), (…	['سعادة']	تلفز اردن يطلق قنا درا رقم جديد عبر شبك انتر امك مشاهد البث مباشر عبر تطبيق تلفز اردن خلال رابط تال ارد تلفز اردن درا درام اردن		Media		Entertainment		Real
وزارة البيئة استضافة منتدى الحوار الإقليمي بشأن الاستراتيجيات الوطنية للتنوع الحيوي الاردن	Environment	Local	Real		Environment	Local	Real	وزارة البيئة استضافة منتدى الحوار الإقليمي بشأن الاستراتيجيات الوطنية للتنوع الحيوي الاردن	[('', 'وزارة/NN'), ('', 'البيئة/DTNN'), ('', 'استضافة/NN'), ('', 'منتدى/NN'), ('', 'الحوار/DTNN'), ('', 'الإقليمي/DTJJ'), ('', 'بشأن/NN'), ('', 'الاستراتيجيات/DTNNS'), ('', 'الوطنية/DTJJ'), ('', 'للتنوع/DTJJ'), ('', 'الحيوي/DTJJ'), ('', 'الاردن/DTNNP'), ('', 'التلفزيون/DTNN'), ('', 'الأردني/DTJJ')]	['No Emotion Detected']	زار بيء استضاف منتدى حوار اقليم بشء استراتيج وطن تنوع حيو ارد تلفز اردن		Environment		Local		Real
المستقلة للانتخاب رئيس الهيئة يؤكد على أهمية العمل الحزبي كأساس للديمقراطية الاردن	Government	Local	Real		Government	Local	Real	المستقلة للانتخاب رئيس الهيئة يؤكد على أهمية العمل الحزبي كأساس للديمقراطية الاردن	[('', 'المستقلة/DTJJ'), ('', 'للانتخاب/VBD'), ('', 'رئيس/NN'), ('', 'الهيئة/DTNN'), ('', 'يؤكد/VBP'), ('', 'على/IN'), ('', 'أهمية/NN'), ('', 'العمل/DTNN'), ('', 'الحزبي/DTJJ'), ('', 'كأساس/NNP'), ('', 'للديمقراطية/JJ'), ('', 'الاردن/DTNNP'), ('', 'التلفزيون/DTNN'), ('', 'الأردني/DTJJ')]	['حزن']	مستقل انتخاب رييس هيء يوكد اهم عمل حزب اساس ديمقراط ارد تلفز اردن		Government		Local		Real
رئيس الوزراء في منتدى دافوس الأردن سيشارك بجلسات الاستماع الشفوية والمكتوبة بشأن قضية جنوب إفريقيا ضد إسرائيل في محكمة العدل الدولية المساعدات لا تساوي من احتياجات قطاع غزة الحلول الجزئية بشأن ما يحدث في غزة لن تنجح من الصعب على أي أردني بعد أكتوبر أن يوافق على مشاريع إقليمية مع إسرائيل السلام الشامل خيار استراتيجي للأردن وتحقيقه يتطلب شركاء جديين عاجل الأردن دافوس	Politics	Israeli-Palestinian Conflict	Real		Politics	Israeli-Palestinian Conflict	Real	رئيس الوزراء في منتدى دافوس الأردن سيشارك بجلسات الاستماع الشفوية والمكتوبة بشأن قضية جنوب إفريقيا ضد إسرائيل في محكمة العدل الدولية المساعدات لا تساوي من احتياجات قطاع غزة الحلول الجزئية بشأن ما يحدث في غزة لن تنجح من الصعب على أي أردني بعد أكتوبر أن يوافق على مشاريع إقليمية مع إسرائيل السلام الشامل خيار استراتيجي للأردن وتحقيقه يتطلب شركاء جديين عاجل الأردن دافوس	[('', 'رئيس/NN'), ('', 'الوزراء/DTNN'), ('', 'في/IN'), ('', 'منتدى/NN'), ('', 'دافوس/NNP'), ('', 'الأردن/DTNNP'), ('', 'سيشارك/NNP'), ('', 'بجلسات/NNP'), ('', 'الاستماع/DTNN'), ('', 'الشفوية/DTJJ'), ('', 'والمكتوبة/NN'), ('', 'بشأن/NNP'), ('', 'قضية/NN'), ('', 'جنوب/NN'), ('', 'إفريقيا/JJ'), ('', 'ضد/NN'), ('', 'إسرائيل/NNP'), ('', 'في/IN'), ('', 'محكمة/NN'), ('', 'العدل/DTNN'), ('', 'الدولية/DTJ…	['Conflicting Emotions Detected']	رييس وزراء منتدى دافوس ارد سيشار جلس استماع شفو مكتوب بشء قض جنوب افريق ضد اسراييل محكم عدل دول مساعد تساو احتياج قطاع غز حلول جزء بشء يحدث غز تنجح صعب ارد يوافق مشاريع اقليم اسراييل سلام شامل خيار استراتيج ارد تحقيق يتطلب شركاء جد عاجل تلفز اردن ارد دافوس		Politics		Israeli-Palestinian Conflict		Real
رئيس الوزراء في حوارية خلال منتدى دافوس الأردن سيشارك بجلسات الاستماع الشفوية والمكتوبة بشأن قضية جنوب أفريقيا ضد إسرائيل الاردن	Government	Diplomacy Relations	Real		Government	Diplomacy Relations	Real	رئيس الوزراء في حوارية خلال منتدى دافوس الأردن سيشارك بجلسات الاستماع الشفوية والمكتوبة بشأن قضية جنوب أفريقيا ضد إسرائيل الاردن	[('', 'رئيس/NN'), ('', 'الوزراء/DTNN'), ('', 'في/IN'), ('', 'حوارية/NN'), ('', 'خلال/NN'), ('', 'منتدى/NN'), ('', 'دافوس/NNP'), ('', 'الأردن/DTNNP'), ('', 'سيشارك/NNP'), ('', 'بجلسات/NNP'), ('', 'الاستماع/DTNN'), ('', 'الشفوية/DTJJ'), ('', 'والمكتوبة/NN'), ('', 'بشأن/NNP'), ('', 'قضية/NN'), ('', 'جنوب/NN'), ('', 'أفريقيا/JJ'), ('', 'ضد/NN'), ('', 'إسرائيل/NNP'), ('', 'الاردن/DTNNP'), ('', 'التلفز…	['Conflicting Emotions Detected']	رييس وزراء حوار خلال منتدى دافوس ارد سيشار جلس استماع شفو مكتوب بشء قض جنوب افريق ضد اسراييل ارد تلفز اردن		Government		Diplomacy Relations		Real
مجلس الأمة لجان برلمانية تناقش أبرز المواضيع المدرجة على جدول أعمالها الاردن غزة	Government	Parliament	Real		Government	Parliament	Real	مجلس الأمة لجان برلمانية تناقش أبرز المواضيع المدرجة على جدول أعمالها الاردن غزة	[('', 'مجلس/NN'), ('', 'الأمة/DTNN'), ('', 'لجان/NN'), ('', 'برلمانية/JJ'), ('', 'تناقش/VBN'), ('', 'أبرز/NN'), ('', 'المواضيع/DTNN'), ('', 'المدرجة/DTJJ'), ('', 'على/IN'), ('', 'جدول/NN'), ('', 'أعمالها/NN'), ('', 'الاردن/DTNNP'), ('', 'التلفزيون/DTNN'), ('', 'الأردني/DTJJ'), ('', 'غزة/NNP')]	['No Emotion Detected']	مجلس الام لجا رلمان تناقش ابرز مواضيع مدرج جدول اعمال ارد تلفز اردن غز		Government		Parliament		Real
مجلس النواب الصفدي يلتقي سفيرة جنوب إفريقيا ويؤكد تطابق المواقف في دعم الشعب الفلسطيني الاردن غزة	Government	Diplomacy Relations	Real		Government	Diplomacy Relations	Real	مجلس النواب الصفدي يلتقي سفيرة جنوب إفريقيا ويؤكد تطابق المواقف في دعم الشعب الفلسطيني الاردن غزة	[('', 'مجلس/NN'), ('', 'النواب/DTNN'), ('', 'الصفدي/DTNNP'), ('', 'يلتقي/VBP'), ('', 'سفيرة/NN'), ('', 'جنوب/NN'), ('', 'إفريقيا/JJ'), ('', 'ويؤكد/NN'), ('', 'تطابق/NN'), ('', 'المواقف/DTNN'), ('', 'في/IN'), ('', 'دعم/NN'), ('', 'الشعب/DTNN'), ('', 'الفلسطيني/DTJJ'), ('', 'الاردن/DTNNP'), ('', 'التلفزيون/DTNN'), ('', 'الأردني/DTJJ'), ('', 'غزة/NNP')]	['No Emotion Detected']	مجلس نواب صفد يلتق سفير جنوب افريق يوكد تطابق مواقف دعم شعب فلسطين ارد تلفز اردن غز		Government		Diplomacy Relations		Real
الهيئة الخيرية القوات المسلحة الأردنية ترسل شاحنة مساعدات إغاثية إلى قطاع غزة الاردن غزة	Military	Aid	Real		Military	Aid	Real	الهيئة الخيرية القوات المسلحة الأردنية ترسل شاحنة مساعدات إغاثية إلى قطاع غزة الاردن غزة	[('', 'الهيئة/DTNN'), ('', 'الخيرية/DTJJ'), ('', 'القوات/DTNNS'), ('', 'المسلحة/DTJJ'), ('', 'الأردنية/DTJJ'), ('', 'ترسل/VBP'), ('', 'شاحنة/NN'), ('', 'مساعدات/NNS'), ('', 'إغاثية/JJ'), ('', 'إلى/VBD'), ('', 'قطاع/NN'), ('', 'غزة/NNP'), ('', 'الاردن/DTNNP'), ('', 'التلفزيون/DTNN'), ('', 'الأردني/DTJJ'), ('', 'غزة/NNP')]	['سعادة']	هيء خير القو مسلح اردن ترسل شاحن مساعد اغاث قطاع غز ارد تلفز اردن غز		Military		Aid		Real
نشرة الأخبار الثلاثاء	Media	News	Fake		Media	News	Fake	نشرة الأخبار الثلاثاء	[('', 'نشرة/NN'), ('', 'الأخبار/DTNN'), ('', 'الثلاثاء/DTNN'), ('', 'الأردن/DTNN'), ('', 'التلفزيون/DTNN'), ('', 'الأردني/DTJJ')]	['اشمئزاز']	نشر اخبار ثلاثاء ارد تلفز اردن		Media		News		Fake
عاجل كتائب القسام استهدفنا دبابتين صهيونيتين وجرافة عسكرية واشتبكنا من مسافة صفر مع قوة راجلة جنوب خان يونس الأردن غزة	Politics	Israeli-Palestinian Conflict	Real		Politics	Israeli-Palestinian Conflict	Real	عاجل كتائب القسام استهدفنا دبابتين صهيونيتين وجرافة عسكرية واشتبكنا من مسافة صفر مع قوة راجلة جنوب خان يونس الأردن غزة	[('', 'عاجل/JJ'), ('', 'كتائب/NN'), ('', 'القسام/DTNNP'), ('', 'استهدفنا/VBD'), ('', 'دبابتين/NNS'), ('', 'صهيونيتين/JJ'), ('', 'وجرافة/NN'), ('', 'عسكرية/JJ'), ('', 'واشتبكنا/JJ'), ('', 'من/IN'), ('', 'مسافة/NN'), ('', 'صفر/NN'), ('', 'مع/NN'), ('', 'قوة/NN'), ('', 'راجلة/JJ'), ('', 'جنوب/NN'), ('', 'خان/NNP'), ('', 'يونس/NNP'), ('', 'الأردن/DTNNP'), ('', 'التلفزيون/DTNN'), ('', 'الأردني/DTJJ'),…	['حزن']	عاجل تايب قسام استهدف دبا صهيون جراف عسكر واشتب مساف صفر قو راجل جنوب خان يونس ارد تلفز اردن غز		Politics		Israeli-Palestinian Conflict		Real
يطلق قناة السياحة الرقميّة الجديدة عبر شبكة الإنترنت بإمكانكم مشاهدة البث المباشر عبر تطبيق أو من خلال الرابط التالي السياحة السياحة الأردنية	Media	Entertainment	Real		Media	Entertainment	Real	يطلق قناة السياحة الرقميّة الجديدة عبر شبكة الإنترنت بإمكانكم مشاهدة البث المباشر عبر تطبيق أو من خلال الرابط التالي السياحة السياحة الأردنية	[('', 'التلفزيون/DTNN'), ('', 'الأردني/DTJJ'), ('', 'يطلق/VBP'), ('', 'قناة/NN'), ('', 'السياحة/DTNN'), ('', 'الرقمية/DTJJ'), ('', 'الجديدة/DTJJ'), ('', 'عبر/NN'), ('', 'شبكة/NN'), ('', 'الإنترنت/DTNN'), ('', 'بإمكانكم/NNP'), ('', 'مشاهدة/NN'), ('', 'البث/DTNN'), ('', 'المباشر/DTJJ'), ('', 'عبر/NN'), ('', 'تطبيق/NN'), ('', 'التلفزيون/DTNN'), ('', 'الأردني/DTJJ'), ('', 'أو/VBD'), ('', 'من/IN'), ('…	['Conflicting Emotions Detected']	تلفز اردن يطلق قنا سياح رقم جديد عبر شبك انتر امك مشاهد البث مباشر عبر تطبيق تلفز اردن خلال رابط تال ارد تلفز اردن سياح سياح اردن		Media		Entertainment		Real
عاجل القوات المسلحة الأردنية ترسل شاحنة مساعدات إغاثية إلى قطاع غزة سيرت القوات المسلحة الأردنية الجيش العربي خلية المساعدات الإنسانية والإغاثية اليوم الثلاثاء بالتنسيق مع الهيئة الخيرية الأردنية الهاشمية قافلة مساعدات إغاثية وإنسانية إلى قطاع غزة وتضم القافلة شاحنة تحمل على متنها مساعدات إنسانية وغذائية بهدف مساندة الأهل والأشقاء في قطاع غزة للتخفيف من الظروف الصعبة وآثار الحرب الدائرة في القطاع…	Military	Aid	Real		Military	Aid	Real	عاجل القوات المسلحة الأردنية ترسل شاحنة مساعدات إغاثية إلى قطاع غزة سيرت القوات المسلحة الأردنية الجيش العربي خلية المساعدات الإنسانية والإغاثية اليوم الثلاثاء بالتنسيق مع الهيئة الخيرية الأردنية الهاشمية قافلة مساعدات إغاثية وإنسانية إلى قطاع غزة وتضم القافلة شاحنة تحمل على متنها مساعدات إنسانية وغذائية بهدف مساندة الأهل والأشقاء في قطاع غزة للتخفيف من الظروف الصعبة وآثار الحرب الدائرة في القطاع…	[('', 'عاجل/JJ'), ('', 'القوات/DTNNS'), ('', 'المسلحة/DTJJ'), ('', 'الأردنية/DTJJ'), ('', 'ترسل/VBP'), ('', 'شاحنة/NN'), ('', 'مساعدات/NNS'), ('', 'إغاثية/JJ'), ('', 'إلى/VBD'), ('', 'قطاع/NN'), ('', 'غزة/NNP'), ('', 'سيرت/NN'), ('', 'القوات/DTNNS'), ('', 'المسلحة/DTJJ'), ('', 'الأردنية/DTJJ'), ('', 'الجيش/DTNN'), ('', 'العربي/DTJJ'), ('', 'خلية/NN'), ('', 'المساعدات/DTNNS'), ('', 'الإنسانية/DTJJ…	['Conflicting Emotions Detected']	عاجل القو مسلح اردن ترسل شاحن مساعد اغاث قطاع غز سير القو مسلح اردن جيش عرب خل مساعد انسان اغاث يوم ثلاثاء تنسيق هيء خير اردن هاشم قافل مساعد اغاث انسان قطاع غز تضم قافل شاحن تحمل متن مساعد انسان غذاء هدف مساند اهل اشقاء قطاع غز تخفيف ظروف صعب اثار حرب داير قطاع يشار القو مسلح اردن جيش عرب تعمل تسيير مساعد انسان اغاث عبر جسر جو اخر بر ضمن جهود تبذل تخفيف معانا اهل قطاع غز وقوف جانب		Military		Aid		Real
وزارة العمل تعقد جلسات حوارية بعنوان مهن المستقبل في الاردن	Government	Employment	Real		Government	Employment	Real	وزارة العمل تعقد جلسات حوارية بعنوان مهن المستقبل في الاردن	[('', 'وزارة/NN'), ('', 'العمل/DTNN'), ('', 'تعقد/VBP'), ('', 'جلسات/NNS'), ('', 'حوارية/JJ'), ('', 'بعنوان/NN'), ('', 'مهن/NN'), ('', 'المستقبل/DTNN'), ('', 'في/IN'), ('', 'الاردن/DTNNP')]	['No Emotion Detected']	زار عمل تعقد جلس حوار عنو مهن مستقبل ارد		Government		Employment		Real
جلالة الملك عبدالله الثاني يستقبل وزيرة الخارجية الأسترالية بيني وونغ بحضور سمو الأمير الحسين بن عبدالله الثاني ولي العهد ويؤكد أهمية بلورة موقف دولي موحد لوقف العدوان الإسرائيلي على غزة أكد جلالة الملك عبدالله الثاني خلال استقباله في قصر الحسينية اليوم الثلاثاء وزيرة الخارجية الأسترالية بيني وونغ أهمية بلورة موقف دولي موحد لوقف العدوان الإسرائيلي على غزة وجدد جلالته بحضور سمو الأمير الحسين بن عب…	Politics	Israeli-Palestinian Conflict	Real		Politics	Israeli-Palestinian Conflict	Real	جلالة الملك عبدالله الثاني يستقبل وزيرة الخارجية الأسترالية بيني وونغ بحضور سمو الأمير الحسين بن عبدالله الثاني ولي العهد ويؤكد أهمية بلورة موقف دولي موحد لوقف العدوان الإسرائيلي على غزة أكد جلالة الملك عبدالله الثاني خلال استقباله في قصر الحسينية اليوم الثلاثاء وزيرة الخارجية الأسترالية بيني وونغ أهمية بلورة موقف دولي موحد لوقف العدوان الإسرائيلي على غزة وجدد جلالته بحضور سمو الأمير الحسين بن عب…	[('', 'جلالة/NN'), ('', 'الملك/DTNN'), ('', 'عبدالله/NNP'), ('الثاني/ADJ', 'NUM'), ('', 'يستقبل/VBP'), ('', 'وزيرة/NN'), ('', 'الخارجية/DTNN'), ('', 'الأسترالية/DTJJ'), ('', 'بيني/NNP'), ('', 'وونغ/NNP'), ('', 'بحضور/NNP'), ('', 'سمو/NN'), ('', 'الأمير/DTNN'), ('', 'الحسين/DTNNP'), ('', 'بن/NNP'), ('', 'عبدالله/NNP'), ('', 'الثاني/DTNNP'), ('', 'ولي/NN'), ('', 'العهد/DTNN'), ('', 'ويؤكد/NNP'), ('…	['Conflicting Emotions Detected']	جلال ملك عبدالل ثان يستقبل زير خارج استرال بين ونغ حضور سمو امير الحس بن عبدالل ثان ول عهد يوكد اهم لور موقف دول موحد لوقف عدو اسراييل غز اكد جلال ملك عبدالل ثان خلال استقبال قصر حسين يوم ثلاثاء زير خارج استرال بين ونغ اهم لور موقف دول موحد لوقف عدو اسراييل غز جدد جلال حضور سمو امير الحس بن عبدالل ثان ول عهد تاكيد ضرور سماح لسكا قطاع غز عود منازل مشدد رفض ارد لء محاول تهجير فلسطين غز والضف غرب شد…		Politics		Israeli-Palestinian Conflict		Real
جلالة الملك عبدالله الثاني يستقبل وزير الخارجية اليوناني يورجوس يرابيتريتيس بحضور سمو الأمير الحسين بن عبدالله الثاني ولي العهد ويؤكد ضرورة الوقف الفوري للعدوان الإسرائيلي على غزة ووضع حد للأزمة الإنسانية المأساوية جراء هذه الحرب استقبل جلالة الملك عبدالله الثاني في قصر الحسينية اليوم الثلاثاء وزير الخارجية اليوناني يورجوس يرابيتريتيس بحضور سمو الأمير الحسين بن عبدالله الثاني ولي العهد وتناول الل…	Politics	Israeli-Palestinian Conflict	Real		Politics	Israeli-Palestinian Conflict	Real	جلالة الملك عبدالله الثاني يستقبل وزير الخارجية اليوناني يورجوس يرابيتريتيس بحضور سمو الأمير الحسين بن عبدالله الثاني ولي العهد ويؤكد ضرورة الوقف الفوري للعدوان الإسرائيلي على غزة ووضع حد للأزمة الإنسانية المأساوية جراء هذه الحرب استقبل جلالة الملك عبدالله الثاني في قصر الحسينية اليوم الثلاثاء وزير الخارجية اليوناني يورجوس يرابيتريتيس بحضور سمو الأمير الحسين بن عبدالله الثاني ولي العهد وتناول الل…	[('', 'جلالة/NN'), ('', 'الملك/DTNN'), ('', 'عبدالله/NNP'), ('الثاني/ADJ', 'NUM'), ('', 'يستقبل/VBP'), ('', 'وزير/NN'), ('', 'الخارجية/DTNN'), ('', 'اليوناني/DTJJ'), ('', 'يورجوس/NNP'), ('', 'يرابيتريتيس/NNP'), ('', 'بحضور/NNP'), ('', 'سمو/NN'), ('', 'الأمير/DTNN'), ('', 'الحسين/DTNNP'), ('', 'بن/NNP'), ('', 'عبدالله/NNP'), ('', 'الثاني/DTNNP'), ('', 'ولي/NN'), ('', 'العهد/DTNN'), ('', 'ويؤكد/NNP…	['Conflicting Emotions Detected']	جلال ملك عبدالل ثان يستقبل زير خارج يونان يورجوس يرابيتريتيس حضور سمو امير الحس بن عبدالل ثان ول عهد يوكد ضرور وقف فور عدو اسراييل غز وضع حد ازم انسان ماساو جراء حرب استقبل جلال ملك عبدالل ثان قصر حسين يوم ثلاثاء زير خارج يونان يورجوس يرابيتريتيس حضور سمو امير الحس بن عبدالل ثان ول عهد تناول لقاء اوضاع خطير يشهد قطاع غز اكد جلال ملك ضرور وقف فور عدو اسراييل غز وضع حد ازم انسان ماساو جراء حرب وتم …		Politics		Israeli-Palestinian Conflict		Real
نشرة أخبار الثالثة الثلاثاء	Media	News	Real		Media	News	Real	نشرة أخبار الثالثة الثلاثاء	[('', 'نشرة/NN'), ('', 'أخبار/NN'), ('الثالثة/ADJ', 'NUM'), ('', 'الثلاثاء/DTNN'), ('', 'الأردن/DTNN'), ('', 'التلفزيون/DTNN'), ('', 'الأردني/DTJJ')]	['اشمئزاز']	نشر اخبار ثالث ثلاثاء ارد تلفز اردن		Media		News		Real
الجيش الإسرائيلي إصابة عسكريا في معارك قطاع غزة في الساعات الـ الماضية الأردن غزة	Politics	Israeli-Palestinian Conflict	Real		Politics	Israeli-Palestinian Conflict	Real	الجيش الإسرائيلي إصابة عسكريا في معارك قطاع غزة في الساعات الـ الماضية الأردن غزة	[('', 'الجيش/DTNN'), ('', 'الإسرائيلي/DTJJ'), ('', 'إصابة/NN'), ('', 'عسكريا/JJ'), ('', 'في/IN'), ('', 'معارك/NN'), ('', 'قطاع/NN'), ('', 'غزة/NNP'), ('', 'في/IN'), ('', 'الساعات/DTNNS'), ('', 'الـ/DTJJ'), ('', 'الماضية/DTJJ'), ('', 'الأردن/DTJJ'), ('', 'التلفزيون/DTNN'), ('', 'الأردني/DTJJ'), ('', 'غزة/NNP')]	['غضب']	جيش اسراييل اصاب عسكر معار قطاع غز ساع ال ماض ارد تلفز اردن غز		Politics		Israeli-Palestinian Conflict		Real
ارتفعت حصيلة شهداء العدوان الإسرائيلي على قطاع غزة منذ تشرين الأول الماضي حتى الثلاثاء إلى شهيدا و إصابة وقالت وزارة الصحة الفلسطينية في بيان لها اليوم الثلاثاء إن الاحتلال الإسرائيلي ارتكب مجزرة ضد العائلات في قطاع غزة راح ضحيتها شهيد و إصابة خلال الـ ساعة الماضية الأردن غزةى	Politics	Israeli-Palestinian Conflict	Real		Politics	Israeli-Palestinian Conflict	Real	ارتفعت حصيلة شهداء العدوان الإسرائيلي على قطاع غزة منذ تشرين الأول الماضي حتى الثلاثاء إلى شهيدا و إصابة وقالت وزارة الصحة الفلسطينية في بيان لها اليوم الثلاثاء إن الاحتلال الإسرائيلي ارتكب مجزرة ضد العائلات في قطاع غزة راح ضحيتها شهيد و إصابة خلال الـ ساعة الماضية الأردن غزةى	[('', 'ارتفعت/VBD'), ('', 'حصيلة/NN'), ('', 'شهداء/NN'), ('', 'العدوان/DTNN'), ('', 'الإسرائيلي/DTJJ'), ('', 'على/IN'), ('', 'قطاع/NN'), ('', 'غزة/NNP'), ('', 'منذ/IN'), ('', 'تشرين/NN'), ('', 'الأول/DTNN'), ('', 'الماضي/DTJJ'), ('', 'حتى/IN'), ('', 'الثلاثاء/DTNN'), ('', 'إلى/NN'), ('', 'شهيدا/JJ'), ('', 'و/CC'), ('', 'إصابة/NN'), ('', 'وقالت/NN'), ('', 'وزارة/NN'), ('', 'الصحة/DTNN'), ('', 'الف…	['اشمئزاز']	ارتفع حصيل شهداء عدو اسراييل قطاع غز اول ماض ثلاثاء شهيد اصاب قال زار الصح فلسطين بيا يوم ثلاثاء احتلال اسراييل ارتكب مجزر ضد عايل قطاع غز ضح شهيد اصاب خلال ال ساع ماض ارد تلفز اردن غزةى		Politics		Israeli-Palestinian Conflict		Real
تصاعد الإعتداءات الإسرائيلية في عدة مدن وبلدات في الضفة الغربية تقرير تمارا عصفور الأردن	Politics	Israeli-Palestinian Conflict	Real		Politics	Israeli-Palestinian Conflict	Real	تصاعد الإعتداءات الإسرائيلية في عدة مدن وبلدات في الضفة الغربية تقرير تمارا عصفور الأردن	[('', 'تصاعد/NN'), ('', 'الإعتداءات/DTNNS'), ('', 'الإسرائيلية/DTJJ'), ('', 'في/IN'), ('', 'عدة/NN'), ('', 'مدن/NN'), ('', 'وبلدات/NNS'), ('', 'في/IN'), ('', 'الضفة/DTNNP'), ('', 'الغربية/DTJJ'), ('', 'تقرير/NN'), ('', 'تمارا/NN'), ('', 'عصفور/NN'), ('', 'الأردن/DTNN'), ('', 'التلفزيون/DTNN'), ('', 'الأردني/DTJJ')]	['No Emotion Detected']	تصاعد اعتداء اسراييل عد مدن بلد الضف غرب تقرير تمار عصفور ارد تلفز اردن		Politics		Israeli-Palestinian Conflict		Real
آخر تطورات العدوان الإسرائيلي على غزة تقرير روان العدوان الأردن	Politics	Israeli-Palestinian Conflict	Real		Politics	Israeli-Palestinian Conflict	Real	آخر تطورات العدوان الإسرائيلي على غزة تقرير روان العدوان الأردن	[('', 'آخر/VBD'), ('', 'تطورات/NNS'), ('', 'العدوان/DTNN'), ('', 'الإسرائيلي/DTJJ'), ('', 'على/IN'), ('', 'غزة/NNP'), ('', 'تقرير/NN'), ('', 'روان/NNP'), ('', 'العدوان/DTNN'), ('', 'الأردن/DTJJ'), ('', 'التلفزيون/DTNN'), ('', 'الأردني/DTJJ')]	['اشمئزاز']	اخر تطور عدو اسراييل غز تقرير روا عدو ارد تلفز اردن		Politics		Israeli-Palestinian Conflict		Real
أمين عمان الدكتور يوسف الشواربة الأمانة أطلقت خطتها الاستراتيجية للخمس سنوات المقبلة والقادم إطلاق استراتيجية عمان مدينة ذكية الشهر المقبل الأردن	Environment	Local	Real		Environment	Local	Real	أمين عمان الدكتور يوسف الشواربة الأمانة أطلقت خطتها الاستراتيجية للخمس سنوات المقبلة والقادم إطلاق استراتيجية عمان مدينة ذكية الشهر المقبل الأردن	[('', 'أمين/NNS'), ('', 'عمان/NNP'), ('', 'الدكتور/DTNN'), ('', 'يوسف/NNP'), ('', 'الشواربة/DTNNP'), ('', 'الأمانة/DTNNP'), ('', 'أطلقت/VBD'), ('', 'خطتها/NN'), ('', 'الاستراتيجية/DTNN'), ('', 'للخمس/NN'), ('', 'سنوات/NNS'), ('', 'المقبلة/DTJJ'), ('', 'والقادم/NN'), ('', 'إطلاق/NN'), ('', 'استراتيجية/JJ'), ('', 'عمان/NNP'), ('', 'مدينة/NN'), ('', 'ذكية/JJ'), ('', 'الشهر/DTNN'), ('', 'المقبل/DTJJ'…	['No Emotion Detected']	ام عما دكتور يوسف شوارب امان اطلق خطت استراتيج خمس سنو مقبل قادم اطلاق استراتيج عما مدين ذك شهر مقبل ارد تلفز اردن		Environment		Local		Real
المبيضين الأردن يواصل جهده وحشده الدولي لوقف العدوان الإسرائيلي على قطاع غزة ورفض محاولات تهجير الفلسطينيين وإدامة إرسال المساعدات الانسانية والاغاثية إلى القطاع الأردن غزة	Politics	Israeli-Palestinian Conflict	Real		Politics	Israeli-Palestinian Conflict	Real	المبيضين الأردن يواصل جهده وحشده الدولي لوقف العدوان الإسرائيلي على قطاع غزة ورفض محاولات تهجير الفلسطينيين وإدامة إرسال المساعدات الانسانية والاغاثية إلى القطاع الأردن غزة	[('', 'المبيضين/DTNNS'), ('', 'الأردن/DTJJ'), ('', 'يواصل/VBP'), ('', 'جهده/NN'), ('', 'وحشده/JJ'), ('', 'الدولي/DTJJ'), ('', 'لوقف/NNP'), ('', 'العدوان/DTNN'), ('', 'الإسرائيلي/DTJJ'), ('', 'على/IN'), ('', 'قطاع/NN'), ('', 'غزة/NNP'), ('', 'ورفض/NNP'), ('', 'محاولات/NNS'), ('', 'تهجير/NN'), ('', 'الفلسطينيين/DTNNS'), ('', 'وإدامة/NN'), ('', 'إرسال/NN'), ('', 'المساعدات/DTNNS'), ('', 'الانسانية/D…	['اشمئزاز']	مبيض ارد يواصل جهد حشد دول لوقف عدو اسراييل قطاع غز رفض محاول تهجير فلسطين ادام ارسال مساعد انسان اغاث قطاع ارد تلفز اردن غز		Politics		Israeli-Palestinian Conflict		Real
وزير الإتصال الحكومي د مهند المبيضين أمانة عمان هي المؤسسة الأكبر في تقديم الخدمة العامة لجمهور واسع من الأردنيين الأردن	Environment	Local	Real		Environment	Local	Real	وزير الإتصال الحكومي د مهند المبيضين أمانة عمان هي المؤسسة الأكبر في تقديم الخدمة العامة لجمهور واسع من الأردنيين الأردن	[('', 'وزير/NN'), ('', 'الإتصال/DTNN'), ('', 'الحكومي/DTJJ'), ('', 'د/NN'), ('', 'مهند/NNP'), ('', 'المبيضين/DTNNS'), ('', 'أمانة/NN'), ('', 'عمان/NNP'), ('', 'هي/PRP'), ('', 'المؤسسة/DTNN'), ('', 'الأكبر/DTJJ'), ('', 'في/IN'), ('', 'تقديم/NN'), ('', 'الخدمة/DTNN'), ('', 'العامة/DTJJ'), ('', 'لجمهور/NNP'), ('', 'واسع/JJ'), ('', 'من/IN'), ('', 'الأردنيين/DTNNS'), ('', 'الأردن/DTJJ'), ('', 'التلفزي…	['No Emotion Detected']	زير اتصال حكوم مهند مبيض امان عما موسس اكبر تقديم خدم عام جمهور واسع اردن ارد تلفز اردن		Environment		Local		Real
نائب رئيس الوزراء وزير الخارجية وشؤون المغتربين أيمن الصفدي ركز الحوار مع وزيرة الخارجية الأسترالية على جهود التوصل لقرار وقف دائم لإطلاق النار في غزة نواجه تحديا أخلاقيا أمنيا إنسانيا في غزة والفشل في مواجهته سيكون له تداعيات خطيرة على صدقية النظام العالمي ومكانة العديد من الدول في المنطقة وسيأخذنا لمستقبل فيه المزيد من الصراعات والحروب نجدد رفضنا لتهجير سكان غزة ونؤكد أن أي مقاربة مستقبلية لغزة…	Politics	Israeli-Palestinian Conflict	Real		Politics	Israeli-Palestinian Conflict	Real	نائب رئيس الوزراء وزير الخارجية وشؤون المغتربين أيمن الصفدي ركز الحوار مع وزيرة الخارجية الأسترالية على جهود التوصل لقرار وقف دائم لإطلاق النار في غزة نواجه تحديا أخلاقيا أمنيا إنسانيا في غزة والفشل في مواجهته سيكون له تداعيات خطيرة على صدقية النظام العالمي ومكانة العديد من الدول في المنطقة وسيأخذنا لمستقبل فيه المزيد من الصراعات والحروب نجدد رفضنا لتهجير سكان غزة ونؤكد أن أي مقاربة مستقبلية لغزة…	[('', 'نائب/NN'), ('', 'رئيس/NN'), ('', 'الوزراء/DTNN'), ('', 'وزير/NN'), ('', 'الخارجية/DTNN'), ('', 'وشؤون/NNP'), ('', 'المغتربين/DTNNS'), ('', 'أيمن/VBD'), ('', 'الصفدي/DTNNP'), ('', 'ركز/VBD'), ('', 'الحوار/DTNN'), ('', 'مع/NN'), ('', 'وزيرة/NN'), ('', 'الخارجية/DTNN'), ('', 'الأسترالية/DTJJ'), ('', 'على/IN'), ('', 'جهود/NN'), ('', 'التوصل/DTNN'), ('', 'لقرار/NN'), ('', 'وقف/NN'), ('', 'دائم/…	['Conflicting Emotions Detected']	نايب رييس وزراء زير خارج شوو مغترب ايم صفد ركز حوار زير خارج استرال جهود توصل قرار وقف دايم اطلاق نار غز نواج تحد اخلاق امن انسان غز فشل مواج سيكو تداع خطير صدق نظام عالم مكان عديد دول منطق سياخذ مستقبل مزيد صراع حروب نجدد رفض تهجير سكا غز نوكد مقارب مستقبل لغز يجب تكو شمول يجب تستهدف حلا شامل قايم حل دولت يوم يمض عدو يذهب ضح مزيد اطفال نساء شباب فغز دمر كامل ارد تلفز اردن غز		Politics		Israeli-Palestinian Conflict		Real
مؤتمر صحفي لوزير الخارجية وشؤون المغتربين أيمن الصفدي ووزيرة الخارجية الاسترالية الأردن	Government	Diplomacy Relations	Real		Government	Diplomacy Relations	Real	مؤتمر صحفي لوزير الخارجية وشؤون المغتربين أيمن الصفدي ووزيرة الخارجية الاسترالية الأردن	[('', 'مؤتمر/NN'), ('', 'صحفي/JJ'), ('', 'لوزير/NNP'), ('', 'الخارجية/DTJJ'), ('', 'وشؤون/NN'), ('', 'المغتربين/DTNNS'), ('', 'أيمن/VBD'), ('', 'الصفدي/DTNNP'), ('', 'ووزيرة/NNP'), ('', 'الخارجية/DTJJ'), ('', 'الاسترالية/DTNN'), ('', 'الأردن/DTJJ'), ('', 'التلفزيون/DTNN'), ('', 'الأردني/DTJJ')]	['No Emotion Detected']	موتمر صحف وزير خارج شوو مغترب ايم صفد وزير خارج استرال ارد تلفز اردن		Government		Diplomacy Relations		Real
نشرة أخبار منتصف النهار الثلاثاء	Media	News	Real		Media	News	Real	نشرة أخبار منتصف النهار الثلاثاء	[('', 'نشرة/NN'), ('', 'أخبار/NN'), ('', 'منتصف/NN'), ('', 'النهار/DTNNP'), ('', 'الثلاثاء/DTNN'), ('', 'الأردن/DTNN'), ('', 'التلفزيون/DTNN'), ('', 'الأردني/DTJJ')]	['اشمئزاز']	نشر اخبار منتصف نهار ثلاثاء ارد تلفز اردن		Media		News		Real
أمين عمّان الدكتور يوسف الشواربة بالمئة نسبة الالتزام بإنجاز الخطة الإستراتيجية لأمانة عمان للعامين دونماً هي زراعة مساحات خضراء في العاصمة عمان عدد مستخدمي الباص السريع بلغ مليون راكب الأمانة تقدم خدماتها لحوالي مليون مواطن في العاصمة عمان عدد الخدمات التي جرى أتمتها في أمانة عمان و ألف ملف تم أرشفتها الأمر الذي ساهم في خفض نسبة عدد المراجعين للأمانة بنحو بالمئة مليون دينار قيمة مشاريع وأعمال ال…	Environment	Infrastructure	Real		Environment	Infrastructure	Real	أمين عمّان الدكتور يوسف الشواربة بالمئة نسبة الالتزام بإنجاز الخطة الإستراتيجية لأمانة عمان للعامين دونماً هي زراعة مساحات خضراء في العاصمة عمان عدد مستخدمي الباص السريع بلغ مليون راكب الأمانة تقدم خدماتها لحوالي مليون مواطن في العاصمة عمان عدد الخدمات التي جرى أتمتها في أمانة عمان و ألف ملف تم أرشفتها الأمر الذي ساهم في خفض نسبة عدد المراجعين للأمانة بنحو بالمئة مليون دينار قيمة مشاريع وأعمال ال…	[('', 'أمين/NNS'), ('', 'عمان/NNP'), ('', 'الدكتور/DTNN'), ('', 'يوسف/NNP'), ('', 'الشواربة/DTNNP'), ('', 'بالمئة/NN'), ('', 'نسبة/NN'), ('', 'الالتزام/DTNN'), ('', 'بإنجاز/NN'), ('', 'الخطة/DTNN'), ('', 'الإستراتيجية/DTJJ'), ('', 'لأمانة/NN'), ('', 'عمان/NNP'), ('', 'للعامين/NNP'), ('', 'دونما/NN'), ('', 'هي/PRP'), ('', 'زراعة/NN'), ('', 'مساحات/NNS'), ('', 'خضراء/JJ'), ('', 'في/IN'), ('', 'العا…	['Conflicting Emotions Detected']	ام عما دكتور يوسف شوارب المء نسب التزام انجاز الخط استراتيج امان عما عام دونم زراع مساح خضراء عاصم عما عدد مستخدم باص سريع بلغ مليو راكب امان تقدم خدما حوال مليو مواط عاصم عما عدد خدم جرى اتم امان عما ملف تم ارشف امر ساهم خفض نسب عدد مراجع امان بنح المء مليو قيم مشاريع اعمال بنى تحت امان خلال اعوام مكالم ورد مركز اتصال موحد امان عام ماض نسب رد بلغ المء رقم مركز اتصال موحد امان عما كبرى استقبال شك…		Environment		Infrastructure		Real
وزير الاتصال الحكومي الناطق الرسمي باسم الحكومة الدكتور مهند المبيضين الأردن يواصل جهده وحشده الدولي لوقف العدوان الإسرائيلي على قطاع غزة ورفض محاولات تهجير الفلسطينيين وإدامة إرسال المساعدات الانسانية والاغاثية إلى القطاع منتدى التواصل الحكومي الاتصال الحكومي الأردن	Government	Diplomacy Relations	Real		Politics	Israeli-Palestinian Conflict	Real	وزير الاتصال الحكومي الناطق الرسمي باسم الحكومة الدكتور مهند المبيضين الأردن يواصل جهده وحشده الدولي لوقف العدوان الإسرائيلي على قطاع غزة ورفض محاولات تهجير الفلسطينيين وإدامة إرسال المساعدات الانسانية والاغاثية إلى القطاع منتدى التواصل الحكومي الاتصال الحكومي الأردن	[('', 'وزير/NN'), ('', 'الاتصال/DTNN'), ('', 'الحكومي/DTJJ'), ('', 'الناطق/DTNN'), ('', 'الرسمي/DTJJ'), ('', 'باسم/NNP'), ('', 'الحكومة/DTNN'), ('', 'الدكتور/DTNN'), ('', 'مهند/NNP'), ('', 'المبيضين/DTNNS'), ('', 'الأردن/DTJJ'), ('', 'يواصل/VBP'), ('', 'جهده/NN'), ('', 'وحشده/JJ'), ('', 'الدولي/DTJJ'), ('', 'لوقف/NNP'), ('', 'العدوان/DTNN'), ('', 'الإسرائيلي/DTJJ'), ('', 'على/IN'), ('', 'قطاع/NN'…	['اشمئزاز']	زير اتصال حكوم ناطق رسم اسم حكوم دكتور مهند مبيض ارد يواصل جهد حشد دول لوقف عدو اسراييل قطاع غز رفض محاول تهجير فلسطين ادام ارسال مساعد انسان اغاث قطاع منتدى تواصل حكوم اتصال حكوم ارد تلفز اردن		Government		Diplomacy Relations		Real
وزير الاتصال الحكومي الناطق الرسمي باسم الحكومة الدكتور مهند المبيضين منتدى التواصل الحكومي هو حوار مفتوح بين المسؤولين والإعلام لتسليط الضوء على إنجازات وتحديات الوزارات والمؤسسات العامة منتدى التواصل الحكومي الاتصال الحكومي الأردن	Government	Diplomacy Relations	Real		Politics	International Relations	Real	وزير الاتصال الحكومي الناطق الرسمي باسم الحكومة الدكتور مهند المبيضين منتدى التواصل الحكومي هو حوار مفتوح بين المسؤولين والإعلام لتسليط الضوء على إنجازات وتحديات الوزارات والمؤسسات العامة منتدى التواصل الحكومي الاتصال الحكومي الأردن	[('', 'وزير/NN'), ('', 'الاتصال/DTNN'), ('', 'الحكومي/DTJJ'), ('', 'الناطق/DTNN'), ('', 'الرسمي/DTJJ'), ('', 'باسم/NNP'), ('', 'الحكومة/DTNN'), ('', 'الدكتور/DTNN'), ('', 'مهند/NNP'), ('', 'المبيضين/DTJJ'), ('', 'منتدى/NN'), ('', 'التواصل/DTNN'), ('', 'الحكومي/DTJJ'), ('', 'هو/PRP'), ('', 'حوار/NN'), ('', 'مفتوح/JJ'), ('', 'بين/NN'), ('', 'المسؤولين/DTNNS'), ('', 'والإعلام/NN'), ('', 'لتسليط/NN')…	['سعادة']	زير اتصال حكوم ناطق رسم اسم حكوم دكتور مهند مبيض منتدى تواصل حكوم حوار مفتوح مسوول اعلام تسليط ضوء انجاز تحد وزار موسس عام منتدى تواصل حكوم اتصال حكوم ارد تلفز اردن		Government		Diplomacy Relations		Real
لقاء إعلامي لوزير الإتصال الحكومي وأمين عمان مع ممثلي وسائل الإعلام بعنوان أمانة عمان التحديات والحلول الأردن	Government	Local	Real		Government	Local	Real	لقاء إعلامي لوزير الإتصال الحكومي وأمين عمان مع ممثلي وسائل الإعلام بعنوان أمانة عمان التحديات والحلول الأردن	[('', 'لقاء/NN'), ('', 'إعلامي/NNS'), ('', 'لوزير/NNP'), ('', 'الإتصال/DTNN'), ('', 'الحكومي/DTJJ'), ('', 'وأمين/NNS'), ('', 'عمان/NNP'), ('', 'مع/NN'), ('', 'ممثلي/NNS'), ('', 'وسائل/NN'), ('', 'الإعلام/DTNN'), ('', 'بعنوان/NNP'), ('', 'أمانة/NN'), ('', 'عمان/NNP'), ('', 'التحديات/DTNNS'), ('', 'والحلول/NNP'), ('', 'الأردن/DTNNP'), ('', 'التلفزيون/DTNN'), ('', 'الأردني/DTJJ')]	['No Emotion Detected']	لقاء اعلام وزير اتصال حكوم وام عما ممثل سايل اعلام عنو امان عما تحد حلول ارد تلفز اردن		Government		Local		Real
لقاء إعلامي لوزير الإتصال الحكومي وأمين عمان مع ممثلي وسائل الإعلام بعنوان أمانة عمان التحديات والحلول	Government	Local	Real		Government	Local	Real	لقاء إعلامي لوزير الإتصال الحكومي وأمين عمان مع ممثلي وسائل الإعلام بعنوان أمانة عمان التحديات والحلول	[('', 'لقاء/NN'), ('', 'إعلامي/NNS'), ('', 'لوزير/NNP'), ('', 'الإتصال/DTNN'), ('', 'الحكومي/DTJJ'), ('', 'وأمين/NNS'), ('', 'عمان/NNP'), ('', 'مع/NN'), ('', 'ممثلي/NNS'), ('', 'وسائل/NN'), ('', 'الإعلام/DTNN'), ('', 'بعنوان/NNP'), ('', 'أمانة/NN'), ('', 'عمان/NNP'), ('', 'التحديات/DTNNS'), ('', 'والحلول/NNP'), ('', 'الأردن/DTNNP'), ('', 'التلفزيون/DTNN'), ('', 'الأردني/DTJJ')]	['No Emotion Detected']	لقاء اعلام وزير اتصال حكوم وام عما ممثل سايل اعلام عنو امان عما تحد حلول ارد تلفز اردن		Government		Local		Real
يحدث اليوم الأردن	Media	General	Real		Media	General	Real	يحدث اليوم الأردن	[('', 'يحدث/VBP'), ('', 'اليوم/DTNN'), ('', 'الأردن/DTNN'), ('', 'التلفزيون/DTNN'), ('', 'الأردني/DTJJ')]	['No Emotion Detected']	يحدث يوم ارد تلفز اردن		Media		General		Real
حذرت المدير التنفيذي لبرنامج الأغذية العالمي سندي مكين من خطر الموت جوعا الذي يواجه سكان غزة بالرغم من أن الشاحنات المملوءة بالأغذية تفصلها أميال قليلة عن القطاع ونقلت الأمم المتحدة تصريحات أدلت بها مكين قالت فيها في كل ساعة ضائعة تعرض حياة عدد لا يحصى من الناس للخطر ويمكننا أن نبقي المجاعة بعيدة عنا ولكن فقط إذا تمكنا من توفير الإمدادات الكافية والوصول الآمن إلى جميع المحتاجين أينما كانوا ويؤكد …	Humanitarian	Conflict	Real		Humanitarian	Conflict	Real	حذرت المدير التنفيذي لبرنامج الأغذية العالمي سندي مكين من خطر الموت جوعا الذي يواجه سكان غزة بالرغم من أن الشاحنات المملوءة بالأغذية تفصلها أميال قليلة عن القطاع ونقلت الأمم المتحدة تصريحات أدلت بها مكين قالت فيها في كل ساعة ضائعة تعرض حياة عدد لا يحصى من الناس للخطر ويمكننا أن نبقي المجاعة بعيدة عنا ولكن فقط إذا تمكنا من توفير الإمدادات الكافية والوصول الآمن إلى جميع المحتاجين أينما كانوا ويؤكد …	[('', 'حذرت/VBD'), ('', 'المدير/DTNN'), ('', 'التنفيذي/DTJJ'), ('', 'لبرنامج/NN'), ('', 'الأغذية/DTNN'), ('', 'العالمي/DTJJ'), ('', 'سندي/NN'), ('', 'مكين/JJ'), ('', 'من/IN'), ('', 'خطر/NN'), ('', 'الموت/DTNN'), ('', 'جوعا/NNP'), ('', 'الذي/WP'), ('', 'يواجه/VBP'), ('', 'سكان/NN'), ('', 'غزة/NNP'), ('', 'بالرغم/NNP'), ('', 'من/IN'), ('', 'أن/NN'), ('', 'الشاحنات/DTNNS'), ('', 'المملوءة/DTJJ'), ('…	['Conflicting Emotions Detected']	حذر مدير تنفيذ برنامج اغذ عالم سند مك خطر الم جوع يواج سكا غز رغم شاحن مملوء اغذ تفصل اميال قليل قطاع نقل امم متحد تصريح ادل مك قال ساع ضايع تعرض حيا عدد يحصى ناس خطر ويم نبق مجاع عيد عنا فقط تمك توفير امداد كاف وصول امن محتاج كانو يوكد احدث تقرير تصنيف مرحل متكامل امن غذاء تغذ سكا غز بالغ عدد مليو نسم يعان ازم مستو اسوء انعدام امن غذاء حاد جانب قال مدير تنفيذ صندوق يونيسف كاثر رسل اطفال معرض لخط…		Humanitarian		Conflict		Real
يعقد أعضاء مجلس الأمن اليوم الثلاثاء مشاورات مغلقة بشأن اليمن ومن المتوقع أن يستمع الأعضاء إلى إحاطات بشأن اليمن من المبعوث الخاص إلى اليمن هانز جروندبرج ومن مساعد إدارة الشؤون الإنسانية جويس مسويا ومن رئيس بعثة الأمم المتحدة لدعم اتفاق الحديدة اللواء مايكل بيري وناقش المجلس الأسبوع الماضي بطلب روسي الضربات الأميركية والبريطانية على المدن اليمنية الأردن	Politics	International	Real		Politics	International	Real	يعقد أعضاء مجلس الأمن اليوم الثلاثاء مشاورات مغلقة بشأن اليمن ومن المتوقع أن يستمع الأعضاء إلى إحاطات بشأن اليمن من المبعوث الخاص إلى اليمن هانز جروندبرج ومن مساعد إدارة الشؤون الإنسانية جويس مسويا ومن رئيس بعثة الأمم المتحدة لدعم اتفاق الحديدة اللواء مايكل بيري وناقش المجلس الأسبوع الماضي بطلب روسي الضربات الأميركية والبريطانية على المدن اليمنية الأردن	[('', 'يعقد/VBP'), ('', 'أعضاء/NN'), ('', 'مجلس/NN'), ('', 'الأمن/DTNN'), ('', 'اليوم/DTNN'), ('', 'الثلاثاء/DTNN'), ('', 'مشاورات/NNS'), ('', 'مغلقة/JJ'), ('', 'بشأن/NN'), ('', 'اليمن/DTNNP'), ('', 'ومن/VBD'), ('', 'المتوقع/DTNN'), ('', 'أن/NN'), ('', 'يستمع/VBP'), ('', 'الأعضاء/DTNN'), ('', 'إلى/VBD'), ('', 'إحاطات/NNS'), ('', 'بشأن/NNP'), ('', 'اليمن/DTNNP'), ('', 'من/IN'), ('', 'المبعوث/DTNN'…	['حزن']	يعقد اعضاء مجلس امن يوم ثلاثاء مشاور مغلق بشء يمن متوقع يستمع اعضاء احاط بشء يمن مبعوث خاص يمن هانز جروندبرج مساعد ادار الشء انسان جويس مسو رييس بعث امم متحد لدعم اتفاق حديد لواء مايكل بير ناقش مجلس اسبوع ماض طلب روس ضرب اميرك ريطان مدن يمن ارد تلفز اردن		Politics		International		Real
يلتقي بعد قليل نائب رئيس الوزراء ووزير الخارجية أيمن الصفدي و نظيرته وزيرة الخارجية الأسترالية بيني وونغ في مقر الوزارة الأردن أستراليا	Politics	International Relations	Real		Politics	International Relations	Real	يلتقي بعد قليل نائب رئيس الوزراء ووزير الخارجية أيمن الصفدي و نظيرته وزيرة الخارجية الأسترالية بيني وونغ في مقر الوزارة الأردن أستراليا	[('', 'يلتقي/VBP'), ('', 'بعد/NN'), ('', 'قليل/NN'), ('', 'نائب/NN'), ('', 'رئيس/NN'), ('', 'الوزراء/DTNN'), ('', 'ووزير/NNP'), ('', 'الخارجية/DTJJ'), ('', 'أيمن/NNP'), ('', 'الصفدي/DTNNP'), ('', 'و/CC'), ('', 'نظيرته/NN'), ('', 'وزيرة/NN'), ('', 'الخارجية/DTNN'), ('', 'الأسترالية/DTJJ'), ('', 'بيني/NNP'), ('', 'وونغ/NNP'), ('', 'في/IN'), ('', 'مقر/NN'), ('', 'الوزارة/DTNN'), ('', 'الأردن/DTJJ'),…	['No Emotion Detected']	يلتق قليل نايب رييس وزراء وزير خارج ايم صفد نظير زير خارج استرال بين ونغ مقر وزار ارد استرال		Politics		International Relations		Real
قالت منظمة الصحة العالمية إن مجمع ناصر الطبي يقدم الرعاية لحوالي مريض وهو ضعف طاقته العادية ما يتطلب من المرضى تلقي العلاج على الأرض وأضافت المنظمة في تقرير إن المستشفى مٌستمر في استقبال عدد كبير من حالات الصدمات والحروق بينما تعاني وحدة العناية المركزة ووحدة الحروق من نقص حاد في الموظفين ما يؤخر العلاج المنقذ للحياة وتفيد التقارير بأن حوالي آلاف شخص يحتمون في أراضي المستشفى في الوقت الذي تتكثف ا…	Health	Israeli-Palestinian Conflict	Real		Health	Israeli-Palestinian Conflict	Real	قالت منظمة الصحة العالمية إن مجمع ناصر الطبي يقدم الرعاية لحوالي مريض وهو ضعف طاقته العادية ما يتطلب من المرضى تلقي العلاج على الأرض وأضافت المنظمة في تقرير إن المستشفى مٌستمر في استقبال عدد كبير من حالات الصدمات والحروق بينما تعاني وحدة العناية المركزة ووحدة الحروق من نقص حاد في الموظفين ما يؤخر العلاج المنقذ للحياة وتفيد التقارير بأن حوالي آلاف شخص يحتمون في أراضي المستشفى في الوقت الذي تتكثف ا…	[('', 'قالت/VBD'), ('', 'منظمة/NN'), ('', 'الصحة/DTNN'), ('', 'العالمية/DTJJ'), ('', 'إن/NN'), ('', 'مجمع/NN'), ('', 'ناصر/NNP'), ('', 'الطبي/DTJJ'), ('', 'يقدم/VBP'), ('', 'الرعاية/DTNN'), ('', 'لحوالي/NN'), ('', 'مريض/JJ'), ('', 'وهو/VBD'), ('', 'ضعف/NN'), ('', 'طاقته/NN'), ('', 'العادية/DTNN'), ('', 'ما/WP'), ('', 'يتطلب/VBP'), ('', 'من/IN'), ('', 'المرضى/DTNN'), ('', 'تلقي/VBP'), ('', 'العلاج…	['Conflicting Emotions Detected']	قال منظم الصح عالم مجمع ناصر الطب يقدم رعا حوال مريض ضعف طاق عاد يتطلب مرضى تلق علاج ارض اضاف منظم تقرير مستشفى مستمر استقبال عدد كبير حال صدم حروق ينم تعا وحد عنا مركز وحد حروق نقص حاد موظف يوخر علاج منقذ حيا تفيد تقارير بان حوال الاف شخص يحتم اراض مستشفى الو تتكثف اعتداء اسراييل محيط مستشفى يعيق صول مرضى عامل الصح يعرض حيا خطر يزيد تاكل ظايف مستشفى جهت اصدر روساء رنامج اغذ عالم صندوق يونيسيف من…		Health		Israeli-Palestinian Conflict		Real
الهلال الأحمر الفلسطيني انقطاع الاتصالات المستمر في قطاع غزة يؤخر عمليات الاستجابة الطارئة للمرضى والجرحى الأردن غزة	Health	Israeli-Palestinian Conflict	Real		Health	Israeli-Palestinian Conflict	Real	الهلال الأحمر الفلسطيني انقطاع الاتصالات المستمر في قطاع غزة يؤخر عمليات الاستجابة الطارئة للمرضى والجرحى الأردن غزة	[('', 'الهلال/DTNNP'), ('', 'الأحمر/DTNN'), ('', 'الفلسطيني/DTJJ'), ('', 'انقطاع/NN'), ('', 'الاتصالات/DTNNS'), ('', 'المستمر/DTJJ'), ('', 'في/IN'), ('', 'قطاع/NN'), ('', 'غزة/NNP'), ('', 'يؤخر/VBP'), ('', 'عمليات/NNS'), ('', 'الاستجابة/DTNN'), ('', 'الطارئة/DTJJ'), ('', 'للمرضى/NNP'), ('', 'والجرحى/NNP'), ('', 'الأردن/DTNNP'), ('', 'التلفزيون/DTNN'), ('', 'الأردني/DTJJ'), ('', 'غزة/NNP')]	['سعادة']	هلال احمر فلسطين انقطاع اتصال مستمر قطاع غز يوخر عمل استجاب طارء مرضى جرحى ارد تلفز اردن غز		Health		Israeli-Palestinian Conflict		Real
مطبخ يوم جديد الثلاثاء	Media	Cook	Real		Media	Cook	Real	مطبخ يوم جديد الثلاثاء	[('', 'مطبخ/NN'), ('', 'يوم/NN'), ('', 'جديد/JJ'), ('', 'الثلاثاء/DTNN'), ('', 'الأردن/DTNN'), ('', 'التلفزيون/DTNN'), ('', 'الأردني/DTJJ')]	['No Emotion Detected']	مطبخ يوم جديد ثلاثاء ارد تلفز اردن		Media		Cook		Real
ارتفاع قليل على درجات الحرارة وطقس بارد في أغلب المناطق اليوم م محمد صدقي متنبيء جوي ادارة الأرصاد الجوية الأردن الطقس	Weather	Forecast	Real		Weather	Forecast	Real	ارتفاع قليل على درجات الحرارة وطقس بارد في أغلب المناطق اليوم م محمد صدقي متنبيء جوي ادارة الأرصاد الجوية الأردن الطقس	[('', 'ارتفاع/NN'), ('', 'قليل/JJ'), ('', 'على/IN'), ('', 'درجات/NNS'), ('', 'الحرارة/DTNN'), ('', 'وطقس/NN'), ('', 'بارد/JJ'), ('', 'في/IN'), ('', 'أغلب/NN'), ('', 'المناطق/DTNN'), ('', 'اليوم/DTNN'), ('', 'م/IN'), ('', 'محمد/NNP'), ('', 'صدقي/NNP'), ('', 'متنبيء/JJ'), ('', 'جوي/JJ'), ('', 'ادارة/NN'), ('', 'الأرصاد/DTNN'), ('', 'الجوية/DTJJ'), ('', 'الأردن/DTJJ'), ('', 'التلفزيون/DTNN'), ('', '…	['Conflicting Emotions Detected']	ارتفاع قليل درج حرار طقس ارد اغلب مناطق يوم محمد صدق متنبيء جو ادار ارصاد الجو ارد تلفز اردن طقس		Weather		Forecast		Real
أمين عمان الدكتور يوسف الشواربة يتحدث خلال اللقاء الخامس لمنتدى التواصل الحكومي اليوم عن مشاريع واستراتيجيات أمانة عمان ويجيب على أسئلة الراهن والمستقبل المتصلة بالتحول الإلكتروني والأداء المؤسسي والمشاريع الكبرى والإنجازات التي قدمتها الأمانة خلال السنوات الأخيرة وزارة الاتصال الحكومي الأردن	Technology	Local	Real		Technology	Local	Real	أمين عمان الدكتور يوسف الشواربة يتحدث خلال اللقاء الخامس لمنتدى التواصل الحكومي اليوم عن مشاريع واستراتيجيات أمانة عمان ويجيب على أسئلة الراهن والمستقبل المتصلة بالتحول الإلكتروني والأداء المؤسسي والمشاريع الكبرى والإنجازات التي قدمتها الأمانة خلال السنوات الأخيرة وزارة الاتصال الحكومي الأردن	[('', 'أمين/NNS'), ('', 'عمان/NNP'), ('', 'الدكتور/DTNN'), ('', 'يوسف/NNP'), ('', 'الشواربة/DTNNP'), ('', 'يتحدث/VBP'), ('', 'خلال/NN'), ('', 'اللقاء/DTNN'), ('الخامس/ADJ', 'NUM'), ('', 'لمنتدى/NNP'), ('', 'التواصل/DTNN'), ('', 'الحكومي/DTJJ'), ('', 'اليوم/DTNN'), ('', 'عن/IN'), ('', 'مشاريع/NN'), ('', 'واستراتيجيات/NNS'), ('', 'أمانة/NN'), ('', 'عمان/NNP'), ('', 'ويجيب/NNP'), ('', 'على/IN'), (''…	['Conflicting Emotions Detected']	ام عما دكتور يوسف شوارب يتحدث خلال لقاء خامس منتدى تواصل حكوم يوم مشاريع واستراتيج امان عما يجيب اسيل راه مستقبل متصل تحول الكترون اداء موسس مشاريع كبرى انجاز قدم امان خلال سنو اخير زار اتصال حكوم ارد تلفز اردن		Technology		Local		Real
تواصل اللجنة المالية النيابية مناقشة مشروع قانون الموازنة العامة للسنة المالية لهيئة الأوراق المالية شركة بورصة عمّان مركز إيداع هيئة الأوراق المالية شركة المجموعة الأردنية للمناطق الحرة والمناطق التنموية المركز الوطني للأمن السيبراني المركز الوطني لمكافحة الأوبئة والأمراض السارية الأردن	Economy	Financial Policies	Real		Economy	Financial Policies	Real	تواصل اللجنة المالية النيابية مناقشة مشروع قانون الموازنة العامة للسنة المالية لهيئة الأوراق المالية شركة بورصة عمّان مركز إيداع هيئة الأوراق المالية شركة المجموعة الأردنية للمناطق الحرة والمناطق التنموية المركز الوطني للأمن السيبراني المركز الوطني لمكافحة الأوبئة والأمراض السارية الأردن	[('', 'تواصل/VBP'), ('', 'اللجنة/DTNN'), ('', 'المالية/DTJJ'), ('', 'النيابية/DTJJ'), ('', 'مناقشة/NN'), ('', 'مشروع/NN'), ('', 'قانون/NN'), ('', 'الموازنة/DTNN'), ('', 'العامة/DTJJ'), ('', 'للسنة/NN'), ('', 'المالية/DTNN'), ('', 'لهيئة/NN'), ('', 'الأوراق/DTNN'), ('', 'المالية/DTJJ'), ('', 'شركة/NN'), ('', 'بورصة/NN'), ('', 'عمان/NNP'), ('', 'مركز/NN'), ('', 'إيداع/NN'), ('', 'هيئة/NN'), ('', 'ا…	['حزن']	تواصل لجن مال نياب مناقش مشروع قانو موازن عام للسن مال لهيء اوراق مال شرك ورص عما مركز ايداع هيء اوراق مال شرك مجموع اردن مناطق الحر مناطق تنمو مركز وطن امن سيبران مركز وطن مكافح اوبء امراض سار ارد تلفز اردن		Economy		Financial Policies		Real
شهيدًا اثر استهداف منزل مأهول بالسكان في منطقة ميراج جنوب خانيونس الأردن غزة	Humanitarian	Israeli-Palestinian Conflict	Real		Politics	Israeli-Palestinian Conflict	Real	شهيدًا اثر استهداف منزل مأهول بالسكان في منطقة ميراج جنوب خانيونس الأردن غزة	[('', 'شهيدا/NN'), ('', 'اثر/NN'), ('', 'استهداف/NN'), ('', 'منزل/NN'), ('', 'مأهول/JJ'), ('', 'بالسكان/JJ'), ('', 'في/IN'), ('', 'منطقة/NN'), ('', 'ميراج/NNP'), ('', 'جنوب/NN'), ('', 'خانيونس/NNP'), ('', 'الأردن/DTNNP'), ('', 'التلفزيون/DTNN'), ('', 'الأردني/DTJJ'), ('', 'غزة/NNP')]	['خوف']	شهيد اثر استهداف منزل ماهول السك منطق ميراج جنوب خانيونس ارد تلفز اردن غز		Humanitarian		Israeli-Palestinian Conflict		Real
قصف مدفعي متواصل منذ ساعات الفجر الاولى على جباليا البلد شمال القطاع بالتزامن مع أصوات اشتباكات عنيفة الأردن غزة	Politics	Israeli-Palestinian Conflict	Real		Politics	Israeli-Palestinian Conflict	Real	قصف مدفعي متواصل منذ ساعات الفجر الاولى على جباليا البلد شمال القطاع بالتزامن مع أصوات اشتباكات عنيفة الأردن غزة	[('', 'قصف/NN'), ('', 'مدفعي/NNS'), ('', 'متواصل/JJ'), ('', 'منذ/IN'), ('', 'ساعات/NNS'), ('', 'الفجر/DTNN'), ('الاولى/ADJ', 'NUM'), ('', 'على/IN'), ('', 'جباليا/NNP'), ('', 'البلد/DTNN'), ('', 'شمال/NN'), ('', 'القطاع/DTNN'), ('', 'بالتزامن/NNP'), ('', 'مع/NN'), ('', 'أصوات/NNS'), ('', 'اشتباكات/NNS'), ('', 'عنيفة/JJ'), ('', 'الأردن/DTNN'), ('', 'التلفزيون/DTNN'), ('', 'الأردني/DTJJ'), ('', 'غزة…	['حزن']	قصف مدفع متواصل ساع فجر اولى جبال بلد قطاع تزام اصو اشتباك عنيف ارد تلفز اردن غز		Politics		Israeli-Palestinian Conflict		Real
يطرأ اليوم الثلاثاء ارتفاع قليل على درجات الحرارة وتكون الأجواء باردة في أغلب المناطق ولطيفة الحرارة في الأغوار والبحر الميت والعقبة مع ظهور بعض الغيوم على ارتفاعات مختلفة وتكون الرياح جنوبية شرقية إلى جنوبية غربية معتدلة السرعة وتحذر إدارة الأرصاد الجوية في تقريرها من احتمال تشكل الصقيع في ساعات الصباح الباكر في مناطق البادية ومن خطر تدني مدى الرؤية الأفقية في ساعات الصباح بسبب الضباب فوق المرتف…	Weather	Forecast	Real		Weather	Forecast	Real	يطرأ اليوم الثلاثاء ارتفاع قليل على درجات الحرارة وتكون الأجواء باردة في أغلب المناطق ولطيفة الحرارة في الأغوار والبحر الميت والعقبة مع ظهور بعض الغيوم على ارتفاعات مختلفة وتكون الرياح جنوبية شرقية إلى جنوبية غربية معتدلة السرعة وتحذر إدارة الأرصاد الجوية في تقريرها من احتمال تشكل الصقيع في ساعات الصباح الباكر في مناطق البادية ومن خطر تدني مدى الرؤية الأفقية في ساعات الصباح بسبب الضباب فوق المرتف…	[('', 'يطرأ/VBP'), ('', 'اليوم/DTNN'), ('', 'الثلاثاء/DTNN'), ('', 'ارتفاع/NN'), ('', 'قليل/JJ'), ('', 'على/IN'), ('', 'درجات/NNS'), ('', 'الحرارة/DTNN'), ('', 'وتكون/VN'), ('', 'الأجواء/DTNN'), ('', 'باردة/JJ'), ('', 'في/IN'), ('', 'أغلب/NN'), ('', 'المناطق/DTNN'), ('', 'ولطيفة/NN'), ('', 'الحرارة/DTNN'), ('', 'في/IN'), ('', 'الأغوار/DTNN'), ('', 'والبحر/NN'), ('', 'الميت/DTNN'), ('', 'والعقبة/N…	['Conflicting Emotions Detected']	يطرء يوم ثلاثاء ارتفاع قليل درج حرار تكو اجواء ارد اغلب مناطق لطيف حرار اغوار بحر الم عقب ظهور غيوم ارتفاع مختلف تكو رياح جنوب شرق جنوب غرب معتدل سرع تحذر ادار ارصاد الجو تقرير احتمال تشكل صقيع ساع صباح باكر مناطق باد خطر تدن مدى الرء افق ساع صباح سبب ضباب مرتفع جبل سهول حسب تقرير تغط سماء مملك يوم غد اربعاء كم غيوم ارتفاع متوسط عال قاء اجواء ارد اغلب مناطق لطيف حرار اغوار بحر الم عقب وهن احتمال …		Weather		Forecast		Real
رويترز عن مصادر أمنية مطار أربيل يوقف الملاحة الجوية بعد دوي انفجارات في المدينة	Military	Conflict	Real		Military	Conflict	Real	رويترز عن مصادر أمنية مطار أربيل يوقف الملاحة الجوية بعد دوي انفجارات في المدينة	[('', 'رويترز/NNP'), ('', 'عن/IN'), ('', 'مصادر/NN'), ('', 'أمنية/JJ'), ('', 'مطار/NN'), ('', 'أربيل/NNP'), ('', 'يوقف/VBP'), ('', 'الملاحة/DTNN'), ('', 'الجوية/DTJJ'), ('', 'بعد/NN'), ('', 'دوي/NN'), ('', 'انفجارات/NNS'), ('', 'في/IN'), ('', 'المدينة/DTNN')]	['No Emotion Detected']	رويترز مصادر امن مطار اربيل يوقف ملاح الجو دو انفجار مدين		Military		Conflict		Real
ولي العهد مبارك الفوز لنشامى منتخبنا وكل التوفيق في مبارياتنا القادمة	Sports	Football	Real		Sports	Football	Real	ولي العهد مبارك الفوز لنشامى منتخبنا وكل التوفيق في مبارياتنا القادمة	[('', 'ولي/NN'), ('', 'العهد/DTNN'), ('', 'مبارك/NNP'), ('', 'الفوز/DTNN'), ('', 'لنشامى/NNP'), ('', 'منتخبنا/NNP'), ('', 'وكل/NN'), ('', 'التوفيق/DTNN'), ('', 'في/IN'), ('', 'مبارياتنا/NN'), ('', 'القادمة/DTJJ')]	['No Emotion Detected']	ول عهد مبار فوز نشامى منتخب وكل توفيق مبار قادم		Sports		Football		Real
برباعية نظيفة النشامى يفوزون على ماليزيا في كأس آسيا الأردن	Sports	Football	Real		Sports	Football	Real	برباعية نظيفة النشامى يفوزون على ماليزيا في كأس آسيا الأردن	[('', 'برباعية/NN'), ('', 'نظيفة/JJ'), ('', 'النشامى/DTNN'), ('', 'يفوزون/VBP'), ('', 'على/IN'), ('', 'ماليزيا/NNP'), ('', 'في/IN'), ('', 'كأس/NNP'), ('', 'آسيا/VBD'), ('', 'التلفزيون/DTNN'), ('', 'الأردني/DTJJ'), ('', 'الأردن/DTJJ')]	['حزن']	رباع نظيف نشامى يفوز ماليز كاس اس تلفز اردن ارد		Sports		Football		Real
القطاع الصناعي يلتقي مدير عام دائرة الجمارك لبحث القضايا المتعلقة بالقطاع الصناعي الأردن	Economy	Local	Real		Economy	Local	Real	القطاع الصناعي يلتقي مدير عام دائرة الجمارك لبحث القضايا المتعلقة بالقطاع الصناعي الأردن	[('', 'القطاع/DTNN'), ('', 'الصناعي/DTJJ'), ('', 'يلتقي/VBP'), ('', 'مدير/NN'), ('', 'عام/JJ'), ('', 'دائرة/NN'), ('', 'الجمارك/DTNN'), ('', 'لبحث/NN'), ('', 'القضايا/DTNN'), ('', 'المتعلقة/VN'), ('', 'بالقطاع/NN'), ('', 'الصناعي/DTJJ'), ('', 'الأردن/DTJJ'), ('', 'التلفزيون/DTNN'), ('', 'الأردني/DTJJ')]	['حب']	قطاع صناع يلتق مدير عام داير جمارك لبحث قضا متعلق قطاع صناع ارد تلفز اردن		Economy		Local		Real
جلسة حوارية تناقش سبل تعزيز دور النساء في الحياة الإقتصادية في البترا الأردن	Society	Women Issues	Real		Society	Women Issues	Real	جلسة حوارية تناقش سبل تعزيز دور النساء في الحياة الإقتصادية في البترا الأردن	[('', 'جلسة/NN'), ('', 'حوارية/JJ'), ('', 'تناقش/VBN'), ('', 'سبل/NN'), ('', 'تعزيز/NN'), ('', 'دور/NN'), ('', 'النساء/DTNN'), ('', 'في/IN'), ('', 'الحياة/DTNNP'), ('', 'الإقتصادية/DTJJ'), ('', 'في/IN'), ('', 'البترا/DTNN'), ('', 'الأردن/DTJJ'), ('', 'التلفزيون/DTNN'), ('', 'الأردني/DTJJ')]	['حزن']	جلس حوار تناقش سبل تعزيز دور نساء حيا اقتصاد البت ارد تلفز اردن		Society		Women Issues		Real
اختتام البطولة الوطنية لمناظرات الجامعات الأردنية في جامعة الحسين التقنية الأردن	Education	University	Real		Education	University	Real	اختتام البطولة الوطنية لمناظرات الجامعات الأردنية في جامعة الحسين التقنية الأردن	[('', 'اختتام/NN'), ('', 'البطولة/DTNN'), ('', 'الوطنية/DTJJ'), ('', 'لمناظرات/NNS'), ('', 'الجامعات/DTNNS'), ('', 'الأردنية/DTJJ'), ('', 'في/IN'), ('', 'جامعة/NN'), ('', 'الحسين/DTNNP'), ('', 'التقنية/DTJJ'), ('', 'الأردن/DTJJ'), ('', 'التلفزيون/DTNN'), ('', 'الأردني/DTJJ')]	['حزن']	اختتام بطول وطن مناظر جامع اردن جامع الحس تقن ارد تلفز اردن		Education		University		Real
إذاعة جيش الإحتلال تعلن انسحاب الفرقة من قطاع غزة الأردن	Politics	Israeli-Palestinian Conflict	Real		Politics	Israeli-Palestinian Conflict	Real	إذاعة جيش الإحتلال تعلن انسحاب الفرقة من قطاع غزة الأردن	[('', 'إذاعة/NN'), ('', 'جيش/NN'), ('', 'الإحتلال/DTNN'), ('', 'تعلن/VBP'), ('', 'انسحاب/NN'), ('', 'الفرقة/DTNN'), ('', 'من/IN'), ('', 'قطاع/NN'), ('', 'غزة/NNP'), ('', 'الأردن/DTNNP'), ('', 'التلفزيون/DTNN'), ('', 'الأردني/DTJJ')]	['سعادة']	اذاع جيش احتلال تعل انسحاب فرق قطاع غز ارد تلفز اردن		Politics		Israeli-Palestinian Conflict		Real
الصفدي يؤكد موقف الأردن الثابت والواضح من القضية الفلسطينية الأردن	Politics	Israeli-Palestinian Conflict	Real		Politics	Israeli-Palestinian Conflict	Real	الصفدي يؤكد موقف الأردن الثابت والواضح من القضية الفلسطينية الأردن	[('', 'الصفدي/DTNNP'), ('', 'يؤكد/VBP'), ('', 'موقف/NN'), ('', 'الأردن/DTNN'), ('', 'الثابت/DTJJ'), ('', 'والواضح/NN'), ('', 'من/IN'), ('', 'القضية/DTNN'), ('', 'الفلسطينية/DTJJ'), ('', 'الأردن/DTJJ'), ('', 'التلفزيون/DTNN'), ('', 'الأردني/DTJJ')]	['No Emotion Detected']	صفد يوكد موقف ارد الثا واضح القض فلسطين ارد تلفز اردن		Politics		Israeli-Palestinian Conflict		Real
يطلق باقة جديدة ومتنوعة من القنوات عبر شبكة الإنترنت القناة السياحية قناة الدراما قناة كوميديا قناة الأرشيف قناة أغانينا قناة مطبخنا بإمكانكم مشاهدة البث المباشر لجميع هذه القنوات عبر تطبيق أو من خلال الرابط التالي	Media	Entertainment	Real		Media	Entertainment	Real	يطلق باقة جديدة ومتنوعة من القنوات عبر شبكة الإنترنت القناة السياحية قناة الدراما قناة كوميديا قناة الأرشيف قناة أغانينا قناة مطبخنا بإمكانكم مشاهدة البث المباشر لجميع هذه القنوات عبر تطبيق أو من خلال الرابط التالي	[('', 'التلفزيون/DTNN'), ('', 'الأردني/DTJJ'), ('', 'يطلق/VBP'), ('', 'باقة/NN'), ('', 'جديدة/JJ'), ('', 'ومتنوعة/JJ'), ('', 'من/IN'), ('', 'القنوات/DTNNS'), ('', 'عبر/NN'), ('', 'شبكة/NN'), ('', 'الإنترنت/DTNNP'), ('', 'القناة/DTNNP'), ('', 'السياحية/DTJJ'), ('', 'قناة/NN'), ('', 'الدراما/DTNNP'), ('', 'قناة/NN'), ('', 'كوميديا/NN'), ('', 'قناة/NN'), ('', 'الأرشيف/DTNN'), ('', 'قناة/NN'), ('', '…	['حزن']	تلفز اردن يطلق باق جديد متنوع قنو عبر شبك انتر قنا سياح قنا درا قنا وميد قنا ارشيف قنا اغان قنا مطبخ امك مشاهد البث مباشر جميع قنو عبر تطبيق تلفز اردن خلال رابط تال ارد تلفز اردن		Media		Entertainment		Real
تشييع شهيدتين فلسطينيتين توفيتا بمستشفى تركي بعد إصابتهما في غزة	Humanitarian	Israeli-Palestinian Conflict	Real		Politics	Israeli-Palestinian Conflict	Real	تشييع شهيدتين فلسطينيتين توفيتا بمستشفى تركي بعد إصابتهما في غزة	[('', 'تشييع/NN'), ('', 'شهيدتين/NNS'), ('', 'فلسطينيتين/JJ'), ('', 'توفيتا/VBN'), ('', 'بمستشفى/NN'), ('', 'تركي/JJ'), ('', 'بعد/NN'), ('', 'إصابتهما/NN'), ('', 'في/IN'), ('', 'غزة/NNP'), ('', 'التلفزيون/DTNN'), ('', 'الأردني/DTJJ')]	['حزن']	تشييع شه سطين توف مستشفى ترك اصاب غز تلفز اردن		Humanitarian		Israeli-Palestinian Conflict		Real
نــشـرة الأخبار الرئيسية الإثــنين	Media	News	Real		Media	News	Real	نــشـرة الأخبار الرئيسية الإثــنين	[('', 'نــشـرة/NN'), ('', 'الأخبار/DTNN'), ('', 'الرئيسية/DTJJ'), ('', 'الإثــنين/DTJJ'), ('', 'التلفزيون/DTNN'), ('', 'الأردني/DTJJ')]	['حزن']	نشر اخبار رييس اثن تلفز اردن		Media		News		Real
فاسألوا أهل الذكر بوصلتنا فلسطين وتاجها القدس الشريف	Religion	Islamic	Real		Religion	Islamic	Real	فاسألوا أهل الذكر بوصلتنا فلسطين وتاجها القدس الشريف	[('', 'فاسألوا/VBD'), ('', 'أهل/NN'), ('', 'الذكر/DTNN'), ('', 'بوصلتنا/NNP'), ('', 'فلسطين/NNP'), ('', 'وتاجها/NN'), ('', 'القدس/DTNNP'), ('', 'الشريف/DTJJ'), ('', 'التلفزيون/DTNN'), ('', 'الأردني/DTJJ')]	['اشمئزاز']	فاسال اهل ذكر وصل لسط تاج قدس شريف تلفز اردن		Religion		Islamic		Real
يطلق باقة جديدة من القنوات المتنوعة عبر شبكة الإنترنت تقرير لينا القرعان الأردن	Media	Entertainment	Real		Media	Entertainment	Real	يطلق باقة جديدة من القنوات المتنوعة عبر شبكة الإنترنت تقرير لينا القرعان الأردن	[('', 'التلفزيون/DTNN'), ('', 'الأردني/DTJJ'), ('', 'يطلق/VBP'), ('', 'باقة/NN'), ('', 'جديدة/JJ'), ('', 'من/IN'), ('', 'القنوات/DTNNS'), ('', 'المتنوعة/DTJJ'), ('', 'عبر/NN'), ('', 'شبكة/NN'), ('', 'الإنترنت/DTNN'), ('', 'تقرير/NN'), ('', 'لينا/NNP'), ('', 'القرعان/DTNNP'), ('', 'الأردن/DTJJ'), ('', 'التلفزيون/DTNN'), ('', 'الأردني/DTJJ')]	['سعادة']	تلفز اردن يطلق باق جديد قنو متنوع عبر شبك انتر تقرير لين قرع ارد تلفز اردن		Media		Entertainment		Real
الطراونة المؤسسة تجري حالياً دراسة اكتوارية هي الحادية عشرة الأردن الضمان الاجتماعي	Economy	Local	Real		Economy	Local	Real	الطراونة المؤسسة تجري حالياً دراسة اكتوارية هي الحادية عشرة الأردن الضمان الاجتماعي	[('', 'الطراونة/DTNN'), ('', 'المؤسسة/DTNN'), ('', 'تجري/VBP'), ('', 'حاليا/NN'), ('', 'دراسة/NN'), ('', 'اكتوارية/JJ'), ('', 'هي/PRP'), ('', 'الحادية/DTJJ'), ('', 'عشرة/JJ'), ('', 'الأردن/DTNN'), ('', 'التلفزيون/DTNN'), ('', 'الأردني/DTJJ'), ('', 'الضمان/DTNN'), ('', 'الاجتماعي/DTJJ')]	['اشمئزاز']	طراون موسس تجر حال دراس اكتوار حاد ارد تلفز اردن الضم اجتماع		Economy		Local		Real
يعيد افتتاح أقدم مركز أمني في الأردن للعمل كسرية للهجانة	Military	Local	Real		Military	Local	Real	يعيد افتتاح أقدم مركز أمني في الأردن للعمل كسرية للهجانة	[('', 'الأمن/DTNN'), ('', 'العام/DTJJ'), ('', 'يعيد/VBP'), ('', 'افتتاح/NN'), ('', 'أقدم/NN'), ('', 'مركز/NN'), ('', 'أمني/JJ'), ('', 'في/IN'), ('', 'الأردن/DTNN'), ('', 'للعمل/NN'), ('', 'كسرية/JJ'), ('', 'للهجانة/NN'), ('', 'التلفزيون/DTNN'), ('', 'الأردني/DTJJ')]	['No Emotion Detected']	امن عام يعيد افتتاح اقدم مركز امن ارد عمل كسر هجان تلفز اردن		Military		Local		Real
مشتركة الأعيان تطلع على برامج وخطط جمعية الهلال الأحمر الأردني الأردن	Government	Parliament	Real		Government	Parliament	Real	مشتركة الأعيان تطلع على برامج وخطط جمعية الهلال الأحمر الأردني الأردن	[('', 'مشتركة/JJ'), ('', 'الأعيان/DTNN'), ('', 'تطلع/VBP'), ('', 'على/IN'), ('', 'برامج/NN'), ('', 'وخطط/NN'), ('', 'جمعية/NN'), ('', 'الهلال/DTNNP'), ('', 'الأحمر/DTJJ'), ('', 'الأردني/DTJJ'), ('', 'الأردن/DTJJ'), ('', 'التلفزيون/DTNN'), ('', 'الأردني/DTJJ')]	['No Emotion Detected']	مشترك الاع تطلع رامج خطط جمع هلال احمر اردن ارد تلفز اردن		Government		Parliament		Real
خارجية النواب تبحث والسفير البلجيكي العلاقات الثنائية الأردن	Government	Diplomacy Relations	Real		Government	Diplomacy Relations	Real	خارجية النواب تبحث والسفير البلجيكي العلاقات الثنائية الأردن	[('', 'خارجية/NN'), ('', 'النواب/DTNN'), ('', 'تبحث/VBP'), ('', 'والسفير/NN'), ('', 'البلجيكي/DTNN'), ('', 'العلاقات/DTNNS'), ('', 'الثنائية/DTJJ'), ('', 'الأردن/DTJJ'), ('', 'التلفزيون/DTNN'), ('', 'الأردني/DTJJ')]	['No Emotion Detected']	خارج نواب تبحث سفير بلجيك علاق ثناء ارد تلفز اردن		Government		Diplomacy Relations		Real
وزير الخارجية خلال لقاءه نظيره اليوناني الموقف الأردني الثابت هو الوقف الفوري للعدوان الأردن بصدد تقديم مرافعات شفهية بما يعكس موقفه الرافض لكل ما يجري من عدوان على غزة ما دخل غزة من مساعدات حتى الآن وفق التقديرات الأممية لا يتجاوز من حاجة القطاع غزة الأردن اليونان	Government	Diplomacy Relations	Real		Government	Diplomacy Relations	Real	وزير الخارجية خلال لقاءه نظيره اليوناني الموقف الأردني الثابت هو الوقف الفوري للعدوان الأردن بصدد تقديم مرافعات شفهية بما يعكس موقفه الرافض لكل ما يجري من عدوان على غزة ما دخل غزة من مساعدات حتى الآن وفق التقديرات الأممية لا يتجاوز من حاجة القطاع غزة الأردن اليونان	[('', 'وزير/NN'), ('', 'الخارجية/DTNN'), ('', 'خلال/NN'), ('', 'لقاءه/NN'), ('', 'نظيره/NN'), ('', 'اليوناني/DTNN'), ('', 'الموقف/DTNN'), ('', 'الأردني/DTJJ'), ('', 'الثابت/DTJJ'), ('', 'هو/PRP'), ('', 'الوقف/DTNN'), ('', 'الفوري/DTJJ'), ('', 'للعدوان/NNP'), ('', 'الأردن/DTNNP'), ('', 'بصدد/NNP'), ('', 'تقديم/NN'), ('', 'مرافعات/NNS'), ('', 'شفهية/JJ'), ('', 'بما/NN'), ('', 'يعكس/VBP'), ('', 'موق…	['Conflicting Emotions Detected']	زير خارج خلال لقاء نظير يونان موقف اردن الثا وقف فور عدو ارد صدد تقديم مرافع شفه يعكس موقف رافض لكل يجر عدوا غز دخل غز مساعد وفق تقدير امم يتجاوز حاج قطاع تلفز اردن غز ارد يون		Government		Diplomacy Relations		Real
مؤتمر صحفي مشترك لوزير الخارجية وشؤون المغتربين ونظيرة اليوناني الأردن	Government	Diplomacy Relations	Real		Government	Diplomacy Relations	Real	مؤتمر صحفي مشترك لوزير الخارجية وشؤون المغتربين ونظيرة اليوناني الأردن	[('', 'مؤتمر/NN'), ('', 'صحفي/JJ'), ('', 'مشترك/JJ'), ('', 'لوزير/NNP'), ('', 'الخارجية/DTJJ'), ('', 'وشؤون/NN'), ('', 'المغتربين/DTNNS'), ('', 'ونظيرة/NN'), ('', 'اليوناني/DTNN'), ('', 'الأردن/DTJJ'), ('', 'التلفزيون/DTNN'), ('', 'الأردني/DTJJ')]	['No Emotion Detected']	موتمر صحف مشتر وزير خارج شوو مغترب نظير يونان ارد تلفز اردن		Government		Diplomacy Relations		Real
جلالة الملك يتلقى اتصالاً هاتفياً من رئيس وزراء هولندا الأردن	Government	Diplomacy Relations	Real		Government	Diplomacy Relations	Real	جلالة الملك يتلقى اتصالاً هاتفياً من رئيس وزراء هولندا الأردن	[('', 'جلالة/NN'), ('', 'الملك/DTNN'), ('', 'يتلقى/VBP'), ('', 'اتصالا/NN'), ('', 'هاتفيا/JJ'), ('', 'من/IN'), ('', 'رئيس/NN'), ('', 'وزراء/NN'), ('', 'هولندا/NNP'), ('', 'الأردن/DTNNP'), ('', 'التلفزيون/DTNN'), ('', 'الأردني/DTJJ')]	['خوف']	جلال ملك يتلقى اتصال هاتف رييس زراء هولند ارد تلفز اردن		Government		Diplomacy Relations		Real
نـشـرة الأخـــبـار الــمحـليـة الإثــنيـن	Media	News	Real		Media	News	Real	نـشـرة الأخـــبـار الــمحـليـة الإثــنيـن	[('', 'نـشـرة/NN'), ('', 'الأخـــبـار/DTNN'), ('', 'الــمحـليـة/DTJJ'), ('', 'الإثــنيـن/DTJJ'), ('', 'التلفزيون/DTNN'), ('', 'الأردني/DTJJ')]	['No Emotion Detected']	نشر اخبار محل اثن تلفز اردن		Media		News		Real
برنامج بين السطور قراءة وتحليل لأبرز ماتداوله الكتّاب في الصحف المحليّة والعربيّة والعالميّة الاردن	Media	Analysis	Real		Media	Analysis	Real	برنامج بين السطور قراءة وتحليل لأبرز ماتداوله الكتّاب في الصحف المحليّة والعربيّة والعالميّة الاردن	[('', 'برنامج/NN'), ('', 'بين/NN'), ('', 'السطور/DTNN'), ('', 'قراءة/NN'), ('', 'وتحليل/NN'), ('', 'لأبرز/NNP'), ('', 'ماتداوله/NNP'), ('', 'الكتاب/DTNN'), ('', 'في/IN'), ('', 'الصحف/DTNN'), ('', 'المحلية/DTJJ'), ('', 'والعربية/NN'), ('', 'والعالمية/JJ'), ('', 'الاردن/DTNNP'), ('', 'التلفزيون/DTNN'), ('', 'الأردني/DTJJ')]	['No Emotion Detected']	رنامج سطور قراء تحليل ابرز ماتداول كتاب صحف محل عرب عالم ارد تلفز اردن		Media		Analysis		Real
جلالة الملك عبدالله الثاني يتلقى اتصالا هاتفيا من رئيس وزراء هولندا مارك روته أعاد جلالته خلاله التأكيد على ضرورة ضغط المجتمع الدولي لوقف العدوان الإسرائيلي على قطاع غزة محذرا من تصاعد الخطاب المتطرف من المسؤولين الإسرائيليين الأردن	Government	Diplomacy Relations	Real		Government	Diplomacy Relations	Real	جلالة الملك عبدالله الثاني يتلقى اتصالا هاتفيا من رئيس وزراء هولندا مارك روته أعاد جلالته خلاله التأكيد على ضرورة ضغط المجتمع الدولي لوقف العدوان الإسرائيلي على قطاع غزة محذرا من تصاعد الخطاب المتطرف من المسؤولين الإسرائيليين الأردن	[('', 'جلالة/NN'), ('', 'الملك/DTNN'), ('', 'عبدالله/NNP'), ('الثاني/ADJ', 'NUM'), ('', 'يتلقى/VBP'), ('', 'اتصالا/NN'), ('', 'هاتفيا/JJ'), ('', 'من/IN'), ('', 'رئيس/NN'), ('', 'وزراء/NN'), ('', 'هولندا/NNP'), ('', 'مارك/NNP'), ('', 'روته/NNP'), ('', 'أعاد/NNP'), ('', 'جلالته/NNP'), ('', 'خلاله/NNP'), ('', 'التأكيد/DTNN'), ('', 'على/IN'), ('', 'ضرورة/NN'), ('', 'ضغط/NN'), ('', 'المجتمع/DTNN'), ('…	['سعادة']	جلال ملك عبدالل ثان يتلقى اتصال هاتف رييس زراء هولند مار روت اعاد جلال خلال تاكيد ضرور ضغط مجتمع دول لوقف عدو اسراييل قطاع غز محذر تصاعد خطاب متطرف مسوول اسراييل ارد		Government		Diplomacy Relations		Real
وزير الخارجية يشدد على ضرورة اضطلاع المجتمع الدولي بمسؤلياته والعمل على وقف الحرب والكارثة الإنسانية انسجاما مع قرارات الشرعية الدولية الداعية لوقف الحرب غزة	Politics	Israeli-Palestinian Conflict	Real		Politics	Israeli-Palestinian Conflict	Real	وزير الخارجية يشدد على ضرورة اضطلاع المجتمع الدولي بمسؤلياته والعمل على وقف الحرب والكارثة الإنسانية انسجاما مع قرارات الشرعية الدولية الداعية لوقف الحرب غزة	[('', 'وزير/NN'), ('', 'الخارجية/DTNN'), ('', 'يشدد/VBP'), ('', 'على/IN'), ('', 'ضرورة/NN'), ('', 'اضطلاع/NN'), ('', 'المجتمع/DTNN'), ('', 'الدولي/DTJJ'), ('', 'بمسؤلياته/NNP'), ('', 'والعمل/NNP'), ('', 'على/IN'), ('', 'وقف/NN'), ('', 'الحرب/DTNN'), ('', 'والكارثة/NN'), ('', 'الإنسانية/DTNN'), ('', 'انسجاما/NN'), ('', 'مع/NN'), ('', 'قرارات/NNS'), ('', 'الشرعية/DTNN'), ('', 'الدولية/DTJJ'), ('', …	['سعادة']	زير خارج يشدد ضرور اضطلاع مجتمع دول مسول عمل وقف حرب كارث انسان انسجام قرار شرع دول داع لوقف حرب غز تلفز اردن		Politics		Israeli-Palestinian Conflict		Real
وزير الخارجية يستقبل وفد منظمة كنائس من أجل السلام في الشرق الأوسط لبحث تداعيات العدوان الإسرائيلي على غزة وتناول اللقاء الإجراءات الإسرائيلية والقيود التي تفرضها إسرائيل على حرية العبادة وضرورة وقفها ووقف عنف المستوطنيين	Politics	Israeli-Palestinian Conflict	Real		Politics	Israeli-Palestinian Conflict	Real	وزير الخارجية يستقبل وفد منظمة كنائس من أجل السلام في الشرق الأوسط لبحث تداعيات العدوان الإسرائيلي على غزة وتناول اللقاء الإجراءات الإسرائيلية والقيود التي تفرضها إسرائيل على حرية العبادة وضرورة وقفها ووقف عنف المستوطنيين	[('', 'وزير/NN'), ('', 'الخارجية/DTNN'), ('', 'يستقبل/VBP'), ('', 'وفد/NN'), ('', 'منظمة/NN'), ('', 'كنائس/NN'), ('', 'من/IN'), ('', 'أجل/NN'), ('', 'السلام/DTNN'), ('', 'في/IN'), ('', 'الشرق/DTNN'), ('', 'الأوسط/DTJJ'), ('', 'لبحث/NN'), ('', 'تداعيات/NNS'), ('', 'العدوان/DTNN'), ('', 'الإسرائيلي/DTJJ'), ('', 'على/IN'), ('', 'غزة/NNP'), ('', 'وتناول/NNP'), ('', 'اللقاء/DTNN'), ('', 'الإجراءات/DTN…	['Conflicting Emotions Detected']	زير خارج يستقبل وفد منظم نايس سلام شرق اوسط لبحث تداع عدو اسراييل غز تناول لقاء اجراء اسراييل قيود تفرض اسراييل حر عباد ضرور وقف وقف عنف مستوطن تلفز اردن		Politics		Israeli-Palestinian Conflict		Real
هيئة البث الإسرائيلية مقتل امرأة وإصابة بجروح خطيرة و بجروح متوسطة في عمليات الدهس والطعن في رعنانا الأردن	Politics	International	Real		Politics	International	Real	هيئة البث الإسرائيلية مقتل امرأة وإصابة بجروح خطيرة و بجروح متوسطة في عمليات الدهس والطعن في رعنانا الأردن	[('', 'هيئة/NN'), ('', 'البث/DTNN'), ('', 'الإسرائيلية/DTJJ'), ('', 'مقتل/NN'), ('', 'امرأة/NN'), ('', 'وإصابة/NN'), ('', 'بجروح/NN'), ('', 'خطيرة/JJ'), ('', 'و/CC'), ('', 'بجروح/NN'), ('', 'متوسطة/JJ'), ('', 'في/IN'), ('', 'عمليات/NNS'), ('', 'الدهس/DTNN'), ('', 'والطعن/NNP'), ('', 'في/IN'), ('', 'رعنانا/NNP'), ('', 'الأردن/DTNNP'), ('', 'التلفزيون/DTNN'), ('', 'الأردني/DTJJ')]	['حزن']	هيء البث اسراييل مقتل امرء اصاب جروح خطير جروح متوسط عمل دهس والطع رعن ارد تلفز اردن		Politics		International		Real
وسائل إعلام إسرائيلية مقتل شخص وإصابة على الأقل بجروح خطيرة في حوادث الدهس والطعن في رعنانا الأردن	Politics	International	Real		Politics	International	Real	وسائل إعلام إسرائيلية مقتل شخص وإصابة على الأقل بجروح خطيرة في حوادث الدهس والطعن في رعنانا الأردن	[('', 'وسائل/NN'), ('', 'إعلام/NN'), ('', 'إسرائيلية/JJ'), ('', 'مقتل/NN'), ('', 'شخص/NN'), ('', 'وإصابة/JJ'), ('', 'على/IN'), ('', 'الأقل/DTNN'), ('', 'بجروح/NNP'), ('', 'خطيرة/JJ'), ('', 'في/IN'), ('', 'حوادث/NN'), ('', 'الدهس/DTNN'), ('', 'والطعن/NNP'), ('', 'في/IN'), ('', 'رعنانا/NNP'), ('', 'الأردن/DTNNP'), ('', 'التلفزيون/DTNN'), ('', 'الأردني/DTJJ')]	['حزن']	سايل اعلام اسراييل مقتل شخص اصاب اقل جروح خطير حوادث دهس والطع رعن ارد تلفز اردن		Politics		International		Real
تدابير رسمية لمواجهة تداعيات أزمة البحر الأحمر الأردن	Government	Decisions	Real		Government	Decisions	Real	تدابير رسمية لمواجهة تداعيات أزمة البحر الأحمر الأردن	[('', 'تدابير/NN'), ('', 'رسمية/JJ'), ('', 'لمواجهة/NN'), ('', 'تداعيات/NNS'), ('', 'أزمة/NN'), ('', 'البحر/DTNN'), ('', 'الأحمر/DTNN'), ('', 'الأردن/DTJJ'), ('', 'التلفزيون/DTNN'), ('', 'الأردني/DTJJ')]	['No Emotion Detected']	تدابير رسم مواجه تداع ازم بحر احمر ارد تلفز اردن		Government		Decisions		Real
مصر والصين تطالبان بوقف للنار في غزة وإقامة دولة فلسطينية طوفان الأقصى الأردن	Politics	Israeli-Palestinian Conflict	Real		Politics	Israeli-Palestinian Conflict	Real	مصر والصين تطالبان بوقف للنار في غزة وإقامة دولة فلسطينية طوفان الأقصى الأردن	[('', 'مصر/NNP'), ('', 'والصين/NNP'), ('', 'تطالبان/VBP'), ('', 'بوقف/NNP'), ('', 'للنار/NNP'), ('', 'في/IN'), ('', 'غزة/NNP'), ('', 'وإقامة/NN'), ('', 'دولة/NN'), ('', 'فلسطينية/JJ'), ('', 'طوفان/NN'), ('', 'الأقصى/DTNN'), ('', 'الأردن/DTJJ'), ('', 'التلفزيون/DTNN'), ('', 'الأردني/DTJJ')]	['No Emotion Detected']	مصر والص تطالب وقف نار غز اقام دول سطين طوفا اقصى ارد تلفز اردن		Politics		Israeli-Palestinian Conflict		Real
مدير يشارك مرتبات الهجّانة بزراعة صحراء باير ويعيد افتتاح أقدم مركز أمني في الأردن للعمل كسرية للهجّانة بعد إعادة ترميمه رعى مدير اللواء الدكتور عبيد الله المعايطة اليوم الفعالية التي أقامتها وحدة الهجّانة بمنطقة باير في محافظة معان بمناسبة يوم الشجرة والتي تأتي ضمن المبادرة الوطنية لزراعة عشرة ملايين شجرة في مختلف مناطق المملكة وقال اللواء المعايطة إنّ مديرية تسعى إلى بذل المزيد من الجهود الهادف…	Military	National Security	Real		Military	National Security	Real	مدير يشارك مرتبات الهجّانة بزراعة صحراء باير ويعيد افتتاح أقدم مركز أمني في الأردن للعمل كسرية للهجّانة بعد إعادة ترميمه رعى مدير اللواء الدكتور عبيد الله المعايطة اليوم الفعالية التي أقامتها وحدة الهجّانة بمنطقة باير في محافظة معان بمناسبة يوم الشجرة والتي تأتي ضمن المبادرة الوطنية لزراعة عشرة ملايين شجرة في مختلف مناطق المملكة وقال اللواء المعايطة إنّ مديرية تسعى إلى بذل المزيد من الجهود الهادف…	[('', 'مدير/NN'), ('', 'الأمن/DTNN'), ('', 'العام/DTJJ'), ('', 'يشارك/VBP'), ('', 'مرتبات/NNS'), ('', 'الهجانة/DTNN'), ('', 'بزراعة/NN'), ('', 'صحراء/NN'), ('', 'باير/NNP'), ('', 'ويعيد/NNP'), ('', 'افتتاح/NN'), ('', 'أقدم/NN'), ('', 'مركز/NN'), ('', 'أمني/JJ'), ('', 'في/IN'), ('', 'الأردن/DTNN'), ('', 'للعمل/NN'), ('', 'كسرية/JJ'), ('', 'للهجانة/NN'), ('', 'بعد/NN'), ('', 'إعادة/NN'), ('', 'ترمي…	['Conflicting Emotions Detected']	مدير امن عام يشار مرتب هجان زراع صحراء اير يعيد افتتاح اقدم مركز امن ارد عمل كسر هجان اعاد ترميم رعى مدير امن عام لواء دكتور عبيد الله معايط يوم فعال اقام وحد هجان منطق اير محافظ معا مناسب يوم شجر وال تات ضمن مبادر وطن زراع ملا شجر مختلف مناطق مملك قال لواء معايط إن مدير امن عام تسعى بذل مزيد جهود هادف زياد الوع اهم حفاظ بيء والحث زراع اشجار نبات وبم يضم حفاظ مكون بيء تتصل طبيع اردن تعزيز استدام …		Military		National Security		Real
طلبة الثانوية العامة للدورة التكميلية يختتمون امتحاناتهم الأردن	Education	School	Real		Education	School	Real	طلبة الثانوية العامة للدورة التكميلية يختتمون امتحاناتهم الأردن	[('', 'طلبة/NN'), ('', 'الثانوية/DTNN'), ('', 'العامة/DTJJ'), ('', 'للدورة/NNP'), ('', 'التكميلية/DTJJ'), ('', 'يختتمون/VBP'), ('', 'امتحاناتهم/NN'), ('', 'الأردن/DTNN'), ('', 'التلفزيون/DTNN'), ('', 'الأردني/DTJJ')]	['حزن']	طلب ثانو عام دور تكميل يختتم امتح ارد تلفز اردن		Education		School		Real
مندوباً عن جلالة الملك رئيس الديوان الملكي يرعى الاحتفال بيوم الشجرة بالقطرانة الأردن	Society	Local	Real		Society	Local	Real	مندوباً عن جلالة الملك رئيس الديوان الملكي يرعى الاحتفال بيوم الشجرة بالقطرانة الأردن	[('', 'مندوبا/NN'), ('', 'عن/IN'), ('', 'جلالة/NN'), ('', 'الملك/DTNN'), ('', 'رئيس/NN'), ('', 'الديوان/DTNN'), ('', 'الملكي/DTJJ'), ('', 'يرعى/VBP'), ('', 'الاحتفال/DTNN'), ('', 'بيوم/NN'), ('', 'الشجرة/DTNN'), ('', 'بالقطرانة/NNP'), ('', 'الأردن/DTNNP'), ('', 'التلفزيون/DTNN'), ('', 'الأردني/DTJJ')]	['No Emotion Detected']	مندوب جلال ملك رييس ديو ملك يرعى احتفال يوم شجر قطران ارد تلفز اردن		Society		Local		Real
نشرة أخبار الثالثة الأثنين	Media	News	Real		Media	News	Real	نشرة أخبار الثالثة الأثنين	[('', 'نشرة/NN'), ('', 'أخبار/NN'), ('الثالثة/ADJ', 'NUM'), ('', 'الأثنين/DTNNS'), ('', 'الأردن/DTJJ'), ('', 'التلفزيون/DTNN'), ('', 'الأردني/DTJJ')]	['اشمئزاز']	نشر اخبار ثالث اثن ارد تلفز اردن		Media		News		Real
قتلت قوات الاحتلال بواسطة مسيرة اليوم الاثنين إسرائيليا ظنا انه فلسطيني عند عودته إلى السياج الأمني بعد دخوله غزة للمشاركة بالقتال وأشارت صحيفة هآرتس الإسرائيلية إلى أن المسيرة أطلقت النار على الإسرائيلي قبل أن تكشف عن هويته ظنا أنه فلسطيني ويواصل الاحتلال عدوانه على قطاع غزة لليوم بقصف جوي ومدفعي مكثف لعدة مناطق في القطاع الأردن غزة	Politics	Israeli-Palestinian Conflict	Real		Politics	Israeli-Palestinian Conflict	Real	قتلت قوات الاحتلال بواسطة مسيرة اليوم الاثنين إسرائيليا ظنا انه فلسطيني عند عودته إلى السياج الأمني بعد دخوله غزة للمشاركة بالقتال وأشارت صحيفة هآرتس الإسرائيلية إلى أن المسيرة أطلقت النار على الإسرائيلي قبل أن تكشف عن هويته ظنا أنه فلسطيني ويواصل الاحتلال عدوانه على قطاع غزة لليوم بقصف جوي ومدفعي مكثف لعدة مناطق في القطاع الأردن غزة	[('', 'قتلت/VBD'), ('', 'قوات/NNS'), ('', 'الاحتلال/DTNN'), ('', 'بواسطة/NNP'), ('', 'مسيرة/NN'), ('', 'اليوم/DTNN'), ('', 'الاثنين/DTNN'), ('', 'إسرائيليا/NN'), ('', 'ظنا/NN'), ('', 'انه/NN'), ('', 'فلسطيني/JJ'), ('', 'عند/NN'), ('', 'عودته/NN'), ('', 'إلى/VBD'), ('', 'السياج/DTNN'), ('', 'الأمني/DTJJ'), ('', 'بعد/NN'), ('', 'دخوله/NN'), ('', 'غزة/NNP'), ('', 'للمشاركة/NNP'), ('', 'بالقتال/NNP')…	['Conflicting Emotions Detected']	قتل قوا احتلال واسط مسير يوم اثن اسراييل ظنا انه لسط عود سياج امن دخول غز مشارك قتال اشار صحيف هارتس اسراييل مسير اطلق نار اسراييل تكشف هو ظنا انه لسط يواصل احتلال عدوا قطاع غز يوم قصف جو مدفع مكثف لعد مناطق قطاع ارد تلفز اردن غز		Politics		Israeli-Palestinian Conflict		Real
مخاوف فقدان القيمة الشرائية للسيارات التي تعمل على وقود البنزين والهجينة تقرير منصور العبادي الأردن	Economy	Car	Real		Economy	Car	Real	مخاوف فقدان القيمة الشرائية للسيارات التي تعمل على وقود البنزين والهجينة تقرير منصور العبادي الأردن	[('', 'مخاوف/NN'), ('', 'فقدان/NN'), ('', 'القيمة/DTNN'), ('', 'الشرائية/DTJJ'), ('', 'للسيارات/NNS'), ('', 'التي/WP'), ('', 'تعمل/VBP'), ('', 'على/IN'), ('', 'وقود/NN'), ('', 'البنزين/DTNN'), ('', 'والهجينة/NN'), ('', 'تقرير/NN'), ('', 'منصور/NNP'), ('', 'العبادي/DTNNP'), ('', 'الأردن/DTJJ'), ('', 'التلفزيون/DTNN'), ('', 'الأردني/DTJJ')]	['Conflicting Emotions Detected']	مخاوف قدا قيم شراء سيار تعمل قود بنز هجين تقرير منصور عباد ارد تلفز اردن		Economy		Car		Real
كمية الأمطار الغزيرة تزيد مخزونات المياه وتبشر بموسم زراعي جيد تقرير محمد القضاة الأردن عجلون	Environment	Water Management	Real		Environment	Water Management	Real	كمية الأمطار الغزيرة تزيد مخزونات المياه وتبشر بموسم زراعي جيد تقرير محمد القضاة الأردن عجلون	[('', 'كمية/NN'), ('', 'الأمطار/DTNN'), ('', 'الغزيرة/DTNN'), ('', 'تزيد/VBP'), ('', 'مخزونات/NNS'), ('', 'المياه/DTNN'), ('', 'وتبشر/NN'), ('', 'بموسم/NN'), ('', 'زراعي/JJ'), ('', 'جيد/JJ'), ('', 'تقرير/NN'), ('', 'محمد/NNP'), ('', 'القضاة/DTNN'), ('', 'الأردن/DTJJ'), ('', 'التلفزيون/DTNN'), ('', 'الأردني/DTJJ'), ('', 'عجلون/NNP')]	['سعادة']	كم امطار غزير تزيد مخزون مياه تبشر موسم زراع جيد تقرير محمد قضا ارد تلفز اردن عجلو		Environment		Water Management		Real
قادة العالم يتوافدون إلى دافوس على وقع حربي غزة و اوكرانيا طوفان الأقصى الأردن	Politics	International Relations	Real		Politics	International Relations	Real	قادة العالم يتوافدون إلى دافوس على وقع حربي غزة و اوكرانيا طوفان الأقصى الأردن	[('', 'قادة/NN'), ('', 'العالم/DTNN'), ('', 'يتوافدون/VBP'), ('', 'إلى/NN'), ('', 'دافوس/NNP'), ('', 'على/IN'), ('', 'وقع/NN'), ('', 'حربي/NNS'), ('', 'غزة/NNP'), ('', 'و/CC'), ('', 'اوكرانيا/NNP'), ('', 'طوفان/NN'), ('', 'الأقصى/DTNN'), ('', 'الأردن/DTJJ'), ('', 'التلفزيون/DTNN'), ('', 'الأردني/DTJJ')]	['No Emotion Detected']	قاد عالم يتوافد دافوس وقع حرب غز اوكران طوفا اقصى ارد تلفز اردن		Politics		International Relations		Real
واشنطن ضرباتنا ضد الحوثي لن تكون الأخيرة ولن نتردد طوفان الأقصى غزة الأردن	Politics	International	Real		Politics	International	Real	واشنطن ضرباتنا ضد الحوثي لن تكون الأخيرة ولن نتردد طوفان الأقصى غزة الأردن	[('', 'واشنطن/NNP'), ('', 'ضرباتنا/VBD'), ('', 'ضد/NN'), ('', 'الحوثي/DTNN'), ('', 'لن/RP'), ('', 'تكون/VBP'), ('', 'الأخيرة/DTNN'), ('', 'ولن/NN'), ('', 'نتردد/VBP'), ('', 'طوفان/NN'), ('', 'الأقصى/DTNN'), ('', 'غزة/NNP'), ('', 'الأردن/DTNNP'), ('', 'التلفزيون/DTNN'), ('', 'الأردني/DTJJ')]	['سعادة']	واشنط ضربا ضد حوث تكو اخير ولن نتردد طوفا اقصى غز ارد تلفز اردن		Politics		International		Real
عرض الفيلم الوثائقي أنا غزة تزامناً مع مرور يوم من العدوان طوفان الأقصى الأردن	Media	Palestine	Real		Media	Palestine	Real	عرض الفيلم الوثائقي أنا غزة تزامناً مع مرور يوم من العدوان طوفان الأقصى الأردن	[('', 'عرض/VBD'), ('', 'الفيلم/DTNN'), ('', 'الوثائقي/DTJJ'), ('', 'أنا/VBD'), ('', 'غزة/NNP'), ('', 'تزامنا/NN'), ('', 'مع/NN'), ('', 'مرور/NN'), ('', 'يوم/NN'), ('', 'من/IN'), ('', 'العدوان/DTNN'), ('', 'طوفان/NN'), ('', 'الأقصى/DTNN'), ('', 'الأردن/DTJJ'), ('', 'التلفزيون/DTNN'), ('', 'الأردني/DTJJ')]	['اشمئزاز']	عرض فيلم وثايق غز تزام مرور يوم عدو طوفا اقصى ارد تلفز اردن		Media		Palestine		Real
جرافات الاحتلال تهدم منزلي أسيرين محررين في قلقيلية نوال حجازي مراسلة الضفة الغربية طوفان الأقصى غزة الأردن	Politics	Israeli-Palestinian Conflict	Real		Politics	Israeli-Palestinian Conflict	Real	جرافات الاحتلال تهدم منزلي أسيرين محررين في قلقيلية نوال حجازي مراسلة الضفة الغربية طوفان الأقصى غزة الأردن	[('', 'جرافات/NNS'), ('', 'الاحتلال/DTNN'), ('', 'تهدم/VBP'), ('', 'منزلي/NNS'), ('', 'أسيرين/NNS'), ('', 'محررين/JJ'), ('', 'في/IN'), ('', 'قلقيلية/NNP'), ('', 'نوال/NNP'), ('', 'حجازي/NNP'), ('', 'مراسلة/NN'), ('', 'التلفزيون/DTNN'), ('', 'الأردني/DTJJ'), ('', 'الضفة/DTNNP'), ('', 'الغربية/DTJJ'), ('', 'طوفان/NN'), ('', 'الأقصى/DTNN'), ('', 'غزة/NNP'), ('', 'الأردن/DTNNP')]	['غضب']	جراف احتلال تهدم منزل اسير محرر قلقيل نوال حجاز مراسل تلفز اردن الضف غرب طوفا اقصى غز ارد		Politics		Israeli-Palestinian Conflict		Real
مندوبا عن الملك رئيس الديوان الملكي يرعى الاحتفال بيوم الشجرة بالقطرانة مندوبا عن جلالة الملك عبدالله الثاني رعى رئيس الديوان الملكي الهاشمي يوسف العيسوي اليوم الاثنين الاحتفال الرسمي بـ يوم الشجرة الذي أقيم في غابة اليوبيل الفضي بلواء القطرانة بمحافظة الكرك الأردن	Society	Local	Real		Society	Local	Real	مندوبا عن الملك رئيس الديوان الملكي يرعى الاحتفال بيوم الشجرة بالقطرانة مندوبا عن جلالة الملك عبدالله الثاني رعى رئيس الديوان الملكي الهاشمي يوسف العيسوي اليوم الاثنين الاحتفال الرسمي بـ يوم الشجرة الذي أقيم في غابة اليوبيل الفضي بلواء القطرانة بمحافظة الكرك الأردن	[('', 'مندوبا/NN'), ('', 'عن/IN'), ('', 'الملك/DTNN'), ('', 'رئيس/NN'), ('', 'الديوان/DTNN'), ('', 'الملكي/DTJJ'), ('', 'يرعى/VBP'), ('', 'الاحتفال/DTNN'), ('', 'بيوم/NN'), ('', 'الشجرة/DTNN'), ('', 'بالقطرانة/NNP'), ('', 'مندوبا/NN'), ('', 'عن/IN'), ('', 'جلالة/NN'), ('', 'الملك/DTNN'), ('', 'عبدالله/NNP'), ('الثاني/ADJ', 'NUM'), ('', 'رعى/VBD'), ('', 'رئيس/NN'), ('', 'الديوان/DTNN'), ('', 'المل…	['غضب']	مندوب ملك رييس ديو ملك يرعى احتفال يوم شجر قطران مندوب جلال ملك عبدالل ثان رعى رييس ديو ملك هاشم يوسف عيسو يوم اثن احتفال رسم ب يوم شجر اقيم غاب يوبيل الفض لواء قطران محافظ كرك ارد تلفز اردن		Society		Local		Real
استشهاد فلسطينيين برصاص الجيش الاسرائيلي في الضفة الغربية تقرير تغريد الصمادي طوفان الأقصى غزة الأردن	Politics	Israeli-Palestinian Conflict	Real		Politics	Israeli-Palestinian Conflict	Real	استشهاد فلسطينيين برصاص الجيش الاسرائيلي في الضفة الغربية تقرير تغريد الصمادي طوفان الأقصى غزة الأردن	[('', 'استشهاد/NN'), ('', 'فلسطينيين/NNS'), ('', 'برصاص/NN'), ('', 'الجيش/DTNN'), ('', 'الاسرائيلي/DTJJ'), ('', 'في/IN'), ('', 'الضفة/DTNNP'), ('', 'الغربية/DTJJ'), ('', 'تقرير/NN'), ('', 'تغريد/NN'), ('', 'الصمادي/DTJJ'), ('', 'طوفان/NN'), ('', 'الأقصى/DTNN'), ('', 'غزة/NNP'), ('', 'الأردن/DTNNP'), ('', 'التلفزيون/DTNN'), ('', 'الأردني/DTJJ')]	['No Emotion Detected']	استشهاد سطين رصاص جيش اسراييل الضف غرب تقرير تغريد صماد طوفا اقصى غز ارد تلفز اردن		Politics		Israeli-Palestinian Conflict		Real
أكثر من يوم من الحرب المدمرة على غزة تقرير شادي الشخانبة طوفان الأقصى الأردن	Politics	Israeli-Palestinian Conflict	Real		Politics	Israeli-Palestinian Conflict	Real	أكثر من يوم من الحرب المدمرة على غزة تقرير شادي الشخانبة طوفان الأقصى الأردن	[('', 'أكثر/VBD'), ('', 'من/IN'), ('', 'يوم/NN'), ('', 'من/IN'), ('', 'الحرب/DTNN'), ('', 'المدمرة/DTJJ'), ('', 'على/IN'), ('', 'غزة/NNP'), ('', 'تقرير/NN'), ('', 'شادي/NNP'), ('', 'الشخانبة/DTNNP'), ('', 'طوفان/NN'), ('', 'الأقصى/DTNN'), ('', 'الأردن/DTJJ'), ('', 'التلفزيون/DTNN'), ('', 'الأردني/DTJJ')]	['No Emotion Detected']	يوم حرب مدمر غز تقرير شاد شخانب طوفا اقصى ارد تلفز اردن		Politics		Israeli-Palestinian Conflict		Real
دولة الكيان الصهيوني خسرت سردية محرقة الهولوكوست د وليد العويمر أستاذ العلوم السياسية طوفان الأقصى غزة الأردن	Politics	Israeli-Palestinian Conflict	Real		Politics	Israeli-Palestinian Conflict	Real	دولة الكيان الصهيوني خسرت سردية محرقة الهولوكوست د وليد العويمر أستاذ العلوم السياسية طوفان الأقصى غزة الأردن	[('', 'دولة/NN'), ('', 'الكيان/DTNN'), ('', 'الصهيوني/DTJJ'), ('', 'خسرت/VBD'), ('', 'سردية/NN'), ('', 'محرقة/NN'), ('', 'الهولوكوست/DTNNP'), ('', 'د/NN'), ('', 'وليد/NNP'), ('', 'العويمر/DTNNP'), ('', 'أستاذ/NN'), ('', 'العلوم/DTNN'), ('', 'السياسية/DTJJ'), ('', 'طوفان/NN'), ('', 'الأقصى/DTNN'), ('', 'غزة/NNP'), ('', 'الأردن/DTNNP'), ('', 'التلفزيون/DTNN'), ('', 'الأردني/DTJJ')]	['Conflicting Emotions Detected']	دول الك صهيون خسر سرد محرق هولوكو ليد عويمر استاذ علوم سياس طوفا اقصى غز ارد تلفز اردن		Politics		Israeli-Palestinian Conflict		Real
عشرات الشهداء والجرحى في المجازر الاسرائيلية المتواصلة على غزة تقرير ضياء الدلقموني طوفان الأقصى الأردن	Politics	Israeli-Palestinian Conflict	Real		Politics	Israeli-Palestinian Conflict	Real	عشرات الشهداء والجرحى في المجازر الاسرائيلية المتواصلة على غزة تقرير ضياء الدلقموني طوفان الأقصى الأردن	[('', 'عشرات/NNS'), ('', 'الشهداء/DTNN'), ('', 'والجرحى/VN'), ('', 'في/IN'), ('', 'المجازر/DTNN'), ('', 'الاسرائيلية/DTJJ'), ('', 'المتواصلة/DTJJ'), ('', 'على/IN'), ('', 'غزة/NNP'), ('', 'تقرير/NN'), ('', 'ضياء/NN'), ('', 'الدلقموني/DTNN'), ('', 'طوفان/NN'), ('', 'الأقصى/DTNN'), ('', 'الأردن/DTJJ'), ('', 'التلفزيون/DTNN'), ('', 'الأردني/DTJJ')]	['حزن']	عشر شهداء جرحى مجازر اسراييل متواصل غز تقرير ضياء دلقمون طوفا اقصى ارد تلفز اردن		Politics		Israeli-Palestinian Conflict		Real
تستكمل اللجنة المالية النيابية اليوم الاثنين مناقشة قانون الموازنة العامة لسنة حيث تناقش موازنة ديوان المحاسبة الأردن	Government	Parliament	Real		Government	Parliament	Real	تستكمل اللجنة المالية النيابية اليوم الاثنين مناقشة قانون الموازنة العامة لسنة حيث تناقش موازنة ديوان المحاسبة الأردن	[('', 'تستكمل/VBP'), ('', 'اللجنة/DTNN'), ('', 'المالية/DTJJ'), ('', 'النيابية/DTJJ'), ('', 'اليوم/DTNN'), ('', 'الاثنين/DTNN'), ('', 'مناقشة/NN'), ('', 'قانون/NN'), ('', 'الموازنة/DTNN'), ('', 'العامة/DTJJ'), ('', 'لسنة/NNP'), ('', 'حيث/WRB'), ('', 'تناقش/VBN'), ('', 'موازنة/NN'), ('', 'ديوان/NN'), ('', 'المحاسبة/DTNN'), ('', 'الأردن/DTJJ'), ('', 'التلفزيون/DTNN'), ('', 'الأردني/DTJJ')]	['No Emotion Detected']	تستكمل لجن مال نياب يوم اثن مناقش قانو موازن عام لسن تناقش موازن ديوا محاسب ارد تلفز اردن		Government		Parliament		Real
تكميلية التوجيهي تعقد امتحانها الأخير اليوم د أحمد المساعفة الناطق الإعلامي باسم وزارة التربية والتعليم الأردن	Education	School	Real		Education	School	Real	تكميلية التوجيهي تعقد امتحانها الأخير اليوم د أحمد المساعفة الناطق الإعلامي باسم وزارة التربية والتعليم الأردن	[('', 'تكميلية/NNP'), ('', 'التوجيهي/DTJJ'), ('', 'تعقد/VBP'), ('', 'امتحانها/NN'), ('', 'الأخير/DTNN'), ('', 'اليوم/DTNN'), ('', 'د/NN'), ('', 'أحمد/NN'), ('', 'المساعفة/DTNN'), ('', 'الناطق/DTJJ'), ('', 'الإعلامي/DTJJ'), ('', 'باسم/NNP'), ('', 'وزارة/NN'), ('', 'التربية/DTNN'), ('', 'والتعليم/NNP'), ('', 'الأردن/DTNNP'), ('', 'التلفزيون/DTNN'), ('', 'الأردني/DTJJ')]	['حب']	تكميل توجيه تعقد امتح اخير يوم احمد مساعف ناطق اعلام اسم زار ترب تعليم ارد تلفز اردن		Education		School		Real
نشرة أخبار منتصف النهار الاثنين	Media	News	Real		Media	News	Real	نشرة أخبار منتصف النهار الاثنين	[('', 'نشرة/NN'), ('', 'أخبار/NN'), ('', 'منتصف/NN'), ('', 'النهار/DTNNP'), ('', 'الاثنين/DTNN'), ('', 'الأردن/DTJJ'), ('', 'التلفزيون/DTNN'), ('', 'الأردني/DTJJ')]	['اشمئزاز']	نشر اخبار منتصف نهار اثن ارد تلفز اردن		Media		News		Real
جرش دعوات لتكثيف الجولات على الغابات لمنع الاعتداءات عليها د فراس الفاعور محافظ جرش الأردن يحدث اليوم	Environment	Local	Real		Environment	Local	Real	جرش دعوات لتكثيف الجولات على الغابات لمنع الاعتداءات عليها د فراس الفاعور محافظ جرش الأردن يحدث اليوم	[('', 'جرش/VBD'), ('', 'دعوات/NNS'), ('', 'لتكثيف/JJ'), ('', 'الجولات/DTNNS'), ('', 'على/IN'), ('', 'الغابات/DTNNS'), ('', 'لمنع/NN'), ('', 'الاعتداءات/DTNNS'), ('', 'عليها/NN'), ('', 'د/NN'), ('', 'فراس/NN'), ('', 'الفاعور/DTNN'), ('', 'محافظ/NN'), ('', 'جرش/NN'), ('', 'الأردن/DTNN'), ('', 'التلفزيون/DTNN'), ('', 'الأردني/DTJJ'), ('', 'يحدث/VBP'), ('', 'اليوم/DTNN')]	['غضب']	جرش دعو تكثيف جول غاب لمنع اعتداء عل راس فاعور محافظ جرش ارد تلفز اردن يحدث يوم		Environment		Local		Real
ربط مباشر سقف جمركي على قيمة الحاويات الواردة والعودة إلى السعر القائم سابقاً العميد جمارك د مفلح أبو عليم مدير جمرك العقبة معن أبو دلو مندوب الأردن يحدث اليوم العقبة	Economy	Financial Policies	Real		Economy	Financial Policies	Real	ربط مباشر سقف جمركي على قيمة الحاويات الواردة والعودة إلى السعر القائم سابقاً العميد جمارك د مفلح أبو عليم مدير جمرك العقبة معن أبو دلو مندوب الأردن يحدث اليوم العقبة	[('', 'ربط/NN'), ('', 'مباشر/JJ'), ('', 'سقف/NN'), ('', 'جمركي/JJ'), ('', 'على/IN'), ('', 'قيمة/NN'), ('', 'الحاويات/DTNNS'), ('', 'الواردة/DTJJ'), ('', 'والعودة/NN'), ('', 'إلى/NN'), ('', 'السعر/DTNN'), ('', 'القائم/DTJJ'), ('', 'سابقا/NN'), ('', 'العميد/DTNN'), ('', 'جمارك/NN'), ('', 'د/NN'), ('', 'مفلح/NNP'), ('', 'أبو/NNP'), ('', 'عليم/NNP'), ('', 'مدير/NN'), ('', 'جمرك/NN'), ('', 'العقبة/DTN…	['Conflicting Emotions Detected']	ربط مباشر سقف جمر قيم حاو وارد عود سعر قايم سابق عميد جمار مفلح عليم مدير جمر عقب معن دلو مندوب تلفز اردن ارد يحدث يوم عقب		Economy		Financial Policies		Real
اعتماد حالات إنسانية للاستفادة من المنح والقروض الجامعية مهند الخطيب مستشار وزير التعليم العالي والبحث العلمي الأردن يحدث اليوم	Education	Administration	Real		Education	Administration	Real	اعتماد حالات إنسانية للاستفادة من المنح والقروض الجامعية مهند الخطيب مستشار وزير التعليم العالي والبحث العلمي الأردن يحدث اليوم	[('', 'اعتماد/NN'), ('', 'حالات/NNS'), ('', 'إنسانية/JJ'), ('', 'للاستفادة/JJ'), ('', 'من/IN'), ('', 'المنح/DTNN'), ('', 'والقروض/DTJJ'), ('', 'الجامعية/DTJJ'), ('', 'مهند/NNP'), ('', 'الخطيب/DTNNP'), ('', 'مستشار/NN'), ('', 'وزير/NN'), ('', 'التعليم/DTNN'), ('', 'العالي/DTJJ'), ('', 'والبحث/NN'), ('', 'العلمي/NNP'), ('', 'الأردن/DTNNP'), ('', 'التلفزيون/DTNN'), ('', 'الأردني/DTJJ'), ('', 'يحدث/V…	['سعادة']	اعتماد حال انسان استفاد منح قروض جامع مهند خطيب مستشار زير تعليم عال بحث علم ارد تلفز اردن يحدث يوم		Education		Administration		Real
غارتان جويتان على مخيم البريج وسط قطاع غزة الأردن	Politics	Israeli-Palestinian Conflict	Real		Politics	Israeli-Palestinian Conflict	Real	غارتان جويتان على مخيم البريج وسط قطاع غزة الأردن	[('', 'غارتان/NNS'), ('', 'جويتان/JJ'), ('', 'على/IN'), ('', 'مخيم/NN'), ('', 'البريج/DTNN'), ('', 'وسط/NN'), ('', 'قطاع/NN'), ('', 'غزة/NNP'), ('', 'الأردن/DTNNP'), ('', 'التلفزيون/DTNN'), ('', 'الأردني/DTJJ')]	['No Emotion Detected']	غارت جويت مخيم بريج وسط قطاع غز ارد تلفز اردن		Politics		Israeli-Palestinian Conflict		Real
انفجارات ضخمة واشتباكات بالأسلحة الرشاشة الثقيلة في مخيم البريج وسط قطاع غزة الأردن غزه	Politics	Israeli-Palestinian Conflict	Real		Politics	Israeli-Palestinian Conflict	Real	انفجارات ضخمة واشتباكات بالأسلحة الرشاشة الثقيلة في مخيم البريج وسط قطاع غزة الأردن غزه	[('', 'انفجارات/NNS'), ('', 'ضخمة/JJ'), ('', 'واشتباكات/NNS'), ('', 'بالأسلحة/JJ'), ('', 'الرشاشة/DTNN'), ('', 'الثقيلة/DTJJ'), ('', 'في/IN'), ('', 'مخيم/NN'), ('', 'البريج/DTNNP'), ('', 'وسط/NN'), ('', 'قطاع/NN'), ('', 'غزة/NNP'), ('', 'الأردن/DTNNP'), ('', 'التلفزيون/DTNN'), ('', 'الأردني/DTJJ'), ('', 'غزه/NNP')]	['حزن']	انفجار ضخم واشتباك اسلح رشاش ثقيل مخيم بريج وسط قطاع غز ارد تلفز اردن غزه		Politics		Israeli-Palestinian Conflict		Real
المتحدث باسم الهلال الأحمر الفلسطيني بغزة تمكنا من إدخال عدد من سيارات الإسعاف إلى غزة وشمالها الوضع كارثي جداً بسبب البرد الشديد وظروف النزوح الأردن غزة	Health	Israeli-Palestinian Conflict	Real		Health	Israeli-Palestinian Conflict	Real	المتحدث باسم الهلال الأحمر الفلسطيني بغزة تمكنا من إدخال عدد من سيارات الإسعاف إلى غزة وشمالها الوضع كارثي جداً بسبب البرد الشديد وظروف النزوح الأردن غزة	[('', 'المتحدث/DTNN'), ('', 'باسم/NNP'), ('', 'الهلال/DTNNP'), ('', 'الأحمر/DTJJ'), ('', 'الفلسطيني/DTJJ'), ('', 'بغزة/NNP'), ('', 'تمكنا/VBD'), ('', 'من/IN'), ('', 'إدخال/NN'), ('', 'عدد/NN'), ('', 'من/IN'), ('', 'سيارات/NNS'), ('', 'الإسعاف/DTNN'), ('', 'إلى/VBD'), ('', 'غزة/NNP'), ('', 'وشمالها/NN'), ('', 'الوضع/DTNN'), ('', 'كارثي/JJ'), ('', 'جدا/NN'), ('', 'بسبب/NN'), ('', 'البرد/DTNN'), (''…	['حزن']	متحدث اسم هلال احمر فلسطين بغز تمك ادخال عدد سيار اسعاف غز شمال وضع كارث جدا سبب برد شديد ظروف نزوح ارد تلفز اردن غز		Health		Israeli-Palestinian Conflict		Real
شهيدا وعشرات المصابين جراء القصف الإسرائيلي على منازل في مدينة غزة فجر اليوم الأردن غزة	Humanitarian	Israeli-Palestinian Conflict	Real		Politics	Israeli-Palestinian Conflict	Real	شهيدا وعشرات المصابين جراء القصف الإسرائيلي على منازل في مدينة غزة فجر اليوم الأردن غزة	[('', 'شهيدا/NN'), ('', 'وعشرات/NNS'), ('', 'المصابين/DTNNS'), ('', 'جراء/NN'), ('', 'القصف/DTNN'), ('', 'الإسرائيلي/DTJJ'), ('', 'على/IN'), ('', 'منازل/NN'), ('', 'في/IN'), ('', 'مدينة/NN'), ('', 'غزة/NNP'), ('', 'فجر/NN'), ('', 'اليوم/DTNN'), ('', 'الأردن/DTNN'), ('', 'التلفزيون/DTNN'), ('', 'الأردني/DTJJ'), ('', 'غزة/NNP')]	['اشمئزاز']	شهيد عشر مصاب جراء قصف اسراييل منازل مدين غز فجر يوم ارد تلفز اردن غز		Humanitarian		Israeli-Palestinian Conflict		Real
المرصد الأورومتوسطي لحقوق الإنسان منع المياه يمثل حكمًا بالإعدام الفعلي ما يشكل جريمة حرب بالإضافة إلى كونه شكلا من أشكال الإبادة الجماعية التي ترتكبها قوات الاحــتـلال على السكان المدنيين في القطاع منذ الــســابع من أكــتـوبــر الأردن غزه	Humanitarian	Israeli-Palestinian Conflict	Real		Humanitarian	Israeli-Palestinian Conflict	Real	المرصد الأورومتوسطي لحقوق الإنسان منع المياه يمثل حكمًا بالإعدام الفعلي ما يشكل جريمة حرب بالإضافة إلى كونه شكلا من أشكال الإبادة الجماعية التي ترتكبها قوات الاحــتـلال على السكان المدنيين في القطاع منذ الــســابع من أكــتـوبــر الأردن غزه	[('', 'المرصد/DTNN'), ('', 'الأورومتوسطي/DTJJ'), ('', 'لحقوق/NN'), ('', 'الإنسان/DTNN'), ('', 'منع/NN'), ('', 'المياه/DTNN'), ('', 'يمثل/VBP'), ('', 'حكما/NN'), ('', 'بالإعدام/NNP'), ('', 'الفعلي/DTJJ'), ('', 'ما/WP'), ('', 'يشكل/VBP'), ('', 'جريمة/NN'), ('', 'حرب/NN'), ('', 'بالإضافة/JJ'), ('', 'إلى/VBD'), ('', 'كونه/NNP'), ('', 'شكلا/NN'), ('', 'من/IN'), ('', 'أشكال/NN'), ('', 'الإبادة/DTNN'), …	['غضب']	مرصد اورومتوسط حقوق انس منع مياه يمثل حكم اعدام فعل يشكل جريم حرب اضاف كون شكل اشكال اباد جماع ترتكب قوا احتلال السك مدن قطاع سابع اكتوبر ارد تلفز اردن غزه		Humanitarian		Israeli-Palestinian Conflict		Real
قصف مدفعي إسرائيلي كثيف على مخيمي البريج والمغازي وسط قطاع غزة الأردن	Politics	Israeli-Palestinian Conflict	Real		Politics	Israeli-Palestinian Conflict	Real	قصف مدفعي إسرائيلي كثيف على مخيمي البريج والمغازي وسط قطاع غزة الأردن	[('', 'قصف/NN'), ('', 'مدفعي/NNS'), ('', 'إسرائيلي/JJ'), ('', 'كثيف/JJ'), ('', 'على/IN'), ('', 'مخيمي/NNS'), ('', 'البريج/DTNN'), ('', 'والمغازي/NNP'), ('', 'وسط/NN'), ('', 'قطاع/NN'), ('', 'غزة/NNP'), ('', 'الأردن/DTNNP'), ('', 'التلفزيون/DTNN'), ('', 'الأردني/DTJJ')]	['No Emotion Detected']	قصف مدفع اسراييل كثيف مخيم بريج مغاز وسط قطاع غز ارد تلفز اردن		Politics		Israeli-Palestinian Conflict		Real
مطبخ يوم جديد الاثنين	Media	Cook	Real		Media	Cook	Real	مطبخ يوم جديد الاثنين	[('', 'مطبخ/NN'), ('', 'يوم/NN'), ('', 'جديد/JJ'), ('', 'الاثنين/DTNN'), ('', 'الأردن/DTJJ'), ('', 'التلفزيون/DTNN'), ('', 'الأردني/DTJJ')]	['No Emotion Detected']	مطبخ يوم جديد اثن ارد تلفز اردن		Media		Cook		Real
احتفالية يوم الشجرة وأهميته م خالد الحنيفات وزير الزراعة الأردن يوم جديد	Society	Local	Real		Society	Local	Real	احتفالية يوم الشجرة وأهميته م خالد الحنيفات وزير الزراعة الأردن يوم جديد	[('', 'احتفالية/NN'), ('', 'يوم/NN'), ('', 'الشجرة/DTNN'), ('', 'وأهميته/NN'), ('', 'م/IN'), ('', 'خالد/NNP'), ('', 'الحنيفات/DTNNS'), ('', 'وزير/NN'), ('', 'الزراعة/DTNN'), ('', 'الأردن/DTJJ'), ('', 'التلفزيون/DTNN'), ('', 'الأردني/DTJJ'), ('', 'يوم/NN'), ('', 'جديد/JJ')]	['Conflicting Emotions Detected']	احتفال يوم شجر اهم خالد حنيف زير زراع ارد تلفز اردن يوم جديد		Society		Local		Real
أجواء باردة وغائمة وهطول زخات خفيفة في مناطق مختلفة حتى المساء أحمد الطيار إدارة الأرصاد الجوية الأردن يوم جديد الطقس	Weather	Forecast	Real		Weather	Forecast	Real	أجواء باردة وغائمة وهطول زخات خفيفة في مناطق مختلفة حتى المساء أحمد الطيار إدارة الأرصاد الجوية الأردن يوم جديد الطقس	[('', 'أجواء/NN'), ('', 'باردة/JJ'), ('', 'وغائمة/NN'), ('', 'وهطول/NN'), ('', 'زخات/NNS'), ('', 'خفيفة/JJ'), ('', 'في/IN'), ('', 'مناطق/NN'), ('', 'مختلفة/JJ'), ('', 'حتى/IN'), ('', 'المساء/DTNN'), ('', 'أحمد/VBD'), ('', 'الطيار/DTNN'), ('', 'إدارة/NN'), ('', 'الأرصاد/DTNN'), ('', 'الجوية/DTJJ'), ('', 'الأردن/DTJJ'), ('', 'التلفزيون/DTNN'), ('', 'الأردني/DTJJ'), ('', 'يوم/NN'), ('', 'جديد/JJ'), …	['حزن']	اجواء ارد غايم هطول زخا خفيف مناطق مختلف مساء احمد طيار ادار ارصاد الجو ارد تلفز اردن يوم جديد طقس		Weather		Forecast		Real
قال مندوب عمليات إدارة السير إن كافة الطرق تشهد نشاطاً ملحوظاً وكثيف وتم توزيع مجموعات السير على كافة المواقع التي تحتاج إلى رقابة مرورية لضمان بيئة مرورية آمنة على مداخل العاصمة ومخارج الأنفاق والجسور وأضاف أن التتابع القريب تسبب بحادث بين أربع مركبات يوم أمس في منطقة الإستقلال على نهاية نفق الدوار الرابع	Traffic	Local	Real		Traffic	Local	Real	قال مندوب عمليات إدارة السير إن كافة الطرق تشهد نشاطاً ملحوظاً وكثيف وتم توزيع مجموعات السير على كافة المواقع التي تحتاج إلى رقابة مرورية لضمان بيئة مرورية آمنة على مداخل العاصمة ومخارج الأنفاق والجسور وأضاف أن التتابع القريب تسبب بحادث بين أربع مركبات يوم أمس في منطقة الإستقلال على نهاية نفق الدوار الرابع	[('', 'قال/VBD'), ('', 'مندوب/NN'), ('', 'عمليات/NNS'), ('', 'إدارة/NN'), ('', 'السير/DTNN'), ('', 'إن/NN'), ('', 'كافة/NN'), ('', 'الطرق/DTNN'), ('', 'تشهد/VBP'), ('', 'نشاطا/NN'), ('', 'ملحوظا/JJ'), ('', 'وكثيف/NN'), ('', 'وتم/NN'), ('', 'توزيع/NN'), ('', 'مجموعات/NNS'), ('', 'السير/DTNN'), ('', 'على/IN'), ('', 'كافة/NN'), ('', 'المواقع/DTNN'), ('', 'التي/WP'), ('', 'تحتاج/VBP'), ('', 'إلى/NN')…	['Conflicting Emotions Detected']	قال مندوب عمل ادار سير كاف طرق تشهد نشاط ملحوظ كثيف وتم توزيع مجموع سير كاف مواقع تحتاج رقاب مرور لضما بيء مرور امن مداخل عاصم مخارج انفاق جسور اضاف تتابع قريب تسبب حادث مركب يوم منطق استقلال نها نفق دوار رابع		Traffic		Local		Real
يختتم طلبة الثانوية العامة المشتركين في الدورة التكميلية للعام الدراسي الاثنين جلساتهم الامتحانية بتقدم مشتركا ومشتركة بالفرع العلمي لمبحث الكيمياء وقال الناطق الاعلامي باسم وزارة التربية والتعليم الدكتور احمد المساعفة إن جميع الجلسات الامتحانية للدورة التكميلية سارت وفق المخطط له وان جميع بيانات التغذية الراجعة من الطلبة وأولياء أمورهم حول آلية سير الامتحانات كانت إيجابية الأمر الذي اكدته اللجان…	Education	School	Real		Education	School	Real	يختتم طلبة الثانوية العامة المشتركين في الدورة التكميلية للعام الدراسي الاثنين جلساتهم الامتحانية بتقدم مشتركا ومشتركة بالفرع العلمي لمبحث الكيمياء وقال الناطق الاعلامي باسم وزارة التربية والتعليم الدكتور احمد المساعفة إن جميع الجلسات الامتحانية للدورة التكميلية سارت وفق المخطط له وان جميع بيانات التغذية الراجعة من الطلبة وأولياء أمورهم حول آلية سير الامتحانات كانت إيجابية الأمر الذي اكدته اللجان…	[('', 'يختتم/VBP'), ('', 'طلبة/NN'), ('', 'الثانوية/DTNN'), ('', 'العامة/DTJJ'), ('', 'المشتركين/DTNNS'), ('', 'في/IN'), ('', 'الدورة/DTNN'), ('', 'التكميلية/DTJJ'), ('', 'للعام/NNP'), ('', 'الدراسي/DTJJ'), ('', 'الاثنين/DTNN'), ('', 'جلساتهم/NN'), ('', 'الامتحانية/DTNN'), ('', 'بتقدم/NN'), ('', 'مشتركا/JJ'), ('', 'ومشتركة/NN'), ('', 'بالفرع/NNP'), ('', 'العلمي/DTJJ'), ('', 'لمبحث/NN'), ('', 'الك…	['Conflicting Emotions Detected']	يختتم طلب ثانو عام مشترك دور تكميل عام دراس اثن جلسا امتحان تقدم مشتر مشترك فرع علم مبحث كيمياء قال ناطق اعلام اسم زار ترب تعليم دكتور احمد مساعف جلس امتحان دور تكميل سار وفق مخطط وان يان تغذ راجع طلب اولياء امور حول ال سير امتحان كان ايجاب امر اكد اللج الفن مشرف متابع امتح عقب جلس امتحان ارد تلفز اردن		Education		School		Real
تكون الأجواء اليوم الاثنين باردة في اغلب المناطق وغائمة جزئياً الى غائمة خاصة في شمال ووسط المملكة فيما تكون الاجواء لطيفة الحرارة في الاغوار والبحر الميت والعقبة ويتوقع هطول زخات خفيفة من المطر في شمال المملكة واجزاء من المناطق الوسطى الغربية ومع ساعات المساء تتناقص كميات الغيوم تدريجياً وتضعف فرص الهطول وتكون الرياح غربية معتدلة السرعة وتحذر إدارة الأرصاد الجوية في تقريرها من خطر تدني مدى الرؤي…	Weather	Forecast	Real		Weather	Forecast	Real	تكون الأجواء اليوم الاثنين باردة في اغلب المناطق وغائمة جزئياً الى غائمة خاصة في شمال ووسط المملكة فيما تكون الاجواء لطيفة الحرارة في الاغوار والبحر الميت والعقبة ويتوقع هطول زخات خفيفة من المطر في شمال المملكة واجزاء من المناطق الوسطى الغربية ومع ساعات المساء تتناقص كميات الغيوم تدريجياً وتضعف فرص الهطول وتكون الرياح غربية معتدلة السرعة وتحذر إدارة الأرصاد الجوية في تقريرها من خطر تدني مدى الرؤي…	[('', 'تكون/VBP'), ('', 'الأجواء/DTNN'), ('', 'اليوم/DTNN'), ('', 'الاثنين/DTNN'), ('', 'باردة/JJ'), ('', 'في/IN'), ('اغلب/NOUN', 'QUANT'), ('', 'المناطق/DTNN'), ('', 'وغائمة/NN'), ('', 'جزئيا/JJ'), ('', 'الى/IN'), ('', 'غائمة/NN'), ('', 'خاصة/JJ'), ('', 'في/IN'), ('', 'شمال/NN'), ('', 'ووسط/NN'), ('', 'المملكة/DTNN'), ('', 'فيما/IN'), ('', 'تكون/VBP'), ('', 'الاجواء/DTNN'), ('', 'لطيفة/NN'), (''…	['Conflicting Emotions Detected']	تكو اجواء يوم اثن ارد اغلب مناطق غايم جزء الى غايم وسط مملك تكو اجواء لطيف حرار اغوار بحر الم عقب يتوقع هطول زخا خفيف مطر مملك واجزاء مناطق وسطى غرب ومع ساع مساء تتناقص كم غيوم تدريج تضعف فرص هطول تكو رياح غرب معتدل سرع تحذر ادار ارصاد الجو تقرير خطر تدن مدى الرء افق سبب ضباب مرتفع جبل بعض مناطق باد سهول خطر انزلاق طرق مناطق تشهد هطول مطر حسب تقرير يطرء يوم غد ثلاثاء ارتفاع قليل درج حرار تكو اجوا…		Weather		Forecast		Real
الغذاء والدواء تبحث سيل تعزيز الأمن الغذائي في محافظة معان	Government	Food	Real		Government	Food	Real	الغذاء والدواء تبحث سيل تعزيز الأمن الغذائي في محافظة معان	[('', 'الغذاء/DTNN'), ('', 'والدواء/NN'), ('', 'تبحث/VBP'), ('', 'سيل/NN'), ('', 'تعزيز/NN'), ('', 'الأمن/DTNN'), ('', 'الغذائي/DTJJ'), ('', 'في/IN'), ('', 'محافظة/NN'), ('', 'معان/NNP')]	['حزن']	غذاء دواء تبحث سيل تعزيز امن غذاء محافظ معا		Government		Food		Real
نــشـرة أخـبـار الحادية عـشـرة الأحـــد	Media	News	Real		Media	News	Real	نــشـرة أخـبـار الحادية عـشـرة الأحـــد	[('', 'نــشـرة/NNP'), ('', 'أخـبـار/NNP'), ('', 'الحادية/DTJJ'), ('', 'عـشـرة/NN'), ('', 'الأحـــد/DTNN'), ('', 'التلفزيون/DTNN'), ('', 'الأردني/DTJJ')]	['No Emotion Detected']	نشر اخبار حاد عشر احد تلفز اردن		Media		News		Real
حماده فراعنة لـ برنامج مسارات إذا نجح سيناريو التهجير من قطاع غزة سينتقل هذا السيناريو الى الضفة الغربية والقدس مما يولد قلق لدى الأردن غزة	Government	International	Real		Government	International	Real	حماده فراعنة لـ برنامج مسارات إذا نجح سيناريو التهجير من قطاع غزة سينتقل هذا السيناريو الى الضفة الغربية والقدس مما يولد قلق لدى الأردن غزة	[('', 'حماده/NNP'), ('', 'فراعنة/NNP'), ('', 'لـ/NNP'), ('', 'برنامج/NN'), ('', 'مسارات/NNS'), ('', 'إذا/NN'), ('', 'نجح/VBD'), ('', 'سيناريو/NN'), ('', 'التهجير/DTNN'), ('', 'من/IN'), ('', 'قطاع/NN'), ('', 'غزة/NNP'), ('', 'سينتقل/NNP'), ('', 'هذا/DT'), ('', 'السيناريو/DTNN'), ('', 'الى/IN'), ('', 'الضفة/DTNNP'), ('', 'الغربية/DTJJ'), ('', 'والقدس/NNP'), ('', 'مما/NN'), ('', 'يولد/VBP'), ('', 'ق…	['غضب']	حماد راعن ل رنامج مسار نجح سينار تهجير قطاع غز سينتقل سيناريو الى الضف غرب قدس يولد قلق ارد تلفز اردن غز		Government		International		Real
د حسن الدعجة لـ برنامج مسارات إن لم تفعل حماس ذلك الأن متى ستفعل هل المطلوب من الشعب الفلسطيني أن يلتزم الصمت ويصبر غزة	Politics	Israeli-Palestinian Conflict	Real		Politics	Israeli-Palestinian Conflict	Real	د حسن الدعجة لـ برنامج مسارات إن لم تفعل حماس ذلك الأن متى ستفعل هل المطلوب من الشعب الفلسطيني أن يلتزم الصمت ويصبر غزة	[('', 'د/NN'), ('', 'حسن/NN'), ('', 'الدعجة/DTNN'), ('', 'لـ/NN'), ('', 'برنامج/NN'), ('', 'مسارات/NNS'), ('', 'إن/NN'), ('', 'لم/RP'), ('', 'تفعل/VBP'), ('', 'حماس/NNP'), ('', 'ذلك/DT'), ('', 'الأن/DTNN'), ('', 'متى/WRB'), ('', 'ستفعل/VBN'), ('', 'هل/RP'), ('', 'المطلوب/DTJJ'), ('', 'من/IN'), ('', 'الشعب/DTNN'), ('', 'الفلسطيني/DTJJ'), ('', 'أن/VBD'), ('', 'يلتزم/VBP'), ('', 'الصمت/DTNN'), ('', …	['No Emotion Detected']	حسن دعج ل رنامج مسار تفعل حماس الان ستفعل مطلوب شعب فلسطين يلتزم الص يصبر تلفز اردن غز		Politics		Israeli-Palestinian Conflict		Real
الناطق باسم كتائب القسام استهدفنا وأخرجنا آلية عسكرية إسرائيلية خلال يوم في غزة أي حديث سوى وقف العدوان على شعبنا ليست له أي قيمة من واجبنا أن نحيط ملياري مسلم في العالم بأن العدو الصهيوني دمر معظم مساجد قطاع غزة على الأغلب العديد من الأسرى قد قتلوا والعدو يتحمل مسؤولية مصيرهم غزة	Politics	Israeli-Palestinian Conflict	Real		Politics	Israeli-Palestinian Conflict	Real	الناطق باسم كتائب القسام استهدفنا وأخرجنا آلية عسكرية إسرائيلية خلال يوم في غزة أي حديث سوى وقف العدوان على شعبنا ليست له أي قيمة من واجبنا أن نحيط ملياري مسلم في العالم بأن العدو الصهيوني دمر معظم مساجد قطاع غزة على الأغلب العديد من الأسرى قد قتلوا والعدو يتحمل مسؤولية مصيرهم غزة	[('', 'الناطق/DTNN'), ('', 'باسم/NNP'), ('', 'كتائب/NN'), ('', 'القسام/DTNNP'), ('', 'استهدفنا/VBD'), ('', 'وأخرجنا/NN'), ('', 'آلية/NN'), ('', 'عسكرية/JJ'), ('', 'إسرائيلية/JJ'), ('', 'خلال/NN'), ('', 'يوم/NN'), ('', 'في/IN'), ('', 'غزة/NNP'), ('', 'أي/NNP'), ('', 'حديث/NN'), ('', 'سوى/NN'), ('', 'وقف/NN'), ('', 'العدوان/DTNN'), ('', 'على/IN'), ('', 'شعبنا/NN'), ('', 'ليست/VBD'), ('', 'له/NN'), …	['حزن']	ناطق اسم تايب قسام استهدف اخرج ال عسكر اسراييل خلال يوم غز حديث وقف عدو شعب قيم واجب نحيط مليار مسلم عالم بان عدو صهيون دمر معظم مساجد قطاع غز اغلب عديد اسرى قتلو والعد يتحمل مسوول مصير تلفز اردن غز		Politics		Israeli-Palestinian Conflict		Real
وصول طائرة مساعدات باكستانية إلى مطار ماركا العسكري باكستان غزة	Humanitarian	Aid	Real		Humanitarian	Aid	Real	وصول طائرة مساعدات باكستانية إلى مطار ماركا العسكري باكستان غزة	[('', 'وصول/NN'), ('', 'طائرة/NN'), ('', 'مساعدات/NNS'), ('', 'باكستانية/JJ'), ('', 'إلى/VBD'), ('', 'مطار/NN'), ('', 'ماركا/NNP'), ('', 'العسكري/DTJJ'), ('', 'التلفزيون/DTNN'), ('', 'الأردني/DTJJ'), ('', 'الأردن/DTJJ'), ('', 'باكستان/NNP'), ('', 'غزة/NNP')]	['No Emotion Detected']	صول طاير مساعد اكستان مطار مار عسكر تلفز اردن ارد اكست غز		Humanitarian		Aid		Real
برنامج مسارات يوم من العدوان ماذا بعد ضيوف الحلقة الكاتب والمحلل السياسي حماده فراعنة الدكتور حسن الدعجة استاذ العلوم السياسية غزة غزة الآن	Media	Analysis	Real		Media	Analysis	Real	برنامج مسارات يوم من العدوان ماذا بعد ضيوف الحلقة الكاتب والمحلل السياسي حماده فراعنة الدكتور حسن الدعجة استاذ العلوم السياسية غزة غزة الآن	[('', 'برنامج/NN'), ('', 'مسارات/NNS'), ('', 'يوم/NN'), ('', 'من/IN'), ('', 'العدوان/DTNN'), ('', 'ماذا/WP'), ('', 'بعد/NN'), ('', 'ضيوف/NN'), ('', 'الحلقة/DTNN'), ('', 'الكاتب/DTNN'), ('', 'والمحلل/NNP'), ('', 'السياسي/DTJJ'), ('', 'حماده/NNP'), ('', 'فراعنة/NNP'), ('', 'الدكتور/DTNN'), ('', 'حسن/NNP'), ('', 'الدعجة/DTNNP'), ('', 'استاذ/NN'), ('', 'العلوم/DTNN'), ('', 'السياسية/DTJJ'), ('', 'الت…	['حزن']	رنامج مسار يوم عدو ضيوف حلق كاتب محلل سياس حماد راعن دكتور حسن دعج استاذ علوم سياس تلفز اردن غز غز		Media		Analysis		Real
ألــو دكــتور مشاكل وإلتهابات المسالك البولية عند الأطفال وعلاجها	Health	Medical Services	Real		Health	Medical Services	Real	ألــو دكــتور مشاكل وإلتهابات المسالك البولية عند الأطفال وعلاجها	[('', 'ألــو/NNP'), ('', 'دكــتور/NNP'), ('', 'مشاكل/NN'), ('', 'وإلتهابات/NNS'), ('', 'المسالك/DTNN'), ('', 'البولية/DTJJ'), ('', 'عند/NN'), ('', 'الأطفال/DTNN'), ('', 'وعلاجها/NN'), ('', 'التلفزيون/DTNN'), ('', 'الأردني/DTJJ')]	['No Emotion Detected']	الو دكتور مشاكل التهاب مسالك بول اطفال علاج تلفز اردن		Health		Medical Services		Real
المستقلة للانتخاب حزباً و ألف منتسب و من عدد المنتسبين من النساء تقرير سامي الحربي الأردن	Government	Parliament	Real		Government	Parliament	Real	المستقلة للانتخاب حزباً و ألف منتسب و من عدد المنتسبين من النساء تقرير سامي الحربي الأردن	[('', 'المستقلة/DTJJ'), ('', 'للانتخاب/NN'), ('', 'حزبا/NN'), ('', 'و/CC'), ('', 'ألف/NN'), ('', 'منتسب/JJ'), ('', 'و/CC'), ('', 'من/IN'), ('', 'عدد/NN'), ('', 'المنتسبين/DTJJ'), ('', 'من/IN'), ('', 'النساء/DTNN'), ('', 'تقرير/NN'), ('', 'سامي/NNP'), ('', 'الحربي/DTJJ'), ('', 'الأردن/DTJJ'), ('', 'التلفزيون/DTNN'), ('', 'الأردني/DTJJ')]	['غضب']	مستقل انتخاب حزب منتسب عدد منتسب نساء تقرير سام حرب ارد تلفز اردن		Government		Parliament		Real
تقديم رعد البطوش	Media	General	Real		Media	General	Real	تقديم رعد البطوش	[('', 'تقديم/NN'), ('', 'رعد/NNP'), ('', 'البطوش/DTNNP'), ('', 'التلفزيون/DTNN'), ('', 'الأردني/DTJJ')]	['No Emotion Detected']	تقديم رعد بطوش تلفز اردن		Media		General		Real
جلسة حوارية بعنوان بوصلتنا فلسطين وتاجها القدس تقرير أحمد القريوتي طوفان الأقصى غزة الأردن	Society	Local	Real		Media	Palestine	Real	جلسة حوارية بعنوان بوصلتنا فلسطين وتاجها القدس تقرير أحمد القريوتي طوفان الأقصى غزة الأردن	[('', 'جلسة/NN'), ('', 'حوارية/NN'), ('', 'بعنوان/NNP'), ('', 'بوصلتنا/NNP'), ('', 'فلسطين/NNP'), ('', 'وتاجها/NN'), ('', 'القدس/DTNNP'), ('', 'تقرير/NN'), ('', 'أحمد/NN'), ('', 'القريوتي/DTNNP'), ('', 'طوفان/NN'), ('', 'الأقصى/DTNN'), ('', 'غزة/NNP'), ('', 'الأردن/DTNNP'), ('', 'التلفزيون/DTNN'), ('', 'الأردني/DTJJ')]	['No Emotion Detected']	جلس حوار عنو وصل لسط تاج قدس تقرير احمد قريوت طوفا اقصى غز ارد تلفز اردن		Society		Local		Real
مدير يزور إدارة التنفيذ القضائي ويشيد بالجهود المبذولة لمساندة المنظومة القضائية الأردن	Military	Local	Real		Military	Local	Real	مدير يزور إدارة التنفيذ القضائي ويشيد بالجهود المبذولة لمساندة المنظومة القضائية الأردن	[('', 'مدير/NN'), ('', 'الأمن/DTNN'), ('', 'العام/DTJJ'), ('', 'يزور/VBP'), ('', 'إدارة/NN'), ('', 'التنفيذ/DTNN'), ('', 'القضائي/DTJJ'), ('', 'ويشيد/NNP'), ('', 'بالجهود/NNP'), ('', 'المبذولة/DTJJ'), ('', 'لمساندة/NN'), ('', 'المنظومة/DTNN'), ('', 'القضائية/DTJJ'), ('', 'الأردن/DTNN'), ('', 'التلفزيون/DTNN'), ('', 'الأردني/DTJJ')]	['سعادة']	مدير امن عام يزور ادار تنفيذ قضاء يشيد جهود مبذول مساند منظوم قضاء ارد تلفز اردن		Military		Local		Real
الصفدي والسفير البريطاني جلالة الملك صوت حكمة ويجب إسناد جهوده لتحقيق حل الدولتين طوفان الأقصى غزة الأردن	Government	Diplomacy Relations	Real		Government	Diplomacy Relations	Real	الصفدي والسفير البريطاني جلالة الملك صوت حكمة ويجب إسناد جهوده لتحقيق حل الدولتين طوفان الأقصى غزة الأردن	[('', 'الصفدي/DTNNP'), ('', 'والسفير/NN'), ('', 'البريطاني/DTNN'), ('', 'جلالة/NN'), ('', 'الملك/DTNN'), ('', 'صوت/NN'), ('', 'حكمة/NN'), ('', 'ويجب/NNP'), ('', 'إسناد/NNP'), ('', 'جهوده/NNP'), ('', 'لتحقيق/NNP'), ('', 'حل/NN'), ('', 'الدولتين/DTNNS'), ('', 'طوفان/NN'), ('', 'الأقصى/DTNN'), ('', 'غزة/NNP'), ('', 'الأردن/DTNNP'), ('', 'التلفزيون/DTNN'), ('', 'الأردني/DTJJ')]	['حب']	صفد سفير بريطان جلال ملك صوت حكم يجب اسناد جهود تحقيق حل دولت طوفا اقصى غز ارد تلفز اردن		Government		Diplomacy Relations		Real
نـشـــرة الأخــبـار المــحـليـة الأحــد	Media	News	Real		Media	News	Real	نـشـــرة الأخــبـار المــحـليـة الأحــد	[('', 'نـشـــرة/NN'), ('', 'الأخــبـار/DTNN'), ('', 'المــحـليـة/DTJJ'), ('', 'الأحــد/DTNN'), ('', 'التلفزيون/DTNN'), ('', 'الأردني/DTJJ')]	['No Emotion Detected']	نشر اخبار محل احد تلفز اردن		Media		News		Real
وصول شهداء وجرحى إلى مستشفى كمال عدوان في بيت لاهيا بعد قصف الاحتلال مواطنين في بيت حانون الأردن غزة	Health	Israeli-Palestinian Conflict	Real		Health	Israeli-Palestinian Conflict	Real	وصول شهداء وجرحى إلى مستشفى كمال عدوان في بيت لاهيا بعد قصف الاحتلال مواطنين في بيت حانون الأردن غزة	[('', 'وصول/NN'), ('', 'شهداء/NN'), ('', 'وجرحى/VBN'), ('', 'إلى/NN'), ('', 'مستشفى/NN'), ('', 'كمال/NNP'), ('', 'عدوان/NN'), ('', 'في/IN'), ('', 'بيت/NNP'), ('', 'لاهيا/NNP'), ('', 'بعد/NN'), ('', 'قصف/NN'), ('', 'الاحتلال/DTNN'), ('', 'مواطنين/NNS'), ('', 'في/IN'), ('', 'بيت/NN'), ('', 'حانون/JJ'), ('', 'الأردن/DTNN'), ('', 'التلفزيون/DTNN'), ('', 'الأردني/DTJJ'), ('', 'غزة/NNP')]	['حزن']	صول شهداء جرحى مستشفى كمال عدوا بيت لاه قصف احتلال مواطن بيت حانو ارد تلفز اردن غز		Health		Israeli-Palestinian Conflict		Real
طائرة مساعدات إنسانية وإغاثية باكستانية تصل إلى مطار ماركا العسكري تمهيدا لإرسالها إلى الأشقاء في غزة	Humanitarian	Aid	Real		Humanitarian	Aid	Real	طائرة مساعدات إنسانية وإغاثية باكستانية تصل إلى مطار ماركا العسكري تمهيدا لإرسالها إلى الأشقاء في غزة	[('', 'طائرة/NN'), ('', 'مساعدات/NNS'), ('', 'إنسانية/JJ'), ('', 'وإغاثية/JJ'), ('', 'باكستانية/JJ'), ('', 'تصل/VBP'), ('', 'إلى/NN'), ('', 'مطار/NN'), ('', 'ماركا/NNP'), ('', 'العسكري/DTJJ'), ('', 'تمهيدا/NN'), ('', 'لإرسالها/NN'), ('', 'إلى/VBD'), ('', 'الأشقاء/DTNN'), ('', 'في/IN'), ('', 'غزة/NNP'), ('', 'التلفزيون/DTNN'), ('', 'الأردني/DTJJ')]	['No Emotion Detected']	طاير مساعد انسان اغاث اكستان تصل مطار مار عسكر تمهيد ارسال اشقاء غز تلفز اردن		Humanitarian		Aid		Real
الصفدي والسفير البريطاني جلالة الملك صوت حكمة ويجب إسناد جهوده لتحقيق حل الدولتين مجلس النواب	Government	Diplomacy Relations	Real		Government	Diplomacy Relations	Real	الصفدي والسفير البريطاني جلالة الملك صوت حكمة ويجب إسناد جهوده لتحقيق حل الدولتين مجلس النواب	[('', 'الصفدي/DTNNP'), ('', 'والسفير/NN'), ('', 'البريطاني/DTNN'), ('', 'جلالة/NN'), ('', 'الملك/DTNN'), ('', 'صوت/NN'), ('', 'حكمة/NN'), ('', 'ويجب/NNP'), ('', 'إسناد/NNP'), ('', 'جهوده/NNP'), ('', 'لتحقيق/NNP'), ('', 'حل/VBD'), ('', 'الدولتين/DTNNS'), ('', 'التلفزيون/DTNN'), ('', 'الأردني/DTJJ'), ('', 'مجلس/NN'), ('', 'النواب/DTNN')]	['حب']	صفد سفير بريطان جلال ملك صوت حكم يجب اسناد جهود تحقيق حل دولت تلفز اردن مجلس نواب		Government		Diplomacy Relations		Real
ورشة عمل حول سلامة الغذاء في الفنادق والمطاعم السياحية الأردن البترا	Tourism	Local	Real		Tourism	Local	Real	ورشة عمل حول سلامة الغذاء في الفنادق والمطاعم السياحية الأردن البترا	[('', 'ورشة/NN'), ('', 'عمل/NN'), ('', 'حول/NN'), ('', 'سلامة/NN'), ('', 'الغذاء/DTNN'), ('', 'في/IN'), ('', 'الفنادق/DTNN'), ('', 'والمطاعم/NNP'), ('', 'السياحية/DTJJ'), ('', 'الأردن/DTJJ'), ('', 'التلفزيون/DTNN'), ('', 'الأردني/DTJJ'), ('', 'البترا/DTJJ')]	['حزن']	ورش عمل حول سلام غذاء فنادق مطاعم سياح ارد تلفز اردن البت		Tourism		Local		Real
رئيس الوزراء الدكتور بشر الخصاونة يوجِّه الوزارات والجهات المعنيَّة إلى اتِّخاذ التَّدابير والإجراءات اللازمة للتَّعامل مع الآثار التضخُّميَّة المحتملة بسبب الأوضاع القائمة في البحر الأحمر	Government	Local	Real		Government	Local	Real	رئيس الوزراء الدكتور بشر الخصاونة يوجِّه الوزارات والجهات المعنيَّة إلى اتِّخاذ التَّدابير والإجراءات اللازمة للتَّعامل مع الآثار التضخُّميَّة المحتملة بسبب الأوضاع القائمة في البحر الأحمر	[('', 'رئيس/NN'), ('', 'الوزراء/DTNN'), ('', 'الدكتور/DTNN'), ('', 'بشر/VBD'), ('', 'الخصاونة/DTNN'), ('', 'يوجه/VBP'), ('', 'الوزارات/DTNNS'), ('', 'والجهات/NN'), ('', 'المعنية/DTNN'), ('', 'إلى/VBD'), ('', 'اتخاذ/NN'), ('', 'التدابير/DTNN'), ('', 'والإجراءات/NNS'), ('', 'اللازمة/VN'), ('', 'للتعامل/NN'), ('', 'مع/NN'), ('', 'الآثار/DTNN'), ('', 'التضخمية/DTJJ'), ('', 'المحتملة/DTJJ'), ('', 'بسب…	['اشمئزاز']	رييس وزراء دكتور بشر خصاون يوج وزار والجه معن اتخاذ تدابير اجراء لازم تعامل اثار تضخم محتمل سبب اوضاع قايم بحر احمر تلفز اردن		Government		Local		Real
شهيدا في قصف إسرائيلي متواصل على خان يونس جنوبي قطاع غزة منذ فجر اليوم الأردن غزة	Politics	Israeli-Palestinian Conflict	Real		Politics	Israeli-Palestinian Conflict	Real	شهيدا في قصف إسرائيلي متواصل على خان يونس جنوبي قطاع غزة منذ فجر اليوم الأردن غزة	[('', 'شهيدا/NN'), ('', 'في/IN'), ('', 'قصف/NN'), ('', 'إسرائيلي/JJ'), ('', 'متواصل/JJ'), ('', 'على/IN'), ('', 'خان/NN'), ('', 'يونس/NNP'), ('', 'جنوبي/NN'), ('', 'قطاع/NN'), ('', 'غزة/NNP'), ('', 'منذ/IN'), ('', 'فجر/NN'), ('', 'اليوم/DTNN'), ('', 'الأردن/DTNN'), ('', 'التلفزيون/DTNN'), ('', 'الأردني/DTJJ'), ('', 'غزة/NNP')]	['No Emotion Detected']	شهيد قصف اسراييل متواصل خان يونس جنوب قطاع غز فجر يوم ارد تلفز اردن غز		Politics		Israeli-Palestinian Conflict		Real
مبادرة وطنية بعنوان تحصين الجبهة الداخلية وتعزيز الصمود في فلسطين تقرير رعد عوجان طوفان الأقصى غزة الأردن معان	Society	Local	Real		Society	Local	Real	مبادرة وطنية بعنوان تحصين الجبهة الداخلية وتعزيز الصمود في فلسطين تقرير رعد عوجان طوفان الأقصى غزة الأردن معان	[('', 'مبادرة/NN'), ('', 'وطنية/JJ'), ('', 'بعنوان/NNP'), ('', 'تحصين/NN'), ('', 'الجبهة/DTNN'), ('', 'الداخلية/DTJJ'), ('', 'وتعزيز/NN'), ('', 'الصمود/DTNN'), ('', 'في/IN'), ('', 'فلسطين/NNP'), ('', 'تقرير/NN'), ('', 'رعد/NNP'), ('', 'عوجان/NNP'), ('', 'طوفان/NN'), ('', 'الأقصى/DTNN'), ('', 'غزة/NNP'), ('', 'الأردن/DTNNP'), ('', 'التلفزيون/DTNN'), ('', 'الأردني/DTJJ'), ('', 'معان/NNP')]	['حزن']	مبادر وطن عنو تحص جبه داخل تعزيز صمود لسط تقرير رعد عوجا طوفا اقصى غز ارد تلفز اردن معا		Society		Local		Real
لم تحقق دولة الكيان أياً من أهدافها منذ بدء الحرب البرية د عبد الحكيم القرالة أستاذ العلوم السياسية طوفان الأقصى غزة الأردن	Politics	Israeli-Palestinian Conflict	Real		Politics	Israeli-Palestinian Conflict	Real	لم تحقق دولة الكيان أياً من أهدافها منذ بدء الحرب البرية د عبد الحكيم القرالة أستاذ العلوم السياسية طوفان الأقصى غزة الأردن	[('', 'لم/RP'), ('', 'تحقق/VBP'), ('', 'دولة/NN'), ('', 'الكيان/DTNN'), ('', 'أيا/NN'), ('', 'من/IN'), ('', 'أهدافها/NN'), ('', 'منذ/IN'), ('', 'بدء/NN'), ('', 'الحرب/DTNN'), ('', 'البرية/DTJJ'), ('', 'د/NN'), ('', 'عبد/NNP'), ('', 'الحكيم/DTNNP'), ('', 'القرالة/DTNNP'), ('', 'أستاذ/NN'), ('', 'العلوم/DTNN'), ('', 'السياسية/DTJJ'), ('', 'طوفان/NN'), ('', 'الأقصى/DTNN'), ('', 'غزة/NNP'), ('', 'الأ…	['حزن']	تحقق دول الك ايا اهداف بدء حرب البر عبد حكيم قرال استاذ علوم سياس طوفا اقصى غز ارد تلفز اردن		Politics		Israeli-Palestinian Conflict		Real
ميجا واط الحمل الكهربائي المسجل أمس السبت الأردن	Economy	Energy	Real		Economy	Energy	Real	ميجا واط الحمل الكهربائي المسجل أمس السبت الأردن	[('', 'ميجا/NN'), ('', 'واط/NN'), ('', 'الحمل/DTNN'), ('', 'الكهربائي/DTJJ'), ('', 'المسجل/DTJJ'), ('', 'أمس/VBD'), ('', 'السبت/DTNN'), ('', 'الأردن/DTJJ'), ('', 'التلفزيون/DTNN'), ('', 'الأردني/DTJJ')]	['No Emotion Detected']	ميج واط حمل كهرباء مسجل الس ارد تلفز اردن		Economy		Energy		Real
غارة إسرائيلية على وسط مدينة خان يونس جنوبي قطاع غزة الأردن غزة طوفان الأقصى	Politics	Israeli-Palestinian Conflict	Real		Politics	Israeli-Palestinian Conflict	Real	غارة إسرائيلية على وسط مدينة خان يونس جنوبي قطاع غزة الأردن غزة طوفان الأقصى	[('', 'غارة/NN'), ('', 'إسرائيلية/JJ'), ('', 'على/IN'), ('', 'وسط/NN'), ('', 'مدينة/NN'), ('', 'خان/NNP'), ('', 'يونس/NNP'), ('', 'جنوبي/NN'), ('', 'قطاع/NN'), ('', 'غزة/NNP'), ('', 'الأردن/DTNNP'), ('', 'التلفزيون/DTNN'), ('', 'الأردني/DTJJ'), ('', 'غزة/NNP'), ('', 'طوفان/NN'), ('', 'الأقصى/DTNN')]	['No Emotion Detected']	غار اسراييل وسط مدين خان يونس جنوب قطاع غز ارد تلفز اردن غز طوفا اقصى		Politics		Israeli-Palestinian Conflict		Real
إقرار نظام المجلس الأعلى للسلامة المرورية لسنة إقرار مشروع تزويد المؤسسات بالعمال الأردنيين الأردن	Government	Decisions	Real		Government	Decisions	Real	إقرار نظام المجلس الأعلى للسلامة المرورية لسنة إقرار مشروع تزويد المؤسسات بالعمال الأردنيين الأردن	[('', 'إقرار/NN'), ('', 'نظام/NN'), ('', 'المجلس/DTNN'), ('', 'الأعلى/DTJJ'), ('', 'للسلامة/NN'), ('', 'المرورية/DTJJ'), ('', 'لسنة/NN'), ('', 'إقرار/NN'), ('', 'مشروع/NN'), ('', 'تزويد/NN'), ('', 'المؤسسات/DTNNS'), ('', 'بالعمال/NN'), ('', 'الأردنيين/DTNNS'), ('', 'الأردن/DTJJ'), ('', 'التلفزيون/DTNN'), ('', 'الأردني/DTJJ')]	['Conflicting Emotions Detected']	اقرار نظام مجلس اعلى سلام مرور لسن اقرار مشروع تزويد موسس عمال اردن ارد تلفز اردن		Government		Decisions		Real
مظاهرات في تل أبيب ومدن إسرائيلية أخرى تطالب الحكومة بإبرام صفقة للإفراج عن الأسرى الإسرائيليين في غزة الأردن غزة طوفان الأقصى	Society	International	Real		Politics	Israeli-Palestinian Conflict	Real	مظاهرات في تل أبيب ومدن إسرائيلية أخرى تطالب الحكومة بإبرام صفقة للإفراج عن الأسرى الإسرائيليين في غزة الأردن غزة طوفان الأقصى	[('', 'مظاهرات/NNS'), ('', 'في/IN'), ('', 'تل/NN'), ('', 'أبيب/NNP'), ('', 'ومدن/NNP'), ('', 'إسرائيلية/NNP'), ('', 'أخرى/VBD'), ('', 'تطالب/VBP'), ('', 'الحكومة/DTNN'), ('', 'بإبرام/NNP'), ('', 'صفقة/NN'), ('', 'للإفراج/NN'), ('', 'عن/IN'), ('', 'الأسرى/DTNN'), ('', 'الإسرائيليين/DTJJ'), ('', 'في/IN'), ('', 'غزة/NNP'), ('', 'الأردن/DTNNP'), ('', 'التلفزيون/DTNN'), ('', 'الأردني/DTJJ'), ('', 'غزة…	['No Emotion Detected']	مظاهر تل ابيب ومد اسراييل اخرى تطالب حكوم ابرام صفق افراج اسرى اسراييل غز ارد تلفز اردن غز طوفا اقصى		Society		International		Real
الخصاونة البنك المركزي سيستمر بتمويل البرامج التي بدأ بتمويلها خلال جائحة كورونا الأردن	Economy	Financial Policies	Real		Economy	Financial Policies	Real	الخصاونة البنك المركزي سيستمر بتمويل البرامج التي بدأ بتمويلها خلال جائحة كورونا الأردن	[('', 'الخصاونة/DTNN'), ('', 'البنك/DTNN'), ('', 'المركزي/DTJJ'), ('', 'سيستمر/NNP'), ('', 'بتمويل/NNP'), ('', 'البرامج/DTNN'), ('', 'التي/WP'), ('', 'بدأ/VBD'), ('', 'بتمويلها/NN'), ('', 'خلال/NN'), ('', 'جائحة/NN'), ('', 'كورونا/NNP'), ('', 'الأردن/DTNNP'), ('', 'التلفزيون/DTNN'), ('', 'الأردني/DTJJ')]	['حزن']	خصاون بنك مركز سيستمر تمويل برامج بدء تمويل خلال جايح كور ارد تلفز اردن		Economy		Financial Policies		Real
الخصاونة توفير مخزون كافٍ من المواد الأساسية في أسواق المؤسستين المدنية والعسكرية الأردن	Economy	Local	Real		Economy	Local	Real	الخصاونة توفير مخزون كافٍ من المواد الأساسية في أسواق المؤسستين المدنية والعسكرية الأردن	[('', 'الخصاونة/DTNN'), ('', 'توفير/NN'), ('', 'مخزون/NN'), ('', 'كاف/JJ'), ('', 'من/IN'), ('', 'المواد/DTNN'), ('', 'الأساسية/DTJJ'), ('', 'في/IN'), ('', 'أسواق/NN'), ('', 'المؤسستين/DTNNS'), ('', 'المدنية/DTJJ'), ('', 'والعسكرية/JJ'), ('', 'الأردن/DTNN'), ('', 'التلفزيون/DTNN'), ('', 'الأردني/DTJJ')]	['حزن']	خصاون توفير مخزو كاف مواد اساس اسواق موسست مدن عسكر ارد تلفز اردن		Economy		Local		Real
الإعلام النيابية تبحث دور الجامعات في التوجيه الوطني الأردن	Education	University	Real		Education	University	Real	الإعلام النيابية تبحث دور الجامعات في التوجيه الوطني الأردن	[('', 'الإعلام/DTNN'), ('', 'النيابية/DTJJ'), ('', 'تبحث/VBP'), ('', 'دور/NN'), ('', 'الجامعات/DTNNS'), ('', 'في/IN'), ('', 'التوجيه/DTNN'), ('', 'الوطني/DTJJ'), ('', 'الأردن/DTJJ'), ('', 'التلفزيون/DTNN'), ('', 'الأردني/DTJJ')]	['حب']	اعلام نياب تبحث دور جامع توجيه وطن ارد تلفز اردن		Education		University		Real
اللجنة الإدارية النيابية تؤكد ضرورة تحسين الواقع الإداري لدائرة الأراضي الأردن	Government	Parliament	Real		Government	Parliament	Real	اللجنة الإدارية النيابية تؤكد ضرورة تحسين الواقع الإداري لدائرة الأراضي الأردن	[('', 'اللجنة/DTNN'), ('', 'الإدارية/DTJJ'), ('', 'النيابية/DTJJ'), ('', 'تؤكد/VBP'), ('', 'ضرورة/NN'), ('', 'تحسين/NN'), ('', 'الواقع/DTNN'), ('', 'الإداري/DTJJ'), ('', 'لدائرة/NN'), ('', 'الأراضي/DTNN'), ('', 'الأردن/DTJJ'), ('', 'التلفزيون/DTNN'), ('', 'الأردني/DTJJ')]	['حزن']	لجن ادار نياب توكد ضرور تحس واقع ادار داير اراض ارد تلفز اردن		Government		Parliament		Real
إصـابة عسكريين منـذ بدء العمليـة البرية منهـم إصـابة خطـرة الأردن غزة طوفان الأقصى	Military	Conflict	Real		Military	Conflict	Real	إصـابة عسكريين منـذ بدء العمليـة البرية منهـم إصـابة خطـرة الأردن غزة طوفان الأقصى	[('', 'إصـابة/NN'), ('', 'عسكريين/NNS'), ('', 'منـذ/JJ'), ('', 'بدء/NN'), ('', 'العمليـة/DTNN'), ('', 'البرية/DTJJ'), ('', 'منهـم/NN'), ('', 'إصـابة/NN'), ('', 'خطـرة/JJ'), ('', 'الأردن/DTNN'), ('', 'التلفزيون/DTNN'), ('', 'الأردني/DTJJ'), ('', 'غزة/NNP'), ('', 'طوفان/NN'), ('', 'الأقصى/DTNN')]	['No Emotion Detected']	اصاب عسكر منذ بدء عمل البر منهم اصاب خطر ارد تلفز اردن غز طوفا اقصى		Military		Conflict		Real
قرَّر مجلس الوزراء تعيين سحر حمَّاد الشَّخاترة أميناً عامَّاً لوزارة التَّربية والتَّعليم للشُّؤون الإداريَّة والماليَّة وذلك بعد حصولها على أعلى الدَّرجات في المسابقة التي أُجريت بموجب نظام التَّعيين على الوظائف القياديَّة الأردن	Government	Decisions	Real		Education	Administration	Real	قرَّر مجلس الوزراء تعيين سحر حمَّاد الشَّخاترة أميناً عامَّاً لوزارة التَّربية والتَّعليم للشُّؤون الإداريَّة والماليَّة وذلك بعد حصولها على أعلى الدَّرجات في المسابقة التي أُجريت بموجب نظام التَّعيين على الوظائف القياديَّة الأردن	[('', 'قرر/VBD'), ('', 'مجلس/NN'), ('', 'الوزراء/DTNN'), ('', 'تعيين/NN'), ('', 'سحر/NNP'), ('', 'حماد/NNP'), ('', 'الشخاترة/DTNNP'), ('', 'أمينا/NN'), ('', 'عاما/NN'), ('', 'لوزارة/NNP'), ('', 'التربية/DTNN'), ('', 'والتعليم/NNP'), ('', 'للشؤون/NNP'), ('', 'الإدارية/DTJJ'), ('', 'والمالية/NN'), ('', 'وذلك/NN'), ('', 'بعد/NN'), ('', 'حصولها/NN'), ('', 'على/IN'), ('', 'أعلى/JJR'), ('', 'الدرجات/DT…	['No Emotion Detected']	قرر مجلس وزراء تع سحر حماد شخاتر ام عام وزار ترب تعليم للشء ادار مال وذل حصول اعلى درج مسابق اجر موجب نظام التع وظايف قياد ارد تلفز اردن		Government		Decisions		Real
مـن سكـان غـزة هُجـروا قسرا بسبب العــدوان الإســرائيلي الأردن غزة طوفان الأقصى	Politics	Israeli-Palestinian Conflict	Real		Politics	Israeli-Palestinian Conflict	Real	مـن سكـان غـزة هُجـروا قسرا بسبب العــدوان الإســرائيلي الأردن غزة طوفان الأقصى	[('', 'مـن/NN'), ('', 'سكـان/NN'), ('', 'غـزة/NN'), ('', 'هجـروا/VBD'), ('', 'قسرا/NN'), ('', 'بسبب/NN'), ('', 'العــدوان/DTNN'), ('', 'الإســرائيلي/DTJJ'), ('', 'الأردن/DTJJ'), ('', 'التلفزيون/DTNN'), ('', 'الأردني/DTJJ'), ('', 'غزة/NNP'), ('', 'طوفان/NN'), ('', 'الأقصى/DTNN')]	['No Emotion Detected']	من سكا غز هجرو قسر سبب عدو اسراييل ارد تلفز اردن غز طوفا اقصى		Politics		Israeli-Palestinian Conflict		Real
أقرَّ مجلس الوزراء في جلسته التي عقدها اليوم الأحد برئاسة رئيس الوزراء الدكتور بشر الخصاونة نظام المجلس الأعلى للسَّلامة المروريَّة لسنة م ويأتي إقرار النِّظام لغايات تنظيم الشُّؤون المتعلِّقة بالمجلس بما في ذلك اجتماعاته واتِّخاذ قراراته ولتمكين المجلس من القيام بالمهام والواجبات المنوطة به كما قرَّر مجلس الوزراء الموافقة على الأسباب الموجبة لمشروع نظام تزويد المؤسَّسات بالعمَّال الأردنيين من خل…	Labor	Local	Real		Labor	Local	Real	أقرَّ مجلس الوزراء في جلسته التي عقدها اليوم الأحد برئاسة رئيس الوزراء الدكتور بشر الخصاونة نظام المجلس الأعلى للسَّلامة المروريَّة لسنة م ويأتي إقرار النِّظام لغايات تنظيم الشُّؤون المتعلِّقة بالمجلس بما في ذلك اجتماعاته واتِّخاذ قراراته ولتمكين المجلس من القيام بالمهام والواجبات المنوطة به كما قرَّر مجلس الوزراء الموافقة على الأسباب الموجبة لمشروع نظام تزويد المؤسَّسات بالعمَّال الأردنيين من خل…	[('', 'أقر/VBD'), ('', 'مجلس/NN'), ('', 'الوزراء/DTNN'), ('', 'في/IN'), ('', 'جلسته/NNP'), ('', 'التي/WP'), ('', 'عقدها/VBD'), ('', 'اليوم/DTNN'), ('', 'الأحد/DTNN'), ('', 'برئاسة/NN'), ('', 'رئيس/NN'), ('', 'الوزراء/DTNN'), ('', 'الدكتور/DTNN'), ('', 'بشر/VBD'), ('', 'الخصاونة/DTNN'), ('', 'نظام/NN'), ('', 'المجلس/DTNN'), ('', 'الأعلى/DTJJ'), ('', 'للسلامة/NN'), ('', 'المرورية/DTJJ'), ('', 'لسنة…	['Conflicting Emotions Detected']	اقر مجلس وزراء جلس عقد يوم احد رياس رييس وزراء دكتور بشر خصاون نظام مجلس اعلى سلام مرور لسن ويء اقرار نظام لغا تنظيم الشء متعلق مجلس اجتماع واتخاذ قرار لتمك مجلس قيام مهام واجب منوط قرر مجلس وزراء موافق اسباب موجب مشروع نظام تزويد موسس عمال اردن خلال مزود خدم لسن تمهيد ارسال ديوا تشريع والرء استكمال اجراء اقرار اصول ويء مشروع نظام انسجام صدور قانو معدل لقان عمل رقم لسن وبم يمك زار عمل اداء ادوار …		Labor		Local		Real
ارتفـــاع عدد ضحايا العدوان الإسرائيلي إلى عدد كبير جدا	Politics	Israeli-Palestinian Conflict	Real		Politics	Local	Fake	ارتفـــاع عدد ضحايا العدوان الإسرائيلي إلى عدد كبير جدا	[('', 'ارتفـــاع/VBD'), ('', 'عدد/NN'), ('', 'ضحايا/NN'), ('', 'العدوان/DTNN'), ('', 'الإسرائيلي/DTJJ'), ('', 'إلى/VBD'), ('', 'عدد/NN'), ('', 'كبير/JJ'), ('', 'جدا/NN')]	['اشمئزاز']	ارتفاع عدد ضحا عدو اسراييل عدد كبير جدا		Politics		Israeli-Palestinian Conflict		Real
رئيس الوزراء الدكتور بشر الخصاونة يوجِّه الوزارات والجهات المعنيَّة إلى اتِّخاذ التَّدابير والإجراءات اللازمة للتَّعامل مع الآثار التضخُّميَّة المحتملة بسبب التطوُّرات الإقليميَّة النَّاجمة عن العدوان الإسرائيلي المستمرّ على أشقَّائنا في قطاع غزَّة الخصاونة تبنِّي إجراء لوضع سقف جُمركي على قيمة الحاويات الواردة إلى سعرها الذي كان قائماً ما قبل تاريخ تشرين الأوَّل من العام الماضي الأردن	Politics	Israeli-Palestinian Conflict	Real		Politics	Local	Real	رئيس الوزراء الدكتور بشر الخصاونة يوجِّه الوزارات والجهات المعنيَّة إلى اتِّخاذ التَّدابير والإجراءات اللازمة للتَّعامل مع الآثار التضخُّميَّة المحتملة بسبب التطوُّرات الإقليميَّة النَّاجمة عن العدوان الإسرائيلي المستمرّ على أشقَّائنا في قطاع غزَّة الخصاونة تبنِّي إجراء لوضع سقف جُمركي على قيمة الحاويات الواردة إلى سعرها الذي كان قائماً ما قبل تاريخ تشرين الأوَّل من العام الماضي الأردن	[('', 'رئيس/NN'), ('', 'الوزراء/DTNN'), ('', 'الدكتور/DTNN'), ('', 'بشر/VBD'), ('', 'الخصاونة/DTNN'), ('', 'يوجه/VBP'), ('', 'الوزارات/DTNNS'), ('', 'والجهات/NN'), ('', 'المعنية/DTNN'), ('', 'إلى/VBD'), ('', 'اتخاذ/NN'), ('', 'التدابير/DTNN'), ('', 'والإجراءات/NNS'), ('', 'اللازمة/VN'), ('', 'للتعامل/NN'), ('', 'مع/NN'), ('', 'الآثار/DTNN'), ('', 'التضخمية/DTJJ'), ('', 'المحتملة/DTJJ'), ('', 'بسب…	['اشمئزاز']	رييس وزراء دكتور بشر خصاون يوج وزار والجه معن اتخاذ تدابير اجراء لازم تعامل اثار تضخم محتمل سبب تطور اقليم ناجم عدو اسراييل مستمر اشقاء قطاع غز خصاون تبن اجراء لوضع سقف جمر قيم حاو وارد سعر قايم تاريخ اول عام ماض ارد تلفز اردن		Politics		Israeli-Palestinian Conflict		Real
إرادة ملكية بترفيع عدد من قضاة الشرع صدرت الإرادة الملكية السامية بالموافقة على قرار المجلس القضائي الشرعي بترفيع عدد من أصحاب الفضيلة قضاة الشرع الشريف وتضمن القرار الترفيع إلى أدنى مربوط الدرجة الثانية لاصحاب الفضيلة أكرم هاشم منصور نصار الدكتور إياد محمد علي عباسي محمد علي توفيق المومني الدكتور محمود أحمد محمود أبو رمان حسين فواز زايد السعود محمد موسى محمد بني عواد الدكتور عماد محمد ابنيه الضي…	Government	Decisions	Real		Government	Local	Real	إرادة ملكية بترفيع عدد من قضاة الشرع صدرت الإرادة الملكية السامية بالموافقة على قرار المجلس القضائي الشرعي بترفيع عدد من أصحاب الفضيلة قضاة الشرع الشريف وتضمن القرار الترفيع إلى أدنى مربوط الدرجة الثانية لاصحاب الفضيلة أكرم هاشم منصور نصار الدكتور إياد محمد علي عباسي محمد علي توفيق المومني الدكتور محمود أحمد محمود أبو رمان حسين فواز زايد السعود محمد موسى محمد بني عواد الدكتور عماد محمد ابنيه الضي…	[('', 'إرادة/NN'), ('', 'ملكية/NN'), ('', 'بترفيع/NN'), ('', 'عدد/NN'), ('', 'من/IN'), ('', 'قضاة/NN'), ('', 'الشرع/DTNNP'), ('', 'صدرت/VBD'), ('', 'الإرادة/DTNN'), ('', 'الملكية/DTJJ'), ('', 'السامية/DTJJ'), ('', 'بالموافقة/VN'), ('', 'على/IN'), ('', 'قرار/NN'), ('', 'المجلس/DTNN'), ('', 'القضائي/DTJJ'), ('', 'الشرعي/DTJJ'), ('', 'بترفيع/NN'), ('', 'عدد/NN'), ('', 'من/IN'), ('', 'أصحاب/NN'), (''…	['Conflicting Emotions Detected']	اراد ملك ترفيع عدد قضا شرع صدر اراد ملك سام موافق قرار مجلس قضاء شرع ترفيع عدد اصحاب فضيل قضا شرع شريف تضم قرار ترفيع ادنى مربوط درج ثان اصحاب فضيل اكرم هاشم منصور نصار دكتور اياد محمد عل عباس محمد عل توفيق مومن دكتور محمود احمد محمود رما حس واز زايد سعود محمد موسى محمد بن عواد دكتور عماد محمد ابن ضيافل دكتور حازم احمد هزايم محمد عبدالحافظ لاح غنان عل فايز عبدالرحم بن واز احمد مصطفى احمد زعارير م…		Government		Decisions		Real
رئيس الوزراء الدكتور بشر الخصاونة توفير مخزون كافٍ من المواد الأساسيَّة في المؤسَّستين الاستهلاكيَّتين بأسعارها الحاليَّة حتى نهاية رمضان البنك المركزي سيستمرُّ بتمويل البرامج التي بدأ بتمويلها خلال جائحة كورونا بواقع مليار و مليون دينار انتظام سيرورة الحياة الاقتصاديَّة أمر أساسي مع محافظتنا على التَّضامن مع أشقَّائنا في فلسطين تعزيز الأدوات الرَّقابيَّة والرَّدع الكامل لأيِّ قلَّة تبغي استغلال …	Economy	Financial Policies	Real		Economy	Local	Real	رئيس الوزراء الدكتور بشر الخصاونة توفير مخزون كافٍ من المواد الأساسيَّة في المؤسَّستين الاستهلاكيَّتين بأسعارها الحاليَّة حتى نهاية رمضان البنك المركزي سيستمرُّ بتمويل البرامج التي بدأ بتمويلها خلال جائحة كورونا بواقع مليار و مليون دينار انتظام سيرورة الحياة الاقتصاديَّة أمر أساسي مع محافظتنا على التَّضامن مع أشقَّائنا في فلسطين تعزيز الأدوات الرَّقابيَّة والرَّدع الكامل لأيِّ قلَّة تبغي استغلال …	[('', 'رئيس/NN'), ('', 'الوزراء/DTNN'), ('', 'الدكتور/DTNN'), ('', 'بشر/VBD'), ('', 'الخصاونة/DTNN'), ('', 'توفير/NN'), ('', 'مخزون/NN'), ('', 'كاف/JJ'), ('', 'من/IN'), ('', 'المواد/DTNN'), ('', 'الأساسية/DTJJ'), ('', 'في/IN'), ('', 'المؤسستين/DTNNS'), ('', 'الاستهلاكيتين/DTJJ'), ('', 'بأسعارها/NN'), ('', 'الحالية/DTJJ'), ('', 'حتى/IN'), ('', 'نهاية/NN'), ('', 'رمضان/NNP'), ('', 'البنك/DTNN'), ('…	['Conflicting Emotions Detected']	رييس وزراء دكتور بشر خصاون توفير مخزو كاف مواد اساس موسست استهلاكيت اسعار حال نها رمضا بنك مركز سيستمر تمويل برامج بدء تمويل خلال جايح كور واقع مليار مليو انتظام سيرور حيا اقتصاد امر اساس محافظ تضام اشقاء لسط تعزيز ادو رقاب ردع كامل لء قل تبغ استغلال اوضاع استثناء تاثير قوت مواط ارد تلفز اردن		Economy		Financial Policies		Real
الخصاونة توفير مخزون كافٍ من المواد الأساسيَّة في المؤسَّستين الاستهلاكيَّتين بأسعارها الحاليَّة حتى نهاية رمضان الأردن	Economy	Financial Policies	Real		Economy	Local	Real	الخصاونة توفير مخزون كافٍ من المواد الأساسيَّة في المؤسَّستين الاستهلاكيَّتين بأسعارها الحاليَّة حتى نهاية رمضان الأردن	[('', 'الخصاونة/DTNN'), ('', 'توفير/NN'), ('', 'مخزون/NN'), ('', 'كاف/JJ'), ('', 'من/IN'), ('', 'المواد/DTNN'), ('', 'الأساسية/DTJJ'), ('', 'في/IN'), ('', 'المؤسستين/DTNNS'), ('', 'الاستهلاكيتين/DTJJ'), ('', 'بأسعارها/NN'), ('', 'الحالية/DTJJ'), ('', 'حتى/IN'), ('', 'نهاية/NN'), ('', 'رمضان/NNP'), ('', 'الأردن/DTNNP'), ('', 'التلفزيون/DTNN'), ('', 'الأردني/DTJJ')]	['حزن']	خصاون توفير مخزو كاف مواد اساس موسست استهلاكيت اسعار حال نها رمضا ارد تلفز اردن		Economy		Financial Policies		Real
رئيس الوزراء الدكتور بشر الخصاونة يوجِّه الوزارات والجهات المعنيَّة إلى اتِّخاذ التَّدابير والإجراءات اللازمة للتَّعامل مع الآثار التضخُّميَّة المحتملة بسبب التطوُّرات الإقليميَّة النَّاجمة عن العدوان الإسرائيلي المستمرّ على أشقَّائنا في قطاع غزَّة الأردن	Government	Assistance	Real		Government	Local	Real	رئيس الوزراء الدكتور بشر الخصاونة يوجِّه الوزارات والجهات المعنيَّة إلى اتِّخاذ التَّدابير والإجراءات اللازمة للتَّعامل مع الآثار التضخُّميَّة المحتملة بسبب التطوُّرات الإقليميَّة النَّاجمة عن العدوان الإسرائيلي المستمرّ على أشقَّائنا في قطاع غزَّة الأردن	[('', 'رئيس/NN'), ('', 'الوزراء/DTNN'), ('', 'الدكتور/DTNN'), ('', 'بشر/VBD'), ('', 'الخصاونة/DTNN'), ('', 'يوجه/VBP'), ('', 'الوزارات/DTNNS'), ('', 'والجهات/NN'), ('', 'المعنية/DTNN'), ('', 'إلى/VBD'), ('', 'اتخاذ/NN'), ('', 'التدابير/DTNN'), ('', 'والإجراءات/NNS'), ('', 'اللازمة/VN'), ('', 'للتعامل/NN'), ('', 'مع/NN'), ('', 'الآثار/DTNN'), ('', 'التضخمية/DTJJ'), ('', 'المحتملة/DTJJ'), ('', 'بسب…	['اشمئزاز']	رييس وزراء دكتور بشر خصاون يوج وزار والجه معن اتخاذ تدابير اجراء لازم تعامل اثار تضخم محتمل سبب تطور اقليم ناجم عدو اسراييل مستمر اشقاء قطاع غز ارد تلفز اردن		Government		Assistance		Real
المقاومة صامدة واسرائيل لم تستطع حسم الموقف عبد المجيد جرادات كاتب ومحلل سياسي طوفان الأقصى غزة الأردن	Politics	Israeli-Palestinian Conflict	Real		Politics	Local	Real	المقاومة صامدة واسرائيل لم تستطع حسم الموقف عبد المجيد جرادات كاتب ومحلل سياسي طوفان الأقصى غزة الأردن	[('', 'المقاومة/DTNN'), ('', 'صامدة/JJ'), ('', 'واسرائيل/JJ'), ('', 'لم/RP'), ('', 'تستطع/VBP'), ('', 'حسم/NN'), ('', 'الموقف/DTNN'), ('', 'عبد/NNP'), ('', 'المجيد/DTNNP'), ('', 'جرادات/NN'), ('', 'كاتب/NN'), ('', 'ومحلل/NN'), ('', 'سياسي/JJ'), ('', 'طوفان/NN'), ('', 'الأقصى/DTNN'), ('', 'غزة/NNP'), ('', 'الأردن/DTNNP'), ('', 'التلفزيون/DTNN'), ('', 'الأردني/DTJJ')]	['Conflicting Emotions Detected']	مقاوم صامد واسراييل تستطع حسم موقف عبد مجيد جراد كاتب محلل سياس طوفا اقصى غز ارد تلفز اردن		Politics		Israeli-Palestinian Conflict		Real
بلدية أم الجمال تستكمل مشاريعها الخدمية لتحسين واقع البنية التحتية تقرير يوسف المشاقبة الأردن	Environment	Infrastructure	Real		Environment	Local	Real	بلدية أم الجمال تستكمل مشاريعها الخدمية لتحسين واقع البنية التحتية تقرير يوسف المشاقبة الأردن	[('', 'بلدية/NN'), ('', 'أم/NN'), ('', 'الجمال/DTNN'), ('', 'تستكمل/VBP'), ('', 'مشاريعها/NN'), ('', 'الخدمية/DTJJ'), ('', 'لتحسين/NNS'), ('', 'واقع/NN'), ('', 'البنية/DTNN'), ('', 'التحتية/DTJJ'), ('', 'تقرير/NN'), ('', 'يوسف/NNP'), ('', 'المشاقبة/DTJJ'), ('', 'الأردن/DTJJ'), ('', 'التلفزيون/DTNN'), ('', 'الأردني/DTJJ')]	['حزن']	بلد جمال تستكمل مشاريع خدم لتحس واقع البن تحت تقرير يوسف مشاقب ارد تلفز اردن		Environment		Infrastructure		Real
ولي العهد عبر إنستغرام برنامج عمل حافل في سنغافورة ركز على التبادل المعرفي في مجالات التعليم والتدريب المهني والتقني وتطوير التكنولوجيا والإصلاح الإداري وتشجيع السياحة وإيجاد الفرص الاقتصادية	Government	Diplomacy Relations	Real		Government	Local	Real	ولي العهد عبر إنستغرام برنامج عمل حافل في سنغافورة ركز على التبادل المعرفي في مجالات التعليم والتدريب المهني والتقني وتطوير التكنولوجيا والإصلاح الإداري وتشجيع السياحة وإيجاد الفرص الاقتصادية	[('', 'ولي/NN'), ('', 'العهد/DTNN'), ('', 'عبر/NN'), ('', 'إنستغرام/NN'), ('', 'برنامج/NN'), ('', 'عمل/NN'), ('', 'حافل/JJ'), ('', 'في/IN'), ('', 'سنغافورة/NNP'), ('', 'ركز/VBD'), ('', 'على/IN'), ('', 'التبادل/DTNN'), ('', 'المعرفي/DTJJ'), ('', 'في/IN'), ('', 'مجالات/NNS'), ('', 'التعليم/DTNN'), ('', 'والتدريب/NNP'), ('', 'المهني/DTJJ'), ('', 'والتقني/NNP'), ('', 'وتطوير/NNP'), ('', 'التكنولوجيا/…	['Conflicting Emotions Detected']	ول عهد عبر انستغرام رنامج عمل حافل سنغافور ركز تبادل معرف مجال تعليم تدريب مهن والتق تطوير تكنولوج اصلاح ادار تشجيع سياح ايجاد فرص اقتصاد ارد تلفز اردن		Government		Diplomacy Relations		Real
الحكومة السودانية ترفض دعوة إلى قمة افريقية للوساطة مع الدعم السريع الأردن	Politics	International	Real		Politics	Local	Real	الحكومة السودانية ترفض دعوة إلى قمة افريقية للوساطة مع الدعم السريع الأردن	[('', 'الحكومة/DTNN'), ('', 'السودانية/DTJJ'), ('', 'ترفض/VBP'), ('', 'دعوة/NN'), ('', 'إلى/NN'), ('', 'قمة/NN'), ('', 'افريقية/JJ'), ('', 'للوساطة/JJ'), ('', 'مع/NN'), ('', 'الدعم/DTNN'), ('', 'السريع/DTJJ'), ('', 'الأردن/DTJJ'), ('', 'التلفزيون/DTNN'), ('', 'الأردني/DTJJ')]	['Conflicting Emotions Detected']	حكوم سودان ترفض دعو قم افريق وساط دعم سريع ارد تلفز اردن		Politics		International		Real
بايدن أمريكا سلمت رسالة إلى ايران بشأن هجمات الحوثيين الأردن	Politics	International	Real		Politics	Local	Real	بايدن أمريكا سلمت رسالة إلى ايران بشأن هجمات الحوثيين الأردن	[('', 'بايدن/NNP'), ('', 'أمريكا/NNP'), ('', 'سلمت/VBD'), ('', 'رسالة/NN'), ('', 'إلى/VBD'), ('', 'ايران/NNP'), ('', 'بشأن/NNP'), ('', 'هجمات/NNS'), ('', 'الحوثيين/DTNNS'), ('', 'الأردن/DTJJ'), ('', 'التلفزيون/DTNN'), ('', 'الأردني/DTJJ')]	['خوف']	ايد امر سلم رسال ايرا بشء هجم حوث ارد تلفز اردن		Politics		International		Real
مظاهرات حول العالم تطالب بوقف المجازر الاسرائيلية في غزة طوفان الأقصى الأردن	Society	International	Real		Society	Local	Real	مظاهرات حول العالم تطالب بوقف المجازر الاسرائيلية في غزة طوفان الأقصى الأردن	[('', 'مظاهرات/NNS'), ('', 'حول/NN'), ('', 'العالم/DTNN'), ('', 'تطالب/VBP'), ('', 'بوقف/NN'), ('', 'المجازر/DTNN'), ('', 'الاسرائيلية/DTJJ'), ('', 'في/IN'), ('', 'غزة/NNP'), ('', 'طوفان/NN'), ('', 'الأقصى/DTNN'), ('', 'الأردن/DTJJ'), ('', 'التلفزيون/DTNN'), ('', 'الأردني/DTJJ')]	['No Emotion Detected']	مظاهر حول عالم تطالب وقف مجازر اسراييل غز طوفا اقصى ارد تلفز اردن		Society		International		Real
تصعيد غير مسبوق في الضفة الغربية شبيه بما يجري بالقطاع من تجريف للبنى التحتية راسم عبيدات كاتب وباحث سياسي القدس طوفان الأقصى غزة الأردن	Politics	Israeli-Palestinian Conflict	Real		Politics	Local	Real	تصعيد غير مسبوق في الضفة الغربية شبيه بما يجري بالقطاع من تجريف للبنى التحتية راسم عبيدات كاتب وباحث سياسي القدس طوفان الأقصى غزة الأردن	[('', 'تصعيد/NN'), ('', 'غير/NN'), ('', 'مسبوق/JJ'), ('', 'في/IN'), ('', 'الضفة/DTNNP'), ('', 'الغربية/DTJJ'), ('', 'شبيه/NN'), ('', 'بما/NN'), ('', 'يجري/VBP'), ('', 'بالقطاع/NN'), ('', 'من/IN'), ('', 'تجريف/NN'), ('', 'للبنى/DTNN'), ('', 'التحتية/DTJJ'), ('', 'راسم/VBD'), ('', 'عبيدات/NNS'), ('', 'كاتب/NN'), ('', 'وباحث/NN'), ('', 'سياسي/JJ'), ('', 'القدس/DTNNP'), ('', 'طوفان/NN'), ('', 'الأقصى…	['حزن']	تصعيد مسبوق الضف غرب شب يجر قطاع تجريف بنى تحت راسم عبيد كاتب احث سياس قدس طوفا اقصى غز ارد تلفز اردن		Politics		Israeli-Palestinian Conflict		Real
مراسلون بلا حدود الجنائية ستحقق بجرائم اسرائيل ضد الصحافيين طوفان الأقصى غزة الأردن	Politics	Israeli-Palestinian Conflict	Real		Politics	Local	Real	مراسلون بلا حدود الجنائية ستحقق بجرائم اسرائيل ضد الصحافيين طوفان الأقصى غزة الأردن	[('', 'مراسلون/NNS'), ('', 'بلا/NNP'), ('', 'حدود/NN'), ('', 'الجنائية/DTJJ'), ('', 'ستحقق/NN'), ('', 'بجرائم/NN'), ('', 'اسرائيل/NNP'), ('', 'ضد/NN'), ('', 'الصحافيين/DTNNS'), ('', 'طوفان/NN'), ('', 'الأقصى/DTNN'), ('', 'غزة/NNP'), ('', 'الأردن/DTNNP'), ('', 'التلفزيون/DTNN'), ('', 'الأردني/DTJJ')]	['غضب']	مراسل بلا حدود جناء ستحقق جرايم اسراييل ضد صحاف طوفا اقصى غز ارد تلفز اردن		Politics		Israeli-Palestinian Conflict		Real
الخارجية المصرية لم نمنع أو نعطل دخول أية شاحنات لقطاع غزة طوفان الأقصى الأردن	Humanitarian	Aid	Real		Humanitarian	Local	Real	الخارجية المصرية لم نمنع أو نعطل دخول أية شاحنات لقطاع غزة طوفان الأقصى الأردن	[('', 'الخارجية/DTNN'), ('', 'المصرية/DTJJ'), ('', 'لم/RP'), ('', 'نمنع/VBP'), ('', 'أو/NN'), ('', 'نعطل/VBP'), ('', 'دخول/NN'), ('', 'أية/NN'), ('', 'شاحنات/NNS'), ('', 'لقطاع/NN'), ('', 'غزة/NNP'), ('', 'طوفان/NN'), ('', 'الأقصى/DTNN'), ('', 'الأردن/DTJJ'), ('', 'التلفزيون/DTNN'), ('', 'الأردني/DTJJ')]	['سعادة']	خارج مصر نمنع نعطل دخول اي شاحن قطاع غز طوفا اقصى ارد تلفز اردن		Humanitarian		Aid		Real
لازاريني ما يجري في غزة يلطخ إنسانيتنا المشتركة تقرير هيلين الكردي طوفان الأقصى الأردن	Politics	Israeli-Palestinian Conflict	Real		Politics	Local	Real	لازاريني ما يجري في غزة يلطخ إنسانيتنا المشتركة تقرير هيلين الكردي طوفان الأقصى الأردن	[('', 'لازاريني/NNP'), ('', 'ما/WP'), ('', 'يجري/VBP'), ('', 'في/IN'), ('', 'غزة/NNP'), ('', 'يلطخ/VBP'), ('', 'إنسانيتنا/NN'), ('', 'المشتركة/DTJJ'), ('', 'تقرير/NN'), ('', 'هيلين/NNP'), ('', 'الكردي/DTNNP'), ('', 'طوفان/NN'), ('', 'الأقصى/DTNN'), ('', 'الأردن/DTJJ'), ('', 'التلفزيون/DTNN'), ('', 'الأردني/DTJJ')]	['Conflicting Emotions Detected']	ازار يجر غز يلطخ انسان مشترك تقرير هيل كرد طوفا اقصى ارد تلفز اردن		Politics		Israeli-Palestinian Conflict		Real
قوات الاحتلال الاسرائيلي تقتحم عدة مدن بـ الضفة الغربية تقرير محمد المومني طوفان الأقصى غزة الأردن	Politics	Israeli-Palestinian Conflict	Real		Politics	Local	Real	قوات الاحتلال الاسرائيلي تقتحم عدة مدن بـ الضفة الغربية تقرير محمد المومني طوفان الأقصى غزة الأردن	[('', 'قوات/NNS'), ('', 'الاحتلال/DTNN'), ('', 'الاسرائيلي/DTJJ'), ('', 'تقتحم/VBP'), ('', 'عدة/NN'), ('', 'مدن/NN'), ('', 'بـ/NN'), ('', 'الضفة/DTNNP'), ('', 'الغربية/DTJJ'), ('', 'تقرير/NN'), ('', 'محمد/NNP'), ('', 'المومني/DTNNP'), ('', 'طوفان/NN'), ('', 'الأقصى/DTNN'), ('', 'غزة/NNP'), ('', 'الأردن/DTNNP'), ('', 'التلفزيون/DTNN'), ('', 'الأردني/DTJJ')]	['No Emotion Detected']	قوا احتلال اسراييل تقتحم عد مدن ب الضف غرب تقرير محمد مومن طوفا اقصى غز ارد تلفز اردن		Politics		Israeli-Palestinian Conflict		Real
مداهمات واقتحامات واعتقالات طالت شقيقتي الشهيد صالح العاروري فجر اليوم نوال حجازي مراسلة طوفان الأقصى غزة الأردن	Politics	Israeli-Palestinian Conflict	Real		Politics	Local	Real	مداهمات واقتحامات واعتقالات طالت شقيقتي الشهيد صالح العاروري فجر اليوم نوال حجازي مراسلة طوفان الأقصى غزة الأردن	[('', 'مداهمات/NNS'), ('', 'واقتحامات/NNS'), ('', 'واعتقالات/NNS'), ('', 'طالت/VBD'), ('', 'شقيقتي/NNS'), ('', 'الشهيد/DTNN'), ('', 'صالح/NNP'), ('', 'العاروري/DTNNP'), ('', 'فجر/VBD'), ('', 'اليوم/DTNN'), ('', 'نوال/NNP'), ('', 'حجازي/NNP'), ('', 'مراسلة/NN'), ('', 'التلفزيون/DTNN'), ('', 'الأردني/DTJJ'), ('', 'طوفان/NN'), ('', 'الأقصى/DTNN'), ('', 'غزة/NNP'), ('', 'الأردن/DTNNP')]	['Conflicting Emotions Detected']	مداهم واقتحام واعتقال طال شق شهيد صالح عارور فجر يوم نوال حجاز مراسل تلفز اردن طوفا اقصى غز ارد		Politics		Israeli-Palestinian Conflict		Real
العدوان الاسرائيلي على قطاع غزة يدخل يومه الـ تقرير ضياء الدلقموني طوفان الأقصى الأردن	Politics	Israeli-Palestinian Conflict	Real		Politics	Local	Real	العدوان الاسرائيلي على قطاع غزة يدخل يومه الـ تقرير ضياء الدلقموني طوفان الأقصى الأردن	[('', 'العدوان/DTNN'), ('', 'الاسرائيلي/DTJJ'), ('', 'على/IN'), ('', 'قطاع/NN'), ('', 'غزة/NNP'), ('', 'يدخل/VBP'), ('', 'يومه/NN'), ('', 'الـ/DTNN'), ('', 'تقرير/NN'), ('', 'ضياء/NN'), ('', 'الدلقموني/DTNN'), ('', 'طوفان/NN'), ('', 'الأقصى/DTNN'), ('', 'الأردن/DTJJ'), ('', 'التلفزيون/DTNN'), ('', 'الأردني/DTJJ')]	['اشمئزاز']	عدو اسراييل قطاع غز يدخل يوم ال تقرير ضياء دلقمون طوفا اقصى ارد تلفز اردن		Politics		Israeli-Palestinian Conflict		Real
نشرة أخبار منتصف النهار الأحد	Media	News	Real		Media	Local	Real	نشرة أخبار منتصف النهار الأحد	[('', 'نشرة/NN'), ('', 'أخبار/NN'), ('', 'منتصف/NN'), ('', 'النهار/DTNNP'), ('', 'الأحد/DTNN'), ('', 'الأردن/DTJJ'), ('', 'التلفزيون/DTNN'), ('', 'الأردني/DTJJ')]	['اشمئزاز']	نشر اخبار منتصف نهار احد ارد تلفز اردن		Media		News		Real
وادي موسى حفريات تتسبب بانهيار شارع والأهالي يطالبون بشارع بديل زياد الطويسي مندوب م حمزة العلياني مفوض البنية التحتية والاستثمار سلطة اقليم البترا الأردن يحدث اليوم	Environment	Infrastructure	Real		Environment	Local	Real	وادي موسى حفريات تتسبب بانهيار شارع والأهالي يطالبون بشارع بديل زياد الطويسي مندوب م حمزة العلياني مفوض البنية التحتية والاستثمار سلطة اقليم البترا الأردن يحدث اليوم	[('', 'وادي/NNP'), ('', 'موسى/NNP'), ('', 'حفريات/NNS'), ('', 'تتسبب/VBP'), ('', 'بانهيار/NNP'), ('', 'شارع/NN'), ('', 'والأهالي/NNP'), ('', 'يطالبون/VBP'), ('', 'بشارع/NN'), ('', 'بديل/NN'), ('', 'زياد/NNP'), ('', 'الطويسي/DTNNP'), ('', 'مندوب/NN'), ('', 'التلفزيون/DTNN'), ('', 'الأردني/DTJJ'), ('', 'م/IN'), ('', 'حمزة/NNP'), ('', 'العلياني/DTJJ'), ('', 'مفوض/NN'), ('', 'البنية/DTNN'), ('', 'الت…	['حزن']	واد موسى حفر تتسبب انهيار شارع اهال يطالب شارع ديل زياد طويس مندوب تلفز اردن حمز عليان مفوض البن تحت استثمار سلط اقليم البت ارد يحدث يوم		Environment		Infrastructure		Real
مياه الأمطار والصرف الصحي تداهم مراكز الإيواء في قطاع غزة الأردن	Humanitarian	Israeli-Palestinian Conflict	Real		Environment	Local	Real	مياه الأمطار والصرف الصحي تداهم مراكز الإيواء في قطاع غزة الأردن	[('', 'مياه/NN'), ('', 'الأمطار/DTNN'), ('', 'والصرف/NN'), ('', 'الصحي/DTJJ'), ('', 'تداهم/VBP'), ('', 'مراكز/NN'), ('', 'الإيواء/DTNN'), ('', 'في/IN'), ('', 'قطاع/NN'), ('', 'غزة/NNP'), ('', 'الأردن/DTNNP'), ('', 'التلفزيون/DTNN'), ('', 'الأردني/DTJJ')]	['حزن']	ميا امطار صرف الصح تدا مراكز ايواء قطاع غز ارد تلفز اردن		Humanitarian		Israeli-Palestinian Conflict		Real
وزارة المياه ارتفاع معدل الهطول المطري وتخزين السدود عمر سلامة الناطق الإعلامي في وزارة المياه الأردن يحدث اليوم	Environment	Water Management	Real		Environment	Local	Real	وزارة المياه ارتفاع معدل الهطول المطري وتخزين السدود عمر سلامة الناطق الإعلامي في وزارة المياه الأردن يحدث اليوم	[('', 'وزارة/NN'), ('', 'المياه/DTNN'), ('', 'ارتفاع/NN'), ('', 'معدل/NN'), ('', 'الهطول/DTNN'), ('', 'المطري/DTJJ'), ('', 'وتخزين/NNS'), ('', 'السدود/DTNN'), ('', 'عمر/NNP'), ('', 'سلامة/NNP'), ('', 'الناطق/DTNN'), ('', 'الإعلامي/DTJJ'), ('', 'في/IN'), ('', 'وزارة/NN'), ('', 'المياه/DTNN'), ('', 'الأردن/DTJJ'), ('', 'التلفزيون/DTNN'), ('', 'الأردني/DTJJ'), ('', 'يحدث/VBP'), ('', 'اليوم/DTNN')]	['حب']	زار مياه ارتفاع معدل هطول مطر تخز سدود عمر سلام ناطق اعلام زار مياه ارد تلفز اردن يحدث يوم		Environment		Water Management		Real
أجواء باردة في أغلب المناطق وتحذيرات من تشكل الضباب والصقيع م أيمن صبح رئيس قسم التنبؤات الجوية الأردن يحدث اليوم الطقس	Weather	Forecast	Real		Weather	Local	Real	أجواء باردة في أغلب المناطق وتحذيرات من تشكل الضباب والصقيع م أيمن صبح رئيس قسم التنبؤات الجوية الأردن يحدث اليوم الطقس	[('', 'أجواء/NN'), ('', 'باردة/JJ'), ('', 'في/IN'), ('', 'أغلب/NN'), ('', 'المناطق/DTNN'), ('', 'وتحذيرات/NNS'), ('', 'من/IN'), ('', 'تشكل/VBP'), ('', 'الضباب/DTNN'), ('', 'والصقيع/NN'), ('', 'م/IN'), ('', 'أيمن/NN'), ('', 'صبح/VBP'), ('', 'رئيس/NN'), ('', 'قسم/NN'), ('', 'التنبؤات/DTNNS'), ('', 'الجوية/DTJJ'), ('', 'الأردن/DTJJ'), ('', 'التلفزيون/DTNN'), ('', 'الأردني/DTJJ'), ('', 'يحدث/VBP'), (…	['حزن']	اجواء ارد اغلب مناطق تحذير تشكل ضباب صقيع ايم صبح رييس قسم تنبء الجو ارد تلفز اردن يحدث يوم طقس		Weather		Forecast		Real
المرصد الأورومتوسطي لحقوق الإنسان ألف فلسطيني بين شهيد ومفقود وجريح في اليوم الـ لجريمة الإبادة الجماعية الإسرائيلية بحق قطاع غزة إسرائيل ارتكبت جرائم حرب مروعة ضحيتها بمعدل فلسطيني من القطاع يوميًا في أكثر إحصائية دموية في التاريخ الحديث للحروب نحو من الضحايا في غزة من المدنيين بمن في ذلك طفلًا و امرأة و عاملًا في المجال الصحي و من عناصر الدفاع المدني و صحافيًا مليون و ألف فلسطيني نزحوا قسرا من …	Humanitarian	Israeli-Palestinian Conflict	Real		Humanitarian	Local	Real	المرصد الأورومتوسطي لحقوق الإنسان ألف فلسطيني بين شهيد ومفقود وجريح في اليوم الـ لجريمة الإبادة الجماعية الإسرائيلية بحق قطاع غزة إسرائيل ارتكبت جرائم حرب مروعة ضحيتها بمعدل فلسطيني من القطاع يوميًا في أكثر إحصائية دموية في التاريخ الحديث للحروب نحو من الضحايا في غزة من المدنيين بمن في ذلك طفلًا و امرأة و عاملًا في المجال الصحي و من عناصر الدفاع المدني و صحافيًا مليون و ألف فلسطيني نزحوا قسرا من …	[('', 'المرصد/DTNN'), ('', 'الأورومتوسطي/DTJJ'), ('', 'لحقوق/NN'), ('', 'الإنسان/DTNN'), ('', 'ألف/NN'), ('', 'فلسطيني/JJ'), ('', 'بين/NN'), ('', 'شهيد/NN'), ('', 'ومفقود/NN'), ('', 'وجريح/JJ'), ('', 'في/IN'), ('', 'اليوم/DTNN'), ('', 'الـ/DTNN'), ('', 'لجريمة/NN'), ('', 'الإبادة/DTNN'), ('', 'الجماعية/DTJJ'), ('', 'الإسرائيلية/DTJJ'), ('', 'بحق/NN'), ('', 'قطاع/NN'), ('', 'غزة/NNP'), ('', 'إسرائ…	['Conflicting Emotions Detected']	مرصد اورومتوسط حقوق انس لسط شهيد مفقود جريح يوم ال جريم اباد جماع اسراييل بحق قطاع غز اسراييل ارتكب جرايم حرب مروع ضح معدل لسط قطاع يوم احصاء دمو تاريخ حديث حروب ضحا غز مدن طفل امرء عامل مجال الصح عناصر دفاع مدن صحاف مليو لسط نزحو قسر منازل مناطق سكن قطاع توفر ملجء امن نسب اجمال السك اسراييل تتعمد تدمير الحاق اضرار جسيم مرافق البن تحت قطاع غز جعل منطق صالح السك هجم تستث مرافق الصح مدارس مساجد ناي…		Humanitarian		Israeli-Palestinian Conflict		Real
وزارة المياه ارتفاع معدل الهطول المطري وتخزين السدود الأردن	Environment	Water Management	Real		Environment	Local	Real	وزارة المياه ارتفاع معدل الهطول المطري وتخزين السدود الأردن	[('', 'وزارة/NN'), ('', 'المياه/DTNN'), ('', 'ارتفاع/NN'), ('', 'معدل/NN'), ('', 'الهطول/DTNN'), ('', 'المطري/DTJJ'), ('', 'وتخزين/NNS'), ('', 'السدود/DTNN'), ('', 'الأردن/DTJJ'), ('', 'التلفزيون/DTNN'), ('', 'الأردني/DTJJ')]	['حزن']	زار مياه ارتفاع معدل هطول مطر تخز سدود ارد تلفز اردن		Environment		Water Management		Real
حماس الاحتلال استهدف فريقا من شركة الاتصالات أثناء العمل لإصلاح الخطوط بخان يونس رغم حصوله على تنسيق مسبق القصف الإسرائيلي أدى إلى استشهاد اثنين من موظفي شركة الاتصالات الفلسطينية في جريمة حرب بشعة الأردن غزة	Politics	Israeli-Palestinian Conflict	Real		Politics	Local	Real	حماس الاحتلال استهدف فريقا من شركة الاتصالات أثناء العمل لإصلاح الخطوط بخان يونس رغم حصوله على تنسيق مسبق القصف الإسرائيلي أدى إلى استشهاد اثنين من موظفي شركة الاتصالات الفلسطينية في جريمة حرب بشعة الأردن غزة	[('', 'حماس/NNP'), ('', 'الاحتلال/DTNN'), ('', 'استهدف/VBD'), ('', 'فريقا/NN'), ('', 'من/IN'), ('', 'شركة/NN'), ('', 'الاتصالات/DTNNS'), ('', 'أثناء/NN'), ('', 'العمل/DTNN'), ('', 'لإصلاح/NN'), ('', 'الخطوط/DTNN'), ('', 'بخان/NNP'), ('', 'يونس/NNP'), ('', 'رغم/NN'), ('', 'حصوله/NN'), ('', 'على/IN'), ('', 'تنسيق/NN'), ('', 'مسبق/JJ'), ('', 'القصف/DTNN'), ('', 'الإسرائيلي/DTJJ'), ('', 'أدى/VBD'), (…	['اشمئزاز']	حماس احتلال استهدف ريق شرك اتصال اثناء عمل اصلاح خطوط بخا يونس رغم حصول تنسيق مسبق قصف اسراييل ادى استشهاد موظف شرك اتصال فلسطين جريم حرب بشع ارد تلفز اردن غز		Politics		Israeli-Palestinian Conflict		Real
مطبخ يوم جديد الأحد	Media	Cook	Real		Media	Local	Real	مطبخ يوم جديد الأحد	[('', 'مطبخ/NN'), ('', 'يوم/NN'), ('', 'جديد/JJ'), ('', 'الأحد/DTNN'), ('', 'الأردن/DTJJ'), ('', 'التلفزيون/DTNN'), ('', 'الأردني/DTJJ')]	['No Emotion Detected']	مطبخ يوم جديد احد ارد تلفز اردن		Media		Cook		Real
استمرار انقطاع خدمات الاتصالات والإنترنت عن قطاع غزة لليوم الثالث على التوالي الأردن	Communication	International	Real		Communication	Local	Real	استمرار انقطاع خدمات الاتصالات والإنترنت عن قطاع غزة لليوم الثالث على التوالي الأردن	[('', 'استمرار/NN'), ('', 'انقطاع/NN'), ('', 'خدمات/NNS'), ('', 'الاتصالات/DTNNS'), ('', 'والإنترنت/NN'), ('', 'عن/IN'), ('', 'قطاع/NN'), ('', 'غزة/NNP'), ('', 'لليوم/NNP'), ('الثالث/ADJ', 'NUM'), ('', 'على/IN'), ('', 'التوالي/DTNN'), ('', 'الأردن/DTJJ'), ('', 'التلفزيون/DTNN'), ('', 'الأردني/DTJJ')]	['No Emotion Detected']	استمرار انقطاع خدم اتصال انترن قطاع غز يوم ثالث توال ارد تلفز اردن		Communication		International		Real
دعت الادارات المرورية جميع السائقين الى ضرورة أخذ المزيد من الحيطة والحذر خاصة في ظل هطول المطر او تواجد الضباب تجنبا لوقوع حوادث الانزلاق او فقدان السيطرة على المركبة الأردن	Weather	Natural Disasters	Real		Weather	Local	Real	دعت الادارات المرورية جميع السائقين الى ضرورة أخذ المزيد من الحيطة والحذر خاصة في ظل هطول المطر او تواجد الضباب تجنبا لوقوع حوادث الانزلاق او فقدان السيطرة على المركبة الأردن	[('', 'دعت/VBD'), ('', 'الادارات/DTNNS'), ('', 'المرورية/DTJJ'), ('جميع/NOUN', 'QUANT'), ('', 'السائقين/DTNNS'), ('', 'الى/IN'), ('', 'ضرورة/NN'), ('', 'أخذ/NN'), ('', 'المزيد/DTNN'), ('', 'من/IN'), ('', 'الحيطة/DTNN'), ('', 'والحذر/NN'), ('', 'خاصة/JJ'), ('', 'في/IN'), ('', 'ظل/NN'), ('', 'هطول/NN'), ('', 'المطر/DTNN'), ('', 'او/CC'), ('', 'تواجد/NN'), ('', 'الضباب/DTNN'), ('', 'تجنبا/NN'), ('',…	['حزن']	دعت ادار مرور سايق الى ضرور مزيد حيط حذر ظل هطول مطر او تواجد ضباب تجنب وقوع حوادث انزلاق او قدا سيطر مركب ارد تلفز اردن		Weather		Natural Disasters		Real
أجواء باردة وغائمة في أغلب مناطق المملكة محمد الخالدي إدارة الأرصاد الجوية الأردن يوم جديد الطقس	Weather	Forecast	Real		Weather	Local	Real	أجواء باردة وغائمة في أغلب مناطق المملكة محمد الخالدي إدارة الأرصاد الجوية الأردن يوم جديد الطقس	[('', 'أجواء/NN'), ('', 'باردة/JJ'), ('', 'وغائمة/JJ'), ('', 'في/IN'), ('', 'أغلب/NN'), ('', 'مناطق/NN'), ('', 'المملكة/DTNN'), ('', 'محمد/NNP'), ('', 'الخالدي/DTNNP'), ('', 'إدارة/NN'), ('', 'الأرصاد/DTNN'), ('', 'الجوية/DTJJ'), ('', 'الأردن/DTJJ'), ('', 'التلفزيون/DTNN'), ('', 'الأردني/DTJJ'), ('', 'يوم/NN'), ('', 'جديد/JJ'), ('', 'الطقس/DTNN')]	['حزن']	اجواء ارد غايم اغلب مناطق مملك محمد خالد ادار ارصاد الجو ارد تلفز اردن يوم جديد طقس		Weather		Forecast		Real
تناقش اللجنة المالية النيابية اليوم الأحد قانون الموازنة العامة لسنة حيث تناقش موازنة سلطة منطقة العقبة الاقتصادية الخاصة والشركات التابعة لها وسلطة إقليم البترا التنموي السياحي كما تناقش اللجنة موازنة وزارة الداخلية ودائرة الأحوال المدنية والجوازات ومديرية في المقابل تناقش لجنة التوجيه الوطني والإعلام دور الجامعات الأردنية بالتوجيه الوطني والإعلام فيما تناقش لحنة العمل والتنمية الاجتماعية والسكا…	Economy	Financial Policies	Real		Economy	Local	Real	تناقش اللجنة المالية النيابية اليوم الأحد قانون الموازنة العامة لسنة حيث تناقش موازنة سلطة منطقة العقبة الاقتصادية الخاصة والشركات التابعة لها وسلطة إقليم البترا التنموي السياحي كما تناقش اللجنة موازنة وزارة الداخلية ودائرة الأحوال المدنية والجوازات ومديرية في المقابل تناقش لجنة التوجيه الوطني والإعلام دور الجامعات الأردنية بالتوجيه الوطني والإعلام فيما تناقش لحنة العمل والتنمية الاجتماعية والسكا…	[('', 'تناقش/VBN'), ('', 'اللجنة/DTNN'), ('', 'المالية/DTJJ'), ('', 'النيابية/DTJJ'), ('', 'اليوم/DTNN'), ('', 'الأحد/DTNN'), ('', 'قانون/NN'), ('', 'الموازنة/DTNN'), ('', 'العامة/DTJJ'), ('', 'لسنة/NNP'), ('', 'حيث/WRB'), ('', 'تناقش/VBN'), ('', 'موازنة/NN'), ('', 'سلطة/NN'), ('', 'منطقة/NN'), ('', 'العقبة/DTNN'), ('', 'الاقتصادية/DTJJ'), ('', 'الخاصة/DTJJ'), ('', 'والشركات/NNP'), ('', 'التابعة/…	['Conflicting Emotions Detected']	تناقش لجن مال نياب يوم احد قانو موازن عام لسن تناقش موازن سلط منطق عقب اقتصاد خاص شرك تابع سلط اقليم البت تنمو سياح تناقش لجن موازن زار داخل داير احوال مدن جواز مدير امن عام مقابل تناقش لجن توجيه وطن اعلام دور جامع اردن توجيه وطن اعلام تناقش لحن عمل تنم اجتماع والسك معيق تواج اصحاب مكاتب استقدم عمال محافظ عقب مشروع قانو تنم اجتماع لسن ارد تلفز اردن		Economy		Financial Policies		Real
تكون الأجواء اليوم الأحد باردة في أغلب المناطق وغائمة جزئياً إلى غائمة ويتوقع هطول زخات خفيفة إلى متوسطة من المطر في أجزاء من المناطق الشمالية والوسطى والجنوبية الغربية من المملكة وتكون الرياح غربية معتدلة السرعة تنشط على فترات وتحذر إدارة الأرصاد الجوية في تقريرها من خطر تدني مدى الرؤية الأفقية بسبب الضباب فوق المرتفعات الجبلية وبعض مناطق البادية والسهول ومن خطر الإنزلاق على الطرقات في المناطق ا…	Weather	Forecast	Real		Weather	Local	Real	تكون الأجواء اليوم الأحد باردة في أغلب المناطق وغائمة جزئياً إلى غائمة ويتوقع هطول زخات خفيفة إلى متوسطة من المطر في أجزاء من المناطق الشمالية والوسطى والجنوبية الغربية من المملكة وتكون الرياح غربية معتدلة السرعة تنشط على فترات وتحذر إدارة الأرصاد الجوية في تقريرها من خطر تدني مدى الرؤية الأفقية بسبب الضباب فوق المرتفعات الجبلية وبعض مناطق البادية والسهول ومن خطر الإنزلاق على الطرقات في المناطق ا…	[('', 'تكون/VBP'), ('', 'الأجواء/DTNN'), ('', 'اليوم/DTNN'), ('', 'الأحد/DTNN'), ('', 'باردة/JJ'), ('', 'في/IN'), ('', 'أغلب/NN'), ('', 'المناطق/DTNN'), ('', 'وغائمة/NN'), ('', 'جزئيا/NN'), ('', 'إلى/NN'), ('', 'غائمة/JJ'), ('', 'ويتوقع/NN'), ('', 'هطول/NN'), ('', 'زخات/NNS'), ('', 'خفيفة/JJ'), ('', 'إلى/VBD'), ('', 'متوسطة/NN'), ('', 'من/IN'), ('', 'المطر/DTNN'), ('', 'في/IN'), ('', 'أجزاء/NN'),…	['Conflicting Emotions Detected']	تكو اجواء يوم احد ارد اغلب مناطق غايم جزء غايم يتوقع هطول زخا خفيف متوسط مطر اجزاء مناطق شمال وسطى جنوب غرب مملك تكو رياح غرب معتدل سرع تنشط فتر تحذر ادار ارصاد الجو تقرير خطر تدن مدى الرء افق سبب ضباب مرتفع جبل بعض مناطق باد سهول خطر انزلاق طرق مناطق تشهد هطول مطر حسب تقرير تبقى اجواء يوم غد اثن ارد غايم جزء اغلب مناطق احتمال هطول زخا خفيف مطر مملك تكو رياح جنوب غرب معتدل سرع يطرء ثلاثاء ارتفاع …		Weather		Forecast		Real
الخارجية المصرية لم نمنع أو نعطل دخول أية شاحنات لقطاع غزة أكدت وزارة الخارجية المصرية أن الجميع يدرك أن مصر لم تمنع أو تعطل دخول أي شاحنات لقطاع غزة وأوضح المتحدث باسم وزارة الخارجية السفير أحمد أبو زيد خلال تصريحات إعلامية أن هناك عراقيل كثيرة من الجانب الإسرائيلي سواء بدخول المساعدات أو دخول المصابين إلى مصر لتلقى علاجهم وأضاف أبو زيد إن معبر رفح مفتوح بصورة دائمة ومصر تقدم كل التسهيلات لدخول …	Humanitarian	Aid	Real		Humanitarian	Local	Real	الخارجية المصرية لم نمنع أو نعطل دخول أية شاحنات لقطاع غزة أكدت وزارة الخارجية المصرية أن الجميع يدرك أن مصر لم تمنع أو تعطل دخول أي شاحنات لقطاع غزة وأوضح المتحدث باسم وزارة الخارجية السفير أحمد أبو زيد خلال تصريحات إعلامية أن هناك عراقيل كثيرة من الجانب الإسرائيلي سواء بدخول المساعدات أو دخول المصابين إلى مصر لتلقى علاجهم وأضاف أبو زيد إن معبر رفح مفتوح بصورة دائمة ومصر تقدم كل التسهيلات لدخول …	[('', 'الخارجية/DTNN'), ('', 'المصرية/DTJJ'), ('', 'لم/RP'), ('', 'نمنع/VBP'), ('', 'أو/NN'), ('', 'نعطل/VBP'), ('', 'دخول/NN'), ('', 'أية/NN'), ('', 'شاحنات/NNS'), ('', 'لقطاع/NN'), ('', 'غزة/NNP'), ('', 'أكدت/VBD'), ('', 'وزارة/NN'), ('', 'الخارجية/DTNN'), ('', 'المصرية/DTJJ'), ('', 'أن/NNP'), ('الجميع/NOUN', 'QUANT'), ('', 'يدرك/VBP'), ('', 'أن/NN'), ('', 'مصر/NNP'), ('', 'لم/RP'), ('', 'تمنع/…	['Conflicting Emotions Detected']	خارج مصر نمنع نعطل دخول اي شاحن قطاع غز اكد زار خارج مصر جميع يدر مصر تمنع تعطل دخول شاحن قطاع غز اوضح متحدث اسم زار خارج سفير احمد زيد خلال تصريح اعلام عراقيل كثير جانب اسراييل سواء دخول مساعد دخول مصاب مصر تلقى علاج اضاف زيد معبر رفح مفتوح صور دايم مصر تقدم تسهيل دخول مساعد انسان قطاع غز يمك مزايد تشكيك امر ونو مسوول زارو معبر رفح تاكد دور مصر تسهيل دخول مساعد انسان مقدم قطاع غز		Humanitarian		Aid		Real
متظاهرون متضامنون مع الأسرى الإسرائيليين يغلقون شارعا رئيسيا بتل أبيب لأول مرة منذ بدء الاحتجاج	Society	International	Real		Society	Local	Real	متظاهرون متضامنون مع الأسرى الإسرائيليين يغلقون شارعا رئيسيا بتل أبيب لأول مرة منذ بدء الاحتجاج	[('', 'متظاهرون/NNS'), ('', 'متضامنون/JJ'), ('', 'مع/NN'), ('', 'الأسرى/DTNN'), ('', 'الإسرائيليين/DTJJ'), ('', 'يغلقون/VBP'), ('', 'شارعا/NN'), ('', 'رئيسيا/JJ'), ('', 'بتل/NN'), ('', 'أبيب/NN'), ('', 'لأول/NNP'), ('', 'مرة/NN'), ('', 'منذ/IN'), ('', 'بدء/NN'), ('', 'الاحتجاج/DTNN')]	['حزن']	متظاهر متضامن اسرى اسراييل يغلق شارع رييس بتل ابيب لاول مر بدء احتجاج		Society		International		Real
نشرة الأخبار السبت	Media	News	Real		Media	Local	Real	نشرة الأخبار السبت	[('', 'نشرة/NN'), ('', 'الأخبار/DTNN'), ('', 'السبت/DTNN'), ('', 'الأردن/DTJJ'), ('', 'التلفزيون/DTNN'), ('', 'الأردني/DTJJ')]	['اشمئزاز']	نشر اخبار الس ارد تلفز اردن		Media		News		Real
من الميدان الشركة الوطنية للتشغيل والتدريب نشامى الوطن الأردن	Society	Local	Real		Society	Local	Real	من الميدان الشركة الوطنية للتشغيل والتدريب نشامى الوطن الأردن	[('', 'من/IN'), ('', 'الميدان/DTNN'), ('', 'الشركة/DTNN'), ('', 'الوطنية/DTJJ'), ('', 'للتشغيل/NNP'), ('', 'والتدريب/NNP'), ('', 'نشامى/NNP'), ('', 'الوطن/DTNN'), ('', 'الأردن/DTJJ'), ('', 'التلفزيون/DTNN'), ('', 'الأردني/DTJJ')]	['اشمئزاز']	ميد شرك وطن تشغيل تدريب نشامى وطن ارد تلفز اردن		Society		Local		Real
نيويورك تايمز عن مسؤولين أمريكيين جماعة الحوثي لا تزال تحتفظ بنحو أرباع قدرتها على إطلاق الصواريخ والمسيرات نيويورك تايمز عن مسؤولين أمريكيين ثبت أن العثور على أهداف للحوثيين أكثر صعوبة مما كان متوقعا	Military	USA issues	Real		Military	Local	Real	نيويورك تايمز عن مسؤولين أمريكيين جماعة الحوثي لا تزال تحتفظ بنحو أرباع قدرتها على إطلاق الصواريخ والمسيرات نيويورك تايمز عن مسؤولين أمريكيين ثبت أن العثور على أهداف للحوثيين أكثر صعوبة مما كان متوقعا	[('', 'نيويورك/NNP'), ('', 'تايمز/NNP'), ('', 'عن/IN'), ('', 'مسؤولين/NNS'), ('', 'أمريكيين/JJ'), ('', 'جماعة/NN'), ('', 'الحوثي/DTNNP'), ('', 'لا/RP'), ('', 'تزال/VBP'), ('', 'تحتفظ/VBP'), ('', 'بنحو/NNP'), ('', 'أرباع/NN'), ('', 'قدرتها/NN'), ('', 'على/IN'), ('', 'إطلاق/NN'), ('', 'الصواريخ/DTNN'), ('', 'والمسيرات/NNS'), ('', 'نيويورك/NNP'), ('', 'تايمز/NNP'), ('', 'عن/IN'), ('', 'مسؤولين/NNS')…	['Conflicting Emotions Detected']	نيويور تايمز مسوول امريك جماع حوث تزال تحتفظ بنح ارباع قدر اطلاق صواريخ مسير نيويور تايمز مسوول امريك ثبت عثور اهداف حوث صعوب متوقع		Military		USA issues		Real
قضايا وآراء قسم الإستقلاب في الخدمات الطبية الملكية المقدم الطبيب مؤمن العقيل رئيس قسم الإستقلاب في الخدمات الطبية الملكية نشامى الوطن الأردن	Health	Local	Real		Health	Local	Real	قضايا وآراء قسم الإستقلاب في الخدمات الطبية الملكية المقدم الطبيب مؤمن العقيل رئيس قسم الإستقلاب في الخدمات الطبية الملكية نشامى الوطن الأردن	[('', 'قضايا/NN'), ('', 'وآراء/JJ'), ('', 'قسم/NN'), ('', 'الإستقلاب/DTNN'), ('', 'في/IN'), ('', 'الخدمات/DTNNS'), ('', 'الطبية/DTJJ'), ('', 'الملكية/DTJJ'), ('', 'المقدم/DTJJ'), ('', 'الطبيب/DTNN'), ('', 'مؤمن/VN'), ('', 'العقيل/DTNN'), ('', 'رئيس/NN'), ('', 'قسم/NN'), ('', 'الإستقلاب/DTNN'), ('', 'في/IN'), ('', 'الخدمات/DTNNS'), ('', 'الطبية/DTJJ'), ('', 'الملكية/DTJJ'), ('', 'نشامى/VBP'), ('',…	['No Emotion Detected']	قضا اراء قسم استقلاب خدم الطب ملك مقدم طبيب موم عقيل رييس قسم استقلاب خدم الطب ملك نشامى وطن ارد تلفز اردن		Health		Local		Real
حزب الميثاق الوطني يؤكد على دور الأردن في الدفاع عن القضية الفلسطينية الأردن غزة	Politics	International	Real		Politics	Local	Real	حزب الميثاق الوطني يؤكد على دور الأردن في الدفاع عن القضية الفلسطينية الأردن غزة	[('', 'حزب/NN'), ('', 'الميثاق/DTNN'), ('', 'الوطني/DTJJ'), ('', 'يؤكد/VBP'), ('', 'على/IN'), ('', 'دور/NN'), ('', 'الأردن/DTNN'), ('', 'في/IN'), ('', 'الدفاع/DTNN'), ('', 'عن/IN'), ('', 'القضية/DTNN'), ('', 'الفلسطينية/DTJJ'), ('', 'الأردن/DTJJ'), ('', 'التلفزيون/DTNN'), ('', 'الأردني/DTJJ'), ('', 'غزة/NNP')]	['No Emotion Detected']	حزب ميثاق وطن يوكد دور ارد دفاع القض فلسطين ارد تلفز اردن غز		Politics		International		Real
أ ف ب عن مصادر ضربة جديدة تستهدف الحديدة غربي اليمن ردا على صاروخ أطلقه الحوثيون انطلاقا من المدينة مصادر محلية في محافظة الحديدة الطيران الأمريكي استهدف مواقع تابعة لأنصار الله الحوثيين في المحافظة	Military	USA issues	Real		Military	Local	Real	أ ف ب عن مصادر ضربة جديدة تستهدف الحديدة غربي اليمن ردا على صاروخ أطلقه الحوثيون انطلاقا من المدينة مصادر محلية في محافظة الحديدة الطيران الأمريكي استهدف مواقع تابعة لأنصار الله الحوثيين في المحافظة	[('', 'أ/NN'), ('', 'ف/NN'), ('', 'ب/NN'), ('', 'عن/IN'), ('', 'مصادر/NN'), ('', 'ضربة/NN'), ('', 'جديدة/JJ'), ('', 'تستهدف/VBP'), ('', 'الحديدة/DTNNP'), ('', 'غربي/JJ'), ('', 'اليمن/DTNNP'), ('', 'ردا/NN'), ('', 'على/IN'), ('', 'صاروخ/NN'), ('', 'أطلقه/NN'), ('', 'الحوثيون/DTNNS'), ('', 'انطلاقا/NN'), ('', 'من/IN'), ('', 'المدينة/DTNN'), ('', 'مصادر/NN'), ('', 'محلية/JJ'), ('', 'في/IN'), ('', 'م…	['غضب']	مصادر ضرب جديد تستهدف حديد غرب يمن ردا صاروخ اطلق حوث انطلاق مدين مصادر محل محافظ حديد طير امريك استهدف مواقع تابع انصار الله حوث محافظ		Military		USA issues		Real
جيش الاحتلال مقتل أحد جنودنا أمس في المعارك الدائرة وسط قطاع غزة جيش الاحتلال إصابة ضابطين وجندي بجروح خطيرة في المعارك الدائرة بقطاع غزة	Politics	Israeli-Palestinian Conflict	Real		Politics	Local	Real	جيش الاحتلال مقتل أحد جنودنا أمس في المعارك الدائرة وسط قطاع غزة جيش الاحتلال إصابة ضابطين وجندي بجروح خطيرة في المعارك الدائرة بقطاع غزة	[('', 'جيش/NN'), ('', 'الاحتلال/DTNN'), ('', 'مقتل/NN'), ('', 'أحد/NN'), ('', 'جنودنا/NN'), ('', 'أمس/NN'), ('', 'في/IN'), ('', 'المعارك/DTNN'), ('', 'الدائرة/DTJJ'), ('', 'وسط/NN'), ('', 'قطاع/NN'), ('', 'غزة/NNP'), ('', 'جيش/NN'), ('', 'الاحتلال/DTNN'), ('', 'إصابة/NN'), ('', 'ضابطين/NNS'), ('', 'وجندي/JJ'), ('', 'بجروح/NN'), ('', 'خطيرة/JJ'), ('', 'في/IN'), ('', 'المعارك/DTNN'), ('', 'الدائرة/…	['Conflicting Emotions Detected']	جيش احتلال مقتل جنود معارك داير وسط قطاع غز جيش احتلال اصاب ضابط جند جروح خطير معارك داير قطاع غز		Politics		Israeli-Palestinian Conflict		Real
ندوة حوارية في اربد حول الموقف الأردني في تعزيز الصمود الفلسطيني غزة الأردن	Society	Local	Real		Society	Local	Real	ندوة حوارية في اربد حول الموقف الأردني في تعزيز الصمود الفلسطيني غزة الأردن	[('', 'ندوة/NN'), ('', 'حوارية/JJ'), ('', 'في/IN'), ('', 'اربد/NN'), ('', 'حول/NN'), ('', 'الموقف/DTNN'), ('', 'الأردني/DTJJ'), ('', 'في/IN'), ('', 'تعزيز/NN'), ('', 'الصمود/DTNN'), ('', 'الفلسطيني/DTJJ'), ('', 'غزة/NNP'), ('', 'الأردن/DTNNP'), ('', 'التلفزيون/DTNN'), ('', 'الأردني/DTJJ')]	['حزن']	ندو حوار اربد حول موقف اردن تعزيز صمود فلسطين غز ارد تلفز اردن		Society		Local		Real
القسام فقدنا الاتصال بخلية مسؤولة عن من الأسرى بالقطاع منذ عام غزة	Politics	Israeli-Palestinian Conflict	Real		Politics	Local	Real	القسام فقدنا الاتصال بخلية مسؤولة عن من الأسرى بالقطاع منذ عام غزة	[('', 'القسام/DTNNP'), ('', 'فقدنا/VBD'), ('', 'الاتصال/DTNN'), ('', 'بخلية/NN'), ('', 'مسؤولة/JJ'), ('', 'عن/IN'), ('', 'من/IN'), ('', 'الأسرى/DTNN'), ('', 'بالقطاع/NNP'), ('', 'منذ/IN'), ('', 'عام/NN'), ('', 'غزة/NNP'), ('', 'التلفزيون/DTNN'), ('', 'الأردني/DTJJ')]	['No Emotion Detected']	قسام فقد اتصال بخل مسوول اسرى قطاع عام غز تلفز اردن		Politics		Israeli-Palestinian Conflict		Real
وزير الصحة يفتتح الرنين المغناطيسي وتوسعة غسيل الكلى ومركز أسنان في مستشفى النديم الأردن	Health	Medical Services	Real		Health	Local	Real	وزير الصحة يفتتح الرنين المغناطيسي وتوسعة غسيل الكلى ومركز أسنان في مستشفى النديم الأردن	[('', 'وزير/NN'), ('', 'الصحة/DTNN'), ('', 'يفتتح/VBP'), ('', 'الرنين/DTNNS'), ('', 'المغناطيسي/DTJJ'), ('', 'وتوسعة/NN'), ('', 'غسيل/NN'), ('', 'الكلى/DTNN'), ('', 'ومركز/NN'), ('', 'أسنان/NNS'), ('', 'في/IN'), ('', 'مستشفى/NN'), ('', 'النديم/DTNN'), ('', 'الأردن/DTJJ'), ('', 'التلفزيون/DTNN'), ('', 'الأردني/DTJJ')]	['حزن']	زير الصح يفتتح الرن مغناطيس توسع غسيل كلى مركز اسنا مستشفى نديم ارد تلفز اردن		Health		Medical Services		Real
الجمعية الأردنية للعلوم والثقافة تعقد محاضرة حول موازنة عام	Economy	Local	Real		Economy	Local	Real	الجمعية الأردنية للعلوم والثقافة تعقد محاضرة حول موازنة عام	[('', 'الجمعية/DTNN'), ('', 'الأردنية/DTJJ'), ('', 'للعلوم/NNP'), ('', 'والثقافة/NN'), ('', 'تعقد/VBN'), ('', 'محاضرة/NN'), ('', 'حول/NN'), ('', 'موازنة/NN'), ('', 'عام/NN'), ('', 'الأردن/DTNN'), ('', 'التلفزيون/DTNN'), ('', 'الأردني/DTJJ')]	['No Emotion Detected']	جمع اردن علوم ثقاف تعقد محاضر حول موازن عام ارد تلفز اردن		Economy		Local		Real
نشرة الأخبار المحلية السبت	Media	News	Real		Media	Local	Real	نشرة الأخبار المحلية السبت	[('', 'نشرة/NN'), ('', 'الأخبار/DTNN'), ('', 'المحلية/DTJJ'), ('', 'السبت/DTNN'), ('', 'الأردن/DTJJ'), ('', 'التلفزيون/DTNN'), ('', 'الأردني/DTJJ')]	['اشمئزاز']	نشر اخبار محل الس ارد تلفز اردن		Media		News		Real
تظاهرات حاشدة في لندن تنديداً بحرب الإبادة على قطاع غزة الأردن	Society	International	Real		Society	Local	Real	تظاهرات حاشدة في لندن تنديداً بحرب الإبادة على قطاع غزة الأردن	[('', 'تظاهرات/NNS'), ('', 'حاشدة/JJ'), ('', 'في/IN'), ('', 'لندن/NNP'), ('', 'تنديدا/NN'), ('', 'بحرب/NN'), ('', 'الإبادة/DTNN'), ('', 'على/IN'), ('', 'قطاع/NN'), ('', 'غزة/NNP'), ('', 'الأردن/DTNNP'), ('', 'التلفزيون/DTNN'), ('', 'الأردني/DTJJ')]	['غضب']	تظاهر حاشد لند تنديد حرب اباد قطاع غز ارد تلفز اردن		Society		International		Real
مظاهرة في كوبنهاجن الدنماركية دعماً لفلسطين وللمطالبة بوقف الحرب على قطاع غزة الأردن	Society	International	Real		Society	Local	Real	مظاهرة في كوبنهاجن الدنماركية دعماً لفلسطين وللمطالبة بوقف الحرب على قطاع غزة الأردن	[('', 'مظاهرة/NN'), ('', 'في/IN'), ('', 'كوبنهاجن/NNP'), ('', 'الدنماركية/DTJJ'), ('', 'دعما/NN'), ('', 'لفلسطين/NNS'), ('', 'وللمطالبة/JJ'), ('', 'بوقف/NN'), ('', 'الحرب/DTNN'), ('', 'على/IN'), ('', 'قطاع/NN'), ('', 'غزة/NNP'), ('', 'الأردن/DTNNP'), ('', 'التلفزيون/DTNN'), ('', 'الأردني/DTJJ')]	['No Emotion Detected']	مظاهر وبنهاج دنمارك دعم فلسط مطالب وقف حرب قطاع غز ارد تلفز اردن		Society		International		Real
شهيدا جراء تواصل الغارات والقصف المدفعي الإسرائيلي على خان يونس جنوبي قطاع غزة	Politics	Israeli-Palestinian Conflict	Real		Politics	Local	Real	شهيدا جراء تواصل الغارات والقصف المدفعي الإسرائيلي على خان يونس جنوبي قطاع غزة	[('', 'شهيدا/NN'), ('', 'جراء/NN'), ('', 'تواصل/NN'), ('', 'الغارات/DTNNS'), ('', 'والقصف/NNP'), ('', 'المدفعي/DTJJ'), ('', 'الإسرائيلي/DTJJ'), ('', 'على/IN'), ('', 'خان/NN'), ('', 'يونس/NNP'), ('', 'جنوبي/NN'), ('', 'قطاع/NN'), ('', 'غزة/NNP')]	['No Emotion Detected']	شهيد جراء تواصل غار قصف مدفع اسراييل خان يونس جنوب قطاع غز		Politics		Israeli-Palestinian Conflict		Real
سياح الأردن من أكثر الوجهات السياحية الآمنة	Tourism	Promotion	Real		Tourism	Local	Real	سياح الأردن من أكثر الوجهات السياحية الآمنة	[('', 'سياح/NN'), ('', 'الأردن/DTNN'), ('', 'من/IN'), ('', 'أكثر/NN'), ('', 'الوجهات/DTNNS'), ('', 'السياحية/DTJJ'), ('', 'الآمنة/DTJJ'), ('', 'التلفزيون/DTNN'), ('', 'الأردني/DTJJ')]	['حزن']	سياح ارد وجه سياح امن تلفز اردن		Tourism		Promotion		Real
افتتاح فرع لحزب الميثاق الوطني في محافظة العقبة	Society	Local	Real		Society	Local	Real	افتتاح فرع لحزب الميثاق الوطني في محافظة العقبة	[('', 'افتتاح/NN'), ('', 'فرع/NN'), ('', 'لحزب/NN'), ('', 'الميثاق/DTNN'), ('', 'الوطني/DTJJ'), ('', 'في/IN'), ('', 'محافظة/NN'), ('', 'العقبة/DTNNP'), ('', 'التلفزيون/DTNN'), ('', 'الأردني/DTJJ')]	['غضب']	افتتاح فرع لحزب ميثاق وطن محافظ عقب تلفز اردن		Society		Local		Real
الشباب يشكلون من المنتسبين للأحزاب	Politics	Youth Empowerment	Real		Politics	Local	Real	الشباب يشكلون من المنتسبين للأحزاب	[('', 'الشباب/DTNN'), ('', 'يشكلون/VBP'), ('', 'من/IN'), ('', 'المنتسبين/DTJJ'), ('', 'للأحزاب/NN'), ('', 'التلفزيون/DTNN'), ('', 'الأردني/DTJJ')]	['خوف']	شباب يشكل منتسب احزاب تلفز اردن		Politics		Youth Empowerment		Real
متحدث باسم الحوثيين الضربات الأمريكية في اليمن لم يكن لها تأثير يذكر اتصال هاتفي د وليد أبو دلبوح أستاذ العلاقات الدولية	Military	USA issues	Real		Military	Local	Real	متحدث باسم الحوثيين الضربات الأمريكية في اليمن لم يكن لها تأثير يذكر اتصال هاتفي د وليد أبو دلبوح أستاذ العلاقات الدولية	[('', 'متحدث/NN'), ('', 'باسم/NNP'), ('', 'الحوثيين/DTJJ'), ('', 'الضربات/DTNNS'), ('', 'الأمريكية/DTJJ'), ('', 'في/IN'), ('', 'اليمن/DTNNP'), ('', 'لم/RP'), ('', 'يكن/VBP'), ('', 'لها/NN'), ('', 'تأثير/NN'), ('', 'يذكر/VBN'), ('', 'اتصال/NN'), ('', 'هاتفي/JJ'), ('', 'د/NN'), ('', 'وليد/NNP'), ('', 'أبو/NNP'), ('', 'دلبوح/NN'), ('', 'أستاذ/NN'), ('', 'العلاقات/DTNNS'), ('', 'الدولية/DTJJ')]	['No Emotion Detected']	متحدث اسم حوث ضرب امريك يمن يكن تاثير يذكر اتصال هاتف ليد دلبوح استاذ علاق دول		Military		USA issues		Real
اشتباكات بعد اقتحام الاحتلال مخيم الفارعة اتصال هاتفي نوال حجازي مراسلة	Politics	Israeli-Palestinian Conflict	Real		Politics	Local	Real	اشتباكات بعد اقتحام الاحتلال مخيم الفارعة اتصال هاتفي نوال حجازي مراسلة	[('', 'اشتباكات/NNS'), ('', 'بعد/NN'), ('', 'اقتحام/NN'), ('', 'الاحتلال/DTNN'), ('', 'مخيم/NN'), ('', 'الفارعة/DTNN'), ('', 'اتصال/NN'), ('', 'هاتفي/JJ'), ('', 'نوال/VBP'), ('', 'حجازي/NNP'), ('', 'مراسلة/NN'), ('', 'التلفزيون/DTNN'), ('', 'الأردني/DTJJ')]	['حزن']	اشتباك اقتحام احتلال مخيم فارع اتصال هاتف نوال حجاز مراسل تلفز اردن		Politics		Israeli-Palestinian Conflict		Real
اشتباكات بعد اقتحام الاحتلال مخيم الفارعة	Politics	Israeli-Palestinian Conflict	Real		Politics	Local	Real	اشتباكات بعد اقتحام الاحتلال مخيم الفارعة	[('', 'اشتباكات/NNS'), ('', 'بعد/NN'), ('', 'اقتحام/NN'), ('', 'الاحتلال/DTNN'), ('', 'مخيم/NN'), ('', 'الفارعة/DTNN'), ('', 'التلفزيون/DTNN'), ('', 'الأردني/DTJJ')]	['حزن']	اشتباك اقتحام احتلال مخيم فارع تلفز اردن		Politics		Israeli-Palestinian Conflict		Real
محكمة العدل الدولية تبدأ مداولاتها في الدعوة ضد إسرائيل	Law	International	Real		Law	Local	Real	محكمة العدل الدولية تبدأ مداولاتها في الدعوة ضد إسرائيل	[('', 'محكمة/NN'), ('', 'العدل/DTNN'), ('', 'الدولية/DTJJ'), ('', 'تبدأ/VBP'), ('', 'مداولاتها/NN'), ('', 'في/IN'), ('', 'الدعوة/DTNN'), ('', 'ضد/NN'), ('', 'إسرائيل/NN'), ('', 'التلفزيون/DTNN'), ('', 'الأردني/DTJJ')]	['No Emotion Detected']	محكم عدل دول تبدء مداول دعو ضد اسراييل تلفز اردن		Law		International		Real
عدد شهداء العدوان الإسرائيلي على غزة يتجاوز ألفا	Politics	Israeli-Palestinian Conflict	Real		Politics	Local	Real	عدد شهداء العدوان الإسرائيلي على غزة يتجاوز ألفا	[('', 'عدد/NN'), ('', 'شهداء/NN'), ('', 'العدوان/DTNN'), ('', 'الإسرائيلي/DTJJ'), ('', 'على/IN'), ('', 'غزة/NNP'), ('', 'يتجاوز/VBP'), ('', 'ألفا/NN'), ('', 'التلفزيون/DTNN'), ('', 'الأردني/DTJJ')]	['حزن']	عدد شهداء عدو اسراييل غز يتجاوز الف تلفز اردن		Politics		Israeli-Palestinian Conflict		Real
نـشـرة أخــبار الثالثة الـسبت	Media	News	Real		Media	Local	Real	نـشـرة أخــبار الثالثة الـسبت	[('', 'نـشـرة/NN'), ('', 'أخــبار/NN'), ('الثالثة/ADJ', 'NUM'), ('', 'الـسبت/DTNN'), ('', 'التلفزيون/DTNN'), ('', 'الأردني/DTJJ')]	['No Emotion Detected']	نشر اخبار ثالث الس تلفز اردن		Media		News		Real
مجلس محافظة المفرق يوصي بسرعة اتخاذ الإجراءات المطلوبة لإتمام المشاريع لتحسين واقع الخدمات	Environment	Infrastructure	Real		Environment	Local	Real	مجلس محافظة المفرق يوصي بسرعة اتخاذ الإجراءات المطلوبة لإتمام المشاريع لتحسين واقع الخدمات	[('', 'مجلس/NN'), ('', 'محافظة/NN'), ('', 'المفرق/DTNN'), ('', 'يوصي/VBP'), ('', 'بسرعة/NN'), ('', 'اتخاذ/NN'), ('', 'الإجراءات/DTNNS'), ('', 'المطلوبة/DTJJ'), ('', 'لإتمام/NN'), ('', 'المشاريع/DTNN'), ('', 'لتحسين/NNS'), ('', 'واقع/NN'), ('', 'الخدمات/DTNNS'), ('', 'التلفزيون/DTNN'), ('', 'الأردني/DTJJ')]	['Conflicting Emotions Detected']	مجلس محافظ مفرق يوص سرع اتخاذ اجراء مطلوب اتمام مشاريع لتحس واقع خدم تلفز اردن		Environment		Infrastructure		Real
وزارة الصحة في غزة ارتفاع حصيلة العدوان الإسـرائيـلي في قطاع غزة الى شهيد و اصابة منذ السابع من اكتوبر الماضي	Health	Israeli-Palestinian Conflict	Real		Health	Local	Real	وزارة الصحة في غزة ارتفاع حصيلة العدوان الإسـرائيـلي في قطاع غزة الى شهيد و اصابة منذ السابع من اكتوبر الماضي	[('', 'وزارة/NN'), ('', 'الصحة/DTNN'), ('', 'في/IN'), ('', 'غزة/NNP'), ('', 'ارتفاع/NN'), ('', 'حصيلة/NN'), ('', 'العدوان/DTNN'), ('', 'الإسـرائيـلي/DTJJ'), ('', 'في/IN'), ('', 'قطاع/NN'), ('', 'غزة/NNP'), ('', 'الى/IN'), ('', 'شهيد/NN'), ('', 'و/CC'), ('', 'اصابة/NN'), ('', 'منذ/IN'), ('السابع/ADJ', 'NUM'), ('', 'من/IN'), ('', 'اكتوبر/NN'), ('', 'الماضي/DTJJ'), ('', 'التلفزيون/DTNN'), ('', 'الأر…	['اشمئزاز']	زار الصح غز ارتفاع حصيل عدو اسراييل قطاع غز الى شهيد اصاب سابع اكتوبر ماض تلفز اردن		Health		Israeli-Palestinian Conflict		Real
غارات أميركية جديدة تستهدف منشأة رادار للحوثــيــيـن في اليمن اتصال هاتفي د طارق ابو هزيم أستاذ العلوم السياسية	Military	USA issues	Real		Military	Local	Real	غارات أميركية جديدة تستهدف منشأة رادار للحوثــيــيـن في اليمن اتصال هاتفي د طارق ابو هزيم أستاذ العلوم السياسية	[('', 'غارات/NNS'), ('', 'أميركية/JJ'), ('', 'جديدة/JJ'), ('', 'تستهدف/VBP'), ('', 'منشأة/JJ'), ('', 'رادار/NN'), ('', 'للحوثــيــيـن/NNP'), ('', 'في/IN'), ('', 'اليمن/DTNNP'), ('', 'اتصال/NN'), ('', 'هاتفي/JJ'), ('', 'د/NN'), ('', 'طارق/NNP'), ('', 'ابو/NNP'), ('', 'هزيم/NNP'), ('', 'أستاذ/NN'), ('', 'العلوم/DTNN'), ('', 'السياسية/DTJJ'), ('', 'التلفزيون/DTNN'), ('', 'الأردني/DTJJ')]	['Conflicting Emotions Detected']	غار اميرك جديد تستهدف منشء رادار حوث يمن اتصال هاتف طارق ابو هزيم استاذ علوم سياس تلفز اردن		Military		USA issues		Real
نـشـرة منتصف النهار الـسبت	Media	News	Real		Media	Local	Real	نـشـرة منتصف النهار الـسبت	[('', 'نـشـرة/NN'), ('', 'منتصف/NN'), ('', 'النهار/DTNN'), ('', 'الـسبت/DTJJ'), ('', 'التلفزيون/DTNN'), ('', 'الأردني/DTJJ')]	['No Emotion Detected']	نشر منتصف نهار الس تلفز اردن		Media		News		Real
الاحتلال ينفذ غارات بمحيط مستشفى شهداء الأقصى في غزة فلسطين الأردن	Politics	Israeli-Palestinian Conflict	Real		Politics	Local	Real	الاحتلال ينفذ غارات بمحيط مستشفى شهداء الأقصى في غزة فلسطين الأردن	[('', 'الاحتلال/DTNN'), ('', 'ينفذ/VBP'), ('', 'غارات/NNS'), ('', 'بمحيط/NN'), ('', 'مستشفى/NN'), ('', 'شهداء/NN'), ('', 'الأقصى/DTNN'), ('', 'في/IN'), ('', 'غزة/NNP'), ('', 'التلفزيون/DTNN'), ('', 'الأردني/DTJJ'), ('', 'فلسطين/NNP'), ('', 'الأردن/DTNNP')]	['حزن']	احتلال ينفذ غار محيط مستشفى شهداء اقصى غز تلفز اردن لسط ارد		Politics		Israeli-Palestinian Conflict		Real
مع دخول العدوان الإسرائيلي الهمجي على قطاع غزة يومه الـ عشرات الشهداء والجرحى بالمجازر الإسرائيلية المتواصلة على غزة	Politics	Israeli-Palestinian Conflict	Real		Politics	Local	Real	مع دخول العدوان الإسرائيلي الهمجي على قطاع غزة يومه الـ عشرات الشهداء والجرحى بالمجازر الإسرائيلية المتواصلة على غزة	[('', 'مع/NN'), ('', 'دخول/NN'), ('', 'العدوان/DTNN'), ('', 'الإسرائيلي/DTJJ'), ('', 'الهمجي/DTJJ'), ('', 'على/IN'), ('', 'قطاع/NN'), ('', 'غزة/NNP'), ('', 'يومه/VBP'), ('', 'الـ/DTNN'), ('', 'عشرات/NNS'), ('', 'الشهداء/DTNN'), ('', 'والجرحى/NNP'), ('', 'بالمجازر/NNP'), ('', 'الإسرائيلية/DTJJ'), ('', 'المتواصلة/DTJJ'), ('', 'على/IN'), ('', 'غزة/NNP'), ('', 'التلفزيون/DTNN'), ('', 'الأردني/DTJJ')]	['حزن']	دخول عدو اسراييل همج قطاع غز يوم ال عشر شهداء جرحى مجازر اسراييل متواصل غز تلفز اردن		Politics		Israeli-Palestinian Conflict		Real
مطبخ يوم جديد السبت	Media	Cook	Real		Media	Local	Real	مطبخ يوم جديد السبت	[('', 'مطبخ/NN'), ('', 'يوم/NN'), ('', 'جديد/JJ'), ('', 'السبت/DTNN'), ('', 'التلفزيون/DTNN'), ('', 'الأردني/DTJJ')]	['No Emotion Detected']	مطبخ يوم جديد الس تلفز اردن		Media		Cook		Real
المندوب الروسي لدى الأمم المتحدة الضربات الواسعة على أراضي اليمن ليست لها أي علاقة بممارسة حق الدفاع عن النفس حق الدفاع عن النفس لا يمكن ممارسته لضمان حرية الشحن والأمريكيون يعرفون ذلك جيدا	Politics	International	Real		Politics	Local	Real	المندوب الروسي لدى الأمم المتحدة الضربات الواسعة على أراضي اليمن ليست لها أي علاقة بممارسة حق الدفاع عن النفس حق الدفاع عن النفس لا يمكن ممارسته لضمان حرية الشحن والأمريكيون يعرفون ذلك جيدا	[('', 'المندوب/DTNN'), ('', 'الروسي/DTJJ'), ('', 'لدى/NN'), ('', 'الأمم/DTNN'), ('', 'المتحدة/DTJJ'), ('', 'الضربات/DTNNS'), ('', 'الواسعة/DTJJ'), ('', 'على/IN'), ('', 'أراضي/NNS'), ('', 'اليمن/DTNNP'), ('', 'ليست/VBD'), ('', 'لها/NN'), ('', 'أي/NN'), ('', 'علاقة/NN'), ('', 'بممارسة/JJ'), ('', 'حق/NN'), ('', 'الدفاع/DTNN'), ('', 'عن/IN'), ('', 'النفس/DTNN'), ('', 'حق/NN'), ('', 'الدفاع/DTNN'), ('…	['Conflicting Emotions Detected']	مندوب روس امم متحد ضرب واسع اراض يمن علاق ممارس حق دفاع نفس حق دفاع نفس يمك ممارس لضما حر شحن امريك يعرف جيد		Politics		International		Real
المندوب الفلسطيني لدى الأمم المتحدة أفضل طريقة لتجنب التصعيد الإقليمي هي العمل لوقف فوري لإطلاق النار في غزة المندوب الفلسطيني لدى الأمم المتحدة نشكر جنوب إفريقيا على قيادتها الأخلاقية في قضية اتهام إسرائيل بالإبادة	Politics	Israeli-Palestinian Conflict	Real		Politics	Local	Real	المندوب الفلسطيني لدى الأمم المتحدة أفضل طريقة لتجنب التصعيد الإقليمي هي العمل لوقف فوري لإطلاق النار في غزة المندوب الفلسطيني لدى الأمم المتحدة نشكر جنوب إفريقيا على قيادتها الأخلاقية في قضية اتهام إسرائيل بالإبادة	[('', 'المندوب/DTNN'), ('', 'الفلسطيني/DTJJ'), ('', 'لدى/NN'), ('', 'الأمم/DTNN'), ('', 'المتحدة/DTJJ'), ('', 'أفضل/VBD'), ('', 'طريقة/NN'), ('', 'لتجنب/NN'), ('', 'التصعيد/DTNN'), ('', 'الإقليمي/DTJJ'), ('', 'هي/PRP'), ('', 'العمل/DTNN'), ('', 'لوقف/NN'), ('', 'فوري/JJ'), ('', 'لإطلاق/NN'), ('', 'النار/DTNN'), ('', 'في/IN'), ('', 'غزة/NNP'), ('', 'المندوب/DTNN'), ('', 'الفلسطيني/DTJJ'), ('', 'لد…	['خوف']	مندوب فلسطين امم متحد افضل طريق تجنب تصعيد اقليم عمل لوقف فور اطلاق نار غز مندوب فلسطين امم متحد نشكر جنوب افريق قياد اخلاق قض اتهام اسراييل اباد		Politics		Israeli-Palestinian Conflict		Real
وسائل إعلام إسرائيلية إصابة قائد الكتيبة وقائد الكتيبة في معارك غزة	Politics	Israeli-Palestinian Conflict	Real		Politics	Local	Real	وسائل إعلام إسرائيلية إصابة قائد الكتيبة وقائد الكتيبة في معارك غزة	[('', 'وسائل/NN'), ('', 'إعلام/NN'), ('', 'إسرائيلية/JJ'), ('', 'إصابة/NN'), ('', 'قائد/NN'), ('', 'الكتيبة/DTNN'), ('', 'وقائد/NN'), ('', 'الكتيبة/DTNN'), ('', 'في/IN'), ('', 'معارك/NN'), ('', 'غزة/NNP')]	['غضب']	سايل اعلام اسراييل اصاب قايد كتيب قايد كتيب معار غز		Politics		Israeli-Palestinian Conflict		Real
وكيل الأمين العام للأمم المتحدة هجوم إسرائيل على غزة حرب تم شنها دون أي اعتبار لتأثيرها على المدنيين لا يزال الوضع مروعا في غزة مع استمرار العمليات العسكرية الإسرائيلية بلا هوادة انهيار النظام الصحي في غزة وخطر المجاعة يتزايد يوما بعد يوم مرافق الأمم المتحدة الحيوية للسكان المتبقين بغزة تتعرض لهجوم متواصل من الصعب تخيل أن الفلسطينيين سيعودون أو سيتمكنون من العودة إلى شمال غزة توسيع نطاق الهجوم إل…	Politics	Israeli-Palestinian Conflict	Real		Politics	Local	Real	وكيل الأمين العام للأمم المتحدة هجوم إسرائيل على غزة حرب تم شنها دون أي اعتبار لتأثيرها على المدنيين لا يزال الوضع مروعا في غزة مع استمرار العمليات العسكرية الإسرائيلية بلا هوادة انهيار النظام الصحي في غزة وخطر المجاعة يتزايد يوما بعد يوم مرافق الأمم المتحدة الحيوية للسكان المتبقين بغزة تتعرض لهجوم متواصل من الصعب تخيل أن الفلسطينيين سيعودون أو سيتمكنون من العودة إلى شمال غزة توسيع نطاق الهجوم إل…	[('', 'وكيل/NN'), ('', 'الأمين/DTNNS'), ('', 'العام/DTJJ'), ('', 'للأمم/NNP'), ('', 'المتحدة/DTJJ'), ('', 'هجوم/NN'), ('', 'إسرائيل/JJ'), ('', 'على/IN'), ('', 'غزة/NNP'), ('', 'حرب/NN'), ('', 'تم/VBD'), ('', 'شنها/NN'), ('', 'دون/NN'), ('', 'أي/NN'), ('', 'اعتبار/VBG'), ('', 'لتأثيرها/NN'), ('', 'على/IN'), ('', 'المدنيين/DTNNS'), ('', 'لا/RP'), ('', 'يزال/VBP'), ('', 'الوضع/DTNN'), ('', 'مروعا/VN…	['Conflicting Emotions Detected']	كيل الام عام امم متحد هجوم اسراييل غز حرب تم شنه اعتبار تاثير مدن يزال وضع مروع غز استمرار عمل عسكر اسراييل بلا هواد انهيار نظام الصح غز خطر مجاع يتزايد يوم يوم مرافق امم متحد حيو للسك متبق بغز تتعرض هجوم متواصل صعب تخيل فلسطين سيعود سيتمكن عود غز توسيع نطاق هجوم رفح يشكل تحد خطير عمل انسان متعثر فعل اسراييل تكثف قصف الجو مناطق طلب مدن انتقال ال بغز منزعج تصريح زراء اسراييل خصوص تشجيع انتقال سكا …		Politics		Israeli-Palestinian Conflict		Real
دور الشباب في الحزب الديمقراطي الإجتماعي الأردني محمد النخلة عضو في الحزب الديمقراطي الإجتماعي الأردني شباب وأحزاب الأردن	Politics	Youth Empowerment	Real		Politics	Local	Real	دور الشباب في الحزب الديمقراطي الإجتماعي الأردني محمد النخلة عضو في الحزب الديمقراطي الإجتماعي الأردني شباب وأحزاب الأردن	[('', 'دور/NN'), ('', 'الشباب/DTNN'), ('', 'في/IN'), ('', 'الحزب/DTNN'), ('', 'الديمقراطي/DTJJ'), ('', 'الإجتماعي/DTJJ'), ('', 'الأردني/DTJJ'), ('', 'محمد/NNP'), ('', 'النخلة/DTNNP'), ('', 'عضو/NN'), ('', 'في/IN'), ('', 'الحزب/DTNN'), ('', 'الديمقراطي/DTJJ'), ('', 'الإجتماعي/DTJJ'), ('', 'الأردني/DTJJ'), ('', 'شباب/NN'), ('', 'وأحزاب/NN'), ('', 'الأردن/DTNN'), ('', 'التلفزيون/DTNN'), ('', 'الاردن…	['No Emotion Detected']	دور شباب حزب ديمقراط اجتماع اردن محمد نخل عضو حزب ديمقراط اجتماع اردن شباب احزاب ارد تلفز اردن		Politics		Youth Empowerment		Real
بيان الدعجة المرأة ليست بعيدة عن العمل السياسي في الأردن بيان الدعجة عضو في الحزب الديمقراطي الإجتماعي الأردني شباب وأحزاب الأردن	Society	Women Issues	Real		Society	Local	Real	بيان الدعجة المرأة ليست بعيدة عن العمل السياسي في الأردن بيان الدعجة عضو في الحزب الديمقراطي الإجتماعي الأردني شباب وأحزاب الأردن	[('', 'بيان/NN'), ('', 'الدعجة/DTNN'), ('', 'المرأة/DTJJ'), ('', 'ليست/VBD'), ('', 'بعيدة/JJ'), ('', 'عن/IN'), ('', 'العمل/DTNN'), ('', 'السياسي/DTJJ'), ('', 'في/IN'), ('', 'الأردن/DTNN'), ('', 'بيان/NN'), ('', 'الدعجة/DTNN'), ('', 'عضو/NN'), ('', 'في/IN'), ('', 'الحزب/DTNN'), ('', 'الديمقراطي/DTJJ'), ('', 'الإجتماعي/DTJJ'), ('', 'الأردني/DTJJ'), ('', 'شباب/NN'), ('', 'وأحزاب/NN'), ('', 'الأردن/D…	['حزن']	بيا دعج مرء عيد عمل سياس ارد بيا دعج عضو حزب ديمقراط اجتماع اردن شباب احزاب ارد تلفز اردن		Society		Women Issues		Real
وسائل إعلام إسرائيلية اعتراضات صاروخية سجلت في سماء مدينة أسدود	Politics	Israeli-Palestinian Conflict	Real		Politics	Local	Real	وسائل إعلام إسرائيلية اعتراضات صاروخية سجلت في سماء مدينة أسدود	[('', 'وسائل/NN'), ('', 'إعلام/NN'), ('', 'إسرائيلية/JJ'), ('', 'اعتراضات/NNS'), ('', 'صاروخية/JJ'), ('', 'سجلت/VBN'), ('', 'في/IN'), ('', 'سماء/NN'), ('', 'مدينة/NN'), ('', 'أسدود/NNP')]	['حب']	سايل اعلام اسراييل اعتراض صاروخ سجل سماء مدين اسدود		Politics		Israeli-Palestinian Conflict		Real
ما يميز الحزب الديمقراطي الاجتماعي الأردني سلمان النقرش الأمين العام لـلحزب الديمقراطي الاجتماعي الأردني شباب وأحزاب الأردن	Politics	Local	Real		Politics	Local	Real	ما يميز الحزب الديمقراطي الاجتماعي الأردني سلمان النقرش الأمين العام لـلحزب الديمقراطي الاجتماعي الأردني شباب وأحزاب الأردن	[('', 'ما/WP'), ('', 'يميز/VBP'), ('', 'الحزب/DTNN'), ('', 'الديمقراطي/DTJJ'), ('', 'الاجتماعي/DTJJ'), ('', 'الأردني/DTJJ'), ('', 'سلمان/NNP'), ('', 'النقرش/DTNNP'), ('', 'الأمين/DTJJ'), ('', 'العام/DTJJ'), ('', 'لـلحزب/NNP'), ('', 'الديمقراطي/DTNNP'), ('', 'الاجتماعي/DTJJ'), ('', 'الأردني/DTJJ'), ('', 'شباب/NNP'), ('', 'وأحزاب/NNP'), ('', 'الأردن/DTNNP'), ('', 'التلفزيون/DTNN'), ('', 'الأردني/DT…	['No Emotion Detected']	يميز حزب ديمقراط اجتماع اردن سلما نقرش الام عام حزب ديمقراط اجتماع اردن شباب احزاب ارد تلفز اردن		Politics		Local		Real
ولي العهد يبحث فرص التعاون في الاستثمار مع قادة أعمال سنغافوريين التقى سمو الأمير الحسين بن عبدالله الثاني ولي العهد اليوم الجمعة في سنغافورة قادة أعمال من كبرى الشركات والمؤسسات السنغافورية وبحث سمو ولي العهد مع الحضور فرص التعاون في الاستثمار بين الأردن وسنغافورة لتحقيق التكامل والازدهار بين البلدين وأشار سموه في حديثه إلى مواطن القوة والفرص المتوفرة بالأردن الذي يتمتع برأس مال بشري وقوى عاملة …	Government	Diplomacy Relations	Real		Government	Local	Real	ولي العهد يبحث فرص التعاون في الاستثمار مع قادة أعمال سنغافوريين التقى سمو الأمير الحسين بن عبدالله الثاني ولي العهد اليوم الجمعة في سنغافورة قادة أعمال من كبرى الشركات والمؤسسات السنغافورية وبحث سمو ولي العهد مع الحضور فرص التعاون في الاستثمار بين الأردن وسنغافورة لتحقيق التكامل والازدهار بين البلدين وأشار سموه في حديثه إلى مواطن القوة والفرص المتوفرة بالأردن الذي يتمتع برأس مال بشري وقوى عاملة …	[('', 'ولي/NN'), ('', 'العهد/DTNN'), ('', 'يبحث/VBP'), ('', 'فرص/NN'), ('', 'التعاون/DTNN'), ('', 'في/IN'), ('', 'الاستثمار/DTNN'), ('', 'مع/NN'), ('', 'قادة/NN'), ('', 'أعمال/NN'), ('', 'سنغافوريين/JJ'), ('', 'التقى/VBD'), ('', 'سمو/NN'), ('', 'الأمير/DTNN'), ('', 'الحسين/DTNNP'), ('', 'بن/NNP'), ('', 'عبدالله/NNP'), ('', 'الثاني/DTNNP'), ('', 'ولي/NN'), ('', 'العهد/DTNN'), ('', 'اليوم/DTNN'), (…	['Conflicting Emotions Detected']	ول عهد يبحث فرص تعا استثمار قاد اعمال سنغافور تقى سمو امير الحس بن عبدالل ثان ول عهد يوم جمع سنغافور قاد اعمال كبرى شرك موسس سنغافور بحث سمو ول عهد حضور فرص تعا استثمار ارد سنغافور تحقيق تكامل ازدهار بلد اشار سمو حديث مواط القو فرص متوفر ارد يتمتع راس مال بشر قوى عامل متفوق مجال تكنولوج هندس اضاف موقع استراتيج مملك امكان وصول قاعد مستهلك تضم مليار شخص خلال اتفاق تجار الحر متعدد اوضح سمو ول عهد ار…		Government		Diplomacy Relations		Real
محكمة العدل الدولية اختتام جلسات الاستماع بشأن الطلب المقدم من جنوب إفريقيا في القضية ضد إسرائيل	Law	International	Real		Law	Local	Real	محكمة العدل الدولية اختتام جلسات الاستماع بشأن الطلب المقدم من جنوب إفريقيا في القضية ضد إسرائيل	[('', 'محكمة/NN'), ('', 'العدل/DTNN'), ('', 'الدولية/DTJJ'), ('', 'اختتام/NN'), ('', 'جلسات/NNS'), ('', 'الاستماع/DTNN'), ('', 'بشأن/NNP'), ('', 'الطلب/DTNN'), ('', 'المقدم/DTJJ'), ('', 'من/IN'), ('', 'جنوب/NN'), ('', 'إفريقيا/JJ'), ('', 'في/IN'), ('', 'القضية/DTNN'), ('', 'ضد/NN'), ('', 'إسرائيل/NNP')]	['No Emotion Detected']	محكم عدل دول اختتام جلس استماع بشء طلب مقدم جنوب افريق القض ضد اسراييل		Law		International		Real
شباب وأحزاب حزب الديمقراطي الإجتماعي الأردني سلمان النقرش الأمين العام لـلحزب الديمقراطي الاجتماعي الأردني شباب وأحزاب الأردن	Politics	Youth Empowerment	Real		Politics	Local	Real	شباب وأحزاب حزب الديمقراطي الإجتماعي الأردني سلمان النقرش الأمين العام لـلحزب الديمقراطي الاجتماعي الأردني شباب وأحزاب الأردن	[('', 'شباب/NN'), ('', 'وأحزاب/NN'), ('', 'حزب/NN'), ('', 'الديمقراطي/DTNNP'), ('', 'الإجتماعي/DTJJ'), ('', 'الأردني/DTJJ'), ('', 'سلمان/NNP'), ('', 'النقرش/DTNNP'), ('', 'الأمين/DTJJ'), ('', 'العام/DTJJ'), ('', 'لـلحزب/NNP'), ('', 'الديمقراطي/DTNNP'), ('', 'الاجتماعي/DTJJ'), ('', 'الأردني/DTJJ'), ('', 'شباب/NNP'), ('', 'وأحزاب/NNP'), ('', 'الأردن/DTNNP'), ('', 'التلفزيون/DTNN'), ('', 'الأردني/DT…	['No Emotion Detected']	شباب احزاب حزب ديمقراط اجتماع اردن سلما نقرش الام عام حزب ديمقراط اجتماع اردن شباب احزاب ارد تلفز اردن		Politics		Youth Empowerment		Real
استراتيجية شركة البوتاس العربية للأعوام د معن النسور الرئيس التنفيذي لشركة البوتاس العربية الأردن ستون دقيقة	Economy	Local	Real		Economy	Local	Real	استراتيجية شركة البوتاس العربية للأعوام د معن النسور الرئيس التنفيذي لشركة البوتاس العربية الأردن ستون دقيقة	[('', 'استراتيجية/NN'), ('', 'شركة/NN'), ('', 'البوتاس/DTNN'), ('', 'العربية/DTJJ'), ('', 'للأعوام/NN'), ('', 'د/NN'), ('', 'معن/NNP'), ('', 'النسور/DTNN'), ('', 'الرئيس/DTNN'), ('', 'التنفيذي/DTJJ'), ('', 'لشركة/NN'), ('', 'البوتاس/DTNN'), ('', 'العربية/DTJJ'), ('', 'الأردن/DTJJ'), ('', 'التلفزيون/DTNN'), ('', 'الأردني/DTJJ'), ('', 'ستون/CD'), ('', 'دقيقة/NN')]	['سعادة']	استراتيج شرك بوتاس عرب اعوام معن نسور رييس تنفيذ لشرك بوتاس عرب ارد تلفز اردن دقيق		Economy		Local		Real
ولي العهد يلتقي وزير الأمن القومي ووزير التعليم في سنغافورة التقى سمو الأمير الحسين بن عبدالله الثاني ولي العهد اليوم الجمعة في سنغافورة الوزير الأول والوزير المنسق للأمن القومي تيو تشي هين ووزير التعليم والوزير المسؤول عن الخدمة العامة تشان تشون سينغ وتم التأكيد خلال اللقاء على العلاقات المتينة التي تجمع البلدين وتم بحث سبل تعزيز أمنهما القومي في ظل وجود البلدين في مناطق محاطة بالاضطرابات الجيوس…	Government	Diplomacy Relations	Real		Government	Local	Real	ولي العهد يلتقي وزير الأمن القومي ووزير التعليم في سنغافورة التقى سمو الأمير الحسين بن عبدالله الثاني ولي العهد اليوم الجمعة في سنغافورة الوزير الأول والوزير المنسق للأمن القومي تيو تشي هين ووزير التعليم والوزير المسؤول عن الخدمة العامة تشان تشون سينغ وتم التأكيد خلال اللقاء على العلاقات المتينة التي تجمع البلدين وتم بحث سبل تعزيز أمنهما القومي في ظل وجود البلدين في مناطق محاطة بالاضطرابات الجيوس…	[('', 'ولي/NN'), ('', 'العهد/DTNN'), ('', 'يلتقي/VBP'), ('', 'وزير/NN'), ('', 'الأمن/DTNN'), ('', 'القومي/DTJJ'), ('', 'ووزير/NNP'), ('', 'التعليم/DTNN'), ('', 'في/IN'), ('', 'سنغافورة/NNP'), ('', 'التقى/VBD'), ('', 'سمو/NN'), ('', 'الأمير/DTNN'), ('', 'الحسين/DTNNP'), ('', 'بن/NNP'), ('', 'عبدالله/NNP'), ('', 'الثاني/DTNNP'), ('', 'ولي/NN'), ('', 'العهد/DTNN'), ('', 'اليوم/DTNN'), ('', 'الجمعة/D…	['Conflicting Emotions Detected']	ول عهد يلتق زير امن قوم وزير تعليم سنغافور تقى سمو امير الحس بن عبدالل ثان ول عهد يوم جمع سنغافور وزير اول وزير منسق امن قوم تيو تش هين وزير تعليم وزير مسوول خدم عام تشا تشو سينغ وتم تاكيد خلال لقاء علاق متين تجمع بلد وتم بحث سبل تعزيز امن قوم ظل جود بلد مناطق محاط اضطراب جيوسياس جرى تاكيد اهم توسيع شراك مجال مكافح ارهاب خلال رامج تدريب مشترك ناء قدر تنسيق مخاطر امن تواج منطق تحقيق استقرار اقليم …		Government		Diplomacy Relations		Real
ولي العهد يرعى إطلاق معرض أردني في سنغافورة يساهم في الترويج السياحي للأردن	Tourism	Local	Real		Tourism	Local	Real	ولي العهد يرعى إطلاق معرض أردني في سنغافورة يساهم في الترويج السياحي للأردن	[('', 'ولي/NN'), ('', 'العهد/DTNN'), ('', 'يرعى/VBP'), ('', 'إطلاق/NN'), ('', 'معرض/NN'), ('', 'أردني/JJ'), ('', 'في/IN'), ('', 'سنغافورة/NNP'), ('', 'يساهم/VBP'), ('', 'في/IN'), ('', 'الترويج/DTNN'), ('', 'السياحي/DTJJ'), ('', 'للأردن/NNP')]	['حزن']	ول عهد يرعى اطلاق معرض ارد سنغافور يسا ترويج سياح ارد		Tourism		Local		Real
كلمة سمو الأمير الحسين بن عبدالله الثاني ولي العهد خلال مأدبة غداء رسمية أقامها رئيس الوزراء السنغافوري تكريما لسموه والوفد المرافق	Government	Royal	Real		Government	Local	Real	كلمة سمو الأمير الحسين بن عبدالله الثاني ولي العهد خلال مأدبة غداء رسمية أقامها رئيس الوزراء السنغافوري تكريما لسموه والوفد المرافق	[('', 'كلمة/NN'), ('', 'سمو/NN'), ('', 'الأمير/DTNN'), ('', 'الحسين/DTNNP'), ('', 'بن/NNP'), ('', 'عبدالله/NNP'), ('', 'الثاني/DTNNP'), ('', 'ولي/NN'), ('', 'العهد/DTNN'), ('', 'خلال/NN'), ('', 'مأدبة/NN'), ('', 'غداء/NN'), ('', 'رسمية/JJ'), ('', 'أقامها/NN'), ('', 'رئيس/NN'), ('', 'الوزراء/DTNN'), ('', 'السنغافوري/DTJJ'), ('', 'تكريما/NN'), ('', 'لسموه/NN'), ('', 'والوفد/NN'), ('', 'المرافق/DTNN…	['Conflicting Emotions Detected']	كلم سمو امير الحس بن عبدالل ثان ول عهد خلال مادب غداء رسم اقام رييس وزراء سنغافور تكريم لسم وفد مرافق		Government		Royal		Real
ستون دقيقة دور شركة البوتاس في دعم الاقتصاد الوطني الأردن ستون دقيقة	Economy	Financial Policies	Real		Economy	Local	Real	ستون دقيقة دور شركة البوتاس في دعم الاقتصاد الوطني الأردن ستون دقيقة	[('', 'ستون/CD'), ('', 'دقيقة/NN'), ('', 'دور/NN'), ('', 'شركة/NN'), ('', 'البوتاس/DTNN'), ('', 'في/IN'), ('', 'دعم/NN'), ('', 'الاقتصاد/DTNN'), ('', 'الوطني/DTJJ'), ('', 'الأردن/DTJJ'), ('', 'التلفزيون/DTNN'), ('', 'الأردني/DTJJ'), ('', 'ستون/CD'), ('', 'دقيقة/NN')]	['اشمئزاز']	دقيق دور شرك بوتاس دعم اقتصاد وطن ارد تلفز اردن دقيق		Economy		Financial Policies		Real
المغطس وجهة الحج للكنائس المسيحية في كانون الثاني	Religion	Christian	Real		Religion	Local	Real	المغطس وجهة الحج للكنائس المسيحية في كانون الثاني	[('', 'المغطس/DTNN'), ('', 'وجهة/NN'), ('', 'الحج/DTNN'), ('', 'للكنائس/NN'), ('', 'المسيحية/DTNN'), ('', 'في/IN'), ('', 'كانون/NNP'), ('الثاني/ADJ', 'NUM')]	['حزن']	مغطس وجه الحج كنايس مسيح ثان		Religion		Christian		Real
ولي العهد يرعى إطلاق معرض أردني في سنغافورة يساهم في الترويج السياحي للأردن رعى سمو الأمير الحسين بن عبدالله الثاني ولي العهد اليوم الجمعة بالعاصمة السنغافورية وبحضور سمو الأميرة رجوة الحسين إطلاق المعرض الأردني بمنطقة حدائق الخليج جاردنز باي ذا بي وجال سموهما في مرافق المعرض الذي يساهم في الترويج السياحي للأردن وتعزيز وتوسيع التبادل السياحي بين البلدين قبل أن يشارك سموه في زراعة أول شجرة زيتون أ…	Tourism	Promotion	Real		Tourism	Local	Real	ولي العهد يرعى إطلاق معرض أردني في سنغافورة يساهم في الترويج السياحي للأردن رعى سمو الأمير الحسين بن عبدالله الثاني ولي العهد اليوم الجمعة بالعاصمة السنغافورية وبحضور سمو الأميرة رجوة الحسين إطلاق المعرض الأردني بمنطقة حدائق الخليج جاردنز باي ذا بي وجال سموهما في مرافق المعرض الذي يساهم في الترويج السياحي للأردن وتعزيز وتوسيع التبادل السياحي بين البلدين قبل أن يشارك سموه في زراعة أول شجرة زيتون أ…	[('', 'ولي/NN'), ('', 'العهد/DTNN'), ('', 'يرعى/VBP'), ('', 'إطلاق/NN'), ('', 'معرض/NN'), ('', 'أردني/JJ'), ('', 'في/IN'), ('', 'سنغافورة/NNP'), ('', 'يساهم/VBP'), ('', 'في/IN'), ('', 'الترويج/DTNN'), ('', 'السياحي/DTJJ'), ('', 'للأردن/NNP'), ('', 'رعى/VBD'), ('', 'سمو/NN'), ('', 'الأمير/DTNN'), ('', 'الحسين/DTNNP'), ('', 'بن/NNP'), ('', 'عبدالله/NNP'), ('', 'الثاني/DTNNP'), ('', 'ولي/NN'), ('', …	['Conflicting Emotions Detected']	ول عهد يرعى اطلاق معرض ارد سنغافور يسا ترويج سياح ارد رعى سمو امير الحس بن عبدالل ثان ول عهد يوم جمع عاصم سنغافور حضور سمو امير رجو الحس اطلاق معرض اردن منطق حدايق خليج جاردنز با جال سمو مرافق معرض يسا ترويج سياح ارد تعزيز توسيع تبادل سياح بلد يشار سمو زراع شجر زيتو اردن حدايق خليج يوفر معرض فرص زاير حدايق خليج اطلاع مجسم مواقع اثر اردن مشاهد معرض صور مواقع اثر واستعراض قطع سيفساء كنيس قديس اسطفا…		Tourism		Promotion		Real
الكنائس الكاثوليكية في المملكة تحيي حجها السنوي الرابع والعشرين إلى موقع المعموديّة المغطس	Religion	Christian	Real		Religion	Local	Real	الكنائس الكاثوليكية في المملكة تحيي حجها السنوي الرابع والعشرين إلى موقع المعموديّة المغطس	[('', 'الكنائس/DTNN'), ('', 'الكاثوليكية/DTJJ'), ('', 'في/IN'), ('', 'المملكة/DTNN'), ('', 'تحيي/VBP'), ('', 'حجها/NN'), ('', 'السنوي/DTJJ'), ('الرابع/ADJ', 'NUM'), ('', 'والعشرين/NNP'), ('', 'إلى/VBD'), ('', 'موقع/NN'), ('', 'المعمودية/DTNN'), ('', 'المغطس/DTJJ')]	['Conflicting Emotions Detected']	كنايس كاثوليك مملك تح حجه سنو رابع عشر موقع معمود مغطس		Religion		Christian		Real
ولي العهد يزور كلية لي كوان يو للسياسة العامة في جامعة سنغافورة الوطنية	Government	Official Visit	Real		Government	Local	Real	ولي العهد يزور كلية لي كوان يو للسياسة العامة في جامعة سنغافورة الوطنية	[('', 'ولي/NN'), ('', 'العهد/DTNN'), ('', 'يزور/VBP'), ('', 'كلية/NN'), ('', 'لي/NNP'), ('', 'كوان/NNP'), ('', 'يو/NNP'), ('', 'للسياسة/NNP'), ('', 'العامة/DTJJ'), ('', 'في/IN'), ('', 'جامعة/NN'), ('', 'سنغافورة/NNP'), ('', 'الوطنية/DTJJ')]	['حزن']	ول عهد يزور كل كوا يو سياس عام جامع سنغافور وطن		Government		Official Visit		Real
ولي العهد يلتقي رئيس الوزراء السنغافوري	Government	Diplomacy Relations	Real		Government	Local	Real	ولي العهد يلتقي رئيس الوزراء السنغافوري	[('', 'ولي/NN'), ('', 'العهد/DTNN'), ('', 'يلتقي/VBP'), ('', 'رئيس/NN'), ('', 'الوزراء/DTNN'), ('', 'السنغافوري/DTJJ')]	['No Emotion Detected']	ول عهد يلتق رييس وزراء سنغافور		Government		Diplomacy Relations		Real
الأميرة رجوة تلتقي عقيلة رئيس الوزراء السنغافوري التقت سمو الأميرة رجوة الحسين اليوم الجمعة عقيلة رئيس الوزراء السنغافوري السيدة هو تشينغ ضمن الزيارة الرسمية التي يقوم بها سمو الأمير الحسين بن عبدالله الثاني ولي العهد إلى جمهورية سنغافورة	Government	Diplomacy Relations	Real		Government	Local	Real	الأميرة رجوة تلتقي عقيلة رئيس الوزراء السنغافوري التقت سمو الأميرة رجوة الحسين اليوم الجمعة عقيلة رئيس الوزراء السنغافوري السيدة هو تشينغ ضمن الزيارة الرسمية التي يقوم بها سمو الأمير الحسين بن عبدالله الثاني ولي العهد إلى جمهورية سنغافورة	[('', 'الأميرة/DTNN'), ('', 'رجوة/NN'), ('', 'تلتقي/VBP'), ('', 'عقيلة/NN'), ('', 'رئيس/NN'), ('', 'الوزراء/DTNN'), ('', 'السنغافوري/DTJJ'), ('', 'التقت/VBD'), ('', 'سمو/NN'), ('', 'الأميرة/DTNN'), ('', 'رجوة/NN'), ('', 'الحسين/DTNNP'), ('', 'اليوم/DTNN'), ('', 'الجمعة/DTNN'), ('', 'عقيلة/NN'), ('', 'رئيس/NN'), ('', 'الوزراء/DTNN'), ('', 'السنغافوري/DTJJ'), ('', 'السيدة/DTNN'), ('', 'هو/PRP'), ('…	['حزن']	امير رجو تلتق عقيل رييس وزراء سنغافور الت سمو امير رجو الحس يوم جمع عقيل رييس وزراء سنغافور سيد تشينغ ضمن زيار رسم يقوم سمو امير الحس بن عبدالل ثان ول عهد جمهور سنغافور		Government		Diplomacy Relations		Real
سمو ولي العهد يلتقي الرئيس السنغافوري ويؤكد حرص الأردن على تعزيز الشراكة مع سنغافورة الأردن	Government	Diplomacy Relations	Real		Government	Local	Real	سمو ولي العهد يلتقي الرئيس السنغافوري ويؤكد حرص الأردن على تعزيز الشراكة مع سنغافورة الأردن	[('', 'سمو/NN'), ('', 'ولي/NN'), ('', 'العهد/DTNN'), ('', 'يلتقي/VBP'), ('', 'الرئيس/DTNN'), ('', 'السنغافوري/DTNNP'), ('', 'ويؤكد/NNP'), ('', 'حرص/VBD'), ('', 'الأردن/DTNN'), ('', 'على/IN'), ('', 'تعزيز/NN'), ('', 'الشراكة/DTNN'), ('', 'مع/NN'), ('', 'سنغافورة/NNP'), ('', 'الأردن/DTNNP'), ('', 'التلفزيون/DTNN'), ('', 'الأردني/DTJJ')]	['حزن']	سمو ول عهد يلتق رييس سنغافور يوكد حرص ارد تعزيز شراك سنغافور ارد تلفز اردن		Government		Diplomacy Relations		Real
سمو الأمير الحسين بن عبدالله الثاني ولي العهد يحضر مأدبة غداء رسمية أقامها رئيس الوزراء السنغافوري لي هسين لونغ تكريما لسموه والوفد المرافق الأردن سنغافورة	Government	Diplomacy Relations	Real		Government	Local	Real	سمو الأمير الحسين بن عبدالله الثاني ولي العهد يحضر مأدبة غداء رسمية أقامها رئيس الوزراء السنغافوري لي هسين لونغ تكريما لسموه والوفد المرافق الأردن سنغافورة	[('', 'سمو/NN'), ('', 'الأمير/DTNN'), ('', 'الحسين/DTNNP'), ('', 'بن/NNP'), ('', 'عبدالله/NNP'), ('', 'الثاني/DTNNP'), ('', 'ولي/NN'), ('', 'العهد/DTNN'), ('', 'يحضر/VBP'), ('', 'مأدبة/NN'), ('', 'غداء/NN'), ('', 'رسمية/JJ'), ('', 'أقامها/NN'), ('', 'رئيس/NN'), ('', 'الوزراء/DTNN'), ('', 'السنغافوري/DTJJ'), ('', 'لي/NNP'), ('', 'هسين/NNP'), ('', 'لونغ/NNP'), ('', 'تكريما/NN'), ('', 'لسموه/NN'), (…	['Conflicting Emotions Detected']	سمو امير الحس بن عبدالل ثان ول عهد يحضر مادب غداء رسم اقام رييس وزراء سنغافور هس لونغ تكريم لسم وفد مرافق ارد سنغافور		Government		Diplomacy Relations		Real
سمو الأمير الحسين بن عبدالله الثاني ولي العهد ورئيس الوزراء السنغافوري لي هسين لونغ يشهدان تبادل اتفاقيات تعاون بين البلدين مثمنا سموه تعاون المؤسسات السنغافورية مع الأردن في التبادل المعرفي بمجالات الإصلاح الإداري والتعليم والتدريب المهني والتقني سنغافورة	Government	Diplomacy Relations	Real		Government	Local	Real	سمو الأمير الحسين بن عبدالله الثاني ولي العهد ورئيس الوزراء السنغافوري لي هسين لونغ يشهدان تبادل اتفاقيات تعاون بين البلدين مثمنا سموه تعاون المؤسسات السنغافورية مع الأردن في التبادل المعرفي بمجالات الإصلاح الإداري والتعليم والتدريب المهني والتقني سنغافورة	[('', 'سمو/NN'), ('', 'الأمير/DTNN'), ('', 'الحسين/DTNNP'), ('', 'بن/NNP'), ('', 'عبدالله/NNP'), ('', 'الثاني/DTNNP'), ('', 'ولي/NN'), ('', 'العهد/DTNN'), ('', 'ورئيس/NNP'), ('', 'الوزراء/DTNN'), ('', 'السنغافوري/DTJJ'), ('', 'لي/NNP'), ('', 'هسين/NNP'), ('', 'لونغ/NNP'), ('', 'يشهدان/VBP'), ('', 'تبادل/NN'), ('', 'اتفاقيات/NNS'), ('', 'تعاون/NN'), ('', 'بين/NN'), ('', 'البلدين/DTNNS'), ('', 'مثم…	['حزن']	سمو امير الحس بن عبدالل ثان ول عهد رييس وزراء سنغافور هس لونغ يشهد تبادل اتفاق تعاو بلد مثم سمو تعاو موسس سنغافور ارد تبادل معرف مجال اصلاح ادار تعليم تدريب مهن والتق سنغافور		Government		Diplomacy Relations		Real
سمو الأمير الحسين بن عبدالله الثاني ولي العهد يؤكد خلال لقائه برئيس الوزراء السنغافوري لي هسين لونغ على عمق العلاقات الاستراتيجية بين البلدين مشيرا إلى ضرورة تعزيز التعاون في مختلف المجالات بخاصة الاقتصادية سمو ولي العهد يشدد خلال اللقاء على ضرورة وقف إراقة الدماء في غزة وضمان عودة الغزيين إلى منازلهم آمنين وإعادة الحقوق المسلوبة لأصحابها	Government	Diplomacy Relations	Real		Government	Local	Real	سمو الأمير الحسين بن عبدالله الثاني ولي العهد يؤكد خلال لقائه برئيس الوزراء السنغافوري لي هسين لونغ على عمق العلاقات الاستراتيجية بين البلدين مشيرا إلى ضرورة تعزيز التعاون في مختلف المجالات بخاصة الاقتصادية سمو ولي العهد يشدد خلال اللقاء على ضرورة وقف إراقة الدماء في غزة وضمان عودة الغزيين إلى منازلهم آمنين وإعادة الحقوق المسلوبة لأصحابها	[('', 'سمو/NN'), ('', 'الأمير/DTNN'), ('', 'الحسين/DTNNP'), ('', 'بن/NNP'), ('', 'عبدالله/NNP'), ('', 'الثاني/DTNNP'), ('', 'ولي/NN'), ('', 'العهد/DTNN'), ('', 'يؤكد/VBP'), ('', 'خلال/NN'), ('', 'لقائه/NN'), ('', 'برئيس/NNP'), ('', 'الوزراء/DTNN'), ('', 'السنغافوري/DTJJ'), ('', 'لي/NNP'), ('', 'هسين/NNP'), ('', 'لونغ/NNP'), ('', 'على/IN'), ('', 'عمق/NN'), ('', 'العلاقات/DTNNS'), ('', 'الاستراتيجي…	['حزن']	سمو امير الحس بن عبدالل ثان ول عهد يوكد خلال لقاء رييس وزراء سنغافور هس لونغ عمق علاق استراتيج بلد مشير ضرور تعزيز تعا مختلف مجال خاص اقتصاد سمو ول عهد يشدد خلال لقاء ضرور وقف اراق دماء غز ضما عود الغز منازل امن اعاد حقوق مسلوب اصحاب		Government		Diplomacy Relations		Real
سمو الأمير الحسين بن عبدالله الثاني ولي العهد يلتقي الرئيس السنغافوري ثارمان شانموجاراتنام بقصر أستانا الرئاسي ويؤكد تطلع الأردن للعمل مع سنغافورة بشكل أوثق وتعزيز العلاقات الاستراتيجية والمتينة بين البلدين المبنية على القيم المشتركة سمو ولي العهد يشيد بمساهمات سنغافورة في الاستجابة الإنسانية في غزة وتبرعاتها لوكالة الأمم المتحدة لإغاثة وتشغيل اللاجئين الفلسطينيين الأونروا في ظل الأزمة الإنسانية …	Government	Diplomacy Relations	Real		Government	Local	Real	سمو الأمير الحسين بن عبدالله الثاني ولي العهد يلتقي الرئيس السنغافوري ثارمان شانموجاراتنام بقصر أستانا الرئاسي ويؤكد تطلع الأردن للعمل مع سنغافورة بشكل أوثق وتعزيز العلاقات الاستراتيجية والمتينة بين البلدين المبنية على القيم المشتركة سمو ولي العهد يشيد بمساهمات سنغافورة في الاستجابة الإنسانية في غزة وتبرعاتها لوكالة الأمم المتحدة لإغاثة وتشغيل اللاجئين الفلسطينيين الأونروا في ظل الأزمة الإنسانية …	[('', 'سمو/NN'), ('', 'الأمير/DTNN'), ('', 'الحسين/DTNNP'), ('', 'بن/NNP'), ('', 'عبدالله/NNP'), ('', 'الثاني/DTNNP'), ('', 'ولي/NN'), ('', 'العهد/DTNN'), ('', 'يلتقي/VBP'), ('', 'الرئيس/DTNN'), ('', 'السنغافوري/DTNNP'), ('', 'ثارمان/NNP'), ('', 'شانموجاراتنام/NNP'), ('', 'بقصر/NNP'), ('', 'أستانا/NNP'), ('', 'الرئاسي/DTJJ'), ('', 'ويؤكد/NNP'), ('', 'تطلع/VBP'), ('', 'الأردن/DTNN'), ('', 'للعمل/N…	['Conflicting Emotions Detected']	سمو امير الحس بن عبدالل ثان ول عهد يلتق رييس سنغافور ثارم شانموجاراتنام قصر است رياس يوكد تطلع ارد عمل سنغافور شكل اوثق تعزيز علاق استراتيج متين بلد مبن قيم مشترك سمو ول عهد يشيد مساهم سنغافور استجاب انسان غز تبرع وكال امم متحد اغاث تشغيل لاجء فلسطين اونر ظل ازم انسان مسبوق يعا سكا قطاع جراء حرب مستعر سمو امير الحس بن عبدالل ثان ول عهد منطق تنعم سلام استقرار غياب حل صراع فلسطين اسراييل		Government		Diplomacy Relations		Real
ولي العهد يلتقي رئيس الوزراء السنغافوري أكد سمو الأمير الحسين بن عبدالله الثاني ولي العهد خلال لقائه اليوم الجمعة برئيس الوزراء السنغافوري لي هسين لونغ عمق العلاقات الاستراتيجية بين البلدين مشيرا إلى ضرورة تعزيز التعاون في مختلف المجالات بخاصة الاقتصادية ولفت سمو ولي العهد خلال اللقاء الذي عقد في قصر أستانا الرئاسي إلى أهمية اتفاقيات التعاون بين البلدين والتي شهد سموه تبادل بعضها خلال الزيارة مثم…	Economy	International	Real		Economy	Local	Real	ولي العهد يلتقي رئيس الوزراء السنغافوري أكد سمو الأمير الحسين بن عبدالله الثاني ولي العهد خلال لقائه اليوم الجمعة برئيس الوزراء السنغافوري لي هسين لونغ عمق العلاقات الاستراتيجية بين البلدين مشيرا إلى ضرورة تعزيز التعاون في مختلف المجالات بخاصة الاقتصادية ولفت سمو ولي العهد خلال اللقاء الذي عقد في قصر أستانا الرئاسي إلى أهمية اتفاقيات التعاون بين البلدين والتي شهد سموه تبادل بعضها خلال الزيارة مثم…	[('', 'ولي/NN'), ('', 'العهد/DTNN'), ('', 'يلتقي/VBP'), ('', 'رئيس/NN'), ('', 'الوزراء/DTNN'), ('', 'السنغافوري/DTJJ'), ('', 'أكد/VBD'), ('', 'سمو/NN'), ('', 'الأمير/DTNN'), ('', 'الحسين/DTNNP'), ('', 'بن/NNP'), ('', 'عبدالله/NNP'), ('', 'الثاني/DTNNP'), ('', 'ولي/NN'), ('', 'العهد/DTNN'), ('', 'خلال/NN'), ('', 'لقائه/NN'), ('', 'اليوم/DTNN'), ('', 'الجمعة/DTNN'), ('', 'برئيس/NNP'), ('', 'الوزراء…	['Conflicting Emotions Detected']	ول عهد يلتق رييس وزراء سنغافور اكد سمو امير الحس بن عبدالل ثان ول عهد خلال لقاء يوم جمع رييس وزراء سنغافور هس لونغ عمق علاق استراتيج بلد مشير ضرور تعزيز تعا مختلف مجال خاص اقتصاد ولف سمو ول عهد خلال لقاء عقد قصر است رياس اهم اتفاق تعا بلد وال شهد سمو تبادل بعض خلال زيار مثم تعاو موسس سنغافور ارد تبادل معرف مجال اصلاح ادار تعليم تدريب مهن والتق اعرب سمو شكر تقدير حكوم سنغافور جهود اغاث انسان قطاع …		Economy		International		Real
وزير عدل جنوب إفريقيا إسرائيل أخفقت في الرد على ما تقدمنا به ومتمسكون بوقائع القانون والبراهين التي قدمناها إسرائيل تبدو غير قادرة على إدانة أفعال جنودها ولا يمكن تجاهل تصريحات مسؤوليها طبقا لمعاهدة الإبادة الجماعية لا شيء يبرر الطريقة التي تخوض بها إسرائيل الحرب غزة	Law	International	Real		Law	Local	Real	وزير عدل جنوب إفريقيا إسرائيل أخفقت في الرد على ما تقدمنا به ومتمسكون بوقائع القانون والبراهين التي قدمناها إسرائيل تبدو غير قادرة على إدانة أفعال جنودها ولا يمكن تجاهل تصريحات مسؤوليها طبقا لمعاهدة الإبادة الجماعية لا شيء يبرر الطريقة التي تخوض بها إسرائيل الحرب غزة	[('', 'وزير/NN'), ('', 'عدل/NN'), ('', 'جنوب/NN'), ('', 'إفريقيا/JJ'), ('', 'إسرائيل/NN'), ('', 'أخفقت/VBD'), ('', 'في/IN'), ('', 'الرد/DTNN'), ('', 'على/IN'), ('', 'ما/WP'), ('', 'تقدمنا/VBD'), ('', 'به/NN'), ('', 'ومتمسكون/NN'), ('', 'بوقائع/NN'), ('', 'القانون/DTNN'), ('', 'والبراهين/NNP'), ('', 'التي/WP'), ('', 'قدمناها/NN'), ('', 'إسرائيل/NN'), ('', 'تبدو/VBP'), ('', 'غير/NN'), ('', 'قادرة/J…	['غضب']	زير عدل جنوب افريق اسراييل اخفق الرد تقدم متمسك وقايع قان راه قدمن اسراييل تبد قادر ادان افعال جنود يمك تجاهل تصريح مسوول طبق معاهد اباد جماع شيء يبرر طريق تخوض اسراييل حرب غز تلفز اردن		Law		International		Real
ولي العهد يلتقي الرئيس السنغافوري ويؤكد حرص الأردن على تعزيز الشراكة مع سنغافورة التقى سمو الأمير الحسين بن عبدالله الثاني ولي العهد اليوم الجمعة الرئيس السنغافوري ثارمان شانموجاراتنام بقصر أستانا الرئاسي ونقل سموه تحيات جلالة الملك وتهانيه إلى الرئيس السنغافوري بمناسبه فوزه بالانتخابات الرئاسية نهاية العام الماضي مؤكدا تطلع الأردن للعمل مع سنغافورة بشكل أوثق وتعزيز العلاقات الاستراتيجية والمتينة…	Government	Diplomacy Relations	Real		Government	Local	Real	ولي العهد يلتقي الرئيس السنغافوري ويؤكد حرص الأردن على تعزيز الشراكة مع سنغافورة التقى سمو الأمير الحسين بن عبدالله الثاني ولي العهد اليوم الجمعة الرئيس السنغافوري ثارمان شانموجاراتنام بقصر أستانا الرئاسي ونقل سموه تحيات جلالة الملك وتهانيه إلى الرئيس السنغافوري بمناسبه فوزه بالانتخابات الرئاسية نهاية العام الماضي مؤكدا تطلع الأردن للعمل مع سنغافورة بشكل أوثق وتعزيز العلاقات الاستراتيجية والمتينة…	[('', 'ولي/NN'), ('', 'العهد/DTNN'), ('', 'يلتقي/VBP'), ('', 'الرئيس/DTNN'), ('', 'السنغافوري/DTNNP'), ('', 'ويؤكد/NNP'), ('', 'حرص/VBD'), ('', 'الأردن/DTNN'), ('', 'على/IN'), ('', 'تعزيز/NN'), ('', 'الشراكة/DTNN'), ('', 'مع/NN'), ('', 'سنغافورة/NNP'), ('', 'التقى/VBD'), ('', 'سمو/NN'), ('', 'الأمير/DTNN'), ('', 'الحسين/DTNNP'), ('', 'بن/NNP'), ('', 'عبدالله/NNP'), ('', 'الثاني/DTNNP'), ('', 'ولي…	['Conflicting Emotions Detected']	ول عهد يلتق رييس سنغافور يوكد حرص ارد تعزيز شراك سنغافور تقى سمو امير الحس بن عبدالل ثان ول عهد يوم جمع رييس سنغافور ثارم شانموجاراتنام قصر است رياس نقل سمو تح جلال ملك تهان رييس سنغافور مناسب فوز انتخاب رياس نها عام ماض موكد تطلع ارد عمل سنغافور شكل اوثق تعزيز علاق استراتيج متين بلد مبن قيم مشترك اشاد سمو ول عهد بنم علاق مطرد بلد مدى عقود ماض وال ترسخ خلال زيار متبادل معرب اعتزاز تعا بلد مختلف م…		Government		Diplomacy Relations		Real
محكمة العدل الدولية ترفع جلستها بعد الاستماع لفريق الدفاع الإسرائيلي في قضية ارتكاب إبادة جماعية	Law	International	Real		Law	Local	Real	محكمة العدل الدولية ترفع جلستها بعد الاستماع لفريق الدفاع الإسرائيلي في قضية ارتكاب إبادة جماعية	[('', 'محكمة/NN'), ('', 'العدل/DTNN'), ('', 'الدولية/DTJJ'), ('', 'ترفع/VBP'), ('', 'جلستها/NN'), ('', 'بعد/NN'), ('', 'الاستماع/DTNN'), ('', 'لفريق/NN'), ('', 'الدفاع/DTNN'), ('', 'الإسرائيلي/DTJJ'), ('', 'في/IN'), ('', 'قضية/NN'), ('', 'ارتكاب/NN'), ('', 'إبادة/NN'), ('', 'جماعية/JJ')]	['No Emotion Detected']	محكم عدل دول ترفع جلس استماع فريق دفاع اسراييل قض ارتكاب اباد جماع		Law		International		Real
ولي العهد يزور معهد التعليم التقني السنغافوري	Government	Royal	Real		Education	Local	Real	ولي العهد يزور معهد التعليم التقني السنغافوري	[('', 'ولي/NN'), ('', 'العهد/DTNN'), ('', 'يزور/VBP'), ('', 'معهد/NN'), ('', 'التعليم/DTNN'), ('', 'التقني/DTJJ'), ('', 'السنغافوري/DTJJ')]	['No Emotion Detected']	ول عهد يزور معهد تعليم تقن سنغافور		Government		Royal		Real
عاجل وزارة الصحة في غزة استشهاد	Health	Israeli-Palestinian Conflict	Real		Health	Local	Real	عاجل وزارة الصحة في غزة استشهاد	[('', 'عاجل/JJ'), ('', 'وزارة/NN'), ('', 'الصحة/DTNN'), ('', 'في/IN'), ('', 'غزة/NNP'), ('', 'استشهاد/NN')]	['No Emotion Detected']	عاجل زار الصح غز استشهاد		Health		Israeli-Palestinian Conflict		Real
الفريق القانوني لإسرائيل ما عرض في جلسة أمس من صور فردية ليس دليلا على وجود نية لارتكاب إبادة جماعية الحقائق القائمة لا تستدعي تطبيق الإجراءات الاحترازية التي تطالب بها جنوب إفريقيا	Politics	Israeli-Palestinian Conflict	Fake		Politics	Local	Fake	الفريق القانوني لإسرائيل ما عرض في جلسة أمس من صور فردية ليس دليلا على وجود نية لارتكاب إبادة جماعية الحقائق القائمة لا تستدعي تطبيق الإجراءات الاحترازية التي تطالب بها جنوب إفريقيا	[('', 'الفريق/DTNN'), ('', 'القانوني/DTJJ'), ('', 'لإسرائيل/NNP'), ('', 'ما/WP'), ('', 'عرض/VBD'), ('', 'في/IN'), ('', 'جلسة/NN'), ('', 'أمس/NN'), ('', 'من/IN'), ('', 'صور/NN'), ('', 'فردية/JJ'), ('', 'ليس/VBD'), ('', 'دليلا/NN'), ('', 'على/IN'), ('', 'وجود/NN'), ('', 'نية/NN'), ('', 'لارتكاب/NN'), ('', 'إبادة/NN'), ('', 'جماعية/JJ'), ('', 'الحقائق/DTNN'), ('', 'القائمة/DTJJ'), ('', 'لا/RP'), (''…	['حزن']	فريق قانون اسراييل عرض جلس صور فرد دليل جود ني ارتكاب اباد جماع حقايق قايم تستدع تطبيق اجراء احتراز تطالب جنوب افريق		Politics		Israeli-Palestinian Conflict		Fake
مفوضية الأمم المتحدة لحقوق الإنسان وقف إطلاق النار في غزة أصبح اليوم أكثر إلحاحا من أي وقت مضى على الاحتلال الإسرائيلي اتخاذ تدابير فورية لحماية المدنيين في غزة على الاحتلال وضع حد للاعتقال التعسفي والتعذيب والإخفاء القسري لمواطني غزة الوضع غير محتمل في جنوب غزة المكتظ بما يزيد عن مليون نازح في رفح	Humanitarian	Israeli-Palestinian Conflict	Real		Humanitarian	Local	Real	مفوضية الأمم المتحدة لحقوق الإنسان وقف إطلاق النار في غزة أصبح اليوم أكثر إلحاحا من أي وقت مضى على الاحتلال الإسرائيلي اتخاذ تدابير فورية لحماية المدنيين في غزة على الاحتلال وضع حد للاعتقال التعسفي والتعذيب والإخفاء القسري لمواطني غزة الوضع غير محتمل في جنوب غزة المكتظ بما يزيد عن مليون نازح في رفح	[('', 'مفوضية/NN'), ('', 'الأمم/DTNNP'), ('', 'المتحدة/DTJJ'), ('', 'لحقوق/NN'), ('', 'الإنسان/DTNN'), ('', 'وقف/NN'), ('', 'إطلاق/NN'), ('', 'النار/DTNN'), ('', 'في/IN'), ('', 'غزة/NNP'), ('', 'أصبح/VBP'), ('', 'اليوم/DTNN'), ('', 'أكثر/NN'), ('', 'إلحاحا/NN'), ('', 'من/IN'), ('', 'أي/NN'), ('', 'وقت/NN'), ('', 'مضى/VBD'), ('', 'على/IN'), ('', 'الاحتلال/DTNN'), ('', 'الإسرائيلي/DTJJ'), ('', 'اتخ…	['غضب']	مفوض امم متحد حقوق انس وقف اطلاق نار غز يوم الحاح وقت مضى احتلال اسراييل اتخاذ تدابير فور لحما مدن غز احتلال وضع حد اعتقال تعسف تعذيب اخفاء قسر مواط غز وضع محتمل جنوب غز مكتظ يزيد مليو نازح رفح		Humanitarian		Israeli-Palestinian Conflict		Real
ضيوف حلقة اليوم من برنامج يسعد صباحك م عبد الحكيم الهندي رئيس لجنة السياحة والآثار في مجلس الأعيان د غيث عويس مدير مديرية التوعية والإعلام الصحي في وزارة الصحة د أغادير جويحان مدير عام مؤسسة الأميرة تغريد ماهر المناجعة صانع المحتوى السياحي الأردن يسعد صباحك	Media	TV Show	Real		Media	Local	Real	ضيوف حلقة اليوم من برنامج يسعد صباحك م عبد الحكيم الهندي رئيس لجنة السياحة والآثار في مجلس الأعيان د غيث عويس مدير مديرية التوعية والإعلام الصحي في وزارة الصحة د أغادير جويحان مدير عام مؤسسة الأميرة تغريد ماهر المناجعة صانع المحتوى السياحي الأردن يسعد صباحك	[('', 'ضيوف/NN'), ('', 'حلقة/NN'), ('', 'اليوم/DTNN'), ('', 'من/IN'), ('', 'برنامج/NN'), ('', 'يسعد/VBP'), ('', 'صباحك/NNP'), ('', 'م/IN'), ('', 'عبد/NNP'), ('', 'الحكيم/DTNNP'), ('', 'الهندي/DTNNP'), ('', 'رئيس/NN'), ('', 'لجنة/NN'), ('', 'السياحة/DTNN'), ('', 'والآثار/NN'), ('', 'في/IN'), ('', 'مجلس/NN'), ('', 'الأعيان/DTNN'), ('', 'د/NN'), ('', 'غيث/NNP'), ('', 'عويس/NNP'), ('', 'مدير/NN'), ('…	['حزن']	ضيوف حلق يوم رنامج يسعد صباح عبد حكيم هند رييس لجن سياح اثار مجلس الاع غيث عويس مدير مدير توع اعلام الصح زار الصح اغادير جويح مدير عام موسس امير تغريد ماهر مناجع صانع محتوى سياح ارد تلفز اردن يسعد صباح		Media		TV Show		Real
الكرملين ندين الضربات الأمريكية والبريطانية على أهداف للحوثيين في اليمن الكرملين الضربات على اليمن غير قانونية بموجب القانون الدولي روسيا	Military	USA issues	Real		Military	Local	Real	الكرملين ندين الضربات الأمريكية والبريطانية على أهداف للحوثيين في اليمن الكرملين الضربات على اليمن غير قانونية بموجب القانون الدولي روسيا	[('', 'الكرملين/DTNNP'), ('', 'ندين/VBP'), ('', 'الضربات/DTNNS'), ('', 'الأمريكية/DTJJ'), ('', 'والبريطانية/JJ'), ('', 'على/IN'), ('', 'أهداف/NN'), ('', 'للحوثيين/JJ'), ('', 'في/IN'), ('', 'اليمن/DTNNP'), ('', 'الكرملين/DTNNP'), ('', 'الضربات/DTNNS'), ('', 'على/IN'), ('', 'اليمن/DTNNP'), ('', 'غير/NN'), ('', 'قانونية/JJ'), ('', 'بموجب/NN'), ('', 'القانون/DTNN'), ('', 'الدولي/DTJJ'), ('', 'روسيا/N…	['Conflicting Emotions Detected']	كرمل ند ضرب امريك ريطان اهداف حوث يمن كرمل ضرب يمن قانون موجب قان دول روس تلفز اردن		Military		USA issues		Real
محكمة العدل الدولية تستمع لرد إسرائيل في الدعوى التي رفعتها ضدها جنوب إفريقيا بتهمة الإبادة الجماعية وكيل إسرائيل أمام محكمة العدل الدولية دعوى جنوب إفريقيا قدمت صورة مشوهة ومغلوطة للأحداث وكيل إسرائيل أمام محكمة العدل الدولية إذا كانت هناك أعمال إبادة جماعية فقد ارتكبت ضد إسرائيل وكيل إسرائيل أمام محكمة العدل الدولية وقف العمليات العسكرية سيمنعنا من الدفاع عن أنفسنا	Politics	Israeli-Palestinian Conflict	Real		Law	Local	Fake	محكمة العدل الدولية تستمع لرد إسرائيل في الدعوى التي رفعتها ضدها جنوب إفريقيا بتهمة الإبادة الجماعية وكيل إسرائيل أمام محكمة العدل الدولية دعوى جنوب إفريقيا قدمت صورة مشوهة ومغلوطة للأحداث وكيل إسرائيل أمام محكمة العدل الدولية إذا كانت هناك أعمال إبادة جماعية فقد ارتكبت ضد إسرائيل وكيل إسرائيل أمام محكمة العدل الدولية وقف العمليات العسكرية سيمنعنا من الدفاع عن أنفسنا	[('', 'محكمة/NN'), ('', 'العدل/DTNN'), ('', 'الدولية/DTJJ'), ('', 'تستمع/VBP'), ('', 'لرد/NN'), ('', 'إسرائيل/NN'), ('', 'في/IN'), ('', 'الدعوى/DTNN'), ('', 'التي/WP'), ('', 'رفعتها/VBD'), ('', 'ضدها/NN'), ('', 'جنوب/NN'), ('', 'إفريقيا/JJ'), ('', 'بتهمة/NN'), ('', 'الإبادة/DTNN'), ('', 'الجماعية/DTJJ'), ('', 'وكيل/NN'), ('', 'إسرائيل/NN'), ('', 'أمام/NN'), ('', 'محكمة/NN'), ('', 'العدل/DTNN'), (…	['غضب']	محكم عدل دول تستمع لرد اسراييل دعوى رفع ضده جنوب افريق تهم اباد جماع كيل اسراييل محكم عدل دول دعوى جنوب افريق قدم صور مشوه مغلوط احداث كيل اسراييل محكم عدل دول كان اعمال اباد جماع فقد ارتكب ضد اسراييل كيل اسراييل محكم عدل دول وقف عمل عسكر سيمنع دفاع انفس		Politics		Israeli-Palestinian Conflict		Real
ماهر المناجعة صانع محتوى سياحي اشتهر بترويج المناطق الطبيعية والسياحية في الأردن يسعد صباحك	Tourism	Promotion	Real		Tourism	Local	Real	ماهر المناجعة صانع محتوى سياحي اشتهر بترويج المناطق الطبيعية والسياحية في الأردن يسعد صباحك	[('', 'ماهر/NNP'), ('', 'المناجعة/DTJJ'), ('', 'صانع/NN'), ('', 'محتوى/NN'), ('', 'سياحي/JJ'), ('', 'اشتهر/VBD'), ('', 'بترويج/NN'), ('', 'المناطق/DTNN'), ('', 'الطبيعية/DTJJ'), ('', 'والسياحية/JJ'), ('', 'في/IN'), ('', 'الأردن/DTNN'), ('', 'التلفزيون/DTNN'), ('', 'الأردني/DTJJ'), ('', 'يسعد/VBP'), ('', 'صباحك/NNP')]	['حزن']	ماهر مناجع صانع محتوى سياح اشتهر ترويج مناطق طبيع سياح ارد تلفز اردن يسعد صباح		Tourism		Promotion		Real
جولة في غابات عجلون وخيراتها وطبيعتها الساحرة مع حازم رحاحلة وضيفه سامر فريحات	Tourism	Promotion	Real		Tourism	Local	Real	جولة في غابات عجلون وخيراتها وطبيعتها الساحرة مع حازم رحاحلة وضيفه سامر فريحات	[('', 'جولة/NN'), ('', 'في/IN'), ('', 'غابات/NNS'), ('', 'عجلون/NNP'), ('', 'وخيراتها/NNP'), ('', 'وطبيعتها/NNP'), ('', 'الساحرة/DTJJ'), ('', 'مع/NN'), ('', 'حازم/NNP'), ('', 'رحاحلة/NNP'), ('', 'وضيفه/NNP'), ('', 'سامر/NNP'), ('', 'فريحات/NNS')]	['سعادة']	جول غاب عجلو خير طبيع ساحر حازم رحاحل ضيف سامر ريح		Tourism		Promotion		Real
مؤسسة الأميرة تغريد للتنمية والتدريب د أغادير جويحان مدير عام مؤسسة الأميرة تغريد يسعد صباحك	Society	Local	Real		Society	Local	Real	مؤسسة الأميرة تغريد للتنمية والتدريب د أغادير جويحان مدير عام مؤسسة الأميرة تغريد يسعد صباحك	[('', 'مؤسسة/NN'), ('', 'الأميرة/DTNN'), ('', 'تغريد/NN'), ('', 'للتنمية/JJ'), ('', 'والتدريب/NN'), ('', 'د/NN'), ('', 'أغادير/NNP'), ('', 'جويحان/NNP'), ('', 'مدير/NN'), ('', 'عام/NN'), ('', 'مؤسسة/NN'), ('', 'الأميرة/DTNN'), ('', 'تغريد/NN'), ('', 'التلفزيون/DTNN'), ('', 'الأردني/DTJJ'), ('', 'يسعد/VBP'), ('', 'صباحك/NNP')]	['خوف']	موسس امير تغريد تنم تدريب اغادير جويح مدير عام موسس امير تغريد تلفز اردن يسعد صباح		Society		Local		Real
دار نعمة جرش احدى مشاريع مؤسسة الأميرة تغريد لتمكين المرأة يسعد صباحك	Society	Local	Real		Society	Local	Real	دار نعمة جرش احدى مشاريع مؤسسة الأميرة تغريد لتمكين المرأة يسعد صباحك	[('', 'دار/NN'), ('', 'نعمة/NN'), ('', 'جرش/NN'), ('', 'احدى/NN'), ('', 'مشاريع/NN'), ('', 'مؤسسة/NN'), ('', 'الأميرة/DTNN'), ('', 'تغريد/NN'), ('', 'لتمكين/NNS'), ('', 'المرأة/DTNN'), ('', 'التلفزيون/DTNN'), ('', 'الأردني/DTJJ'), ('', 'يسعد/VBP'), ('', 'صباحك/NNP')]	['No Emotion Detected']	دار نعم جرش احدى مشاريع موسس امير تغريد لتمك مرء تلفز اردن يسعد صباح		Society		Local		Real
بيت صيته للعود الشرقي عامر المناصير يسعد صباحك	Society	Local	Real		Society	Local	Real	بيت صيته للعود الشرقي عامر المناصير يسعد صباحك	[('', 'بيت/NNP'), ('', 'صيته/NNP'), ('', 'للعود/NNP'), ('', 'الشرقي/DTJJ'), ('', 'عامر/NNP'), ('', 'المناصير/DTNNP'), ('', 'التلفزيون/DTNN'), ('', 'الأردني/DTJJ'), ('', 'يسعد/VBP'), ('', 'صباحك/NNP')]	['Conflicting Emotions Detected']	بيت صيت عود شرق عامر مناصير تلفز اردن يسعد صباح		Society		Local		Real
وزير الخارجية وشؤون المغتربين ايمن الصفدي في تصريحات لبترا الأردن يتابع بقلق تطورات الأوضاع في منطقة البحر الأحمر وانعكاسات ذلك على الأمن الإقليمي بشكل عام ويؤكد ترابط استقرار المنطقة وأمنها الذي يشكل العدوان الإسرائيلي الوحشي على غزة وغطرسة إسرائيل وانتهاكاتها لحقوق الفلسطينيين التهديد الأكبر له الصفدي يحذر من أن إسرائيل تدفع المنطقة برمتها نحو المزيد من الصراع والتوتر والحروب من خلال الاستمرار …	Politics	Israeli-Palestinian Conflict	Real		Politics	Local	Real	وزير الخارجية وشؤون المغتربين ايمن الصفدي في تصريحات لبترا الأردن يتابع بقلق تطورات الأوضاع في منطقة البحر الأحمر وانعكاسات ذلك على الأمن الإقليمي بشكل عام ويؤكد ترابط استقرار المنطقة وأمنها الذي يشكل العدوان الإسرائيلي الوحشي على غزة وغطرسة إسرائيل وانتهاكاتها لحقوق الفلسطينيين التهديد الأكبر له الصفدي يحذر من أن إسرائيل تدفع المنطقة برمتها نحو المزيد من الصراع والتوتر والحروب من خلال الاستمرار …	[('', 'وزير/NN'), ('', 'الخارجية/DTNN'), ('', 'وشؤون/NNP'), ('', 'المغتربين/DTNNS'), ('', 'ايمن/NNP'), ('', 'الصفدي/DTNNP'), ('', 'في/IN'), ('', 'تصريحات/NNS'), ('', 'لبترا/NN'), ('', 'الأردن/DTNN'), ('', 'يتابع/VBP'), ('', 'بقلق/NN'), ('', 'تطورات/NNS'), ('', 'الأوضاع/DTNN'), ('', 'في/IN'), ('', 'منطقة/NN'), ('', 'البحر/DTNN'), ('', 'الأحمر/DTNN'), ('', 'وانعكاسات/NNP'), ('', 'ذلك/DT'), ('', 'عل…	['Conflicting Emotions Detected']	زير خارج شوو مغترب ايم صفد تصريح لبتر ارد يتابع قلق تطور اوضاع منطق بحر احمر وانعكاس امن اقليم شكل عام يوكد ترابط استقرار منطق وام يشكل عدو اسراييل وحش غز غطرس اسراييل وانتهاك حقوق فلسطين تهديد اكبر صفد يحذر اسراييل تدفع منطق برم مزيد صراع توتر حروب خلال استمرار عدوا غاشم غز محاول فتح جبه جديد وجر غرب ال اطال عمر رييس حكوم اسراييل سياس صفد عجز مجتمع دول لجم تطرف اسراييل وقف جرايم حرب بشع ترتكب اس…		Politics		Israeli-Palestinian Conflict		Real
حملة التطوير المهني المستمر في وزارة الصحة د غيث عويس مدير مديرية التوعية والإعلام الصحي في وزارة الصحة يسعد صباحك	Health	Local	Real		Health	Local	Real	حملة التطوير المهني المستمر في وزارة الصحة د غيث عويس مدير مديرية التوعية والإعلام الصحي في وزارة الصحة يسعد صباحك	[('', 'حملة/NN'), ('', 'التطوير/DTNN'), ('', 'المهني/DTJJ'), ('', 'المستمر/DTJJ'), ('', 'في/IN'), ('', 'وزارة/NN'), ('', 'الصحة/DTNN'), ('', 'د/NN'), ('', 'غيث/NNP'), ('', 'عويس/NNP'), ('', 'مدير/NN'), ('', 'مديرية/NN'), ('', 'التوعية/DTNN'), ('', 'والإعلام/NN'), ('', 'الصحي/DTJJ'), ('', 'في/IN'), ('', 'وزارة/NN'), ('', 'الصحة/DTNN'), ('', 'التلفزيون/DTNN'), ('', 'الأردني/DTJJ'), ('', 'يسعد/VBP')…	['No Emotion Detected']	حمل تطوير مهن مستمر زار الصح غيث عويس مدير مدير توع اعلام الصح زار الصح تلفز اردن يسعد صباح		Health		Local		Real
صباح الوطن الجميل من الشيخ حسين الأغوار الشمالية يسعد صباحك	Media	Entertainment	Real		Media	Local	Real	صباح الوطن الجميل من الشيخ حسين الأغوار الشمالية يسعد صباحك	[('', 'صباح/NN'), ('', 'الوطن/DTNN'), ('', 'الجميل/DTJJ'), ('', 'من/IN'), ('', 'الشيخ/DTNN'), ('', 'حسين/NNP'), ('', 'الأغوار/DTNNP'), ('', 'الشمالية/DTJJ'), ('', 'التلفزيون/DTNN'), ('', 'الأردني/DTJJ'), ('', 'يسعد/VBP'), ('', 'صباحك/NNP')]	['حزن']	وطن جميل شيخ حس اغوار شمال تلفز اردن يسعد صباح		Media		Entertainment		Real
تأثر السياحة في الأردن بعد العدوان على غزة م عبدالحكيم الهندي رئيس لجنة السياحة والآثار في مجلس الأعيان يسعد صباحك	Tourism	Local	Real		Tourism	Local	Real	تأثر السياحة في الأردن بعد العدوان على غزة م عبدالحكيم الهندي رئيس لجنة السياحة والآثار في مجلس الأعيان يسعد صباحك	[('', 'تأثر/VBP'), ('', 'السياحة/DTNN'), ('', 'في/IN'), ('', 'الأردن/DTNN'), ('', 'بعد/NN'), ('', 'العدوان/DTNN'), ('', 'على/IN'), ('', 'غزة/NNP'), ('', 'م/IN'), ('', 'عبدالحكيم/NNP'), ('', 'الهندي/DTNNP'), ('', 'رئيس/NN'), ('', 'لجنة/NN'), ('', 'السياحة/DTNN'), ('', 'والآثار/NN'), ('', 'في/IN'), ('', 'مجلس/NN'), ('', 'الأعيان/DTNN'), ('', 'التلفزيون/DTNN'), ('', 'الأردني/DTJJ'), ('', 'يسعد/VBP')…	['Conflicting Emotions Detected']	تاثر سياح ارد عدو غز عبدالحكيم هند رييس لجن سياح اثار مجلس الاع تلفز اردن يسعد صباح		Tourism		Local		Real
سمو ولي العهد يزور كلية لي كوان يو للسياسة العامة في جامعة سنغافورة الوطنية ويؤكد أهمية الشراكة بين الكلية والمؤسسات المعنية بالأردن في تمكين الموظفين في المراكز القيادية وتزويدهم بالمعرفة والخبرة ذات المستوى العالمي لقيادة وتنفيذ الإصلاحات الوطنية في الأردن بشكل فاعل	Education	International	Real		Education	Local	Real	سمو ولي العهد يزور كلية لي كوان يو للسياسة العامة في جامعة سنغافورة الوطنية ويؤكد أهمية الشراكة بين الكلية والمؤسسات المعنية بالأردن في تمكين الموظفين في المراكز القيادية وتزويدهم بالمعرفة والخبرة ذات المستوى العالمي لقيادة وتنفيذ الإصلاحات الوطنية في الأردن بشكل فاعل	[('', 'سمو/NN'), ('', 'ولي/NN'), ('', 'العهد/DTNN'), ('', 'يزور/VBP'), ('', 'كلية/NN'), ('', 'لي/NNP'), ('', 'كوان/NNP'), ('', 'يو/NNP'), ('', 'للسياسة/NNP'), ('', 'العامة/DTJJ'), ('', 'في/IN'), ('', 'جامعة/NN'), ('', 'سنغافورة/NNP'), ('', 'الوطنية/DTJJ'), ('', 'ويؤكد/NNP'), ('', 'أهمية/NN'), ('', 'الشراكة/DTNN'), ('', 'بين/NN'), ('', 'الكلية/DTNN'), ('', 'والمؤسسات/NNP'), ('', 'المعنية/DTJJ'), (…	['Conflicting Emotions Detected']	سمو ول عهد يزور كل كوا يو سياس عام جامع سنغافور وطن يوكد اهم شراك الكل موسس معن ارد تمك موظف مراكز قياد تزويد معرف خبر مستوى عالم قياد تنفيذ اصلاح وطن ارد شكل فاعل		Education		International		Real
حماس ندين هجوم أمريكا وبريطانيا على اليمن ونحملهما مسؤولية تداعياته على أمن المنطقة	Military	USA issues	Real		Military	Local	Real	حماس ندين هجوم أمريكا وبريطانيا على اليمن ونحملهما مسؤولية تداعياته على أمن المنطقة	[('', 'حماس/NNP'), ('', 'ندين/VBP'), ('', 'هجوم/NN'), ('', 'أمريكا/NN'), ('', 'وبريطانيا/JJ'), ('', 'على/IN'), ('', 'اليمن/DTNNP'), ('', 'ونحملهما/NN'), ('', 'مسؤولية/NN'), ('', 'تداعياته/NN'), ('', 'على/IN'), ('', 'أمن/NN'), ('', 'المنطقة/DTNN')]	['حزن']	حماس ند هجوم امر ريطان يمن نحمل مسوول تداع امن منطق		Military		USA issues		Real
وزير الدولة البريطاني للقوات المسلحة تحركنا وتحرك الأمريكيين الليلة الماضية كان دفاعا عن النفس سنرى ما إذا كانت هجمات الحوثيين ستتوقف وندرس اتخاذ مزيد من الإجراءات ردنا كان محدودا وضروريا ومتناسبا ولا نريد رؤية تصعيد في الشرق الأوسط	Military	USA issues	Real		Military	Local	Fake	وزير الدولة البريطاني للقوات المسلحة تحركنا وتحرك الأمريكيين الليلة الماضية كان دفاعا عن النفس سنرى ما إذا كانت هجمات الحوثيين ستتوقف وندرس اتخاذ مزيد من الإجراءات ردنا كان محدودا وضروريا ومتناسبا ولا نريد رؤية تصعيد في الشرق الأوسط	[('', 'وزير/NN'), ('', 'الدولة/DTNN'), ('', 'البريطاني/DTJJ'), ('', 'للقوات/NNS'), ('', 'المسلحة/DTJJ'), ('', 'تحركنا/VBD'), ('', 'وتحرك/NN'), ('', 'الأمريكيين/DTNNS'), ('', 'الليلة/DTNN'), ('', 'الماضية/DTJJ'), ('', 'كان/VBD'), ('', 'دفاعا/NN'), ('', 'عن/IN'), ('', 'النفس/DTNN'), ('', 'سنرى/JJR'), ('', 'ما/WP'), ('', 'إذا/VBD'), ('', 'كانت/VBD'), ('', 'هجمات/NNS'), ('', 'الحوثيين/DTNNS'), ('', '…	['Conflicting Emotions Detected']	زير دول بريطان للقو مسلح تحر تحر امريك ليل ماض دفاع نفس سنرى كان هجم حوث ستتوقف ندرس اتخاذ مزيد اجراء ردن محدود ضرور متناسب نريد رء تصعيد شرق اوسط		Military		USA issues		Real
يسعد صباحك الجمعة	Media	TV Show	Real		Media	Local	Real	يسعد صباحك الجمعة	[('', 'يسعد/VBP'), ('', 'صباحك/NN'), ('', 'الجمعة/DTNN'), ('', 'الأردن/DTJJ'), ('', 'التلفزيون/DTNN'), ('', 'الأردني/DTJJ')]	['No Emotion Detected']	يسعد صباح جمع ارد تلفز اردن		Media		TV Show		Real
سمو الأمير الحسين بن عبدالله الثاني ولي العهد يزور معهد التعليم التقني في العاصمة السنغافورية ويجول في مرافقه التي تضم حاضنات ابتكار ومختبرات علمية لتدريب الطلبة وتوفير التطبيقات العملية التي تؤهلهم لتلبية متطلبات سوق العمل سمو ولي العهد يؤكد أهمية بناء شراكات مستدامة بين المعهد ومؤسسات التعليم والتدريب المهني والتقني في الأردن معربا خلال لقائه بالقائمين على المعهد عن إعجابه بالتجربة السنغافورية …	Government	Technology	Real		Government	Local	Real	سمو الأمير الحسين بن عبدالله الثاني ولي العهد يزور معهد التعليم التقني في العاصمة السنغافورية ويجول في مرافقه التي تضم حاضنات ابتكار ومختبرات علمية لتدريب الطلبة وتوفير التطبيقات العملية التي تؤهلهم لتلبية متطلبات سوق العمل سمو ولي العهد يؤكد أهمية بناء شراكات مستدامة بين المعهد ومؤسسات التعليم والتدريب المهني والتقني في الأردن معربا خلال لقائه بالقائمين على المعهد عن إعجابه بالتجربة السنغافورية …	[('', 'سمو/NN'), ('', 'الأمير/DTNN'), ('', 'الحسين/DTNNP'), ('', 'بن/NNP'), ('', 'عبدالله/NNP'), ('', 'الثاني/DTNNP'), ('', 'ولي/NN'), ('', 'العهد/DTNN'), ('', 'يزور/VBP'), ('', 'معهد/NN'), ('', 'التعليم/DTNN'), ('', 'التقني/DTJJ'), ('', 'في/IN'), ('', 'العاصمة/DTNN'), ('', 'السنغافورية/DTJJ'), ('', 'ويجول/NNP'), ('', 'في/IN'), ('', 'مرافقه/NN'), ('', 'التي/WP'), ('', 'تضم/VBP'), ('', 'حاضنات/NNS…	['Conflicting Emotions Detected']	سمو امير الحس بن عبدالل ثان ول عهد يزور معهد تعليم تقن عاصم سنغافور يجول مرافق تضم حاضن ابتكار مختبر علم تدريب طلب توفير تطبيق عمل توهل لتلب متطلب سوق عمل سمو ول عهد يوكد اهم ناء شراك مستدام معهد موسس تعليم تدريب مهن والتق ارد معرب خلال لقاء قايم معهد اعجاب تجرب سنغافور مجال		Government		Technology		Real
بايدن قوات أميركية وبريطانية وبدعم من أستراليا و كندا و هولندا و البحرين نفذت ضربات على أهداف للحوثيين	Military	USA issues	Real		Military	Local	Real	بايدن قوات أميركية وبريطانية وبدعم من أستراليا و كندا و هولندا و البحرين نفذت ضربات على أهداف للحوثيين	[('', 'بايدن/VBD'), ('', 'قوات/NNS'), ('', 'أميركية/JJ'), ('', 'وبريطانية/JJ'), ('', 'وبدعم/JJ'), ('', 'من/IN'), ('', 'أستراليا/NN'), ('', 'و/CC'), ('', 'كندا/NNP'), ('', 'و/CC'), ('', 'هولندا/NNP'), ('', 'و/CC'), ('', 'البحرين/DTNNP'), ('', 'نفذت/VBD'), ('', 'ضربات/NNS'), ('', 'على/IN'), ('', 'أهداف/NN'), ('', 'للحوثيين/NNS'), ('', 'التلفزيون/DTNN'), ('', 'الأردني/DTJJ')]	['خوف']	ايد قوا اميرك ريطان دعم استرال كند هولند بحر نفذ ضرب اهداف حوث تلفز اردن		Military		USA issues		Real
هتافات لليمن وفلسطين خلال مظاهرة أمام البيت الأبيض في واشنطن	Society	International	Real		Society	Local	Real	هتافات لليمن وفلسطين خلال مظاهرة أمام البيت الأبيض في واشنطن	[('', 'هتافات/NNS'), ('', 'لليمن/VBD'), ('', 'وفلسطين/NNS'), ('', 'خلال/NN'), ('', 'مظاهرة/NN'), ('', 'أمام/NN'), ('', 'البيت/DTNN'), ('', 'الأبيض/DTJJ'), ('', 'في/IN'), ('', 'واشنطن/NNP')]	['No Emotion Detected']	هتاف يمن فلسط خلال مظاهر الب ابيض واشنط		Society		International		Real
الخارجية الإيرانية ندين بشدة الضربات العسكرية الأمريكية والبريطانية لليمن باعتبارها مخالفة للقانون الدولي نتيجة الضربات الأمريكية البريطانية لليمن ستكون المزيد من عدم الأمن وعدم الاستقرار بالمنطقة الضربات العسكرية الأمريكية البريطانية تأتي في سياق دعم حرب الكيان الصهيوني على غزة واشنطن تتحمل مسؤولية تداعيات استهداف اليمن عسكريا وما يترتب على ذلك من نتائج على المجتمع الدولي التحرك بمسؤولية لمنع تو…	Military	USA issues	Real		Military	Local	Real	الخارجية الإيرانية ندين بشدة الضربات العسكرية الأمريكية والبريطانية لليمن باعتبارها مخالفة للقانون الدولي نتيجة الضربات الأمريكية البريطانية لليمن ستكون المزيد من عدم الأمن وعدم الاستقرار بالمنطقة الضربات العسكرية الأمريكية البريطانية تأتي في سياق دعم حرب الكيان الصهيوني على غزة واشنطن تتحمل مسؤولية تداعيات استهداف اليمن عسكريا وما يترتب على ذلك من نتائج على المجتمع الدولي التحرك بمسؤولية لمنع تو…	[('', 'الخارجية/DTNN'), ('', 'الإيرانية/DTJJ'), ('', 'ندين/VBP'), ('', 'بشدة/NN'), ('', 'الضربات/DTNNS'), ('', 'العسكرية/DTJJ'), ('', 'الأمريكية/DTJJ'), ('', 'والبريطانية/NN'), ('', 'لليمن/NN'), ('', 'باعتبارها/NN'), ('', 'مخالفة/NN'), ('', 'للقانون/NNS'), ('', 'الدولي/DTJJ'), ('', 'نتيجة/NN'), ('', 'الضربات/DTNNS'), ('', 'الأمريكية/DTJJ'), ('', 'البريطانية/DTJJ'), ('', 'لليمن/NNP'), ('', 'ستكون/…	['Conflicting Emotions Detected']	خارج ايران ند بشد ضرب عسكر امريك ريطان يمن اعتبار مخالف قان دول نتيج ضرب امريك بريطان يمن ستكو مزيد عدم امن عدم استقرار منطق ضرب عسكر امريك بريطان تات سياق دعم حرب الك صهيون غز واشنط تتحمل مسوول تداع استهداف يمن عسكر يترتب نتايج مجتمع دول تحرك مسوول لمنع توسيع رقع حرب منطق ايرا تلفز اردن		Military		USA issues		Real
الناطق باسم الحوثيين لا مبرر أبدا للعدوان الأمريكي البريطاني على اليمن الاستهداف كان وسيطال باستمرار سفن إسرائيل أو المتجهة إليها	Military	USA issues	Real		Military	Local	Real	الناطق باسم الحوثيين لا مبرر أبدا للعدوان الأمريكي البريطاني على اليمن الاستهداف كان وسيطال باستمرار سفن إسرائيل أو المتجهة إليها	[('', 'الناطق/DTNN'), ('', 'باسم/NNP'), ('', 'الحوثيين/DTJJ'), ('', 'لا/RP'), ('', 'مبرر/NN'), ('', 'أبدا/NN'), ('', 'للعدوان/NNS'), ('', 'الأمريكي/DTNN'), ('', 'البريطاني/DTJJ'), ('', 'على/IN'), ('', 'اليمن/DTNNP'), ('', 'الاستهداف/DTNN'), ('', 'كان/VBD'), ('', 'وسيطال/NN'), ('', 'باستمرار/NN'), ('', 'سفن/NN'), ('', 'إسرائيل/NNP'), ('', 'أو/NNP'), ('', 'المتجهة/VBG'), ('', 'إليها/NN')]	['حزن']	ناطق اسم حوث مبرر عدو امريك بريطان يمن استهداف سيطال استمرار سفن اسراييل متجه ال		Military		USA issues		Real
روسيا تدعو لعقد جلسة طارئة لمجلس الأمن اليوم بشأن الغارات الأمريكية والبريطانية باليمن	Politics	International Relations	Real		Politics	Local	Real	روسيا تدعو لعقد جلسة طارئة لمجلس الأمن اليوم بشأن الغارات الأمريكية والبريطانية باليمن	[('', 'روسيا/NNP'), ('', 'تدعو/VBP'), ('', 'لعقد/NN'), ('', 'جلسة/NN'), ('', 'طارئة/JJ'), ('', 'لمجلس/JJ'), ('', 'الأمن/DTNN'), ('', 'اليوم/DTNN'), ('', 'بشأن/NNP'), ('', 'الغارات/DTNNS'), ('', 'الأمريكية/DTJJ'), ('', 'والبريطانية/NN'), ('', 'باليمن/NNP')]	['حزن']	روس تدع لعقد جلس طارء مجلس امن يوم بشء غار امريك ريطان اليم		Politics		International Relations		Real
الخارجية السعودية المملكة تتابع بقلق بالغ العمليات العسكرية بمنطقة البحر الأحمر والغارات على مواقع في اليمن الخارجية السعودية نؤكد أهمية الحفاظ على أمن واستقرار منطقة البحر الأحمر وندعو لضبط النفس وتجنب التصعيد	Politics	International Relations	Real		Politics	Local	Real	الخارجية السعودية المملكة تتابع بقلق بالغ العمليات العسكرية بمنطقة البحر الأحمر والغارات على مواقع في اليمن الخارجية السعودية نؤكد أهمية الحفاظ على أمن واستقرار منطقة البحر الأحمر وندعو لضبط النفس وتجنب التصعيد	[('', 'الخارجية/DTNN'), ('', 'السعودية/DTJJ'), ('', 'المملكة/DTNN'), ('', 'تتابع/VBP'), ('', 'بقلق/NN'), ('', 'بالغ/NN'), ('', 'العمليات/DTNNS'), ('', 'العسكرية/DTJJ'), ('', 'بمنطقة/NN'), ('', 'البحر/DTNN'), ('', 'الأحمر/DTJJ'), ('', 'والغارات/NNS'), ('', 'على/IN'), ('', 'مواقع/NN'), ('', 'في/IN'), ('', 'اليمن/DTNNP'), ('', 'الخارجية/DTJJ'), ('', 'السعودية/DTJJ'), ('', 'نؤكد/VBP'), ('', 'أهمية/NN…	['Conflicting Emotions Detected']	خارج سعود مملك تتابع قلق الغ عمل عسكر منطق بحر احمر غار مواقع يمن خارج سعود نوكد اهم حفاظ امن واستقرار منطق بحر احمر ندع لضبط نفس تجنب تصعيد		Politics		International Relations		Real
لحظة قصف الطيران الأمريكي على مدينة الحديدة جنوب اليمن	Military	USA issues	Real		Military	Local	Real	لحظة قصف الطيران الأمريكي على مدينة الحديدة جنوب اليمن	[('', 'لحظة/NN'), ('', 'قصف/NN'), ('', 'الطيران/DTNN'), ('', 'الأمريكي/DTJJ'), ('', 'على/IN'), ('', 'مدينة/NN'), ('', 'الحديدة/DTNNP'), ('', 'جنوب/NN'), ('', 'اليمن/DTNNP')]	['No Emotion Detected']	لحظ قصف طير امريك مدين حديد جنوب يمن		Military		USA issues		Real
بيان للتحالف الذي تقوده الولايات المتحدة لن نتردد في حماية تدفق التجارة بأحد أهم الممرات المائية في العالم الضربات باليمن تمت بالتوافق مع ميثاق الأمم المتحدة لن نتردد في حماية تدفق التجارة بأحد أهم الممرات المائية في العالم	Military	USA issues	Real		Military	Local	Real	بيان للتحالف الذي تقوده الولايات المتحدة لن نتردد في حماية تدفق التجارة بأحد أهم الممرات المائية في العالم الضربات باليمن تمت بالتوافق مع ميثاق الأمم المتحدة لن نتردد في حماية تدفق التجارة بأحد أهم الممرات المائية في العالم	[('', 'بيان/NN'), ('', 'للتحالف/NNP'), ('', 'الذي/WP'), ('', 'تقوده/VBP'), ('', 'الولايات/DTNNS'), ('', 'المتحدة/DTJJ'), ('', 'لن/RP'), ('', 'نتردد/VBP'), ('', 'في/IN'), ('', 'حماية/NN'), ('', 'تدفق/NN'), ('', 'التجارة/DTNN'), ('', 'بأحد/NN'), ('', 'أهم/NN'), ('', 'الممرات/DTNNS'), ('', 'المائية/DTJJ'), ('', 'في/IN'), ('', 'العالم/DTNN'), ('', 'الضربات/DTNNS'), ('', 'باليمن/NNP'), ('', 'تمت/VBD')…	['Conflicting Emotions Detected']	بيا تحالف تقود ولا متحد نتردد حما تدفق تجار احد اهم ممر ماء عالم ضرب اليم تمت توافق ميثاق امم متحد نتردد حما تدفق تجار احد اهم ممر ماء عالم		Military		USA issues		Real
عاجل القيادي بأنصار الله الحوثيين عبد الله بن عامر إذا وسعت واشنطن ولندن المعركة فسنضرب قواعدهما بالمنطقة الاردن	Military	USA issues	Real		Military	Local	Real	عاجل القيادي بأنصار الله الحوثيين عبد الله بن عامر إذا وسعت واشنطن ولندن المعركة فسنضرب قواعدهما بالمنطقة الاردن	[('', 'عاجل/JJ'), ('', 'القيادي/DTNN'), ('', 'بأنصار/NNP'), ('', 'الله/NNP'), ('', 'الحوثيين/DTJJ'), ('', 'عبد/NNP'), ('', 'الله/NNP'), ('', 'بن/NNP'), ('', 'عامر/NNP'), ('', 'إذا/NN'), ('', 'وسعت/VBD'), ('', 'واشنطن/NNP'), ('', 'ولندن/NNP'), ('', 'المعركة/DTNN'), ('', 'فسنضرب/NN'), ('', 'قواعدهما/NN'), ('', 'بالمنطقة/JJ'), ('', 'الاردن/DTNNP'), ('', 'التلفزيون/DTNN'), ('', 'الاردني/DTJJ')]	['حزن']	عاجل قياد انصار الله حوث عبد الله بن عامر وسع واشنط لند معرك سنضرب قواعد منطق ارد تلفز اردن		Military		USA issues		Real
عاجل القيادي بقوات أنصار الله الحوثيين عبد الله بن عامر تعرضت مواقع لنا لضربات خاطفة ولن نتردد في الرد لدينا من القدرات ما يتيح لنا الدفاع المشروع عن النفس على واشنطن ولندن تحمل مسؤولية عسكرة البحر الأحمر سنواصل عملياتنا بالبحر الأحمر حتى إنهاء العدوان على غزة الاردن اليمن	Military	USA issues	Real		Military	Local	Real	عاجل القيادي بقوات أنصار الله الحوثيين عبد الله بن عامر تعرضت مواقع لنا لضربات خاطفة ولن نتردد في الرد لدينا من القدرات ما يتيح لنا الدفاع المشروع عن النفس على واشنطن ولندن تحمل مسؤولية عسكرة البحر الأحمر سنواصل عملياتنا بالبحر الأحمر حتى إنهاء العدوان على غزة الاردن اليمن	[('', 'عاجل/JJ'), ('', 'القيادي/DTNN'), ('', 'بقوات/NNP'), ('', 'أنصار/NNP'), ('', 'الله/NNP'), ('', 'الحوثيين/DTJJ'), ('', 'عبد/NNP'), ('', 'الله/NNP'), ('', 'بن/NNP'), ('', 'عامر/NNP'), ('', 'تعرضت/VBD'), ('', 'مواقع/NN'), ('', 'لنا/VBD'), ('', 'لضربات/NNS'), ('', 'خاطفة/JJ'), ('', 'ولن/VBD'), ('', 'نتردد/VBP'), ('', 'في/IN'), ('', 'الرد/DTNN'), ('', 'لدينا/NN'), ('', 'من/IN'), ('', 'القدرات/DT…	['اشمئزاز']	عاجل قياد بقو انصار الله حوث عبد الله بن عامر تعرض مواقع لضرب خاطف ولن نتردد الرد لد قدر يتيح دفاع مشروع نفس واشنط لند تحمل مسوول عسكر بحر احمر سنواصل عمل بحر احمر انهاء عدو غز ارد تلفز اردن يمن		Military		USA issues		Real
عاجل وول ستريت جورنال عن مسؤول أمريكي التحالف الذي تقوده الولايات المتحدة شن أكثر من غارة على أهداف للحوثيين الاردن	Military	USA issues	Real		Military	Local	Real	عاجل وول ستريت جورنال عن مسؤول أمريكي التحالف الذي تقوده الولايات المتحدة شن أكثر من غارة على أهداف للحوثيين الاردن	[('', 'عاجل/JJ'), ('', 'وول/NNP'), ('', 'ستريت/NNP'), ('', 'جورنال/NNP'), ('', 'عن/IN'), ('', 'مسؤول/NN'), ('', 'أمريكي/JJ'), ('', 'التحالف/DTNN'), ('', 'الذي/WP'), ('', 'تقوده/VBP'), ('', 'الولايات/DTNNS'), ('', 'المتحدة/DTJJ'), ('', 'شن/VBD'), ('', 'أكثر/NN'), ('', 'من/IN'), ('', 'غارة/NN'), ('', 'على/IN'), ('', 'أهداف/NN'), ('', 'للحوثيين/NNS'), ('', 'الاردن/DTNNP'), ('', 'التلفزيون/DTNN'), ('…	['حب']	عاجل وول ستر جورنال مسوول امر تحالف تقود ولا متحد شن غار اهداف حوث ارد تلفز اردن		Military		USA issues		Real
عاجل القيادي في أنصار الله الحوثيين علي القحوم نرد الآن بقوة على البوارج الأمريكية والبريطانية في البحر الأحمر الاردن	Military	USA issues	Real		Military	Local	Real	عاجل القيادي في أنصار الله الحوثيين علي القحوم نرد الآن بقوة على البوارج الأمريكية والبريطانية في البحر الأحمر الاردن	[('', 'عاجل/JJ'), ('', 'القيادي/DTNN'), ('', 'في/IN'), ('', 'أنصار/NNP'), ('', 'الله/NNP'), ('', 'الحوثيين/DTJJ'), ('', 'علي/IN'), ('', 'القحوم/DTNN'), ('', 'نرد/VBP'), ('', 'الآن/DTNN'), ('', 'بقوة/NN'), ('', 'على/IN'), ('', 'البوارج/DTNN'), ('', 'الأمريكية/DTJJ'), ('', 'والبريطانية/JJ'), ('', 'في/IN'), ('', 'البحر/DTNN'), ('', 'الأحمر/DTNN'), ('', 'الاردن/DTNNP'), ('', 'التلفزيون/DTNN'), ('', '…	['No Emotion Detected']	عاجل قياد انصار الله حوث عل قحوم نرد بقو بوارج امريك ريطان بحر احمر ارد تلفز اردن		Military		USA issues		Real
عاجل قيادي في جماعة أنصار الله الحوثيين العاصمة صنعاء ومحافظات أخرى تقصف بالطيران الأمريكي والبريطاني الاردن	Military	USA issues	Real		Military	Local	Real	عاجل قيادي في جماعة أنصار الله الحوثيين العاصمة صنعاء ومحافظات أخرى تقصف بالطيران الأمريكي والبريطاني الاردن	[('', 'عاجل/JJ'), ('', 'قيادي/NN'), ('', 'في/IN'), ('', 'جماعة/NN'), ('', 'أنصار/NNP'), ('', 'الله/NNP'), ('', 'الحوثيين/DTJJ'), ('', 'العاصمة/DTNN'), ('', 'صنعاء/NNP'), ('', 'ومحافظات/NNS'), ('', 'أخرى/VBD'), ('', 'تقصف/VBP'), ('', 'بالطيران/NNS'), ('', 'الأمريكي/DTNN'), ('', 'والبريطاني/JJ'), ('', 'الاردن/DTNNP'), ('', 'التلفزيون/DTNN'), ('', 'الاردني/DTJJ')]	['غضب']	عاجل قياد جماع انصار الله حوث عاصم صنعاء محافظ اخرى تقصف طير امريك ريط ارد تلفز اردن		Military		USA issues		Real
عاجل إن بي سي عن مسؤولين أمريكيين عملية مشتركة للجيشين الأمريكي والبريطاني استهدفت مواقع تابعة للحوثيين في اليمن الاردن	Military	USA issues	Real		Military	Local	Real	عاجل إن بي سي عن مسؤولين أمريكيين عملية مشتركة للجيشين الأمريكي والبريطاني استهدفت مواقع تابعة للحوثيين في اليمن الاردن	[('', 'عاجل/JJ'), ('', 'إن/NN'), ('', 'بي/NN'), ('', 'سي/NN'), ('', 'عن/IN'), ('', 'مسؤولين/NNS'), ('', 'أمريكيين/JJ'), ('', 'عملية/NN'), ('', 'مشتركة/JJ'), ('', 'للجيشين/NNS'), ('', 'الأمريكي/DTNN'), ('', 'والبريطاني/JJ'), ('', 'استهدفت/VBD'), ('', 'مواقع/NN'), ('', 'تابعة/JJ'), ('', 'للحوثيين/JJ'), ('', 'في/IN'), ('', 'اليمن/DTNNP'), ('', 'الاردن/DTNNP'), ('', 'التلفزيون/DTNN'), ('', 'الاردني/D…	['Conflicting Emotions Detected']	عاجل سي مسوول امريك عمل مشترك جيش امريك ريط استهدف مواقع تابع حوث يمن ارد تلفز اردن		Military		USA issues		Real
عاجل رويترز أمريكا وبريطانيا بدأتا شن ضربات ضد أهداف للحوثيين في اليمن الاردن التفزيون الاردني	Military	USA issues	Real		Military	Local	Real	عاجل رويترز أمريكا وبريطانيا بدأتا شن ضربات ضد أهداف للحوثيين في اليمن الاردن التفزيون الاردني	[('', 'عاجل/JJ'), ('', 'رويترز/NNP'), ('', 'أمريكا/NNP'), ('', 'وبريطانيا/NN'), ('', 'بدأتا/NN'), ('', 'شن/NN'), ('', 'ضربات/NNS'), ('', 'ضد/NN'), ('', 'أهداف/NN'), ('', 'للحوثيين/JJ'), ('', 'في/IN'), ('', 'اليمن/DTNNP'), ('', 'الاردن/DTNNP'), ('', 'التفزيون/DTJJ'), ('', 'الاردني/DTJJ')]	['No Emotion Detected']	عاجل رويترز امر ريطان بدء شن ضرب ضد اهداف حوث يمن ارد تفز اردن		Military		USA issues		Real
مسارات إتصال هاتفي مع د عمر الجازي الخبير القانوني والمحكم الدولي لاهاي	Law	Local	Real		Law	Local	Real	مسارات إتصال هاتفي مع د عمر الجازي الخبير القانوني والمحكم الدولي لاهاي	[('', 'مسارات/NNS'), ('', 'إتصال/NN'), ('', 'هاتفي/JJ'), ('', 'مع/NN'), ('', 'د/NN'), ('', 'عمر/NNP'), ('', 'الجازي/DTNNP'), ('', 'الخبير/DTJJ'), ('', 'القانوني/DTJJ'), ('', 'والمحكم/NN'), ('', 'الدولي/DTJJ'), ('', 'لاهاي/NNP')]	['No Emotion Detected']	مسار اتصال هاتف عمر جاز خبير قانون والمح دول لاها		Law		Local		Real
وصول مرتبات المستشفى الميداني الأردني غزة لأرض الوطن وصلت مرتبات المستشفى الميداني الأردني غزة اليوم الخميس إلى أرض الوطن بعد أن أدت واجبها الإنساني والطبي تجاه الأهل والأشقاء في قطاع غزة وتأتي مشاركة مرتبات المستشفى الميداني في غزة ضمن الجهود التي تبذلها القوات المسلحة الأردنية ــ الجيش العربي في دعم ومساندة الأهل والأشقاء في ظل العدوان الإسرائيلي المستمر على القطاع وكانت قد غادرت أرض الوطن أمس …	Health	Israeli-Palestinian Conflict	Real		Health	Local	Real	وصول مرتبات المستشفى الميداني الأردني غزة لأرض الوطن وصلت مرتبات المستشفى الميداني الأردني غزة اليوم الخميس إلى أرض الوطن بعد أن أدت واجبها الإنساني والطبي تجاه الأهل والأشقاء في قطاع غزة وتأتي مشاركة مرتبات المستشفى الميداني في غزة ضمن الجهود التي تبذلها القوات المسلحة الأردنية ــ الجيش العربي في دعم ومساندة الأهل والأشقاء في ظل العدوان الإسرائيلي المستمر على القطاع وكانت قد غادرت أرض الوطن أمس …	[('', 'وصول/NN'), ('', 'مرتبات/NNS'), ('', 'المستشفى/DTNN'), ('', 'الميداني/DTJJ'), ('', 'الأردني/DTJJ'), ('', 'غزة/NNP'), ('', 'لأرض/NN'), ('', 'الوطن/DTNN'), ('', 'وصلت/VBD'), ('', 'مرتبات/NNS'), ('', 'المستشفى/DTNN'), ('', 'الميداني/DTJJ'), ('', 'الأردني/DTJJ'), ('', 'غزة/NNP'), ('', 'اليوم/DTNN'), ('', 'الخميس/DTNN'), ('', 'إلى/VBD'), ('', 'أرض/NN'), ('', 'الوطن/DTNN'), ('', 'بعد/NN'), ('', '…	['Conflicting Emotions Detected']	صول مرتب مستشفى ميدان اردن غز لارض وطن وصل مرتب مستشفى ميدان اردن غز يوم خميس ارض وطن ادت واجب انسان والطب اهل اشقاء قطاع غز وتء مشارك مرتب مستشفى ميدان غز ضمن جهود تبذل القو مسلح اردن جيش عرب دعم مساند اهل اشقاء ظل عدو اسراييل مستمر قطاع كان غادر ارض وطن اول مرتب مستشفى ميدان اردن غز اداء واجب انسان والطب تقديم يد عون مساعد اهل اشقاء قطاع يشار القو مسلح اردن ارسل مستشفى ميدان قطاع غز عام تقديم خ…		Health		Israeli-Palestinian Conflict		Real
العالم يحاول التعبير عن دعمه لغزة بطرق عديدة وغير مألوفة الأردن تريند شو غزة	Society	International	Real		Society	Local	Real	العالم يحاول التعبير عن دعمه لغزة بطرق عديدة وغير مألوفة الأردن تريند شو غزة	[('', 'العالم/DTNN'), ('', 'يحاول/VBP'), ('', 'التعبير/DTNN'), ('', 'عن/IN'), ('', 'دعمه/NN'), ('', 'لغزة/NN'), ('', 'بطرق/NN'), ('', 'عديدة/JJ'), ('', 'وغير/NN'), ('', 'مألوفة/JJ'), ('', 'الأردن/DTNN'), ('', 'التلفزيون/DTNN'), ('', 'الأردني/DTJJ'), ('', 'تريند/NNP'), ('', 'شو/NNP'), ('', 'غزة/NNP')]	['سعادة']	عالم يحاول تعبير دعم لغز طرق عديد غير مالوف ارد تلفز اردن تريند شو غز		Society		International		Real
حديث سمو الأمير الحسين بن عبدالله الثاني ولي العهد خلال إطلاق منتدى تكنولوجيا المعلومات والاتصالات الأردني السنغافوري	Technology	Local	Real		Technology	Local	Real	حديث سمو الأمير الحسين بن عبدالله الثاني ولي العهد خلال إطلاق منتدى تكنولوجيا المعلومات والاتصالات الأردني السنغافوري	[('', 'حديث/NN'), ('', 'سمو/NN'), ('', 'الأمير/DTNN'), ('', 'الحسين/DTNNP'), ('', 'بن/NNP'), ('', 'عبدالله/NNP'), ('', 'الثاني/DTNNP'), ('', 'ولي/NN'), ('', 'العهد/DTNN'), ('', 'خلال/NN'), ('', 'إطلاق/NN'), ('', 'منتدى/NN'), ('', 'تكنولوجيا/NN'), ('', 'المعلومات/DTNNS'), ('', 'والاتصالات/NNS'), ('', 'الأردني/DTNN'), ('', 'السنغافوري/DTJJ')]	['حزن']	حديث سمو امير الحس بن عبدالل ثان ول عهد خلال اطلاق منتدى تكنولوج معلوم اتصال اردن سنغافور		Technology		Local		Real
رسالة الوداع الأخيرة لحمزة الدحدوح الأردن تريند شو غزة	Humanitarian	Personal Stories	Real		Humanitarian	Local	Real	رسالة الوداع الأخيرة لحمزة الدحدوح الأردن تريند شو غزة	[('', 'رسالة/NN'), ('', 'الوداع/DTNN'), ('', 'الأخيرة/DTJJ'), ('', 'لحمزة/NN'), ('', 'الدحدوح/DTNN'), ('', 'الأردن/DTJJ'), ('', 'التلفزيون/DTNN'), ('', 'الأردني/DTJJ'), ('', 'تريند/NNP'), ('', 'شو/NNP'), ('', 'غزة/NNP')]	['سعادة']	رسال وداع اخير لحمز دحدوح ارد تلفز اردن تريند شو غز		Humanitarian		Personal Stories		Real
عملية إنزال أردنية فرنسية على قطاع غزة الأردن تريند شو غزة	Military	Aid	Real		Military	Local	Real	عملية إنزال أردنية فرنسية على قطاع غزة الأردن تريند شو غزة	[('', 'عملية/NN'), ('', 'إنزال/NN'), ('', 'أردنية/JJ'), ('', 'فرنسية/JJ'), ('', 'على/IN'), ('', 'قطاع/NN'), ('', 'غزة/NNP'), ('', 'الأردن/DTNNP'), ('', 'التلفزيون/DTNN'), ('', 'الأردني/DTJJ'), ('', 'تريند/NNP'), ('', 'شو/NNP'), ('', 'غزة/NNP')]	['حزن']	عمل انزال اردن رنس قطاع غز ارد تلفز اردن تريند شو غز		Military		Aid		Real
محكمة العدل الدولية المختصة بالنزاعات الدولية	Law	International	Real		Law	Local	Real	محكمة العدل الدولية المختصة بالنزاعات الدولية	[('', 'محكمة/NN'), ('', 'العدل/DTNN'), ('', 'الدولية/DTJJ'), ('', 'المختصة/DTJJ'), ('', 'بالنزاعات/NNS'), ('', 'الدولية/DTJJ')]	['No Emotion Detected']	محكم عدل دول مختص نزاع دول		Law		International		Real
جلالة الملكة رانيا العبدالله تنشر فيديو لوداع حمزة الدحدوح الأردن تريند شو غزة	Humanitarian	Personal Stories	Real		Humanitarian	Local	Real	جلالة الملكة رانيا العبدالله تنشر فيديو لوداع حمزة الدحدوح الأردن تريند شو غزة	[('', 'جلالة/NN'), ('', 'الملكة/DTNN'), ('', 'رانيا/NNP'), ('', 'العبدالله/DTNNP'), ('', 'تنشر/VBP'), ('', 'فيديو/NN'), ('', 'لوداع/NNP'), ('', 'حمزة/NNP'), ('', 'الدحدوح/DTNNP'), ('', 'الأردن/DTJJ'), ('', 'التلفزيون/DTNN'), ('', 'الأردني/DTJJ'), ('', 'تريند/NNP'), ('', 'شو/NNP'), ('', 'غزة/NNP')]	['Conflicting Emotions Detected']	جلال ملك ران عبدالله تنشر فيد وداع حمز دحدوح ارد تلفز اردن تريند شو غز		Humanitarian		Personal Stories		Real
غور الصافي الخصاونة يطلع على عدد من مشروعات شركة البوتاس العربية الاردن	Economy	Local	Real		Economy	Local	Real	غور الصافي الخصاونة يطلع على عدد من مشروعات شركة البوتاس العربية الاردن	[('', 'غور/NNP'), ('', 'الصافي/DTNNP'), ('', 'الخصاونة/DTJJ'), ('', 'يطلع/VBP'), ('', 'على/IN'), ('', 'عدد/NN'), ('', 'من/IN'), ('', 'مشروعات/NNS'), ('', 'شركة/NN'), ('', 'البوتاس/DTNN'), ('', 'العربية/DTJJ'), ('', 'الاردن/DTNNP'), ('', 'التلفزيون/DTNN'), ('', 'الأردني/DTJJ')]	['اشمئزاز']	غور صاف خصاون يطلع عدد مشروع شرك بوتاس عرب ارد تلفز اردن		Economy		Local		Real
غور الصافي الخصاونة عجلة الاقتصاد والتنمية يجب أن لا تتوقف لتحقيق منعة الاقتصاد الاردن	Economy	Local	Real		Economy	Local	Real	غور الصافي الخصاونة عجلة الاقتصاد والتنمية يجب أن لا تتوقف لتحقيق منعة الاقتصاد الاردن	[('', 'غور/NNP'), ('', 'الصافي/DTNNP'), ('', 'الخصاونة/DTNNP'), ('', 'عجلة/NN'), ('', 'الاقتصاد/DTNN'), ('', 'والتنمية/JJ'), ('', 'يجب/VBP'), ('', 'أن/NN'), ('', 'لا/RP'), ('', 'تتوقف/VBP'), ('', 'لتحقيق/NN'), ('', 'منعة/NN'), ('', 'الاقتصاد/DTNN'), ('', 'الاردن/DTNNP'), ('', 'التلفزيون/DTNN'), ('', 'الأردني/DTJJ')]	['No Emotion Detected']	غور صاف خصاون عجل اقتصاد تنم يجب تتوقف تحقيق منع اقتصاد ارد تلفز اردن		Economy		Local		Real
سمو ولي العهد يرعى إطلاق منتدى تكنولوجيا المعلومات والاتصالات الأردني السنغافوري الاردن	Technology	International	Real		Technology	Local	Real	سمو ولي العهد يرعى إطلاق منتدى تكنولوجيا المعلومات والاتصالات الأردني السنغافوري الاردن	[('', 'سمو/NN'), ('', 'ولي/NN'), ('', 'العهد/DTNN'), ('', 'يرعى/VBP'), ('', 'إطلاق/NN'), ('', 'منتدى/NN'), ('', 'تكنولوجيا/NN'), ('', 'المعلومات/DTNNS'), ('', 'والاتصالات/NNS'), ('', 'الأردني/DTNN'), ('', 'السنغافوري/DTJJ'), ('', 'الاردن/DTNNP'), ('', 'التلفزيون/DTNN'), ('', 'الأردني/DTJJ')]	['No Emotion Detected']	سمو ول عهد يرعى اطلاق منتدى تكنولوج معلوم اتصال اردن سنغافور ارد تلفز اردن		Technology		International		Real
محافظة المفرق إشادة شعبية ورسمية بدور جلالة الملك بالوقوف إلى جانب الأشقاء بغزة الاردن غزة	Government	Diplomacy Relations	Real		Government	Local	Real	محافظة المفرق إشادة شعبية ورسمية بدور جلالة الملك بالوقوف إلى جانب الأشقاء بغزة الاردن غزة	[('', 'محافظة/NN'), ('', 'المفرق/DTNN'), ('', 'إشادة/NN'), ('', 'شعبية/NN'), ('', 'ورسمية/JJ'), ('', 'بدور/NN'), ('', 'جلالة/NN'), ('', 'الملك/DTNN'), ('', 'بالوقوف/NNP'), ('', 'إلى/VBD'), ('', 'جانب/NN'), ('', 'الأشقاء/DTNN'), ('', 'بغزة/NN'), ('', 'الاردن/DTNNP'), ('', 'التلفزيون/DTNN'), ('', 'الأردني/DTJJ'), ('', 'غزة/NNP')]	['Conflicting Emotions Detected']	محافظ مفرق اشاد شعب رسم دور جلال ملك وقوف جانب اشقاء بغز ارد تلفز اردن غز		Government		Diplomacy Relations		Real
عاجل جلالة الملك يتلقى اتصالا من أمين عام الأمم المتحدة ويؤكد أهمية المنظمات الأممية في الاستجابة الإنسانية في غزة جلالة الملك يعيد التأكيد على موقف الأردن الرافض لتهجير الفلسطينيين في غزة والضفة الغربية مشددا على ضرورة التصدي لهذه المحاولات وتمكين الغزيين من العودة إلى بيوتهم جلالة الملك يحذر من التبعات الكارثية لتوسيع دائرة الصراع لتمتد إلى الإقليم داعيا المجتمع الدولي إلى الالتفات إلى التصعيد …	Politics	Israeli-Palestinian Conflict	Real		Politics	Local	Real	عاجل جلالة الملك يتلقى اتصالا من أمين عام الأمم المتحدة ويؤكد أهمية المنظمات الأممية في الاستجابة الإنسانية في غزة جلالة الملك يعيد التأكيد على موقف الأردن الرافض لتهجير الفلسطينيين في غزة والضفة الغربية مشددا على ضرورة التصدي لهذه المحاولات وتمكين الغزيين من العودة إلى بيوتهم جلالة الملك يحذر من التبعات الكارثية لتوسيع دائرة الصراع لتمتد إلى الإقليم داعيا المجتمع الدولي إلى الالتفات إلى التصعيد …	[('', 'عاجل/JJ'), ('', 'جلالة/NN'), ('', 'الملك/DTNN'), ('', 'يتلقى/VBP'), ('', 'اتصالا/NN'), ('', 'من/IN'), ('', 'أمين/NNS'), ('', 'عام/NN'), ('', 'الأمم/DTNN'), ('', 'المتحدة/DTJJ'), ('', 'ويؤكد/NNP'), ('', 'أهمية/NN'), ('', 'المنظمات/DTNNS'), ('', 'الأممية/DTJJ'), ('', 'في/IN'), ('', 'الاستجابة/DTNN'), ('', 'الإنسانية/DTJJ'), ('', 'في/IN'), ('', 'غزة/NNP'), ('', 'جلالة/NNP'), ('', 'الملك/DTNN'…	['Conflicting Emotions Detected']	عاجل جلال ملك يتلقى اتصال ام عام امم متحد يوكد اهم منظم امم استجاب انسان غز جلال ملك يعيد تاكيد موقف ارد رافض تهجير فلسطين غز والضف غرب مشدد ضرور تصد لهذ محاول تمك الغز عود بيو جلال ملك يحذر تبع كارث توسيع داير صراع تمتد اقليم داع مجتمع دول التف تصعيد خطير ضد فلسطين الضف غرب قدس جلال ملك يشدد رفض ارد محاول تصف القض فلسطين فصل غز والضف غرب تشكل امتداد دول فلسطين واحد ارد تلفز اردن غز		Politics		Israeli-Palestinian Conflict		Real
غزة في المواجهة وزير الداخلية يبحث الأوضاع الجارية مع نظيره الفلسطيني الاردن غزة	Government	Diplomacy Relations	Real		Government	Local	Real	غزة في المواجهة وزير الداخلية يبحث الأوضاع الجارية مع نظيره الفلسطيني الاردن غزة	[('', 'غزة/NNP'), ('', 'في/IN'), ('', 'المواجهة/DTNN'), ('', 'وزير/NN'), ('', 'الداخلية/DTNN'), ('', 'يبحث/VBP'), ('', 'الأوضاع/DTNN'), ('', 'الجارية/DTJJ'), ('', 'مع/NN'), ('', 'نظيره/NN'), ('', 'الفلسطيني/DTNN'), ('', 'الاردن/DTNNP'), ('', 'التلفزيون/DTNN'), ('', 'الأردني/DTJJ'), ('', 'غزة/NNP')]	['No Emotion Detected']	غز مواجه زير داخل يبحث اوضاع جار نظير فلسطين ارد تلفز اردن غز		Government		Diplomacy Relations		Real
غور الصافي إطلاق استراتيجية شركة البوتاس وافتتاح مبنى الإدارة العامة الجديدة للشركة الاردن	Economy	Local	Real		Economy	Local	Real	غور الصافي إطلاق استراتيجية شركة البوتاس وافتتاح مبنى الإدارة العامة الجديدة للشركة الاردن	[('', 'غور/NNP'), ('', 'الصافي/DTNNP'), ('', 'إطلاق/NN'), ('', 'استراتيجية/JJ'), ('', 'شركة/NN'), ('', 'البوتاس/DTNN'), ('', 'وافتتاح/NNP'), ('', 'مبنى/NN'), ('', 'الإدارة/DTNN'), ('', 'العامة/DTJJ'), ('', 'الجديدة/DTJJ'), ('', 'للشركة/NN'), ('', 'الاردن/DTNNP'), ('', 'التلفزيون/DTNN'), ('', 'الأردني/DTJJ')]	['اشمئزاز']	غور صاف اطلاق استراتيج شرك بوتاس وافتتاح مبنى ادار عام جديد شرك ارد تلفز اردن		Economy		Local		Real
عاجل المقررة الأممية لحقوق الإنسان في فلسطين لم نر حتى الآن الرد المناسب بشأن ما يتعرض له سكان غزة يجب ضمان عدم حصول مزيد من انتهاكات القانون الدولي في غزة لإسرائيل حق الدفاع عن نفسها لكن لا حق لها في استهداف المدنيين قرارات العدل الدولية ملزمة للدول وإسرائيل عليها الالتزام بها الاردن غزة	Humanitarian	Israeli-Palestinian Conflict	Real		Humanitarian	Local	Real	عاجل المقررة الأممية لحقوق الإنسان في فلسطين لم نر حتى الآن الرد المناسب بشأن ما يتعرض له سكان غزة يجب ضمان عدم حصول مزيد من انتهاكات القانون الدولي في غزة لإسرائيل حق الدفاع عن نفسها لكن لا حق لها في استهداف المدنيين قرارات العدل الدولية ملزمة للدول وإسرائيل عليها الالتزام بها الاردن غزة	[('', 'عاجل/JJ'), ('', 'المقررة/VN'), ('', 'الأممية/DTNN'), ('', 'لحقوق/NN'), ('', 'الإنسان/DTNN'), ('', 'في/IN'), ('', 'فلسطين/NNP'), ('', 'لم/RP'), ('', 'نر/VBP'), ('', 'حتى/IN'), ('', 'الآن/DTNN'), ('', 'الرد/DTNN'), ('', 'المناسب/DTJJ'), ('', 'بشأن/NNP'), ('', 'ما/WP'), ('', 'يتعرض/VBP'), ('', 'له/NN'), ('', 'سكان/NN'), ('', 'غزة/NNP'), ('', 'يجب/VBP'), ('', 'ضمان/NN'), ('', 'عدم/NN'), ('', '…	['غضب']	عاجل مقرر امم حقوق انس لسط نر الرد مناسب بشء يتعرض سكا غز يجب ضما عدم حصول مزيد انتهاك قان دول غز اسراييل حق دفاع نفس حق استهداف مدن قرار عدل دول ملزم دول اسراييل عل التزام ارد تلفز اردن غز		Humanitarian		Israeli-Palestinian Conflict		Real
وزير الداخلية يبحث الأوضاع الجارية مع نظيره الفلسطيني بحث وزير الداخلية مازن الفراية في مقر الوزارة اليوم الخميس مع وزير الداخلية الفلسطيني زياد هب الريح والوفد المرافق له سبل التعاون والتنسيق بين الوزارتين في كلا البلدين وقال الفراية ان هذا اللقاء يأتي ونحن نشعر بالحزن والالم تجاه المأساة الانسانية المستمرة في قطاع غزة والتي راح ضحيتها الكثير من الشهداء أغلبهم من النساء والاطفال الابرياء وكذلك ا…	Humanitarian	Israeli-Palestinian Conflict	Real		Humanitarian	Local	Real	وزير الداخلية يبحث الأوضاع الجارية مع نظيره الفلسطيني بحث وزير الداخلية مازن الفراية في مقر الوزارة اليوم الخميس مع وزير الداخلية الفلسطيني زياد هب الريح والوفد المرافق له سبل التعاون والتنسيق بين الوزارتين في كلا البلدين وقال الفراية ان هذا اللقاء يأتي ونحن نشعر بالحزن والالم تجاه المأساة الانسانية المستمرة في قطاع غزة والتي راح ضحيتها الكثير من الشهداء أغلبهم من النساء والاطفال الابرياء وكذلك ا…	[('', 'وزير/NN'), ('', 'الداخلية/DTNN'), ('', 'يبحث/VBP'), ('', 'الأوضاع/DTNN'), ('', 'الجارية/DTJJ'), ('', 'مع/NN'), ('', 'نظيره/NN'), ('', 'الفلسطيني/DTNN'), ('', 'بحث/VBD'), ('', 'وزير/NN'), ('', 'الداخلية/DTNN'), ('', 'مازن/NNP'), ('', 'الفراية/DTNNP'), ('', 'في/IN'), ('', 'مقر/NN'), ('', 'الوزارة/DTNN'), ('', 'اليوم/DTNN'), ('', 'الخميس/DTNN'), ('', 'مع/NN'), ('', 'وزير/NN'), ('', 'الداخلية/…	['Conflicting Emotions Detected']	زير داخل يبحث اوضاع جار نظير فلسطين بحث زير داخل ماز فرا مقر وزار يوم خميس زير داخل فلسطين زياد هب ريح وفد مرافق سبل تعا تنسيق وزارت بلد قال فرا ان لقاء يات ونح نشعر الحز الم ماسا انسان مستمر قطاع غز وال ضح كثير شهداء اغلب نساء اطفال ابرياء كذل حال بشء تزايد اعداد جرحى مصاب نتمنى شفاء عاجل قال فرايه ان تدمير ممنهج لكل مقوم حيا غز شكل ماسا شكل صدم ضمير عالم انسان ووج ضرب نظام عالم قيم مبادء اشار ا…		Humanitarian		Israeli-Palestinian Conflict		Real
غزة في المواجهة شهيد في مجزرة خلال الساعات الــ الماضية الاردن غزة	Politics	Israeli-Palestinian Conflict	Real		Politics	Local	Real	غزة في المواجهة شهيد في مجزرة خلال الساعات الــ الماضية الاردن غزة	[('', 'غزة/NNP'), ('', 'في/IN'), ('', 'المواجهة/DTNN'), ('', 'شهيد/NN'), ('', 'في/IN'), ('', 'مجزرة/NN'), ('', 'خلال/NN'), ('', 'الساعات/DTNNS'), ('', 'الــ/DTJJ'), ('', 'الماضية/DTJJ'), ('', 'الاردن/DTNNP'), ('', 'التلفزيون/DTNN'), ('', 'الأردني/DTJJ'), ('', 'غزة/NNP')]	['No Emotion Detected']	غز مواجه شهيد مجزر خلال ساع ال ماض ارد تلفز اردن غز		Politics		Israeli-Palestinian Conflict		Real
غزة في المواجهة إسرائيل أمام محكمة العدل الدولية بتهمة الإبادة في غزة الاردن غزة	Politics	Israeli-Palestinian Conflict	Real		Politics	Local	Real	غزة في المواجهة إسرائيل أمام محكمة العدل الدولية بتهمة الإبادة في غزة الاردن غزة	[('', 'غزة/NNP'), ('', 'في/IN'), ('', 'المواجهة/DTNN'), ('', 'إسرائيل/NNP'), ('', 'أمام/NNP'), ('', 'محكمة/NN'), ('', 'العدل/DTNN'), ('', 'الدولية/DTJJ'), ('', 'بتهمة/NN'), ('', 'الإبادة/DTNN'), ('', 'في/IN'), ('', 'غزة/NNP'), ('', 'الاردن/DTNNP'), ('', 'التلفزيون/DTNN'), ('', 'الأردني/DTJJ'), ('', 'غزة/NNP')]	['حزن']	غز مواجه اسراييل محكم عدل دول تهم اباد غز ارد تلفز اردن غز		Politics		Israeli-Palestinian Conflict		Real
مسارات الدكتور حسن البراري تمكين الفلسطينيين وبقائهم على أراضيهم هزيمة للمشروع الصهيوني القمة الثلاثية جاءت للتأكيد على الخطوط الحمراء التي وضعت اردنيا وفلسطينيا ومصريا الاردن غزة	Politics	Israeli-Palestinian Conflict	Real		Politics	Local	Real	مسارات الدكتور حسن البراري تمكين الفلسطينيين وبقائهم على أراضيهم هزيمة للمشروع الصهيوني القمة الثلاثية جاءت للتأكيد على الخطوط الحمراء التي وضعت اردنيا وفلسطينيا ومصريا الاردن غزة	[('', 'مسارات/NNS'), ('', 'الدكتور/DTNN'), ('', 'حسن/NNP'), ('', 'البراري/DTNN'), ('', 'تمكين/NN'), ('', 'الفلسطينيين/DTNNS'), ('', 'وبقائهم/NN'), ('', 'على/IN'), ('', 'أراضيهم/NN'), ('', 'هزيمة/NN'), ('', 'للمشروع/DTNN'), ('', 'الصهيوني/DTJJ'), ('', 'القمة/DTNN'), ('', 'الثلاثية/DTJJ'), ('', 'جاءت/VBD'), ('', 'للتأكيد/NNP'), ('', 'على/IN'), ('', 'الخطوط/DTNN'), ('', 'الحمراء/DTJJ'), ('', 'التي/W…	['حزن']	مسار دكتور حسن برار تمك فلسطين قاء اراض هزيم مشروع صهيون القم ثلاث جاء تاكيد خطوط حمراء وضع اردن فلسطين مصر ارد تلفز اردن غز		Politics		Israeli-Palestinian Conflict		Real
عاجل وسائل إعلام إيرانية البحرية الإيرانية تحتجز ناقلة نفط أمريكية في بحر عمان بموجب حكم قضائي الأردن	Military	USA issues	Real		Military	Local	Real	عاجل وسائل إعلام إيرانية البحرية الإيرانية تحتجز ناقلة نفط أمريكية في بحر عمان بموجب حكم قضائي الأردن	[('', 'عاجل/JJ'), ('', 'وسائل/NN'), ('', 'إعلام/NN'), ('', 'إيرانية/JJ'), ('', 'البحرية/DTNN'), ('', 'الإيرانية/DTJJ'), ('', 'تحتجز/VBP'), ('', 'ناقلة/NN'), ('', 'نفط/NN'), ('', 'أمريكية/JJ'), ('', 'في/IN'), ('', 'بحر/NN'), ('', 'عمان/NNP'), ('', 'بموجب/NNP'), ('', 'حكم/NN'), ('', 'قضائي/JJ'), ('', 'الأردن/DTNN'), ('', 'التلفزيون/DTNN'), ('', 'الأردني/DTJJ')]	['No Emotion Detected']	عاجل سايل اعلام ايران بحر ايران تحتجز ناقل نفط امريك بحر عما موجب حكم قضاء ارد تلفز اردن		Military		USA issues		Real
جنوب إفريقيا طالبت بالتعليق الفوري للعمليات العسكرية الإسرائيلية في قطاع غزة الأردن	Politics	Israeli-Palestinian Conflict	Real		Politics	Local	Real	جنوب إفريقيا طالبت بالتعليق الفوري للعمليات العسكرية الإسرائيلية في قطاع غزة الأردن	[('', 'جنوب/NN'), ('', 'إفريقيا/JJ'), ('', 'طالبت/VBD'), ('', 'بالتعليق/NNP'), ('', 'الفوري/DTJJ'), ('', 'للعمليات/NNS'), ('', 'العسكرية/DTNN'), ('', 'الإسرائيلية/DTJJ'), ('', 'في/IN'), ('', 'قطاع/NN'), ('', 'غزة/NNP'), ('', 'الأردن/DTNNP'), ('', 'التلفزيون/DTNN'), ('', 'الأردني/DTJJ')]	['No Emotion Detected']	جنوب افريق طالب تعليق فور عمل عسكر اسراييل قطاع غز ارد تلفز اردن		Politics		Israeli-Palestinian Conflict		Real
عاجل الفريق القانوني لجنوب إفريقيا دولة عبرت عن دعمها للقضية ما يؤكد ضرورة اتخاذ المحكمة تدابير مؤقتة واجب الدول الأعضاء في اتفاقية منع الإبادة منع ارتكابها ومعاقبة مرتكبيها امرأة و طفلا في قطاع غزة يقتلون بمعدل يومي أكثر من أطفال في قطاع غزة يفقدون يوميا طرفا واحدا على الأقل من أطرافهم قرار مجلس الأمن الدولي بتيسير وصول المساعدات إلى غزة لم يتم تنفيذه نقص الدواء والماء والكهرباء في قطاع غزة يهدد…	Politics	Israeli-Palestinian Conflict	Real		Politics	Local	Real	عاجل الفريق القانوني لجنوب إفريقيا دولة عبرت عن دعمها للقضية ما يؤكد ضرورة اتخاذ المحكمة تدابير مؤقتة واجب الدول الأعضاء في اتفاقية منع الإبادة منع ارتكابها ومعاقبة مرتكبيها امرأة و طفلا في قطاع غزة يقتلون بمعدل يومي أكثر من أطفال في قطاع غزة يفقدون يوميا طرفا واحدا على الأقل من أطرافهم قرار مجلس الأمن الدولي بتيسير وصول المساعدات إلى غزة لم يتم تنفيذه نقص الدواء والماء والكهرباء في قطاع غزة يهدد…	[('', 'عاجل/JJ'), ('', 'الفريق/DTNN'), ('', 'القانوني/DTJJ'), ('', 'لجنوب/NNP'), ('', 'إفريقيا/NNP'), ('', 'دولة/NN'), ('', 'عبرت/VBD'), ('', 'عن/IN'), ('', 'دعمها/NN'), ('', 'للقضية/JJ'), ('', 'ما/IN'), ('', 'يؤكد/VBP'), ('', 'ضرورة/NN'), ('', 'اتخاذ/NN'), ('', 'المحكمة/DTNN'), ('', 'تدابير/NN'), ('', 'مؤقتة/JJ'), ('', 'واجب/NN'), ('', 'الدول/DTNN'), ('', 'الأعضاء/DTJJ'), ('', 'في/IN'), ('', 'ات…	['Conflicting Emotions Detected']	عاجل فريق قانون جنوب افريق دول عبر دعم للقض يوكد ضرور اتخاذ محكم تدابير موقت واجب دول اعضاء اتفاق منع اباد منع ارتكاب معاقب مرتكب امرء طفل قطاع غز يقتل معدل يوم اطفال قطاع غز يفقد يوم طرف واحد اقل اطراف قرار مجلس امن دول تيسير صول مساعد غز يتم تنفيذ نقص دواء ماء هرباء قطاع غز يهدد الاف ارد تلفز اردن		Politics		Israeli-Palestinian Conflict		Real
مليارات دينار حجم التداول العقاري في المملكة خلال العام الماضي الأردن	Economy	Financial Policies	Real		Economy	Local	Real	مليارات دينار حجم التداول العقاري في المملكة خلال العام الماضي الأردن	[('', 'مليارات/NNS'), ('', 'دينار/NN'), ('', 'حجم/NN'), ('', 'التداول/DTNN'), ('', 'العقاري/DTJJ'), ('', 'في/IN'), ('', 'المملكة/DTNN'), ('', 'خلال/NN'), ('', 'العام/DTNN'), ('', 'الماضي/DTJJ'), ('', 'الأردن/DTNN'), ('', 'التلفزيون/DTNN'), ('', 'الأردني/DTJJ')]	['حزن']	مليار حجم تداول عقار مملك خلال عام ماض ارد تلفز اردن		Economy		Financial Policies		Real
الحديث عن جلسة محكمة العدل الدولية والإبادة الجماعية التى يقوم بها الاحتلال في غزة الوزير السابق محمود الخرابشة الاردن	Law	International	Real		Law	Local	Real	الحديث عن جلسة محكمة العدل الدولية والإبادة الجماعية التى يقوم بها الاحتلال في غزة الوزير السابق محمود الخرابشة الاردن	[('', 'الحديث/DTNN'), ('', 'عن/IN'), ('', 'جلسة/NN'), ('', 'محكمة/NN'), ('', 'العدل/DTNN'), ('', 'الدولية/DTJJ'), ('', 'والإبادة/NNP'), ('', 'الجماعية/DTJJ'), ('', 'التى/WP'), ('', 'يقوم/VBP'), ('', 'بها/NN'), ('', 'الاحتلال/DTNN'), ('', 'في/IN'), ('', 'غزة/NNP'), ('', 'الوزير/DTNN'), ('', 'السابق/DTJJ'), ('', 'محمود/NNP'), ('', 'الخرابشة/DTNNP'), ('', 'التلفزيون/DTNN'), ('', 'الأردني/DTJJ'), (''…	['غضب']	حديث جلس محكم عدل دول اباد جماع التى يقوم احتلال غز وزير سابق محمود خرابش تلفز اردن ارد		Law		International		Real
مستوطنون متطرفون يجرفون أراضي الفلسطينيين في الخليل الأردن	Politics	Israeli-Palestinian Conflict	Real		Politics	Local	Real	مستوطنون متطرفون يجرفون أراضي الفلسطينيين في الخليل الأردن	[('', 'مستوطنون/NNS'), ('', 'متطرفون/JJ'), ('', 'يجرفون/VBP'), ('', 'أراضي/NNS'), ('', 'الفلسطينيين/DTNNS'), ('', 'في/IN'), ('', 'الخليل/DTNNP'), ('', 'الأردن/DTNN'), ('', 'التلفزيون/DTNN'), ('', 'الأردني/DTJJ')]	['No Emotion Detected']	مستوطن متطرف يجرف اراض فلسطين خليل ارد تلفز اردن		Politics		Israeli-Palestinian Conflict		Real
الخارجية الفلسطينية تطالب بدعم مرافعة جنوب إفريقيا في محكمة العدل الدولية الأردن	Politics	International	Real		Politics	Local	Real	الخارجية الفلسطينية تطالب بدعم مرافعة جنوب إفريقيا في محكمة العدل الدولية الأردن	[('', 'الخارجية/DTNN'), ('', 'الفلسطينية/DTJJ'), ('', 'تطالب/VBP'), ('', 'بدعم/NN'), ('', 'مرافعة/NN'), ('', 'جنوب/NN'), ('', 'إفريقيا/JJ'), ('', 'في/IN'), ('', 'محكمة/NN'), ('', 'العدل/DTNN'), ('', 'الدولية/DTJJ'), ('', 'الأردن/DTNN'), ('', 'التلفزيون/DTNN'), ('', 'الأردني/DTJJ')]	['No Emotion Detected']	خارج فلسطين تطالب دعم مرافع جنوب افريق محكم عدل دول ارد تلفز اردن		Politics		International		Real
إسرائيل أمام محكمة العدل الدولية بتهمة الإبادة في غزة د غازي الذنيبات رئيس اللجنة القانونية النيابية الاردن غزة	Law	International	Real		Law	Local	Real	إسرائيل أمام محكمة العدل الدولية بتهمة الإبادة في غزة د غازي الذنيبات رئيس اللجنة القانونية النيابية الاردن غزة	[('', 'إسرائيل/NN'), ('', 'أمام/NN'), ('', 'محكمة/NN'), ('', 'العدل/DTNN'), ('', 'الدولية/DTJJ'), ('', 'بتهمة/NN'), ('', 'الإبادة/DTNN'), ('', 'في/IN'), ('', 'غزة/NNP'), ('', 'د/NN'), ('', 'غازي/NNP'), ('', 'الذنيبات/DTNNP'), ('', 'رئيس/NN'), ('', 'اللجنة/DTNN'), ('', 'القانونية/DTJJ'), ('', 'النيابية/DTJJ'), ('', 'التلفزيون/DTNN'), ('', 'الأردني/DTJJ'), ('', 'الاردن/DTNNP'), ('', 'غزة/NNP')]	['حزن']	اسراييل محكم عدل دول تهم اباد غز غاز ذنيب رييس لجن قانون نياب تلفز اردن ارد غز		Law		International		Real
عاجل يحدث الآن الفريق القانوني لجنوب إفريقيا الأسرة الدولية خذلت الفلسطينيين على مدى سنوات ولذلك لجأنا إلى هذه المحكمة إسرائيل ارتكبت وترتكب أفعالا يمكن وصفها بالإبادة الجماعية وينبغي حماية حقوق الفلسطينيين بشكل عاجل الوضع في غزة غير مسبوق والحقوق الأساسية للفلسطينيين في غزة يجري انتهاكها النية بارتكاب الإبادة واضحة في تصريحات القادة والجنود الإسرائيليين من حق الفلسطينيين في قطاع غزة عدم التعرض ل…	Humanitarian	Israeli-Palestinian Conflict	Real		Humanitarian	Local	Real	عاجل يحدث الآن الفريق القانوني لجنوب إفريقيا الأسرة الدولية خذلت الفلسطينيين على مدى سنوات ولذلك لجأنا إلى هذه المحكمة إسرائيل ارتكبت وترتكب أفعالا يمكن وصفها بالإبادة الجماعية وينبغي حماية حقوق الفلسطينيين بشكل عاجل الوضع في غزة غير مسبوق والحقوق الأساسية للفلسطينيين في غزة يجري انتهاكها النية بارتكاب الإبادة واضحة في تصريحات القادة والجنود الإسرائيليين من حق الفلسطينيين في قطاع غزة عدم التعرض ل…	[('', 'عاجل/JJ'), ('', 'يحدث/VBP'), ('', 'الآن/DTNN'), ('', 'الفريق/DTNN'), ('', 'القانوني/DTJJ'), ('', 'لجنوب/NNP'), ('', 'إفريقيا/NNP'), ('', 'الأسرة/DTNN'), ('', 'الدولية/DTJJ'), ('', 'خذلت/VBD'), ('', 'الفلسطينيين/DTNNS'), ('', 'على/IN'), ('', 'مدى/NN'), ('', 'سنوات/NNS'), ('', 'ولذلك/NN'), ('', 'لجأنا/NN'), ('', 'إلى/NN'), ('', 'هذه/DT'), ('', 'المحكمة/DTNN'), ('', 'إسرائيل/NN'), ('', 'ارتكب…	['Conflicting Emotions Detected']	عاجل يحدث فريق قانون جنوب افريق اسر دول خذل فلسطين مدى سنو لذل لجء محكم اسراييل ارتكب ترتكب افعال يمك وصف اباد جماع ينبغ حما حقوق فلسطين شكل عاجل وضع غز مسبوق حقوق اساس فلسطين غز يجر انته الن ارتكاب اباد واضح تصريح قاد جنود اسراييل حق فلسطين قطاع غز عدم تعرض اباد جماع دول عبر دعم للقض يوكد ضرور اتخاذ محكم تدابير موقت ارد تلفز اردن غز محكم عدل دول		Humanitarian		Israeli-Palestinian Conflict		Real
يدعو الى أخذ الحيطة والحذر خلال المنخفض الجوي الرائد عبد المجيد زيدان غرفة عمليات إدارة السير يحدث اليوم	Weather	Natural Disasters	Real		Weather	Local	Real	يدعو الى أخذ الحيطة والحذر خلال المنخفض الجوي الرائد عبد المجيد زيدان غرفة عمليات إدارة السير يحدث اليوم	[('', 'الأمن/DTNN'), ('', 'العام/DTJJ'), ('', 'يدعو/VBP'), ('', 'الى/IN'), ('', 'أخذ/NN'), ('', 'الحيطة/DTNN'), ('', 'والحذر/NN'), ('', 'خلال/NN'), ('', 'المنخفض/DTNN'), ('', 'الجوي/DTJJ'), ('', 'الرائد/DTJJ'), ('', 'عبد/NNP'), ('', 'المجيد/DTNNP'), ('', 'زيدان/NNP'), ('', 'غرفة/NN'), ('', 'عمليات/NNS'), ('', 'إدارة/NN'), ('', 'السير/DTNN'), ('', 'يحدث/VBP'), ('', 'اليوم/DTNN'), ('', 'التلفزيون/D…	['Conflicting Emotions Detected']	امن عام يدع الى حيط حذر خلال منخفض الجو رايد عبد مجيد زيدا غرف عمل ادار سير يحدث يوم تلفز اردن		Weather		Natural Disasters		Real
شهـــداء وجرحـى إثر إطـلاق الجيش الإسرائيلي النار على فلسطينيين كانوا ينتظرون مساعدات غرب غزة الأردن طوفان الأقصى غزة	Politics	Israeli-Palestinian Conflict	Real		Politics	Local	Real	شهـــداء وجرحـى إثر إطـلاق الجيش الإسرائيلي النار على فلسطينيين كانوا ينتظرون مساعدات غرب غزة الأردن طوفان الأقصى غزة	[('', 'شهـــداء/NN'), ('', 'وجرحـى/NN'), ('', 'إثر/NN'), ('', 'إطـلاق/NN'), ('', 'الجيش/DTNN'), ('', 'الإسرائيلي/DTJJ'), ('', 'النار/DTNN'), ('', 'على/IN'), ('', 'فلسطينيين/NNS'), ('', 'كانوا/VBD'), ('', 'ينتظرون/VBP'), ('', 'مساعدات/NNS'), ('', 'غرب/NN'), ('', 'غزة/NNP'), ('', 'الأردن/DTNNP'), ('', 'التلفزيون/DTNN'), ('', 'الأردني/DTJJ'), ('', 'طوفان/NN'), ('', 'الأقصى/DTNN'), ('', 'غزة/NNP')]	['No Emotion Detected']	شهداء جرحى اثر اطلاق جيش اسراييل نار سطين كانو ينتظر مساعد غرب غز ارد تلفز اردن طوفا اقصى غز		Politics		Israeli-Palestinian Conflict		Real
الميــاه ارتفاع تخزين السدود إلى مليون متر مكعب بنسبة	Environment	Water Management	Real		Environment	Local	Real	الميــاه ارتفاع تخزين السدود إلى مليون متر مكعب بنسبة	[('', 'الميــاه/DTNN'), ('', 'ارتفاع/NN'), ('', 'تخزين/NN'), ('', 'السدود/DTNN'), ('', 'إلى/VBD'), ('', 'مليون/CD'), ('', 'متر/NN'), ('', 'مكعب/JJ'), ('', 'بنسبة/NN')]	['حزن']	مياه ارتفاع تخز سدود مليو متر مكعب نسب		Environment		Water Management		Real
مستــوطنون متطــرفون يقتحمــون باحـات الأقــصى الأردن طوفان الأقصى غزة	Politics	Israeli-Palestinian Conflict	Real		Politics	Local	Real	مستــوطنون متطــرفون يقتحمــون باحـات الأقــصى الأردن طوفان الأقصى غزة	[('', 'مستــوطنون/NNS'), ('', 'متطــرفون/JJ'), ('', 'يقتحمــون/VBP'), ('', 'باحـات/NNS'), ('', 'الأقــصى/DTNN'), ('', 'الأردن/DTJJ'), ('', 'التلفزيون/DTNN'), ('', 'الأردني/DTJJ'), ('', 'طوفان/NN'), ('', 'الأقصى/DTNN'), ('', 'غزة/NNP')]	['No Emotion Detected']	مستوطن متطرف يقتحم باح اقصى ارد تلفز اردن طوفا اقصى غز		Politics		Israeli-Palestinian Conflict		Real
عاجل يحدث الآن الفريق القانوني لجنوب إفريقيا هناك مؤججون ومحرضون على ارتكاب الإبادة الجماعية في إسرائيل منهم رئيس الحكومة اتفاقية منع الإبادة تهدف لحماية الشعوب وواجب المجتمع الدولي منع انتهاكها جنوب إفريقيا مصدومة من رد فعل إسرائيل على ما حدث في أكتوبر إسرائيل لا تميز بين المحاربين والمدنيين وما تقوم به يرقى لمستوى إبادة جماعية قطاع غزة تحول إلى سجن مغلق ترتكب فيه جريمة إبادة جماعية أفعال إسرائي…	Humanitarian	Israeli-Palestinian Conflict	Real		Humanitarian	Local	Real	عاجل يحدث الآن الفريق القانوني لجنوب إفريقيا هناك مؤججون ومحرضون على ارتكاب الإبادة الجماعية في إسرائيل منهم رئيس الحكومة اتفاقية منع الإبادة تهدف لحماية الشعوب وواجب المجتمع الدولي منع انتهاكها جنوب إفريقيا مصدومة من رد فعل إسرائيل على ما حدث في أكتوبر إسرائيل لا تميز بين المحاربين والمدنيين وما تقوم به يرقى لمستوى إبادة جماعية قطاع غزة تحول إلى سجن مغلق ترتكب فيه جريمة إبادة جماعية أفعال إسرائي…	[('', 'عاجل/JJ'), ('', 'يحدث/VBP'), ('', 'الآن/DTNN'), ('', 'الفريق/DTNN'), ('', 'القانوني/DTJJ'), ('', 'لجنوب/NNP'), ('', 'إفريقيا/VBD'), ('', 'هناك/RB'), ('', 'مؤججون/NNS'), ('', 'ومحرضون/JJ'), ('', 'على/IN'), ('', 'ارتكاب/NN'), ('', 'الإبادة/DTNN'), ('', 'الجماعية/DTJJ'), ('', 'في/IN'), ('', 'إسرائيل/NNP'), ('', 'منهم/NNP'), ('', 'رئيس/NN'), ('', 'الحكومة/DTNN'), ('', 'اتفاقية/NN'), ('', 'منع/…	['Conflicting Emotions Detected']	عاجل يحدث فريق قانون جنوب افريق موجج محرض ارتكاب اباد جماع اسراييل منهم رييس حكوم اتفاق منع اباد تهدف لحما شعوب واجب مجتمع دول منع انته جنوب افريق مصدوم رد فعل اسراييل حدث اسراييل تميز محارب مدن تقوم يرقى مستوى اباد جماع قطاع غز تحول سجن مغلق ترتكب جريم اباد جماع افعال اسراييل غز تنت اتفاق منع اباد جماع ارد تلفز اردن غز محكم عدل دول		Humanitarian		Israeli-Palestinian Conflict		Real
المستشفى الميداني الأردني في خانيونس اسقبل ألف مراجع وأجرى عملية جراحية نشرت القوات المسلحة الأردنية الجيش العربي الخميس إحصائية توضح الجهود التي تقدمها المستشفيات الميدانية الأردنية في مساندة الأشقاء الفلسطينيين وبينت الإحصائية التي نشرت على الموقع الرسمي للقيادة العاملة للقوات المسلحة أن المستشفى الميداني الأردني الخاص جنوب قطاع غزة أجرى عملية جراحية منذ بدء عمله في التاسع والعشرين من تشرين الث…	Health	Israeli-Palestinian Conflict	Real		Health	Local	Real	المستشفى الميداني الأردني في خانيونس اسقبل ألف مراجع وأجرى عملية جراحية نشرت القوات المسلحة الأردنية الجيش العربي الخميس إحصائية توضح الجهود التي تقدمها المستشفيات الميدانية الأردنية في مساندة الأشقاء الفلسطينيين وبينت الإحصائية التي نشرت على الموقع الرسمي للقيادة العاملة للقوات المسلحة أن المستشفى الميداني الأردني الخاص جنوب قطاع غزة أجرى عملية جراحية منذ بدء عمله في التاسع والعشرين من تشرين الث…	[('', 'المستشفى/DTNN'), ('', 'الميداني/DTJJ'), ('', 'الأردني/DTJJ'), ('', 'في/IN'), ('', 'خانيونس/NNP'), ('', 'اسقبل/NNP'), ('', 'ألف/NNP'), ('', 'مراجع/NN'), ('', 'وأجرى/NN'), ('', 'عملية/NN'), ('', 'جراحية/JJ'), ('', 'نشرت/VBD'), ('', 'القوات/DTNNS'), ('', 'المسلحة/DTJJ'), ('', 'الأردنية/DTJJ'), ('', 'الجيش/DTNN'), ('', 'العربي/DTJJ'), ('', 'الخميس/DTNN'), ('', 'إحصائية/JJ'), ('', 'توضح/VBP'), …	['Conflicting Emotions Detected']	مستشفى ميدان اردن خانيونس اسقبل مراجع اجرى عمل جراح نشر القو مسلح اردن جيش عرب خميس احصاء توضح جهود تقدم مستشف ميدان اردن مساند اشقاء فلسطين بين احصاء نشر موقع رسم قياد عامل للقو مسلح مستشفى ميدان اردن خاص جنوب قطاع غز اجرى عمل جراح بدء عمل تاسع عشر ثان ماض غا يوم خميس اشار عدد مراجع مستشفى بلغ مراجع جانب دخول اقسام مستشفى بلغ عدد عمل جراح اجر مستشفى ميدان اردن نابلس بدء عمل ثالث عشر ثان ماض الى …		Health		Israeli-Palestinian Conflict		Real
عاجل يحدث الآن الفريق القانوني لجنوب إفريقيا حجم الدمار في غزة وقتل الأطفال يشيران بشكل واضح إلى أن نية الإبادة متوفرة صناع القرار في إسرائيل طالبوا بقصف شامل وتحدثوا عن استخدام أسلحة نووية فشل حكومة إسرائيل في منع وإدانة دعوات الإبادة انتهاك صارخ لاتفاقية منع الإبادة إسرائيل منعت الماء والغذاء والوقود من الوصول إلى قطاع غزة إسرائيل مستمرة في استهداف البنى التحتية الحيوية في قطاع غزة إسرائيل ارتك…	Politics	Israeli-Palestinian Conflict	Real		Politics	Local	Real	عاجل يحدث الآن الفريق القانوني لجنوب إفريقيا حجم الدمار في غزة وقتل الأطفال يشيران بشكل واضح إلى أن نية الإبادة متوفرة صناع القرار في إسرائيل طالبوا بقصف شامل وتحدثوا عن استخدام أسلحة نووية فشل حكومة إسرائيل في منع وإدانة دعوات الإبادة انتهاك صارخ لاتفاقية منع الإبادة إسرائيل منعت الماء والغذاء والوقود من الوصول إلى قطاع غزة إسرائيل مستمرة في استهداف البنى التحتية الحيوية في قطاع غزة إسرائيل ارتك…	[('', 'عاجل/JJ'), ('', 'يحدث/VBP'), ('', 'الآن/DTNN'), ('', 'الفريق/DTNN'), ('', 'القانوني/DTJJ'), ('', 'لجنوب/NNP'), ('', 'إفريقيا/NNP'), ('', 'حجم/NN'), ('', 'الدمار/DTNN'), ('', 'في/IN'), ('', 'غزة/NNP'), ('', 'وقتل/NNP'), ('', 'الأطفال/DTNNP'), ('', 'يشيران/VBP'), ('', 'بشكل/NN'), ('', 'واضح/JJ'), ('', 'إلى/VBD'), ('', 'أن/NN'), ('', 'نية/NN'), ('', 'الإبادة/DTNN'), ('', 'متوفرة/JJ'), ('', 'ص…	['Conflicting Emotions Detected']	عاجل يحدث فريق قانون جنوب افريق حجم دمار غز قتل اطفال يشير شكل واضح ني اباد متوفر صناع قرار اسراييل طالب قصف شامل تحدث استخدام اسلح نوو فشل حكوم اسراييل منع ادان دعو اباد انت صارخ اتفاق منع اباد اسراييل منع ماء غذاء وقود وصول قطاع غز اسراييل مستمر استهداف بنى تحت حيو قطاع غز اسراييل ارتكب اعمال وحش كثير قطاع غز ارد تلفز اردن غز محكم عدل دول		Politics		Israeli-Palestinian Conflict		Real
عاجل يحدث الآن الفريق القانوني لجنوب إفريقيا النية لتدمير قطاع غزة موجودة لدى أعلى المستويات السياسية في إسرائيل إسرائيل تحمل كل الفلسطينيين تبعات هجوم حماس وتعتبرهم جميعا إرهابيين نية ارتكاب إبادة جماعية في غزة توجه أفعال وسلوك الجنود الإسرائيليين على الأرض إسرائيل تستخدم الخطاب الديني لتبرير قتل الأطفال والمدنيين في غزة هدف الجنود الإسرائيليين إبادة غزة الجنود الإسرائيليون يؤمنون بأن إجراءاتهم …	Politics	Israeli-Palestinian Conflict	Real		Politics	Local	Real	عاجل يحدث الآن الفريق القانوني لجنوب إفريقيا النية لتدمير قطاع غزة موجودة لدى أعلى المستويات السياسية في إسرائيل إسرائيل تحمل كل الفلسطينيين تبعات هجوم حماس وتعتبرهم جميعا إرهابيين نية ارتكاب إبادة جماعية في غزة توجه أفعال وسلوك الجنود الإسرائيليين على الأرض إسرائيل تستخدم الخطاب الديني لتبرير قتل الأطفال والمدنيين في غزة هدف الجنود الإسرائيليين إبادة غزة الجنود الإسرائيليون يؤمنون بأن إجراءاتهم …	[('', 'عاجل/JJ'), ('', 'يحدث/VBP'), ('', 'الآن/DTNN'), ('', 'الفريق/DTNN'), ('', 'القانوني/DTJJ'), ('', 'لجنوب/NNP'), ('', 'إفريقيا/NNP'), ('', 'النية/DTNN'), ('', 'لتدمير/NNP'), ('', 'قطاع/NN'), ('', 'غزة/NNP'), ('', 'موجودة/JJ'), ('', 'لدى/NN'), ('', 'أعلى/NN'), ('', 'المستويات/DTNNS'), ('', 'السياسية/DTJJ'), ('', 'في/IN'), ('', 'إسرائيل/NN'), ('', 'إسرائيل/NN'), ('', 'تحمل/VBP'), ('كل/NOUN', '…	['Conflicting Emotions Detected']	عاجل يحدث فريق قانون جنوب افريق الن تدمير قطاع غز موجود اعلى مستو سياس اسراييل اسراييل تحمل فلسطين تبع هجوم حماس تعتبر جميع ارهاب ني ارتكاب اباد جماع غز توج افعال وسل جنود اسراييل ارض اسراييل تستخدم خطاب دين تبرير قتل اطفال مدن غز هدف جنود اسراييل اباد غز جنود اسراييل يومن بان اجراء غز مقبول ارد تلفز اردن غز محكم عدل دول		Politics		Israeli-Palestinian Conflict		Real
الاحتلال يعتقل فلسطينيا بالضفة الغربية طوفان الأقصى غزة الأردن	Politics	Israeli-Palestinian Conflict	Real		Politics	Local	Real	الاحتلال يعتقل فلسطينيا بالضفة الغربية طوفان الأقصى غزة الأردن	[('', 'الاحتلال/DTNN'), ('', 'يعتقل/VBN'), ('', 'فلسطينيا/NN'), ('', 'بالضفة/JJ'), ('', 'الغربية/DTNN'), ('', 'طوفان/NN'), ('', 'الأقصى/DTNN'), ('', 'غزة/NNP'), ('', 'الأردن/DTNNP'), ('', 'التلفزيون/DTNN'), ('', 'الأردني/DTJJ')]	['No Emotion Detected']	احتلال يعتقل سطين الضف غرب طوفا اقصى غز ارد تلفز اردن		Politics		Israeli-Palestinian Conflict		Real
عاجل يحدث الآن الفريق القانوني لجنوب إفريقيا إسرائيل تقصف وتقنص النساء والأطفال في قطاع غزة النية بارتكاب إبادة جماعية متوفرة لدى إسرائيل شاحنات المساعدات التي تدخل قطاع غزة تخضع لثلاث مراحل من التفتيش ما أثبتته الوقائع في قطاع غزة يقتضي تدخل هذه المحكمة إسرائيل يتمت أعدادا كبيرة من الأطفال في قطاع غزة إسرائيل تحدد مناطق آمنة للفلسطينيين في قطاع غزة قبل أن تقوم بقصفها الأردن غزة محكمة العدل الدول…	Humanitarian	Israeli-Palestinian Conflict	Real		Humanitarian	Local	Real	عاجل يحدث الآن الفريق القانوني لجنوب إفريقيا إسرائيل تقصف وتقنص النساء والأطفال في قطاع غزة النية بارتكاب إبادة جماعية متوفرة لدى إسرائيل شاحنات المساعدات التي تدخل قطاع غزة تخضع لثلاث مراحل من التفتيش ما أثبتته الوقائع في قطاع غزة يقتضي تدخل هذه المحكمة إسرائيل يتمت أعدادا كبيرة من الأطفال في قطاع غزة إسرائيل تحدد مناطق آمنة للفلسطينيين في قطاع غزة قبل أن تقوم بقصفها الأردن غزة محكمة العدل الدول…	[('', 'عاجل/JJ'), ('', 'يحدث/VBP'), ('', 'الآن/DTNN'), ('', 'الفريق/DTNN'), ('', 'القانوني/DTJJ'), ('', 'لجنوب/NNP'), ('', 'إفريقيا/NNP'), ('', 'إسرائيل/NNP'), ('', 'تقصف/VBP'), ('', 'وتقنص/NN'), ('', 'النساء/DTNN'), ('', 'والأطفال/NN'), ('', 'في/IN'), ('', 'قطاع/NN'), ('', 'غزة/NNP'), ('', 'النية/DTNN'), ('', 'بارتكاب/NNP'), ('', 'إبادة/NNP'), ('', 'جماعية/JJ'), ('', 'متوفرة/JJ'), ('', 'لدى/NN')…	['سعادة']	عاجل يحدث فريق قانون جنوب افريق اسراييل تقصف تقنص نساء اطفال قطاع غز الن ارتكاب اباد جماع متوفر اسراييل شاحن مساعد تدخل قطاع غز تخضع ثلاث مراحل تفتيش اثب وقايع قطاع غز يقتض تدخل محكم اسراييل يتم اعداد كبير اطفال قطاع غز اسراييل تحدد مناطق امن فلسطين قطاع غز تقوم قصف ارد تلفز اردن غز محكم عدل دول		Humanitarian		Israeli-Palestinian Conflict		Real
عاجل يحدث الآن الفريق القانوني لجنوب إفريقيا يتعرض الفلسطينيون إلى قصف لا يتوقف أينما يذهبون ويقتلون في كل مكان يلجأون إليه مئات من العائلات في غزة مسحت بالكامل ولم يبق منها أي فرد على قيد الحياة إسرائيل تتعمد خلق ظروف تحرم الفلسطينيين من المأوى والمياه النظيفة إسرائيل فرضت عن عمد ظروفا في غزة لعدم السماح بالعيش والتدمير الجسدي للفلسطينيين الجنود الإسرائيليون يلتقطون صورا لأنفسهم وهم يحتفلون بتدم…	Politics	Israeli-Palestinian Conflict	Real		Politics	Local	Real	عاجل يحدث الآن الفريق القانوني لجنوب إفريقيا يتعرض الفلسطينيون إلى قصف لا يتوقف أينما يذهبون ويقتلون في كل مكان يلجأون إليه مئات من العائلات في غزة مسحت بالكامل ولم يبق منها أي فرد على قيد الحياة إسرائيل تتعمد خلق ظروف تحرم الفلسطينيين من المأوى والمياه النظيفة إسرائيل فرضت عن عمد ظروفا في غزة لعدم السماح بالعيش والتدمير الجسدي للفلسطينيين الجنود الإسرائيليون يلتقطون صورا لأنفسهم وهم يحتفلون بتدم…	[('', 'عاجل/JJ'), ('', 'يحدث/VBP'), ('', 'الآن/DTNN'), ('', 'الفريق/DTNN'), ('', 'القانوني/DTJJ'), ('', 'لجنوب/NNP'), ('', 'إفريقيا/NNP'), ('', 'يتعرض/VBP'), ('', 'الفلسطينيون/DTNNS'), ('', 'إلى/VBD'), ('', 'قصف/NN'), ('', 'لا/RP'), ('', 'يتوقف/VBP'), ('', 'أينما/NN'), ('', 'يذهبون/VBP'), ('', 'ويقتلون/NNP'), ('', 'في/IN'), ('كل/NOUN', 'QUANT'), ('', 'مكان/NN'), ('', 'يلجأون/VBP'), ('', 'إليه/NN'…	['حزن']	عاجل يحدث فريق قانون جنوب افريق يتعرض فلسطين قصف يتوقف يذهب يقتل مكا يلجء ال ميا عايل غز مسح كامل ولم يبق فرد قيد حيا اسراييل تتعمد خلق ظروف تحرم فلسطين ماوى والم نظيف اسراييل فرض عمد ظروف غز لعدم سماح عيش تدمير جسد فلسطين جنود اسراييل يلتقط صور انفس وهم يحتفل تدمير مدن قرى اسراييل ترتكب عنف جنس بحق نساء اطفال ارد تلفز اردن غز محكم عدل دول		Politics		Israeli-Palestinian Conflict		Real
عاجل يحدث الآن جنوب أفريقيا أمام محكمة العدل الدولية هجوم حماس لا يمكن أن يبرّر انتهاك إسرائيل لاتفاقية الإبادة الجماعية ندين استهداف المدنيين واحتجاز رهائن من قبل حماس يوم أكتوبر إسرائيل هجرت من الفلسطينيين في قطاع غزة إسرائيل دمرت أكثر من ألف منزل في غزة وتركت أكثر من نصف مليون غزي بدون مأوى الأردن غزة محكمة العدل الدولية	Politics	Israeli-Palestinian Conflict	Real		Politics	Local	Real	عاجل يحدث الآن جنوب أفريقيا أمام محكمة العدل الدولية هجوم حماس لا يمكن أن يبرّر انتهاك إسرائيل لاتفاقية الإبادة الجماعية ندين استهداف المدنيين واحتجاز رهائن من قبل حماس يوم أكتوبر إسرائيل هجرت من الفلسطينيين في قطاع غزة إسرائيل دمرت أكثر من ألف منزل في غزة وتركت أكثر من نصف مليون غزي بدون مأوى الأردن غزة محكمة العدل الدولية	[('', 'عاجل/JJ'), ('', 'يحدث/VBP'), ('', 'الآن/DTNN'), ('', 'جنوب/NN'), ('', 'أفريقيا/JJ'), ('', 'أمام/NN'), ('', 'محكمة/NN'), ('', 'العدل/DTNN'), ('', 'الدولية/DTJJ'), ('', 'هجوم/NN'), ('', 'حماس/NNP'), ('', 'لا/RP'), ('', 'يمكن/VBP'), ('', 'أن/NN'), ('', 'يبرر/VBP'), ('', 'انتهاك/NN'), ('', 'إسرائيل/NN'), ('', 'لاتفاقية/JJ'), ('', 'الإبادة/DTNN'), ('', 'الجماعية/DTJJ'), ('', 'ندين/VBP'), ('', '…	['غضب']	عاجل يحدث جنوب افريق محكم عدل دول هجوم حماس يمك يبرر انت اسراييل اتفاق اباد جماع ند استهداف مدن واحتجاز رهاء حماس يوم اسراييل هجر فلسطين قطاع غز اسراييل دمر منزل غز وتر نصف مليو غز بدو ماوى ارد تلفز اردن غز محكم عدل دول		Politics		Israeli-Palestinian Conflict		Real
الأرصاد بدء تأثير المنخفض الجوي على المملكة يحدث اليوم الاردن	Weather	Forecast	Real		Weather	Local	Real	الأرصاد بدء تأثير المنخفض الجوي على المملكة يحدث اليوم الاردن	[('', 'الأرصاد/DTNN'), ('', 'بدء/NN'), ('', 'تأثير/NN'), ('', 'المنخفض/DTNN'), ('', 'الجوي/DTJJ'), ('', 'على/IN'), ('', 'المملكة/DTNN'), ('', 'التلفزيون/DTNN'), ('', 'الأردني/DTJJ'), ('', 'يحدث/VBP'), ('', 'اليوم/DTNN'), ('', 'الاردن/DTNNP')]	['حزن']	ارصاد بدء تاثير منخفض الجو مملك تلفز اردن يحدث يوم ارد		Weather		Forecast		Real
عاجل يحدث الآن وزير العدل في جنوب إفريقيا إسرائيل تحاصر غزة وتمنع الدخول برا وبحرا وهي سلطة احتلال إسرائيل شنت هجوما كبيرا على غزة وانتهكت اتفاقية منع جريمة الإبادة الجماعية الأردن غزة محكمة العدل الدولية	Politics	Israeli-Palestinian Conflict	Real		Politics	Local	Real	عاجل يحدث الآن وزير العدل في جنوب إفريقيا إسرائيل تحاصر غزة وتمنع الدخول برا وبحرا وهي سلطة احتلال إسرائيل شنت هجوما كبيرا على غزة وانتهكت اتفاقية منع جريمة الإبادة الجماعية الأردن غزة محكمة العدل الدولية	[('', 'عاجل/JJ'), ('', 'يحدث/VBP'), ('', 'الآن/DTNN'), ('', 'وزير/NN'), ('', 'العدل/DTNN'), ('', 'في/IN'), ('', 'جنوب/NN'), ('', 'إفريقيا/JJ'), ('', 'إسرائيل/NN'), ('', 'تحاصر/VBP'), ('', 'غزة/NNP'), ('', 'وتمنع/NN'), ('', 'الدخول/DTNN'), ('', 'برا/NN'), ('', 'وبحرا/NN'), ('', 'وهي/JJ'), ('', 'سلطة/NN'), ('', 'احتلال/NN'), ('', 'إسرائيل/NN'), ('', 'شنت/VBD'), ('', 'هجوما/NN'), ('', 'كبيرا/JJ'), (…	['غضب']	عاجل يحدث زير عدل جنوب افريق اسراييل تحاصر غز تمنع دخول برا بحر وه سلط احتلال اسراييل شنت هجوم كبير غز وانته اتفاق منع جريم اباد جماع ارد تلفز اردن غز محكم عدل دول		Politics		Israeli-Palestinian Conflict		Real
[truncated: 503 more rows]
